# Supplementary material
Source: publisher figshare collection journal article supplement (https://acs.figshare.com/ndownloader/files/3963508)
Supplement: Supplementary file 1 [file 3963508]

## Sheet: PROTEIN + PEPTIDE TABLE
Protein List:	D:\Carlos Jerez ICPL sept2011\Aferrooxidans_M3+M4_ICPL_baf.d\BTDataExchange_1\ProteinList.WARPResult
WARP-LC Method:	D:\Methods\WarpLCMethods\ICPL_A ferroxidans trypsin_C12C13.WarpLCMethod
BioTools Method:	CJerez_ICPL_A ferroxidans_trypsin_C12C13
Computer Name:	MSMSANALYSIS
Proteins:															Peptides:
Rel.	Protein Name and Species	Accession	Score	SC [%]	# Pept.	# (L/H)	Avg.	Avg. (SD (L/H))	# (H/L)	Avg.	Avg. (SD (H/L))	Abs. Inten.	S/N		Rel.	Cmpd	MH+ (calc) [Da]	m/z (calc)	Δ m [Da]	z	RT [min]	Ions Sc.	Rank	S/N	L/H EIC	L/H P. EIC	L/H	H/L EIC	H/L P. EIC	H/L	Sequence	Variable Modifications
TRUE	60 kDa chaperonin	B7J561	3377.29	54.9909	153	62	0.81	0.02	62	1.3	0.04	906638418	10648.1		TRUE	20479	727.34097	727.34097	1.07223	1	1809.5617326	26.08	1	23.4	20418422.8800059	28991892.4765859	0.704280443109948	20418422.8800059	28991892.4765859	1.41988892320255	VVDGK	ICPL (K); ICPL (N-term)
		B7J561													TRUE	20466	739.381238	739.381238	0.059262	1	1808.79872407	25.76	1	42.4	28991892.4765859	20418422.8800059	0.704280443109948	28991892.4765859	20418422.8800059	1.41988892320255	VVDGK	ICPL:13C(6) (K); ICPL:13C(6) (N-term)
		B7J561													TRUE	21395	749.394041	375.2006585	0.043283	2	1892.79721282	20.41	2	127.4	67153728.0719099	93109965.7566326	0.721230295019481	67153728.0719099	93109965.7566326	1.3865196829717	VEQIR	ICPL (N-term)
		B7J561													TRUE	3230	770.383146	770.383146	0.015554	1	315.03113057	23.08	1	55	30995186.4801953	55376739.7237635	0.559714902589229	30995186.4801953	55376739.7237635	1.78662386042255	TALQK	ICPL (K); ICPL (N-term)
		B7J561													TRUE	3229	770.383146	385.695211	0.015578	2	315.05357216	28.93	1	69.1	30995186.4801953	55376739.7237635	0.559714902589229	30995186.4801953	55376739.7237635	1.78662386042255	TALQK	ICPL (K); ICPL (N-term)
		B7J561													TRUE	3228	782.423414	782.423414	0.019186	1	315.01982177	24.11	1	7.5	55376739.7237635	30995186.4801953	0.559714902589229	55376739.7237635	30995186.4801953	1.78662386042255	TALQK	ICPL:13C(6) (K); ICPL:13C(6) (N-term)
		B7J561													TRUE	20486	885.410108	885.410108	0.020192	1	1809.85899073	28.47	1	57.5	56857279.3577025	74643322.5319984	0.761719567524994	56857279.3577025	74643322.5319984	1.31281910381958	DGVSVAK	ICPL (K); ICPL (N-term)
		B7J561													TRUE	20484	885.410108	443.208692	1.027616	2	1809.741107	40.69	1	62.2	56857279.3577025	74643322.5319984	0.761719567524994	56857279.3577025	74643322.5319984	1.31281910381958	DGVSVAK	ICPL (K); ICPL (N-term)
		B7J561													TRUE	21516	897.450376	449.228826	0.004948	2	1899.34045442	27.06	2	40.2	11601710.3747454	4979257.57308209	0.429183061139066	11601710.3747454	4979257.57308209	2.33000807941014	DGVSVAK	ICPL:13C(6) (K); ICPL:13C(6) (N-term)
		B7J561													TRUE	20483	897.450376	897.450376	0.010124	1	1809.7524574	25.24	1	72.4	74643322.5319984	56857279.3577025	0.761719567524994	74643322.5319984	56857279.3577025	1.31281910381958	DGVSVAK	ICPL:13C(6) (K); ICPL:13C(6) (N-term)
		B7J561													TRUE	20482	897.450376	449.228826	0.019148	2	1809.6459486	42.91	1	127.9	74643322.5319984	56857279.3577025	0.761719567524994	74643322.5319984	56857279.3577025	1.31281910381958	DGVSVAK	ICPL:13C(6) (K); ICPL:13C(6) (N-term)
		B7J561													TRUE	5577	897.446485	897.446485	0.024015	1	507.33931813	39.79	1	84.6	73660228.1073669	85051585.0616388	0.866065318523855	73660228.1073669	85051585.0616388	1.15464732117945	NVVLDK	ICPL (K); ICPL (N-term)
		B7J561													TRUE	4506	897.446485	449.2268805	0.036239	2	417.70861123	30.39	1	55.5	10610437.9341724	17527800.4994665	0.60534908156305	10610437.9341724	17527800.4994665	1.65193940233284	NVVLDK	ICPL (K); ICPL (N-term)
		B7J561													TRUE	6645	897.446485	449.2268805	0.047239	2	597.64290023	56.75	1	10.3	7225282.30919502	8459371.60889502	0.854115724340287	7225282.30919502	8459371.60889502	1.17080153368256	NVVLDK	ICPL (K); ICPL (N-term)
		B7J561													TRUE	5573	897.446485	449.2268805	0.055839	2	507.1128264	43.56	1	122.3	73660228.1073669	85051585.0616388	0.866065318523855	73660228.1073669	85051585.0616388	1.15464732117945	NVVLDK	ICPL (K); ICPL (N-term)
		B7J561													TRUE	19602	897.446485	449.2268805	1.167839	2	1730.33359392	23.08	1	15.3	2639489.50125316		100	2639489.50125316		0.01	NVVLDK	ICPL (K); ICPL (N-term)
		B7J561													TRUE	5572	909.486753	455.2470145	0.025171	2	507.00611813	50.7	1	145.7	85051585.0616388	73660228.1073669	0.866065318523855	85051585.0616388	73660228.1073669	1.15464732117945	NVVLDK	ICPL:13C(6) (K); ICPL:13C(6) (N-term)
		B7J561													TRUE	4504	909.486753	455.2470145	0.042771	2	417.57143577	45.95	1	91.7	17527800.4994665	10610437.9341724	0.60534908156305	17527800.4994665	10610437.9341724	1.65193940233284	NVVLDK	ICPL:13C(6) (K); ICPL:13C(6) (N-term)
		B7J561													TRUE	5574	909.486753	909.486753	0.052347	1	507.2203096	39.7	1	107.4	85051585.0616388	73660228.1073669	0.866065318523855	85051585.0616388	73660228.1073669	1.15464732117945	NVVLDK	ICPL:13C(6) (K); ICPL:13C(6) (N-term)
		B7J561													TRUE	6644	909.486753	455.2470145	0.086571	2	597.59581649	50.86	1	13.1	8459371.60889502	7225282.30919502	0.854115724340287	8459371.60889502	7225282.30919502	1.17080153368256	NVVLDK	ICPL:13C(6) (K); ICPL:13C(6) (N-term)
		B7J561													TRUE	6642	909.486753	909.486753	0.095247	1	597.4765413	36.6	1	30.8	8459371.60889502	7225282.30919502	0.854115724340287	8459371.60889502	7225282.30919502	1.17080153368256	NVVLDK	ICPL:13C(6) (K); ICPL:13C(6) (N-term)
		B7J561													TRUE	20496	932.483564	932.483564	0.041636	1	1810.65754913	22.58	1	224.8	214355525.404155	245698414.455911	0.87243349078518	214355525.404155	245698414.455911	1.14621917952738	AIEEPLR	ICPL (N-term)
		B7J561													TRUE	21531	932.483564	466.74542	0.10676	2	1900.24170455	38.89	1	39.5	9223104.52075807	12068021.3433086	0.764259878101065	9223104.52075807	12068021.3433086	1.30845544644404	AIEEPLR	ICPL (N-term)
		B7J561													TRUE	20494	932.483564	466.74542	0.97836	2	1810.59364939	37.56	1	355.2	214355525.404155	245698414.455911	0.87243349078518	214355525.404155	245698414.455911	1.14621917952738	AIEEPLR	ICPL (N-term)
		B7J561													TRUE	20879	932.483564	466.74542	1.10276	2	1838.1581326	29.16	1	11.6	39995.2161550532	79784.1179412152	0.501292953874875	39995.2161550532	79784.1179412152	1.99484152384397	AIEEPLR	ICPL (N-term)
		B7J561													TRUE	21530	938.503705	469.7554905	-0.856381	2	1900.17607948	26.42	1	4.6	12068021.3433086	9223104.52075807	0.764259878101065	12068021.3433086	9223104.52075807	1.30845544644404	AIEEPLR	ICPL:13C(6) (N-term)
		B7J561													TRUE	20492	938.503705	469.7554905	-0.845781	2	1810.48671553	41.26	1	29.2	245698414.455911	214355525.404155	0.87243349078518	245698414.455911	214355525.404155	1.14621917952738	AIEEPLR	ICPL:13C(6) (N-term)
		B7J561													TRUE	20495	938.503705	938.503705	0.021495	1	1810.61613259	29.46	1	203.5	245698414.455911	214355525.404155	0.87243349078518	245698414.455911	214355525.404155	1.14621917952738	AIEEPLR	ICPL:13C(6) (N-term)
		B7J561													TRUE	20730	938.503705	469.7554905	0.189419	2	1826.23006539	33.82	1	6.9	113697.867924602		0.01	113697.867924602		100	AIEEPLR	ICPL:13C(6) (N-term)
		B7J561													TRUE	20896	938.503705	469.7554905	1.120619	2	1839.08495712	28.39	1	11.5	101201.624097639		0.01	101201.624097639		100	AIEEPLR	ICPL:13C(6) (N-term)
		B7J561													TRUE	20874	938.503705	469.7554905	1.158219	2	1837.51636567	32.52	1	8.1	79784.1179412152	39995.2161550532	0.501292953874875	79784.1179412152	39995.2161550532	1.99484152384397	AIEEPLR	ICPL:13C(6) (N-term)
		B7J561													TRUE	20791	938.503705	469.7554905	1.182619	2	1831.09043233	32.47	1	10.3	142761.9375		0.01	142761.9375		100	AIEEPLR	ICPL:13C(6) (N-term)
		B7J561													TRUE	6553	1011.468275	506.2377755	0.100249	2	591.99958343	51.39	1	207.3	111132435.511963	163486129.499918	0.679766753619419	111132435.511963	163486129.499918	1.47109283393973	HALEGFK	ICPL (K); ICPL (N-term)
		B7J561													TRUE	20150	1011.521772	506.264524	1.096952	2	1791.2963326	58.37	1	11.2							VEDALHATR
		B7J561													TRUE	6549	1023.508542	512.257909	0.110982	2	591.88953329	55.1	1	124.2	163486129.499918	111132435.511963	0.679766753619419	163486129.499918	111132435.511963	1.47109283393973	HALEGFK	ICPL:13C(6) (K); ICPL:13C(6) (N-term)
		B7J561													TRUE	7619	1023.508542	512.257909	0.111182	2	682.50768445	34.48	1	28	10867301.5642158	7545316.9070387	0.694313750515964	10867301.5642158	7545316.9070387	1.440271057943	HALEGFK	ICPL:13C(6) (K); ICPL:13C(6) (N-term)
		B7J561													TRUE	20701	1027.473066	514.240171	-0.774742	2	1824.36072406	39.38	1	7.4	6513499.5248868	7733360.81483559	0.84225987650691	6513499.5248868	7733360.81483559	1.18728201104306	EIELADK	ICPL (K); ICPL (N-term)
		B7J561													TRUE	9434	1030.535627	515.7714515	0.078097	2	839.06348376	45.83	1	12.2	2523464.30685949	4625698.68451396	0.545531492422456	2523464.30685949	4625698.68451396	1.83307474250379	KIVIDK	2 ICPL (K); ICPL (N-term)
		B7J561													TRUE	12659	1037.577833	519.2925545	0.042291	2	1113.07487546	77.07	1	100.7	73937636.0475181	87731324.9568908	0.842773502894769	73937636.0475181	87731324.9568908	1.18655842473118	LAGGVAVIK	ICPL (K); ICPL (N-term)
		B7J561													TRUE	20700	1039.513334	520.260305	0.19779	2	1824.28088246	50.27	1	62.6	7733360.81483559	6513499.5248868	0.84225987650691	7733360.81483559	6513499.5248868	1.18728201104306	EIELADK	ICPL:13C(6) (K); ICPL:13C(6) (N-term)
		B7J561													TRUE	9429	1048.596021	524.8016485	0.066503	2	838.66265869	45.66	1	45.3	4625698.68451396	2523464.30685949	0.545531492422456	4625698.68451396	2523464.30685949	1.83307474250379	KIVIDK	2 ICPL:13C(6) (K); ICPL:13C(6) (N-term)
		B7J561													TRUE	12654	1049.618101	525.3126885	0.064023	2	1112.56079225	76.74	1	108.8	87731324.9568908	73937636.0475181	0.842773502894769	87731324.9568908	73937636.0475181	1.18655842473118	LAGGVAVIK	ICPL:13C(6) (K); ICPL:13C(6) (N-term)
		B7J561													TRUE	13701	1049.618101	525.3126885	0.959623	2	1202.93124468	22.63	1	13.8	7060508.11494136	6311253.15484105	0.893880872608198	7060508.11494136	6311253.15484105	1.11871730411029	LAGGVAVIK	ICPL:13C(6) (K); ICPL:13C(6) (N-term)
		B7J561													TRUE	21416	1088.584669	544.7959725	0.145055	2	1893.79631255	41.63	1	97.5	37201170.8250018	54636702.709576	0.680882428479376	37201170.8250018	54636702.709576	1.46868234246155	RAIEEPLR	ICPL (N-term)
		B7J561													TRUE	21414	1094.60481	547.806043	0.132114	2	1894.11969602	39.75	1	99.5	54636702.709576	37201170.8250018	0.680882428479376	54636702.709576	37201170.8250018	1.46868234246155	RAIEEPLR	ICPL:13C(6) (N-term)
		B7J561													TRUE	5784	1114.52371	557.765493	0.225814	2	522.02916026	58.11	1	87.6	11866654.5359882	15520500.0589368	0.764579394409094	11866654.5359882	15520500.0589368	1.30790864534461	IIAEAMEK	ICPL (K); ICPL (N-term)
		B7J561													TRUE	5331	1116.543226	558.775251	0.127498	2	493.36697627	48.46	1	96.7	35451344.692921	46929174.8472076	0.755422289190975	35451344.692921	46929174.8472076	1.32376289965042	VEDALHATR	ICPL (N-term)
		B7J561													TRUE	4261	1116.543226	558.775251	0.135898	2	403.79849443	55.7	1	205.7	199719066.144076	262506758.362944	0.760814949640049	199719066.144076	262506758.362944	1.3143800611083	VEDALHATR	ICPL (N-term)
		B7J561													TRUE	5332	1116.543226	558.775251	0.143698	2	493.50980132	68.46	1	124.3	35451344.692921	46929174.8472076	0.755422289190975	35451344.692921	46929174.8472076	1.32376289965042	VEDALHATR	ICPL (N-term)
		B7J561													TRUE	4264	1116.543226	558.775251	0.174498	2	403.64337762	66.64	1	296.4	199719066.144076	262506758.362944	0.760814949640049	199719066.144076	262506758.362944	1.3143800611083	VEDALHATR	ICPL (N-term)
		B7J561													TRUE	6836	1126.563978	563.785627	0.152746	2	612.50425809	57.09	1	3.3	1979999.50385207	1378751.91019438	0.696339523071613	1979999.50385207	1378751.91019438	1.43608105940751	IIAEAMEK	ICPL:13C(6) (K); ICPL:13C(6) (N-term)
		B7J561													TRUE	5783	1126.563978	563.785627	0.185346	2	521.87483493	70.71	1	57.3	15520500.0589368	11866654.5359882	0.764579394409094	15520500.0589368	11866654.5359882	1.30790864534461	IIAEAMEK	ICPL:13C(6) (K); ICPL:13C(6) (N-term)
		B7J561													TRUE	5611	1130.518629	565.7629525	0.120895	2	509.40105146	52.7	1	51.3	8781248.99875807	13394118.0347757	0.655604868940152	8781248.99875807	13394118.0347757	1.52530898926452	IIAEAMEK	ICPL (K); ICPL (N-term); Oxidation (M)
		B7J561													TRUE	9358	1131.546934	566.277105	0.08279	2	833.9690747	54.86	1	395.2	85332415.8000885	103196849.487894	0.826889737657147	85332415.8000885	103196849.487894	1.20935108329356	SFGAPTITK	ICPL (K); ICPL (N-term)
		B7J561													TRUE	5633	1131.546934	566.277105	1.08859	2	510.65517679	22.38	1	26	2299608.41643237		100	2299608.41643237		0.01	SFGAPTITK	ICPL (K); ICPL (N-term)
		B7J561													TRUE	5265	1133.548643	567.2779595	0.094481	2	489.95385999	56.37	1	75.9	16312413.1092178	11424864.6703368	1.42779924138366	16312413.1092178	11424864.6703368	0.700378576354274	QVAFAEHAR	ICPL (N-term)
		B7J561													TRUE	4197	1133.548643	567.2779595	0.128881	2	400.17388643	60.6	1	520.1	217705464.077173	274806419.332919	0.792213895896771	217705464.077173	274806419.332919	1.26228535649204	QVAFAEHAR	ICPL (N-term)
		B7J561													TRUE	4198	1133.548643	567.2779595	0.177481	2	400.03693603	72.28	1	241.4	217705464.077173	274806419.332919	0.792213895896771	217705464.077173	274806419.332919	1.26228535649204	QVAFAEHAR	ICPL (N-term)
		B7J561													TRUE	5785	1142.558896	571.783086	0.235428	2	522.00645147	41.81	1	14.5	1759455.3002166	1400999.29586092	0.796268763229422	1759455.3002166	1400999.29586092	1.25585737652738	IIAEAMEK	ICPL:13C(6) (K); ICPL:13C(6) (N-term); Oxidation (M)
		B7J561													TRUE	9367	1143.587202	572.297239	0.055122	2	834.49804217	51.39	1	91.1	103196849.487894	85332415.8000885	0.826889737657147	103196849.487894	85332415.8000885	1.20935108329356	SFGAPTITK	ICPL:13C(6) (K); ICPL:13C(6) (N-term)
		B7J561													TRUE	21729	1142.558896	571.783086	1.106428	2	1913.08777974	47.29	1	43.3	5576686.62941495	4521413.64916682	0.810770615174616	5576686.62941495	4521413.64916682	1.23339447839341	IIAEAMEK	ICPL:13C(6) (K); ICPL:13C(6) (N-term); Oxidation (M)
		B7J561													TRUE	5606	1142.558896	571.783086	1.111828	2	509.51487652	44.63	1	59.5	13394118.0347757	8781248.99875807	0.655604868940152	13394118.0347757	8781248.99875807	1.52530898926452	IIAEAMEK	ICPL:13C(6) (K); ICPL:13C(6) (N-term); Oxidation (M)
		B7J561													TRUE	9481	1195.610593	598.3089345	0.115131	2	842.54136642	78.59	1	313.8	67559918.4793763	74121718.9040594	0.911472635528374	67559918.4793763	74121718.9040594	1.09712564153976	GVNVLADAVK	ICPL (K); ICPL (N-term)
		B7J561													TRUE	11593	1195.610593	598.3089345	0.126531	2	1022.87782647	66.82	1	25.3	2947747.64301471	2081882.68583054	1.41590477843796	2947747.64301471	2081882.68583054	0.706262183183824	GVNVLADAVK	ICPL (K); ICPL (N-term)
		B7J561													TRUE	10545	1195.610593	598.3089345	0.139931	2	933.76517152	58.78	1	51.4	10795219.2358721	9635834.46330277	1.12032012141603	10795219.2358721	9635834.46330277	0.89260201694499	GVNVLADAVK	ICPL (K); ICPL (N-term)
		B7J561													TRUE	9492	1195.610593	598.3089345	1.098131	2	843.3987499	46.01	1	173	67559918.4793763		100	67559918.4793763		0.01	GVNVLADAVK	ICPL (K); ICPL (N-term)
		B7J561													TRUE	3517	1201.555768	601.281522	0.146956	2	332.40846336	68.56	1	49.8	8115935.18806504	9764137.42553848	0.831198377732528	8115935.18806504	9764137.42553848	1.20308223258081	VVSEEIGMK	ICPL (K); ICPL (N-term)
		B7J561													TRUE	9479	1207.650861	604.3290685	0.092063	2	842.5285083	67.28	1	428.5	74121718.9040594	67559918.4793763	0.911472635528374	74121718.9040594	67559918.4793763	1.09712564153976	GVNVLADAVK	ICPL:13C(6) (K); ICPL:13C(6) (N-term)
		B7J561													TRUE	11590	1207.650861	604.3290685	0.152263	2	1022.72047661	71.86	1	29.7	2081882.68583054	2947747.64301471	1.41590477843796	2081882.68583054	2947747.64301471	0.706262183183824	GVNVLADAVK	ICPL:13C(6) (K); ICPL:13C(6) (N-term)
		B7J561													TRUE	10542	1207.650861	604.3290685	0.157063	2	932.99461312	69.4	1	34	9635834.46330277	10795219.2358721	1.12032012141603	9635834.46330277	10795219.2358721	0.89260201694499	GVNVLADAVK	ICPL:13C(6) (K); ICPL:13C(6) (N-term)
		B7J561													TRUE	3516	1213.596036	607.301656	0.154688	2	332.3784719	68.96	1	86.9	9764137.42553848	8115935.18806504	0.831198377732528	9764137.42553848	8115935.18806504	1.20308223258081	VVSEEIGMK	ICPL:13C(6) (K); ICPL:13C(6) (N-term)
		B7J561													TRUE	21692	1217.550687	609.2789815	1.156837	2	1910.23020427	66.41	1	37.8	5890210.90330172	8651495.75571262	0.680831508171565	5890210.90330172	8651495.75571262	1.46879218719708	VVSEEIGMK	ICPL (K); ICPL (N-term); Oxidation (M)
		B7J561													TRUE	3425	1229.590955	615.2991155	0.137369	2	326.14252203	69.76	1	43	7522644.84501651	6101517.24110825	0.81108670777543	7522644.84501651	6101517.24110825	1.23291380614867	VVSEEIGMK	ICPL:13C(6) (K); ICPL:13C(6) (N-term); Oxidation (M)
		B7J561													TRUE	7396	1343.68144	672.344358	0.191484	2	670.43906791	31.86	1	27.3	6843930.9832223	9440007.75712928	0.724992093153062	6843930.9832223	9440007.75712928	1.37932538774444	ARVEDALHATR	ICPL (N-term)
		B7J561													TRUE	18213	1437.522291	719.2647835	0.074033	2	1613.88799176	67.3	1	76.7	2665622.20172191	3776812.29851357	0.705786253336183	2665622.20172191	3776812.29851357	1.41685955949567	QMEDASSDYDR	ICPL (N-term); Oxidation (M)
		B7J561													TRUE	119	1437.522291	719.2647835	0.180033	2	29.95567465	27.39	1	3.8	299823.763213168	432245.938704434	0.69364159698487	299823.763213168	432245.938704434	1.44166671137777	QMEDASSDYDR	ICPL (N-term); Oxidation (M)
		B7J561													TRUE	118	1437.522291	719.2647835	0.195833	2	29.87160799	72.42	1	6	299823.763213168	432245.938704434	0.69364159698487	299823.763213168	432245.938704434	1.44166671137777	QMEDASSDYDR	ICPL (N-term); Oxidation (M)
		B7J561													TRUE	18212	1443.542432	722.274854	0.094292	2	1613.85627496	52.17	1	103.6	3776812.29851357	2665622.20172191	0.705786253336183	3776812.29851357	2665622.20172191	1.41685955949567	QMEDASSDYDR	ICPL:13C(6) (N-term); Oxidation (M)
		B7J561													TRUE	13895	1466.734785	733.8710305	0.135739	2	1215.5658367	67.89	1	28.5	10433137.5078893	19766863.1847145	0.527809466296967	10433137.5078893	19766863.1847145	1.89462308627363	DMLPILEQVAK	ICPL (K); ICPL (N-term)
		B7J561													TRUE	12855	1466.734785	733.8710305	0.156539	2	1125.48865892	68.86	1	126.5	53126187.5117218	60808667.5797083	0.873661430618977	53126187.5117218	60808667.5797083	1.1446081570655	DMLPILEQVAK	ICPL (K); ICPL (N-term)
		B7J561													TRUE	12854	1478.775052	739.891164	0.113272	2	1125.47777573	51.19	1	98.9	60808667.5797083	53126187.5117218	0.873661430618977	60808667.5797083	53126187.5117218	1.1446081570655	DMLPILEQVAK	ICPL:13C(6) (K); ICPL:13C(6) (N-term)
		B7J561													TRUE	12812	1481.731809	741.3695425	0.141915	2	1123.04475067	36.9	1	81.5	12054099.5610133	14725480.1396301	1.22161593780567	12054099.5610133	14725480.1396301	0.8185878794249	AVIAGMNPMDLK	ICPL:13C(6) (K); ICPL:13C(6) (N-term)
		B7J561													TRUE	12738	1482.729703	741.8684895	0.152421	2	1117.9757672	85.75	1	67.4	13756965.0604293	16618562.8120393	0.827807146503851	13756965.0604293	16618562.8120393	1.20801083226134	DMLPILEQVAK	ICPL (K); ICPL (N-term); Oxidation (M)
		B7J561													TRUE	14877	1482.707914	741.857595	1.15181	2	1300.73675598	60.29	1	85.8	11282800.1710783	11614576.487129	0.971434488685971	11282800.1710783	11614576.487129	1.02940549429398	AMLEDMAILTGGR	ICPL (N-term)
		B7J561													TRUE	14876	1488.728055	744.8676655	-0.820131	2	1300.62616398	41.19	1	8	11614576.487129	11282800.1710783	0.971434488685971	11614576.487129	11282800.1710783	1.02940549429398	AMLEDMAILTGGR	ICPL:13C(6) (N-term)
		B7J561													TRUE	12736	1494.769971	747.8886235	0.119553	2	1117.86752506	62.79	1	35	16618562.8120393	13756965.0604293	0.827807146503851	16618562.8120393	13756965.0604293	1.20801083226134	DMLPILEQVAK	ICPL:13C(6) (K); ICPL:13C(6) (N-term); Oxidation (M)
		B7J561													TRUE	14518	1514.697751	757.8525135	1.149573	2	1279.36873945	32.14	1	22.5	4600606.17709637	4998178.82176581	0.920456498487387	4600606.17709637	4998178.82176581	1.08641744791126	AMLEDMAILTGGR	ICPL (N-term); 2 Oxidation (M)
		B7J561													TRUE	9496	1556.759092	778.883184	0.136032	2	843.53654988	71.1	1	56.3	34421000.0139833	47727552.3422784	0.721197679846076	34421000.0139833	47727552.3422784	1.38658238641787	LESTTLADLGQAK	ICPL (K); ICPL (N-term)
		B7J561													TRUE	11608	1556.759092	778.883184	0.152632	2	1023.79159287	97.02	1	43.2	5669397.41572984	6329271.56112499	0.895742481733892	5669397.41572984	6329271.56112499	1.1163922895164	LESTTLADLGQAK	ICPL (K); ICPL (N-term)
		B7J561													TRUE	10555	1556.759092	778.883184	0.175032	2	934.07694646	89.65	1	94.8	30320992.3398223	37126809.4819895	0.816687260846671	30320992.3398223	37126809.4819895	1.22445891829301	LESTTLADLGQAK	ICPL (K); ICPL (N-term)
		B7J561													TRUE	9504	1556.759092	519.591214666667	1.010656	3	844.02324163	29.81	1	12.4	34421000.0139833	47727552.3422784	0.721197679846076	34421000.0139833	47727552.3422784	1.38658238641787	LESTTLADLGQAK	ICPL (K); ICPL (N-term)
		B7J561													TRUE	13909	1557.831144	779.41921	0.06638	2	1216.19701963	42.34	1	12.1	4879304.01671441	5925709.83133206	0.823412579352975	4879304.01671441	5925709.83133206	1.21445800692744	SVIVVVEELKK	2 ICPL (K); ICPL (N-term)
		B7J561													TRUE	9493	1568.79936	784.903318	0.087764	2	843.42284162	90.92	1	58.9	47727552.3422784	34421000.0139833	0.721197679846076	47727552.3422784	34421000.0139833	1.38658238641787	LESTTLADLGQAK	ICPL:13C(6) (K); ICPL:13C(6) (N-term)
		B7J561													TRUE	11607	1568.79936	784.903318	0.141164	2	1023.77596781	82.75	1	46.1	6329271.56112499	5669397.41572984	0.895742481733892	6329271.56112499	5669397.41572984	1.1163922895164	LESTTLADLGQAK	ICPL:13C(6) (K); ICPL:13C(6) (N-term)
		B7J561													TRUE	10553	1568.79936	784.903318	0.176564	2	933.95135499	77.28	1	139.2	37126809.4819895	30320992.3398223	0.816687260846671	37126809.4819895	30320992.3398223	1.22445891829301	LESTTLADLGQAK	ICPL:13C(6) (K); ICPL:13C(6) (N-term)
		B7J561													TRUE	5382	1645.775098	549.263216666667	0.16645	3	496.37459333	64.09	1	12.3	31142834.1904339	36078388.430718	0.863199148992979	31142834.1904339	36078388.430718	1.15848121626002	TANHDQDMGVAIIR	ICPL (N-term)
		B7J561													TRUE	5381	1645.775098	823.391187	0.182426	2	496.28648507	82.99	1	95	31142834.1904339	36078388.430718	0.863199148992979	31142834.1904339	36078388.430718	1.15848121626002	TANHDQDMGVAIIR	ICPL (N-term)
		B7J561													TRUE	5383	1645.775098	823.391187	0.182426	2	496.30908507	77.83	1	47.4	31142834.1904339	36078388.430718	0.863199148992979	31142834.1904339	36078388.430718	1.15848121626002	TANHDQDMGVAIIR	ICPL (N-term)
		B7J561													TRUE	5282	1661.770017	831.3886465	0.109907	2	490.77225999	68.78	1	26.2	16648442.1864117	21755907.6232848	0.765237767814076	16648442.1864117	21755907.6232848	1.30678338427614	TANHDQDMGVAIIR	ICPL (N-term); Oxidation (M)
		B7J561													TRUE	5280	1661.770017	831.3886465	0.111707	2	490.83320987	62.43	1	73.5	16648442.1864117	21755907.6232848	0.765237767814076	16648442.1864117	21755907.6232848	1.30678338427614	TANHDQDMGVAIIR	ICPL (N-term); Oxidation (M)
		B7J561													TRUE	5281	1667.790159	556.601570333333	0.162389	3	490.84534319	33.49	1	49.2	21755907.6232848	16648442.1864117	0.765237767814076	21755907.6232848	16648442.1864117	1.30678338427614	TANHDQDMGVAIIR	ICPL:13C(6) (N-term); Oxidation (M)
		B7J561													TRUE	199	1678.66493	839.836103	-0.952406	2	36.21478239	20.87	1	16.6	180691.487133393	252272.136273047	0.716256221566308	180691.487133393	252272.136273047	1.39614843109244	QMEDASSDYDREK	ICPL (K)
		B7J561													TRUE	18305	1684.685056	842.846166	-0.964932	2	1619.84874963	34.23	1	48.5	3160968.51945365	2046588.27969837	0.647456077813805	3160968.51945365	2046588.27969837	1.54450631365851	QMEDASSDYDREK	ICPL:13C(6) (K)
		B7J561													TRUE	9393	1698.917341	566.977297666667	0.048007	3	836.12825017	82.6	1	2.8	28951664.5199607	34683981.5888284	0.834727248537289	28951664.5199607	34683981.5888284	1.19799611400289	AAVEEGIVPGGGVALVR	ICPL (N-term)
		B7J561													TRUE	9392	1698.917341	849.9623085	0.073583	2	836.00899148	92.34	1	71.8	28951664.5199607	34683981.5888284	0.834727248537289	28951664.5199607	34683981.5888284	1.19799611400289	AAVEEGIVPGGGVALVR	ICPL (N-term)
		B7J561													TRUE	9391	1698.917341	849.9623085	0.073583	2	835.99753335	107.33	1	5	28951664.5199607	34683981.5888284	0.834727248537289	28951664.5199607	34683981.5888284	1.19799611400289	AAVEEGIVPGGGVALVR	ICPL (N-term)
		B7J561													TRUE	11486	1698.917341	849.9623085	0.075183	2	1016.08529315	92.78	1	56	9429535.78840812	10355995.6503019	0.9105387938371	9429535.78840812	10355995.6503019	1.09825084528898	AAVEEGIVPGGGVALVR	ICPL (N-term)
		B7J561													TRUE	11487	1698.917341	566.977297666667	0.075307	3	1016.09875181	62.28	1	15.1	9429535.78840812	10355995.6503019	0.9105387938371	9429535.78840812	10355995.6503019	1.09825084528898	AAVEEGIVPGGGVALVR	ICPL (N-term)
		B7J561													TRUE	12537	1698.917341	849.9623085	0.099583	2	1105.78730853	56.69	1	19.2	17545122.4717238	18986476.7660487	0.924085215383283	17545122.4717238	18986476.7660487	1.08215128145431	AAVEEGIVPGGGVALVR	ICPL (N-term)
		B7J561													TRUE	12538	1698.917341	849.9623085	0.104983	2	1106.03427546	82.92	1	66.4	17545122.4717238	18986476.7660487	0.924085215383283	17545122.4717238	18986476.7660487	1.08215128145431	AAVEEGIVPGGGVALVR	ICPL (N-term)
		B7J561													TRUE	10444	1698.917341	849.9623085	0.136983	2	926.54352192	100.52	1	135.5	84464803.45271	80555365.2551328	1.04853107158282	84464803.45271	80555365.2551328	0.953715180314531	AAVEEGIVPGGGVALVR	ICPL (N-term)
		B7J561													TRUE	10445	1698.917341	566.977297666667	0.150007	3	926.59784673	80.53	1	13.5	84464803.45271	80555365.2551328	1.04853107158282	84464803.45271	80555365.2551328	0.953715180314531	AAVEEGIVPGGGVALVR	ICPL (N-term)
		B7J561													TRUE	13598	1698.917341	849.9623085	1.045383	2	1196.09815296	56.57	1	28.5	7643808.19679372	6694584.35818954	1.14178980916761	7643808.19679372	6694584.35818954	0.875817941245263	AAVEEGIVPGGGVALVR	ICPL (N-term)
		B7J561													TRUE	11485	1704.937482	852.972379	0.003642	2	1015.92687608	67.25	1	55.2	10355995.6503019	9429535.78840812	0.9105387938371	10355995.6503019	9429535.78840812	1.09825084528898	AAVEEGIVPGGGVALVR	ICPL:13C(6) (N-term)
		B7J561													TRUE	13597	1704.937482	852.972379	0.105242	2	1196.08497802	34.47	1	26.3	6694584.35818954	7643808.19679372	1.14178980916761	6694584.35818954	7643808.19679372	0.875817941245263	AAVEEGIVPGGGVALVR	ICPL:13C(6) (N-term)
		B7J561													TRUE	12673	1754.780897	877.8940865	0.070827	2	1113.81314213	83.65	1	49.3	7563031.62840262	8059900.7884877	0.938352943401639	7563031.62840262	8059900.7884877	1.06569708874667	GYLSPYFVNNQDK	ICPL (K); ICPL (N-term)
		B7J561													TRUE	11603	1754.780897	877.8940865	0.090627	2	1023.47377688	85.67	1	67.6	12779396.7890856	18997096.1698442	0.672702642279164	12779396.7890856	18997096.1698442	1.48654091295365	GYLSPYFVNNQDK	ICPL (K); ICPL (N-term)
		B7J561													TRUE	10559	1754.780897	585.598483	0.106851	3	934.31485472	37.47	1	12.6	32327232.1095108	47167962.561228	0.685364182681144	32327232.1095108	47167962.561228	1.45907829044699	GYLSPYFVNNQDK	ICPL (K); ICPL (N-term)
		B7J561													TRUE	10552	1754.780897	877.8940865	0.121227	2	933.83378006	81.72	1	110.1	32327232.1095108	47167962.561228	0.685364182681144	32327232.1095108	47167962.561228	1.45907829044699	GYLSPYFVNNQDK	ICPL (K); ICPL (N-term)
		B7J561													TRUE	11600	1766.821165	883.9142205	0.063759	2	1023.33169315	85.08	1	50.5	18997096.1698442	12779396.7890856	0.672702642279164	18997096.1698442	12779396.7890856	1.48654091295365	GYLSPYFVNNQDK	ICPL:13C(6) (K); ICPL:13C(6) (N-term)
		B7J561													TRUE	10550	1766.821165	883.9142205	0.066759	2	933.72787126	77.38	1	80.2	47167962.561228	32327232.1095108	0.685364182681144	47167962.561228	32327232.1095108	1.45907829044699	GYLSPYFVNNQDK	ICPL:13C(6) (K); ICPL:13C(6) (N-term)
		B7J561													TRUE	11605	1766.821165	589.611905666667	0.082783	3	1023.56027661	27.68	1	11.7	18997096.1698442	12779396.7890856	0.672702642279164	18997096.1698442	12779396.7890856	1.48654091295365	GYLSPYFVNNQDK	ICPL:13C(6) (K); ICPL:13C(6) (N-term)
		B7J561													TRUE	201	1799.681302	600.565284666667	0.746746	3	36.42759093	50.66	1	17.5	360286.98570198	539146.566322144	0.668254252567577	360286.98570198	539146.566322144	1.49643641796185	QMEDASSDYDREK	ICPL (K); ICPL (N-term); Oxidation (M)
		B7J561													TRUE	18315	1799.681302	900.344289	1.037622	2	1620.33917469	97.27	1	44.7	12504440.0071075	20199511.5519295	0.619046652438141	12504440.0071075	20199511.5519295	1.61538713772453	QMEDASSDYDREK	ICPL (K); ICPL (N-term); Oxidation (M)
		B7J561													TRUE	18312	1799.681302	600.565284666667	1.139146	3	1620.23567443	61.76	1	77.8	12504440.0071075	20199511.5519295	0.619046652438141	12504440.0071075	20199511.5519295	1.61538713772453	QMEDASSDYDREK	ICPL (K); ICPL (N-term); Oxidation (M)
		B7J561													TRUE	18313	1811.72157	906.364423	0.985954	2	1620.24942483	91.75	1	74.2	20199511.5519295	12504440.0071075	0.619046652438141	20199511.5519295	12504440.0071075	1.61538713772453	QMEDASSDYDREK	ICPL:13C(6) (K); ICPL:13C(6) (N-term); Oxidation (M)
		B7J561													TRUE	18309	1811.72157	604.578707333333	1.186178	3	1620.1102915	49.87	1	92.1	20199511.5519295	12504440.0071075	0.619046652438141	20199511.5519295	12504440.0071075	1.61538713772453	QMEDASSDYDREK	ICPL:13C(6) (K); ICPL:13C(6) (N-term); Oxidation (M)
		B7J561													TRUE	16839	2438.808744	813.607765333333	-0.434596	3	1480.76417515	24.42	1	6.8	315766.176537245		100	315766.176537245		0.01	DDKSGGDMGDMGGGMGGMGGMGGF	ICPL (K); ICPL (N-term); 3 Oxidation (M)
		B7J561													TRUE	2505	2680.306028	894.10686	0.08712	3	248.68669523	27.86	2	1.8	964685.738479473	911269.84585788	1.05861698690502	964685.738479473	911269.84585788	0.944628711205178	EVASQASDEAGDGTTTATVLAQAIIR	ICPL (N-term)
TRUE	Rusticyanin	B7JAQ0	2080.09	32.6203	137	51	0.61	0.03	51	1.91	0.11	978952940	16640.3		TRUE	4502	801.359952	801.359952	0.043248	1	417.4628027	23.59	1	124.7	75503062.5368153	160000061.58004	0.471893959234791	75503062.5368153	160000061.58004	2.11912015492118	AMLEK	ICPL (K); ICPL (N-term)
		B7JAQ0													TRUE	4503	801.359952	401.183614	0.046972	2	417.55941123	24.38	1	149	75503062.5368153	160000061.58004	0.471893959234791	75503062.5368153	160000061.58004	2.11912015492118	AMLEK	ICPL (K); ICPL (N-term)
		B7JAQ0													TRUE	4484	813.40022	407.203748	0.051504	2	416.8523611	22.95	1	11.9	160000061.58004	75503062.5368153	0.471893959234791	160000061.58004	75503062.5368153	2.11912015492118	AMLEK	ICPL:13C(6) (K); ICPL:13C(6) (N-term)
		B7JAQ0													TRUE	4499	813.40022	813.40022	0.05218	1	417.24058617	31.59	1	180.2	160000061.58004	75503062.5368153	0.471893959234791	160000061.58004	75503062.5368153	2.11912015492118	AMLEK	ICPL:13C(6) (K); ICPL:13C(6) (N-term)
		B7JAQ0													TRUE	4787	813.40022	407.203748	0.207904	2	438.16951096	27.22	1	10.5	656728.654491705		0.01	656728.654491705		100	AMLEK	ICPL:13C(6) (K); ICPL:13C(6) (N-term)
		B7JAQ0													TRUE	21519	817.354871	409.1810735	0.021653	2	1899.64650402	32.78	1	32.8	20199649.0737465	51335421.886377	0.393483647966414	20199649.0737465	51335421.886377	2.5414016698487	AMLEK	ICPL (K); ICPL (N-term); Oxidation (M)
		B7JAQ0													TRUE	21520	817.354871	817.354871	0.035629	1	1899.62158775	24.02	1	32.4	20199649.0737465	51335421.886377	0.393483647966414	20199649.0737465	51335421.886377	2.5414016698487	AMLEK	ICPL (K); ICPL (N-term); Oxidation (M)
		B7JAQ0													TRUE	4323	817.354871	409.1810735	0.038053	2	406.67591097	33.16	1	68.9	45585351.5582111	97141974.2178905	0.469265237043285	45585351.5582111	97141974.2178905	2.13099100692123	AMLEK	ICPL (K); ICPL (N-term); Oxidation (M)
		B7JAQ0													TRUE	4322	817.354871	817.354871	0.048529	1	406.55967789	24.21	1	69.7	45585351.5582111	97141974.2178905	0.469265237043285	45585351.5582111	97141974.2178905	2.13099100692123	AMLEK	ICPL (K); ICPL (N-term); Oxidation (M)
		B7JAQ0													TRUE	21517	829.395139	415.2012075	0.008785	2	1899.42757122	28.95	1	70.7	51335421.886377	20199649.0737465	0.393483647966414	51335421.886377	20199649.0737465	2.5414016698487	AMLEK	ICPL:13C(6) (K); ICPL:13C(6) (N-term); Oxidation (M)
		B7JAQ0													TRUE	6612	1095.546918	548.277097	0.003006	2	595.47894982	56.38	1	1158.6	402992780.312205	820475544.71367	0.49116976478908	402992780.312205	820475544.71367	2.0359559396524	EATLPQVK	ICPL (K); ICPL (N-term)
		B7JAQ0													TRUE	5543	1095.546918	548.277097	0.053606	2	505.3947848	52.93	1	6.7	171021060.746887	392086986.845722	0.436181425256483	171021060.746887	392086986.845722	2.29262399106514	EATLPQVK	ICPL (K); ICPL (N-term)
		B7JAQ0													TRUE	7681	1095.546918	548.277097	0.135006	2	685.91407645	46.58	1	44.7	29771875.3964325	64620016.8981016	0.460722185253826	29771875.3964325	64620016.8981016	2.17050541954925	EATLPQVK	ICPL (K); ICPL (N-term)
		B7JAQ0													TRUE	6847	1095.546918	548.277097	0.153206	2	613.12254983	51.98	1	14.1	1336275.98753617	2531986.95574147	0.527757848240912	1336275.98753617	2531986.95574147	1.8948083923965	EATLPQVK	ICPL (K); ICPL (N-term)
		B7JAQ0													TRUE	6632	1095.546918	548.277097	0.154806	2	597.26631623	36.37	1	96.6	44980174.1227822		100	44980174.1227822		0.01	EATLPQVK	ICPL (K); ICPL (N-term)
		B7JAQ0													TRUE	6800	1095.546918	548.277097	0.190606	2	609.3149749	52.08	1	17.9	1474544.75516097	2727231.56596531	0.540674570345496	1474544.75516097	2727231.56596531	1.84954139670558	EATLPQVK	ICPL (K); ICPL (N-term)
		B7JAQ0													TRUE	6895	1095.546918	548.277097	0.210006	2	617.67849169	56.25	1	21.7	1932716.25035795	3178573.60926422	0.608045144754519	1932716.25035795	3178573.60926422	1.64461472742081	EATLPQVK	ICPL (K); ICPL (N-term)
		B7JAQ0													TRUE	6862	1095.546918	548.277097	0.236806	2	614.4057413	53.22	1	21.3	1457374.70125994	2591281.35803185	0.562414689837795	1457374.70125994	2591281.35803185	1.77804744091661	EATLPQVK	ICPL (K); ICPL (N-term)
		B7JAQ0													TRUE	6828	1095.546918	548.277097	0.302806	2	611.55627463	50.4	1	11.2	1397769.90759005	2788798.93908812	0.501208562581814	1397769.90759005	2788798.93908812	1.99517740648488	EATLPQVK	ICPL (K); ICPL (N-term)
		B7JAQ0													TRUE	6646	1095.546918	548.277097	0.981606	2	598.00439142	21.65	2	193.6	42053077.4469178	18787608.8922309	2.23834111558005	42053077.4469178	18787608.8922309	0.446759429579105	EATLPQVK	ICPL (K); ICPL (N-term)
		B7JAQ0													TRUE	6609	1107.587186	554.297231	-0.026862	2	595.41516637	50.17	1	1414.1	820475544.71367	402992780.312205	0.49116976478908	820475544.71367	402992780.312205	2.0359559396524	EATLPQVK	ICPL:13C(6) (K); ICPL:13C(6) (N-term)
		B7JAQ0													TRUE	5753	1107.587186	554.297231	-0.006862	2	519.05224345	35.83	1	4.5	911012.037193077	723475.080723544	0.794144370421983	911012.037193077	723475.080723544	1.25921688454283	EATLPQVK	ICPL:13C(6) (K); ICPL:13C(6) (N-term)
		B7JAQ0													TRUE	5544	1107.587186	554.297231	0.046338	2	505.43637625	47.4	1	1042.2	392086986.845722	171021060.746887	0.436181425256483	392086986.845722	171021060.746887	2.29262399106514	EATLPQVK	ICPL:13C(6) (K); ICPL:13C(6) (N-term)
		B7JAQ0													TRUE	5761	1107.587186	554.297231	0.142338	2	520.60771013	55.97	1	12.9	1216117.80228577	1209293.15195995	0.994388166744211	1216117.80228577	1209293.15195995	1.00564350365729	EATLPQVK	ICPL:13C(6) (K); ICPL:13C(6) (N-term)
		B7JAQ0													TRUE	5819	1107.587186	554.297231	0.154738	2	525.1353352	52.89	1	12.1	1338602.20793529	1653759.86073824	1.23543787014147	1338602.20793529	1653759.86073824	0.80942961533589	EATLPQVK	ICPL:13C(6) (K); ICPL:13C(6) (N-term)
		B7JAQ0													TRUE	6842	1107.587186	554.297231	0.158338	2	612.66003303	42.67	1	17.6	2531986.95574147	1336275.98753617	0.527757848240912	2531986.95574147	1336275.98753617	1.8948083923965	EATLPQVK	ICPL:13C(6) (K); ICPL:13C(6) (N-term)
		B7JAQ0													TRUE	5802	1107.587186	554.297231	0.164738	2	523.6650264	53.16	1	25.3	1140914.02763326	1326818.21402688	1.16294320333608	1140914.02763326	1326818.21402688	0.859887221604074	EATLPQVK	ICPL:13C(6) (K); ICPL:13C(6) (N-term)
		B7JAQ0													TRUE	5855	1107.587186	554.297231	0.170738	2	527.85639333	35.75	1	4.4	1360572.15454632	1758493.69482004	1.29246632671709	1360572.15454632	1758493.69482004	0.773714548169343	EATLPQVK	ICPL:13C(6) (K); ICPL:13C(6) (N-term)
		B7JAQ0													TRUE	6789	1107.587186	554.297231	0.173338	2	608.28662449	39.28	1	17.5	2260918.09931032	1459679.99948186	0.645613832684663	2260918.09931032	1459679.99948186	1.54891352906998	EATLPQVK	ICPL:13C(6) (K); ICPL:13C(6) (N-term)
		B7JAQ0													TRUE	6890	1107.587186	554.297231	0.182938	2	617.47459943	42.38	1	39.3	3178573.60926422	1932716.25035795	0.608045144754519	3178573.60926422	1932716.25035795	1.64461472742081	EATLPQVK	ICPL:13C(6) (K); ICPL:13C(6) (N-term)
		B7JAQ0													TRUE	6774	1107.587186	554.297231	0.193938	2	607.00029969	39.25	1	24.1	2306487.28405499	1540188.0649909	0.66776351885328	2306487.28405499	1540188.0649909	1.49753613632151	EATLPQVK	ICPL:13C(6) (K); ICPL:13C(6) (N-term)
		B7JAQ0													TRUE	7676	1107.587186	554.297231	0.204738	2	685.67779324	40.62	1	57.1	64620016.8981016	29771875.3964325	0.460722185253826	64620016.8981016	29771875.3964325	2.17050541954925	EATLPQVK	ICPL:13C(6) (K); ICPL:13C(6) (N-term)
		B7JAQ0													TRUE	5774	1107.587186	554.297231	0.206738	2	521.16436825	50.49	1	7.6	1216117.80228577	1209293.15195995	0.994388166744211	1216117.80228577	1209293.15195995	1.00564350365729	EATLPQVK	ICPL:13C(6) (K); ICPL:13C(6) (N-term)
		B7JAQ0													TRUE	6854	1107.587186	554.297231	0.226338	2	613.7551333	40.24	1	37.1	2591281.35803185	1457374.70125994	0.562414689837795	2591281.35803185	1457374.70125994	1.77804744091661	EATLPQVK	ICPL:13C(6) (K); ICPL:13C(6) (N-term)
		B7JAQ0													TRUE	6821	1107.587186	554.297231	0.257738	2	611.1675413	30.16	1	5.7	2788798.93908812	1397769.90759005	0.501208562581814	2788798.93908812	1397769.90759005	1.99517740648488	EATLPQVK	ICPL:13C(6) (K); ICPL:13C(6) (N-term)
		B7JAQ0													TRUE	6902	1107.587186	554.297231	0.280338	2	618.42815837	43.2	1	8	3238296.3205321		0.01	3238296.3205321		100	EATLPQVK	ICPL:13C(6) (K); ICPL:13C(6) (N-term)
		B7JAQ0													TRUE	5621	1107.587186	554.297231	1.094938	2	510.04665999	28.3	1	21.3	2853822.80907156	1068731.6148514	0.374491230308406	2853822.80907156	1068731.6148514	2.67028949964053	EATLPQVK	ICPL:13C(6) (K); ICPL:13C(6) (N-term)
		B7JAQ0													TRUE	7673	1107.587186	554.297231	1.102738	2	685.51370951	22.29	2	14.5	64620016.8981016	29771875.3964325	0.460722185253826	64620016.8981016	29771875.3964325	2.17050541954925	EATLPQVK	ICPL:13C(6) (K); ICPL:13C(6) (N-term)
		B7JAQ0													TRUE	10397	1318.585126	659.796201	0.040198	2	923.82980513	41.85	1	837.6	298747399.112463	610100390.705334	0.489669247330071	298747399.112463	610100390.705334	2.04219481916113	GFGHSFDITK	ICPL (K); ICPL (N-term)
		B7JAQ0													TRUE	10398	1318.585126	440.199892666667	0.043222	3	923.89518007	38.5	1	256.3	298747399.112463	610100390.705334	0.489669247330071	298747399.112463	610100390.705334	2.04219481916113	GFGHSFDITK	ICPL (K); ICPL (N-term)
		B7JAQ0													TRUE	11438	1318.585126	440.199892666667	0.107722	3	1013.13553475	48.05	1	76.9	29780538.5850682	74504398.2030295	0.399715175256019	29780538.5850682	74504398.2030295	2.50178142313335	GFGHSFDITK	ICPL (K); ICPL (N-term)
		B7JAQ0													TRUE	11427	1318.585126	659.796201	0.117998	2	1012.71333474	47.15	1	8.9	29780538.5850682	74504398.2030295	0.399715175256019	29780538.5850682	74504398.2030295	2.50178142313335	GFGHSFDITK	ICPL (K); ICPL (N-term)
		B7JAQ0													TRUE	2379	1318.585126	659.796201	0.302398	2	239.45460352	22.77	2	16.8	1206951.69792731	3112464.791585	0.3877800324651	1206951.69792731	3112464.791585	2.57878156758883	GFGHSFDITK	ICPL (K); ICPL (N-term)
		B7JAQ0													TRUE	4383	1323.585187	662.2962315	0.094537	2	410.43544429	78.3	1	284.8	277255702.425754	635746846.256233	0.436110228557876	277255702.425754	635746846.256233	2.29299827088851	VSGDTVTYSGK	ICPL (K); ICPL (N-term)
		B7JAQ0													TRUE	3314	1323.585187	662.2962315	0.102537	2	319.85688042	78.28	1	636.5	497194214.784095	1141267571.2429	0.435650873916119	497194214.784095	1141267571.2429	2.29541603121527	VSGDTVTYSGK	ICPL (K); ICPL (N-term)
		B7JAQ0													TRUE	4403	1323.585187	662.2962315	0.149737	2	411.63655257	54.44	1	69.6	39724222.536289	78495291.4159345	0.506071406573885	39724222.536289	78495291.4159345	1.97600573162199	VSGDTVTYSGK	ICPL (K); ICPL (N-term)
		B7JAQ0													TRUE	3606	1323.585187	662.2962315	0.159137	2	340.23255509	66.98	1	24.5	1068049.54539688	2366468.42732356	0.451326344803523	1068049.54539688	2366468.42732356	2.21569161985289	VSGDTVTYSGK	ICPL (K); ICPL (N-term)
		B7JAQ0													TRUE	3718	1323.585187	662.2962315	0.160337	2	348.6197135	56.5	1	14.9	867834.954810913	1869371.02883968	0.464239009496995	867834.954810913	1869371.02883968	2.15406284164596	VSGDTVTYSGK	ICPL (K); ICPL (N-term)
		B7JAQ0													TRUE	3534	1323.585187	662.2962315	0.161937	2	333.93718016	57.55	1	8.5	1214143.50498134	870075.098890077	1.3954467913519	1214143.50498134	870075.098890077	0.716616359862211	VSGDTVTYSGK	ICPL (K); ICPL (N-term)
		B7JAQ0													TRUE	3677	1323.585187	662.2962315	0.179337	2	345.28318016	50.49	1	9.3	974636.677561155	2344398.36186061	0.415729977215836	974636.677561155	2344398.36186061	2.40540748756452	VSGDTVTYSGK	ICPL (K); ICPL (N-term)
		B7JAQ0													TRUE	3658	1323.585187	662.2962315	0.179737	2	344.5879551	51.48	1	22.7	974636.677561155	2344398.36186061	0.415729977215836	974636.677561155	2344398.36186061	2.40540748756452	VSGDTVTYSGK	ICPL (K); ICPL (N-term)
		B7JAQ0													TRUE	3641	1323.585187	662.2962315	0.180937	2	342.85309642	57.72	1	15.1	992469.671157652		100	992469.671157652		0.01	VSGDTVTYSGK	ICPL (K); ICPL (N-term)
		B7JAQ0													TRUE	3585	1323.585187	662.2962315	0.184337	2	338.75698869	40.69	1	24.9	1155468.91579182	2474934.77887461	0.46686843049546	1155468.91579182	2474934.77887461	2.14193107668205	VSGDTVTYSGK	ICPL (K); ICPL (N-term)
		B7JAQ0													TRUE	3692	1323.585187	662.2962315	0.185537	2	346.67173055	51.37	1	22.6	983897.778372174	1860281.69104622	0.528897200412067	983897.778372174	1860281.69104622	1.89072658963007	VSGDTVTYSGK	ICPL (K); ICPL (N-term)
		B7JAQ0													TRUE	4395	1323.585187	662.2962315	0.190137	2	411.35681123	53.32	1	14.4	39724222.536289	78495291.4159345	0.506071406573885	39724222.536289	78495291.4159345	1.97600573162199	VSGDTVTYSGK	ICPL (K); ICPL (N-term)
		B7JAQ0													TRUE	10395	1330.625394	665.816335	0.00513	2	923.77049686	45.04	1	1521.5	610100390.705334	298747399.112463	0.489669247330071	610100390.705334	298747399.112463	2.04219481916113	GFGHSFDITK	ICPL:13C(6) (K); ICPL:13C(6) (N-term)
		B7JAQ0													TRUE	10396	1330.625394	444.213315333333	0.007454	3	923.84048033	30.56	1	756.9	610100390.705334	298747399.112463	0.489669247330071	610100390.705334	298747399.112463	2.04219481916113	GFGHSFDITK	ICPL:13C(6) (K); ICPL:13C(6) (N-term)
		B7JAQ0													TRUE	10832	1330.625394	665.816335	0.08273	2	951.41741313	28.2	1	16.8	656609.707004271		0.01	656609.707004271		100	GFGHSFDITK	ICPL:13C(6) (K); ICPL:13C(6) (N-term)
		B7JAQ0													TRUE	11437	1330.625394	444.213315333333	0.100154	3	1013.01167661	31.37	1	164.7	74504398.2030295	29780538.5850682	0.399715175256019	74504398.2030295	29780538.5850682	2.50178142313335	GFGHSFDITK	ICPL:13C(6) (K); ICPL:13C(6) (N-term)
		B7JAQ0													TRUE	12484	1330.625394	665.816335	0.14493	2	1102.90495067	44.92	1	65	27053329.327595	12150665.7426446	0.449137538508084	27053329.327595	12150665.7426446	2.22648946984421	GFGHSFDITK	ICPL:13C(6) (K); ICPL:13C(6) (N-term)
		B7JAQ0													TRUE	10440	1330.625394	665.816335	0.16493	2	926.29364672	30.67	1	26.8	10630510.4033712		0.01	10630510.4033712		100	GFGHSFDITK	ICPL:13C(6) (K); ICPL:13C(6) (N-term)
		B7JAQ0													TRUE	11424	1330.625394	665.816335	0.16693	2	1012.58080995	42.23	1	205.7	74504398.2030295	29780538.5850682	0.399715175256019	74504398.2030295	29780538.5850682	2.50178142313335	GFGHSFDITK	ICPL:13C(6) (K); ICPL:13C(6) (N-term)
		B7JAQ0													TRUE	15611	1330.625394	665.816335	0.17373	2	1373.11834962	26.53	1	24.8	3524652.57590927	1117150.19670834	0.316953280542876	3524652.57590927	1117150.19670834	3.15503912212931	GFGHSFDITK	ICPL:13C(6) (K); ICPL:13C(6) (N-term)
		B7JAQ0													TRUE	10479	1330.625394	665.816335	0.19773	2	928.63080512	42.41	1	24.3	2460166.61254022	1547047.02981253	0.628838316041996	2460166.61254022	1547047.02981253	1.59023388761383	GFGHSFDITK	ICPL:13C(6) (K); ICPL:13C(6) (N-term)
		B7JAQ0													TRUE	2377	1330.625394	665.816335	0.22873	2	239.24036191	42.39	1	30.9	3112464.791585	1206951.69792731	0.3877800324651	3112464.791585	1206951.69792731	2.57878156758883	GFGHSFDITK	ICPL:13C(6) (K); ICPL:13C(6) (N-term)
		B7JAQ0													TRUE	523	1330.625394	665.816335	0.26553	2	59.53679146	40.34	1	31.5	2220219.84211767	1066861.72597001	0.480520760030875	2220219.84211767	1066861.72597001	2.0810755396619	GFGHSFDITK	ICPL:13C(6) (K); ICPL:13C(6) (N-term)
		B7JAQ0													TRUE	1440	1330.625394	665.816335	0.32133	2	149.43407293	24.55	1	19.2	2985571.84101857	1191465.27391537	0.399074394240295	2985571.84101857	1191465.27391537	2.50579845370352	GFGHSFDITK	ICPL:13C(6) (K); ICPL:13C(6) (N-term)
		B7JAQ0													TRUE	3493	1335.625455	668.3163655	-0.825531	2	331.08558817	35.77	2	50.5	5831919.48302723	2864852.58696953	0.491236649495449	5831919.48302723	2864852.58696953	2.03567873249503	VSGDTVTYSGK	ICPL:13C(6) (K); ICPL:13C(6) (N-term)
		B7JAQ0													TRUE	3318	1335.625455	668.3163655	0.057469	2	320.11844683	78.3	1	2271.6	1141267571.2429	497194214.784095	0.435650873916119	1141267571.2429	497194214.784095	2.29541603121527	VSGDTVTYSGK	ICPL:13C(6) (K); ICPL:13C(6) (N-term)
		B7JAQ0													TRUE	3306	1335.625455	668.3163655	0.078469	2	319.4040383	78.25	1	901	1141267571.2429		0.01	1141267571.2429		100	VSGDTVTYSGK	ICPL:13C(6) (K); ICPL:13C(6) (N-term)
		B7JAQ0													TRUE	4378	1335.625455	668.3163655	0.087469	2	410.2629611	75.69	1	485.9	635746846.256233	277255702.425754	0.436110228557876	635746846.256233	277255702.425754	2.29299827088851	VSGDTVTYSGK	ICPL:13C(6) (K); ICPL:13C(6) (N-term)
		B7JAQ0													TRUE	4710	1335.625455	668.3163655	0.128269	2	432.15338617	47.26	1	17.5	1092902.08475442	633347.225928324	0.579509577997226	1092902.08475442	633347.225928324	1.72559701852725	VSGDTVTYSGK	ICPL:13C(6) (K); ICPL:13C(6) (N-term)
		B7JAQ0													TRUE	4401	1335.625455	668.3163655	0.138069	2	411.57345283	75.34	1	141.8	78495291.4159345	39724222.536289	0.506071406573885	78495291.4159345	39724222.536289	1.97600573162199	VSGDTVTYSGK	ICPL:13C(6) (K); ICPL:13C(6) (N-term)
		B7JAQ0													TRUE	3457	1335.625455	668.3163655	0.139069	2	328.50696309	39.37	1	23.7	3137410.67954101	1481485.35715914	0.472200010926166	3137410.67954101	1481485.35715914	2.11774666849036	VSGDTVTYSGK	ICPL:13C(6) (K); ICPL:13C(6) (N-term)
		B7JAQ0													TRUE	3869	1335.625455	668.3163655	0.143469	2	357.64102177	55.31	1	42.1	1357019.03367756		0.01	1357019.03367756		100	VSGDTVTYSGK	ICPL:13C(6) (K); ICPL:13C(6) (N-term)
		B7JAQ0													TRUE	4926	1335.625455	668.3163655	0.144869	2	447.10507788	37.88	1	17.1	1152882.42229842		0.01	1152882.42229842		100	VSGDTVTYSGK	ICPL:13C(6) (K); ICPL:13C(6) (N-term)
		B7JAQ0													TRUE	3716	1335.625455	668.3163655	0.148869	2	348.42245536	77.62	1	39.1	1869371.02883968	867834.954810913	0.464239009496995	1869371.02883968	867834.954810913	2.15406284164596	VSGDTVTYSGK	ICPL:13C(6) (K); ICPL:13C(6) (N-term)
		B7JAQ0													TRUE	3683	1335.625455	668.3163655	0.152669	2	345.79705482	65.54	1	26.7	2015954.3013607	982554.096274936	0.487389072069614	2015954.3013607	982554.096274936	2.05174891540689	VSGDTVTYSGK	ICPL:13C(6) (K); ICPL:13C(6) (N-term)
		B7JAQ0													TRUE	3698	1335.625455	668.3163655	0.154269	2	347.11208843	75.24	1	50.5	1860281.69104622	983897.778372174	0.528897200412067	1860281.69104622	983897.778372174	1.89072658963007	VSGDTVTYSGK	ICPL:13C(6) (K); ICPL:13C(6) (N-term)
		B7JAQ0													TRUE	3611	1335.625455	668.3163655	0.157869	2	340.69068043	83.83	1	26.4	2366468.42732356	1068049.54539688	0.451326344803523	2366468.42732356	1068049.54539688	2.21569161985289	VSGDTVTYSGK	ICPL:13C(6) (K); ICPL:13C(6) (N-term)
		B7JAQ0													TRUE	4678	1335.625455	668.3163655	0.159269	2	429.64572802	43.94	1	24.7	1302567.33084546		0.01	1302567.33084546		100	VSGDTVTYSGK	ICPL:13C(6) (K); ICPL:13C(6) (N-term)
		B7JAQ0													TRUE	3529	1335.625455	668.3163655	0.160269	2	334.07609696	36.41	1	35.1	870075.098890077	1214143.50498134	1.3954467913519	870075.098890077	1214143.50498134	0.716616359862211	VSGDTVTYSGK	ICPL:13C(6) (K); ICPL:13C(6) (N-term)
		B7JAQ0													TRUE	3595	1335.625455	668.3163655	0.161869	2	339.36962175	65.28	1	52.4	2474934.77887461	1155468.91579182	0.46686843049546	2474934.77887461	1155468.91579182	2.14193107668205	VSGDTVTYSGK	ICPL:13C(6) (K); ICPL:13C(6) (N-term)
		B7JAQ0													TRUE	4637	1335.625455	668.3163655	0.162069	2	426.28424483	55.09	1	19.7	1664751.22556795	946939.477712226	0.568817408372334	1664751.22556795	946939.477712226	1.75803339574556	VSGDTVTYSGK	ICPL:13C(6) (K); ICPL:13C(6) (N-term)
		B7JAQ0													TRUE	4434	1335.625455	668.3163655	0.164069	2	413.40007789	38.69	1	38.9	12629133.0339631	6947966.44384042	0.550153872411947	12629133.0339631	6947966.44384042	1.81767329132097	VSGDTVTYSGK	ICPL:13C(6) (K); ICPL:13C(6) (N-term)
		B7JAQ0													TRUE	4651	1335.625455	668.3163655	0.165269	2	427.95854456	36.39	1	21.9	1102842.22959649	912297.86689404	0.827224277789793	1102842.22959649	912297.86689404	1.20886200616819	VSGDTVTYSGK	ICPL:13C(6) (K); ICPL:13C(6) (N-term)
		B7JAQ0													TRUE	3382	1335.625455	668.3163655	0.168469	2	323.64008043	72.86	1	34.3	7399915.65087775	3206479.60006183	0.433312993193576	7399915.65087775	3206479.60006183	2.30780063304787	VSGDTVTYSGK	ICPL:13C(6) (K); ICPL:13C(6) (N-term)
		B7JAQ0													TRUE	4792	1335.625455	668.3163655	0.169669	2	438.79356109	60.69	1	13.1	1017388.55714091	754999.317543605	0.742095350143626	1017388.55714091	754999.317543605	1.3475357308282	VSGDTVTYSGK	ICPL:13C(6) (K); ICPL:13C(6) (N-term)
		B7JAQ0													TRUE	3628	1335.625455	668.3163655	0.170269	2	341.84438017	78.02	1	50.5	2469516.07685434		0.01	2469516.07685434		100	VSGDTVTYSGK	ICPL:13C(6) (K); ICPL:13C(6) (N-term)
		B7JAQ0													TRUE	3660	1335.625455	668.3163655	0.177869	2	344.4873631	77.96	1	53.2	2344398.36186061	974636.677561155	0.415729977215836	2344398.36186061	974636.677561155	2.40540748756452	VSGDTVTYSGK	ICPL:13C(6) (K); ICPL:13C(6) (N-term)
		B7JAQ0													TRUE	3359	1335.625455	668.3163655	0.179469	2	322.50903883	75.37	1	26.1	14703624.6295293		0.01	14703624.6295293		100	VSGDTVTYSGK	ICPL:13C(6) (K); ICPL:13C(6) (N-term)
		B7JAQ0													TRUE	3563	1335.625455	668.3163655	0.179669	2	336.11151349	43.96	1	59.2	3750936.99325665	1212186.9845191	0.323169113930291	3750936.99325665	1212186.9845191	3.09435511283329	VSGDTVTYSGK	ICPL:13C(6) (K); ICPL:13C(6) (N-term)
		B7JAQ0													TRUE	3406	1335.625455	668.3163655	0.180269	2	324.8946303	57.71	1	41.3	7735508.33768862	5435499.12151971	0.70266863976309	7735508.33768862	5435499.12151971	1.42314590891257	VSGDTVTYSGK	ICPL:13C(6) (K); ICPL:13C(6) (N-term)
		B7JAQ0													TRUE	4696	1335.625455	668.3163655	0.181869	2	430.97039469	58.27	1	18.5	1044925.88541629	732702.294495673	0.70120025230667	1044925.88541629	732702.294495673	1.42612612689513	VSGDTVTYSGK	ICPL:13C(6) (K); ICPL:13C(6) (N-term)
		B7JAQ0													TRUE	3737	1335.625455	668.3163655	0.206469	2	349.81665537	58.48	1	17.8	1794276.77518936		0.01	1794276.77518936		100	VSGDTVTYSGK	ICPL:13C(6) (K); ICPL:13C(6) (N-term)
		B7JAQ0													TRUE	11449	1569.761945	785.3846105	0.145779	2	1013.85342647	24.24	1	54.6	9072512.52240235	3823433.34282167	0.421430483934923	9072512.52240235	3823433.34282167	2.37287058748797	GFGHSFDITKK	2 ICPL:13C(6) (K); ICPL:13C(6) (N-term)
		B7JAQ0													TRUE	11448	1569.761945	523.925499	0.154803	3	1013.78655181	25.96	1	32.7	9072512.52240235	3823433.34282167	0.421430483934923	9072512.52240235	3823433.34282167	2.37287058748797	GFGHSFDITKK	2 ICPL:13C(6) (K); ICPL:13C(6) (N-term)
		B7JAQ0													TRUE	2605	2658.319837	886.778129666667	0.162211	3	255.98222058	28.36	1	13.8	1151205.63198756	1805526.72126125	0.637600993899102	1151205.63198756	1805526.72126125	1.56837898555448	KNPTLEIPAGATVDVTFINTNK	2 ICPL (K); ICPL (N-term)
TRUE	Phosphate ABC transporter, periplasmic phosphate-binding protein PstS	B7JC36	1564.79	21.5084	66	22	0.7	0.04	22	1.54	0.09	389805325	8553		TRUE	21615	806.404264	806.404264	0.069836	1	1905.02187895	34.38	1	58.3	14713387.5686068	23376941.8073146	0.629397450268835	14713387.5686068	23376941.8073146	1.58882118059561	QIAEIQ	ICPL (N-term)
		B7JC36													TRUE	21622	806.404264	403.70577	0.11186	2	1905.41950455	44.23	1	31.4	14713387.5686068	23376941.8073146	0.629397450268835	14713387.5686068	23376941.8073146	1.58882118059561	QIAEIQ	ICPL (N-term)
		B7JC36													TRUE	21597	812.424406	812.424406	-0.472006	1	1904.25562081	30.25	1	14.1	23376941.8073146	14713387.5686068	0.629397450268835	23376941.8073146	14713387.5686068	1.58882118059561	QIAEIQ	ICPL:13C(6) (N-term)
		B7JC36													TRUE	21613	812.424406	812.424406	0.065194	1	1904.85751254	34.25	1	50	23376941.8073146	14713387.5686068	0.629397450268835	23376941.8073146	14713387.5686068	1.58882118059561	QIAEIQ	ICPL:13C(6) (N-term)
		B7JC36													TRUE	21619	812.424406	406.715841	0.069918	2	1905.25602082	29.9	1	58.6	23376941.8073146	14713387.5686068	0.629397450268835	23376941.8073146	14713387.5686068	1.58882118059561	QIAEIQ	ICPL:13C(6) (N-term)
		B7JC36													TRUE	10147	839.488615	420.2479455	-0.086291	2	908.95305472	21.93	1	132.4	90595122.2094206	160305929.205898	0.565138935647598	90595122.2094206	160305929.205898	1.76947638345621	IIPVHR	ICPL (N-term)
		B7JC36													TRUE	10138	845.508756	423.258016	-0.072032	2	908.61576353	26.03	1	37.9	160305929.205898	90595122.2094206	0.565138935647598	160305929.205898	90595122.2094206	1.76947638345621	IIPVHR	ICPL:13C(6) (N-term)
		B7JC36													TRUE	21588	998.480268	499.743772	1.046456	2	1903.29291255	52.69	1	16.4	6184593.97421816	3347959.51332222	0.541338611278108	6184593.97421816	3347959.51332222	1.8472726296744	AAAGEMVK	ICPL:13C(6) (K); ICPL:13C(6) (N-term)
		B7JC36													TRUE	20540	998.480268	499.743772	1.116456	2	1813.35859873	52.86	1	23.5	12640156.518833	9473934.06493197	0.749510819016874	12640156.518833	9473934.06493197	1.33420355600963	AAAGEMVK	ICPL:13C(6) (K); ICPL:13C(6) (N-term)
		B7JC36													TRUE	20388	1002.434919	501.7210975	0.091605	2	1804.75759073	50.37	1	29.4	7518045.49214378	13778585.1458688	0.545632618483902	7518045.49214378	13778585.1458688	1.83273500543022	AAAGEMVK	ICPL (K); ICPL (N-term); Oxidation (M)
		B7JC36													TRUE	20383	1014.475187	507.7412315	0.146137	2	1804.50593207	45.65	1	51.9	13778585.1458688	7518045.49214378	0.545632618483902	13778585.1458688	7518045.49214378	1.83273500543022	AAAGEMVK	ICPL:13C(6) (K); ICPL:13C(6) (N-term); Oxidation (M)
		B7JC36													TRUE	4476	1039.520688	520.263982	0.071436	2	415.87001977	49.33	1	242.5	56976922.9323772	109707208.621646	0.519354412970955	56976922.9323772	109707208.621646	1.92546741690231	KQIAEIQ	ICPL (K); ICPL (N-term)
		B7JC36													TRUE	4473	1051.560956	526.284116	0.087768	2	415.60121122	41.53	1	60.1	109707208.621646	56976922.9323772	0.519354412970955	109707208.621646	56976922.9323772	1.92546741690231	KQIAEIQ	ICPL:13C(6) (K); ICPL:13C(6) (N-term)
		B7JC36													TRUE	16849	1269.662626	635.334951	0.188698	2	1481.46950847	42.36	1	40.4	1790779.59730831	2933511.43809435	0.610455979156376	1790779.59730831	2933511.43809435	1.6381197566153	FVLPTVANAK	ICPL (K); ICPL (N-term)
		B7JC36													TRUE	15891	1269.662626	635.334951	0.198898	2	1391.75350801	62.1	1	1099.8	182808279.335726	281822992.087603	0.648663467737583	182808279.335726	281822992.087603	1.54163144640751	FVLPTVANAK	ICPL (K); ICPL (N-term)
		B7JC36													TRUE	15926	1269.662626	635.334951	0.206298	2	1393.98381628	25.43	3	12.6	4470377.51957976	5494137.4998268	0.813663203682232	4470377.51957976	5494137.4998268	1.22900973704415	FVLPTVANAK	ICPL (K); ICPL (N-term)
		B7JC36													TRUE	16813	1269.662626	635.334951	0.222298	2	1478.88051648	68.9	1	67.2	2968757.06661965	4423540.93181356	0.671126844394887	2968757.06661965	4423540.93181356	1.49003129341613	FVLPTVANAK	ICPL (K); ICPL (N-term)
		B7JC36													TRUE	16845	1281.702894	641.355085	0.17523	2	1481.15214155	59.71	1	56.9	2933511.43809435	1790779.59730831	0.610455979156376	2933511.43809435	1790779.59730831	1.6381197566153	FVLPTVANAK	ICPL:13C(6) (K); ICPL:13C(6) (N-term)
		B7JC36													TRUE	15933	1281.702894	641.355085	0.23883	2	1394.24730801	33.9	1	17.6	5494137.4998268	4470377.51957976	0.813663203682232	5494137.4998268	4470377.51957976	1.22900973704415	FVLPTVANAK	ICPL:13C(6) (K); ICPL:13C(6) (N-term)
		B7JC36													TRUE	15896	1281.702894	641.355085	0.93963	2	1392.21694107	70.71	1	484.6	281822992.087603	182808279.335726	0.648663467737583	281822992.087603	182808279.335726	1.54163144640751	FVLPTVANAK	ICPL:13C(6) (K); ICPL:13C(6) (N-term)
		B7JC36													TRUE	15890	1281.702894	641.355085	0.98683	2	1391.68207495	67.34	1	992.7	281822992.087603	182808279.335726	0.648663467737583	281822992.087603	182808279.335726	1.54163144640751	FVLPTVANAK	ICPL:13C(6) (K); ICPL:13C(6) (N-term)
		B7JC36													TRUE	13842	1281.702894	641.355085	1.13343	2	1212.63001109	33.92	1	22.8	6393147.88538823		0.01	6393147.88538823		100	FVLPTVANAK	ICPL:13C(6) (K); ICPL:13C(6) (N-term)
		B7JC36													TRUE	20183	1304.62631	652.816793	0.138214	2	1793.06273259	69.72	1	51.2							TQPNAEVATAMR	Oxidation (M)
		B7JC36													TRUE	15965	1313.631315	657.3192955	1.179409	2	1396.23886588	52.45	1	30.4	21075389.3353475	31532445.3476321	0.668371548828519	21075389.3353475	31532445.3476321	1.49617379996611	FLNWAIDPK	ICPL (K); ICPL (N-term)
		B7JC36													TRUE	17961	1325.671583	663.3394295	0.254141	2	1576.0737143	49.71	1	22.1	19438578.5740178	12983824.8105839	0.667941061695658	19438578.5740178	12983824.8105839	1.49713808200587	FLNWAIDPK	ICPL:13C(6) (K); ICPL:13C(6) (N-term)
		B7JC36													TRUE	15962	1325.671583	663.3394295	1.197941	2	1395.74647495	60.14	1	52.5	31532445.3476321	21075389.3353475	0.668371548828519	31532445.3476321	21075389.3353475	1.49617379996611	FLNWAIDPK	ICPL:13C(6) (K); ICPL:13C(6) (N-term)
		B7JC36													TRUE	21469	1393.652845	697.3300605	1.152679	2	1896.77612054	65.55	1	75.2	28738392.0325332	49519939.3663212	0.580339806556354	28738392.0325332	49519939.3663212	1.72312839598897	TQPNAEVATAMR	ICPL (N-term)
		B7JC36													TRUE	21466	1399.672986	700.340131	0.186738	2	1896.55490455	50.31	1	78.3	49519939.3663212	28738392.0325332	0.580339806556354	49519939.3663212	28738392.0325332	1.72312839598897	TQPNAEVATAMR	ICPL:13C(6) (N-term)
		B7JC36													TRUE	19264	1409.647764	705.32752	0.12116	2	1709.42565204	37.71	1	32.1	7083012.08338459	14334228.6145597	0.494132769459961	7083012.08338459	14334228.6145597	2.02374758729906	TQPNAEVATAMR	ICPL (N-term); Oxidation (M)
		B7JC36													TRUE	21325	1409.647764	705.32752	0.14536	2	1888.99739573	56.9	1	59.7	14205927.719393	25402846.6895207	0.559225817996742	14205927.719393	25402846.6895207	1.78818639593966	TQPNAEVATAMR	ICPL (N-term); Oxidation (M)
		B7JC36													TRUE	19262	1415.667905	708.3375905	0.142219	2	1709.27846005	67.98	1	81.3	14334228.6145597	7083012.08338459	0.494132769459961	14334228.6145597	7083012.08338459	2.02374758729906	TQPNAEVATAMR	ICPL:13C(6) (N-term); Oxidation (M)
		B7JC36													TRUE	21322	1415.667905	708.3375905	0.164619	2	1888.85667093	62.74	1	93.5	25402846.6895207	14205927.719393	0.559225817996742	25402846.6895207	14205927.719393	1.78818639593966	TQPNAEVATAMR	ICPL:13C(6) (N-term); Oxidation (M)
		B7JC36													TRUE	9514	1427.658979	714.3331275	0.133145	2	844.70380002	47.92	1	32.5	5188452.48856572	6118143.78225023	0.848043568969121	5188452.48856572	6118143.78225023	1.17918469827629	ITNWDDAAIAK	ICPL (K); ICPL (N-term)
		B7JC36													TRUE	7920	1427.658979	714.3331275	0.202945	2	701.20378471	104.21	1	150.7	61291840.7530136	94568941.0184348	0.648118082881627	61291840.7530136	94568941.0184348	1.54292871378292	ITNWDDAAIAK	ICPL (K); ICPL (N-term)
		B7JC36													TRUE	10566	1439.699247	720.3532615	0.137677	2	935.21558006	56.03	1	22.3	5571916.10093079	8481804.90551223	1.52224203521215	5571916.10093079	8481804.90551223	0.65692575613354	ITNWDDAAIAK	ICPL:13C(6) (K); ICPL:13C(6) (N-term)
		B7JC36													TRUE	7918	1439.699247	720.3532615	0.162077	2	701.12708497	82.16	1	194.3	94568941.0184348	61291840.7530136	0.648118082881627	94568941.0184348	61291840.7530136	1.54292871378292	ITNWDDAAIAK	ICPL:13C(6) (K); ICPL:13C(6) (N-term)
		B7JC36													TRUE	9510	1439.699247	720.3532615	0.164477	2	844.37292535	74.7	1	44.8	6118143.78225023	5188452.48856572	0.848043568969121	6118143.78225023	5188452.48856572	1.17918469827629	ITNWDDAAIAK	ICPL:13C(6) (K); ICPL:13C(6) (N-term)
		B7JC36													TRUE	15883	1471.757978	736.382627	1.081546	2	1390.68530001	76.37	1	858.2	169759628.046659	237963743.125147	0.713384424943179	169759628.046659	237963743.125147	1.40176875894038	LSGPVLAGIYSGK	ICPL (K); ICPL (N-term)
		B7JC36													TRUE	15904	1471.757978	736.382627	1.118546	2	1392.64130748	65.54	1	22	8766107.03714478	6319776.80428358	1.38709123891892	8766107.03714478	6319776.80428358	0.72093310947547	LSGPVLAGIYSGK	ICPL (K); ICPL (N-term)
		B7JC36													TRUE	16838	1471.757978	736.382627	1.125146	2	1480.82775008	104.47	1	43.8	1781040.5112036	3062345.68027004	0.581593555122929	1781040.5112036	3062345.68027004	1.7194138263596	LSGPVLAGIYSGK	ICPL (K); ICPL (N-term)
		B7JC36													TRUE	16805	1471.757978	736.382627	1.156946	2	1478.23262475	88.17	1	50.4	2817392.62409027		100	2817392.62409027		0.01	LSGPVLAGIYSGK	ICPL (K); ICPL (N-term)
		B7JC36													TRUE	16860	1471.757978	736.382627	1.186746	2	1482.32460021	53.27	1	17	1495777.60027045		100	1495777.60027045		0.01	LSGPVLAGIYSGK	ICPL (K); ICPL (N-term)
		B7JC36													TRUE	15910	1483.798246	742.402761	0.145078	2	1393.33369947	57.13	1	20.3	6319776.80428358	8766107.03714478	1.38709123891892	6319776.80428358	8766107.03714478	0.72093310947547	LSGPVLAGIYSGK	ICPL:13C(6) (K); ICPL:13C(6) (N-term)
		B7JC36													TRUE	16834	1483.798246	742.402761	0.175878	2	1480.33657515	88.42	1	90.7	3062345.68027004	1781040.5112036	0.581593555122929	3062345.68027004	1781040.5112036	1.7194138263596	LSGPVLAGIYSGK	ICPL:13C(6) (K); ICPL:13C(6) (N-term)
		B7JC36													TRUE	16869	1483.798246	742.402761	0.187878	2	1482.93980022	70.54	1	18.3	1209191.76842429		0.01	1209191.76842429		100	LSGPVLAGIYSGK	ICPL:13C(6) (K); ICPL:13C(6) (N-term)
		B7JC36													TRUE	15882	1483.798246	742.402761	0.214878	2	1390.63131655	74.36	1	1677.2	237963743.125147	169759628.046659	0.713384424943179	237963743.125147	169759628.046659	1.40176875894038	LSGPVLAGIYSGK	ICPL:13C(6) (K); ICPL:13C(6) (N-term)
		B7JC36													TRUE	15950	1546.747739	773.8775075	1.115985	2	1395.07652454	44.08	1	50	31764176.2326116	56551924.4819162	0.561681614261756	31764176.2326116	56551924.4819162	1.78036804945867	KFLNWAIDPK	2 ICPL (K); ICPL (N-term)
		B7JC36													TRUE	15948	1564.808134	782.907705	0.09839	2	1395.06554108	54.29	1	97.1	56551924.4819162	31764176.2326116	0.561681614261756	56551924.4819162	31764176.2326116	1.78036804945867	KFLNWAIDPK	2 ICPL:13C(6) (K); ICPL:13C(6) (N-term)
TRUE	Chaperone protein DnaK	B7J7X9	1542.56	36.2776	82	39	0.59	0.02	39	1.76	0.05	410445125	6462.7		TRUE	5201	719.431089	360.2191825	0.093835	2	486.34830159	26.05	3	32.9	2669987.24783438	5386311.11246953	0.495698668733274	2669987.24783438	5386311.11246953	2.01735462101489	RLIGR	ICPL (N-term)
		B7J7X9													TRUE	5197	725.45123	363.229253	0.008494	2	486.11568507	22.09	2	56.4	5386311.11246953	2669987.24783438	0.495698668733274	5386311.11246953	2669987.24783438	2.01735462101489	RLIGR	ICPL:13C(6) (N-term)
		B7J7X9													TRUE	4321	777.425321	389.2162985	0.060003	2	406.57041976	33.7	1	93.3	51093657.0062666	83322661.7767734	0.613202409965607	51093657.0062666	83322661.7767734	1.6307828928071	ALIEAR	ICPL (N-term)
		B7J7X9													TRUE	4320	777.425321	777.425321	0.064179	1	406.45326136	28.62	1	3.6	51093657.0062666	83322661.7767734	0.613202409965607	51093657.0062666	83322661.7767734	1.6307828928071	ALIEAR	ICPL (N-term)
		B7J7X9													TRUE	4317	783.445463	392.2263695	0.043461	2	406.36149443	23.99	1	105.5	83322661.7767734	51093657.0062666	0.613202409965607	83322661.7767734	51093657.0062666	1.6307828928071	ALIEAR	ICPL:13C(6) (N-term)
		B7J7X9													TRUE	8680	783.445463	392.2263695	0.096261	2	770.58706008	26.71	2	37.4	24016171.6028527	12465092.9567219	0.519029142648249	24016171.6028527	12465092.9567219	1.92667408788972	ALIEAR	ICPL:13C(6) (N-term)
		B7J7X9													TRUE	19351	826.413236	826.413236	0.037764	1	1714.26622697	25.49	1	35.6	9963990.68569065	5218288.20714416	0.523714681371408	9963990.68569065	5218288.20714416	1.90943663710435	EQSIK	ICPL:13C(6) (K); ICPL:13C(6) (N-term)
		B7J7X9													TRUE	19354	826.413236	413.710256	0.134288	2	1714.37375177	32.57	1	49.9	9963990.68569065	5218288.20714416	0.523714681371408	9963990.68569065	5218288.20714416	1.90943663710435	EQSIK	ICPL:13C(6) (K); ICPL:13C(6) (N-term)
		B7J7X9													TRUE	5354	853.399137	427.2032065	0.046387	2	494.75458479	24.89	1	90.4	23361859.2562447	46427951.4771847	0.50318522598881	23361859.2562447	46427951.4771847	1.98733974757486	HVPYK	ICPL (K); ICPL (N-term)
		B7J7X9													TRUE	5356	865.439405	865.439405	0.025895	1	494.83185947	29.4	1	35.4	46427951.4771847	23361859.2562447	0.50318522598881	46427951.4771847	23361859.2562447	1.98733974757486	HVPYK	ICPL:13C(6) (K); ICPL:13C(6) (N-term)
		B7J7X9													TRUE	4537	899.492795	899.492795	0.046405	1	419.84737762	26.35	1	66.2	21496118.9354189	12570281.743662	0.584769826656947	21496118.9354189	12570281.743662	1.71007455312267	LKEAAEK	ICPL:13C(6) (K)
		B7J7X9													TRUE	10544	939.493421	939.493421	0.045179	1	933.36088033	29.68	1	87.9	30245913.9850602	50780048.1466541	0.595625941466405	30245913.9850602	50780048.1466541	1.67890605559933	IAGLEVK	ICPL (K); ICPL (N-term)
		B7J7X9													TRUE	10537	939.493421	470.2503485	0.053703	2	932.91111286	50.76	1	13.5	30245913.9850602	50780048.1466541	0.595625941466405	30245913.9850602	50780048.1466541	1.67890605559933	IAGLEVK	ICPL (K); ICPL (N-term)
		B7J7X9													TRUE	10577	951.533689	476.2704825	0.041835	2	935.38168032	20.81	5	31	7538352.71936701	2714898.00141515	0.36014472955613	7538352.71936701	2714898.00141515	2.7766614861544	IAGLEVK	ICPL:13C(6) (K); ICPL:13C(6) (N-term)
		B7J7X9													TRUE	10543	951.533689	951.533689	0.045711	1	933.4084382	25.74	1	143.1	50780048.1466541	30245913.9850602	0.595625941466405	50780048.1466541	30245913.9850602	1.67890605559933	IAGLEVK	ICPL:13C(6) (K); ICPL:13C(6) (N-term)
		B7J7X9													TRUE	11597	951.533689	476.2704825	0.102435	2	1023.11363501	51.9	1	12	2149578.41495778	1251718.5419021	0.582308853304469	2149578.41495778	1251718.5419021	1.71730172798375	IAGLEVK	ICPL:13C(6) (K); ICPL:13C(6) (N-term)
		B7J7X9													TRUE	20279	952.448255	476.7277655	0.064269	2	1798.37804887	69.2	1	22.6	6120644.76079561	10561876.3011598	0.579503545229317	6120644.76079561	10561876.3011598	1.72561498239719	DANLATSR	ICPL (N-term)
		B7J7X9													TRUE	19238	952.448255	476.7277655	1.055269	2	1708.00578537	67.68	1	32.1	15620816.3389196	25741307.5603047	0.606838494988044	15620816.3389196	25741307.5603047	1.6478849121457	DANLATSR	ICPL (N-term)
		B7J7X9													TRUE	19236	958.468397	479.7378365	0.049527	2	1708.18816884	51.43	1	105.3	25741307.5603047	15620816.3389196	0.606838494988044	25741307.5603047	15620816.3389196	1.6478849121457	DANLATSR	ICPL:13C(6) (N-term)
		B7J7X9													TRUE	21476	965.468656	483.237966	0.107468	2	1897.09551254	62.96	1	154	50086032.9791752	87064938.7613274	0.575272132407707	50086032.9791752	87064938.7613274	1.73830773935575	AESGIDLR	ICPL (N-term)
		B7J7X9													TRUE	21474	971.488798	486.248037	0.101726	2	1896.98929602	58.58	1	210.1	87064938.7613274	50086032.9791752	0.575272132407707	87064938.7613274	50086032.9791752	1.73830773935575	AESGIDLR	ICPL:13C(6) (N-term)
		B7J7X9													TRUE	19548	1070.478895	535.7430855	1.137629	2	1726.05336032	50.01	1	38.4	4945433.62215042	9834910.31995478	0.502844811112946	4945433.62215042	9834910.31995478	1.98868513286773	GEDVEAIK	ICPL (K); ICPL (N-term)
		B7J7X9													TRUE	20589	1082.519163	541.7632195	0.134161	2	1816.48770699	50.28	1	40.5	4599964.30879946	2707105.65367766	0.588505795251307	4599964.30879946	2707105.65367766	1.69921861104694	GEDVEAIK	ICPL:13C(6) (K); ICPL:13C(6) (N-term)
		B7J7X9													TRUE	19543	1082.519163	541.7632195	1.102361	2	1725.78077685	57.08	1	42.5	9834910.31995478	4945433.62215042	0.502844811112946	9834910.31995478	4945433.62215042	1.98868513286773	GEDVEAIK	ICPL:13C(6) (K); ICPL:13C(6) (N-term)
		B7J7X9													TRUE	5535	1086.463941	543.7356085	0.086183	2	504.9936184	55.51	1	73.5	37219705.8719098	55470864.8746509	0.670977565538527	37219705.8719098	55470864.8746509	1.49036279506216	DFFGQDPR	ICPL (N-term)
		B7J7X9													TRUE	5533	1086.463941	543.7356085	0.101383	2	504.57731812	45.42	1	129.5	37219705.8719098	55470864.8746509	0.670977565538527	37219705.8719098	55470864.8746509	1.49036279506216	DFFGQDPR	ICPL (N-term)
		B7J7X9													TRUE	19470	1085.489789	543.2485325	1.097335	2	1721.06705204	25.79	1	34.6	8403359.80168033	12715264.8538905	0.660887515772756	8403359.80168033	12715264.8538905	1.51311679542127	VIENSEGK	ICPL (K); ICPL (N-term)
		B7J7X9													TRUE	19462	1097.530057	549.2686665	1.104867	2	1720.67780192	59.32	1	50.1	12715264.8538905	8403359.80168033	0.660887515772756	12715264.8538905	8403359.80168033	1.51311679542127	VIENSEGK	ICPL:13C(6) (K); ICPL:13C(6) (N-term)
		B7J7X9													TRUE	3403	1103.515592	552.261434	0.146132	2	324.8027551	33.83	1	28.4	9383072.52672976	19014210.6468349	0.493476836930471	9383072.52672976	19014210.6468349	2.02643756537836	LKEAAEK	2 ICPL (K); ICPL (N-term)
		B7J7X9													TRUE	3398	1121.575986	561.291631	0.149338	2	324.87083029	27.01	1	15.4	19014210.6468349	9383072.52672976	0.493476836930471	19014210.6468349	9383072.52672976	2.02643756537836	LKEAAEK	2 ICPL:13C(6) (K); ICPL:13C(6) (N-term)
		B7J7X9													TRUE	20659	1161.484724	581.246	0.156	2	1821.28600726	40.08	1	35	2373825.62539859	5052806.89200749	0.469803354082954	2373825.62539859	5052806.89200749	2.12855015041768	FDDAEVQK	ICPL (K); ICPL (N-term)
		B7J7X9													TRUE	20651	1173.524991	587.2661335	0.213333	2	1820.818499	45.8	1	54.8	5052806.89200749	2373825.62539859	0.469803354082954	5052806.89200749	2373825.62539859	2.12855015041768	FDDAEVQK	ICPL:13C(6) (K); ICPL:13C(6) (N-term)
		B7J7X9													TRUE	18182	1231.545011	616.2761435	1.072313	2	1611.85388349	86.79	1	287.5	24685908.7247386	49226133.0810387	0.501479746217306	24685908.7247386	49226133.0810387	1.9940984806327	NEADASVHGAR	ICPL (N-term)
		B7J7X9													TRUE	11337	1232.626966	616.817121	0.152558	2	1007.38275182	77.87	1	11.4							FDLTDIANAPR
		B7J7X9													TRUE	21680	1235.521482	618.264379	0.193842	2	1909.56127895	54.19	1	81.4	24154790.9489385	41632281.8071638	0.580193779933101	24154790.9489385	41632281.8071638	1.72356208319797	TAEDYLGEK	ICPL (K); ICPL (N-term)
		B7J7X9													TRUE	18183	1237.565153	413.193235	-0.010905	3	1611.94146643	48.94	1	239.2	49226133.0810387	24685908.7247386	0.501479746217306	49226133.0810387	24685908.7247386	1.9940984806327	NEADASVHGAR	ICPL:13C(6) (N-term)
		B7J7X9													TRUE	18180	1237.565153	619.2862145	0.178171	2	1611.84204989	72.14	1	908.8	49226133.0810387	24685908.7247386	0.501479746217306	49226133.0810387	24685908.7247386	1.9940984806327	NEADASVHGAR	ICPL:13C(6) (N-term)
		B7J7X9													TRUE	91	1237.565153	619.2862145	0.620571	2	28.0706912	64.75	1	35.9	238649.179774141	100018.614485078	0.419103114369535	238649.179774141	100018.614485078	2.38604764725817	NEADASVHGAR	ICPL:13C(6) (N-term)
		B7J7X9													TRUE	20385	1241.590894	621.299085	1.18443	2	1804.60663232	31.46	1	45.9	21662831.7129607	33746653.0864958	0.641925338712461	21662831.7129607	33746653.0864958	1.55781356443375	VIENSEGKR	ICPL (K); ICPL (N-term)
		B7J7X9													TRUE	20635	1247.56175	624.284513	0.164974	2	1819.90440725	54.71	1	85.4	13446911.1798461	7510036.90674196	0.558495315860927	13446911.1798461	7510036.90674196	1.79052531256863	TAEDYLGEK	ICPL:13C(6) (K); ICPL:13C(6) (N-term)
		B7J7X9													TRUE	21677	1247.56175	624.284513	0.172774	2	1909.43147094	54.82	1	118.3	41632281.8071638	24154790.9489385	0.580193779933101	41632281.8071638	24154790.9489385	1.72356208319797	TAEDYLGEK	ICPL:13C(6) (K); ICPL:13C(6) (N-term)
		B7J7X9													TRUE	20382	1253.631162	627.319219	1.186962	2	1804.49389047	33.87	1	52.5	33746653.0864958	21662831.7129607	0.641925338712461	33746653.0864958	21662831.7129607	1.55781356443375	VIENSEGKR	ICPL:13C(6) (K); ICPL:13C(6) (N-term)
		B7J7X9													TRUE	13316	1257.716138	629.361707	0.142186	2	1179.51126977	82.69	1	31.5							ITDVILVGGQSR
		B7J7X9													TRUE	14356	1257.716138	629.361707	1.133986	2	1269.69076452	26.52	1	10.9							ITDVILVGGQSR
		B7J7X9													TRUE	20558	1336.591642	668.799459	0.189882	2	1814.36886592	50.35	1	77.1	12691406.34794	18738018.5243303	0.677307813067904	12691406.34794	18738018.5243303	1.47643358116665	ADNGDAWVEVR	ICPL (N-term)
		B7J7X9													TRUE	12609	1337.64842	669.327848	0.153704	2	1109.92501733	69.18	1	217.3	80842446.5192707	101430084.123509	0.797026318353742	80842446.5192707	101430084.123509	1.25466371306973	FDLTDIANAPR	ICPL (N-term)
		B7J7X9													TRUE	12607	1337.64842	669.327848	0.165504	2	1109.80127547	85.21	1	160.1	80842446.5192707	101430084.123509	0.797026318353742	80842446.5192707	101430084.123509	1.25466371306973	FDLTDIANAPR	ICPL (N-term)
		B7J7X9													TRUE	13660	1337.64842	669.327848	0.224904	2	1200.03411083	74.65	1	56.3	9885168.63912138	12230484.6583701	0.808240140537383	9885168.63912138	12230484.6583701	1.23725604538166	FDLTDIANAPR	ICPL (N-term)
		B7J7X9													TRUE	19537	1342.611783	671.8095295	1.160141	2	1725.33477684	29.17	1	77.1	12845375.8105438	8130937.46100173	0.632985564682946	12845375.8105438	8130937.46100173	1.57981485802269	ADNGDAWVEVR	ICPL:13C(6) (N-term)
		B7J7X9													TRUE	20554	1342.611783	671.8095295	1.162341	2	1814.2890158	55.89	1	73.3	18738018.5243303	12691406.34794	0.677307813067904	18738018.5243303	12691406.34794	1.47643358116665	ADNGDAWVEVR	ICPL:13C(6) (N-term)
		B7J7X9													TRUE	13659	1343.668561	672.3379185	0.207763	2	1200.02121963	50.59	1	85.8	12230484.6583701	9885168.63912138	0.808240140537383	12230484.6583701	9885168.63912138	1.23725604538166	FDLTDIANAPR	ICPL:13C(6) (N-term)
		B7J7X9													TRUE	14702	1368.757734	684.882505	0.24759	2	1289.19663918	54.22	1	255.8	61154959.1690205	44480370.9534927	0.727338740110308	61154959.1690205	44480370.9534927	1.37487520580622	ITDVILVGGQSR	ICPL:13C(6) (N-term)
		B7J7X9													TRUE	13888	1379.663007	690.3351415	1.096917	2	1215.28895296	72.12	1	47.1	21928079.3952763	32411098.2723991	0.676560825276012	21928079.3952763	32411098.2723991	1.47806370490345	VINYLADSFK	ICPL (K); ICPL (N-term)
		B7J7X9													TRUE	14940	1379.663007	690.3351415	1.142317	2	1305.11537251	77.4	1	78.8	49113953.4261144	67538353.7474102	0.727200926599396	49113953.4261144	67538353.7474102	1.3751357615512	VINYLADSFK	ICPL (K); ICPL (N-term)
		B7J7X9													TRUE	13885	1391.703275	696.3552755	0.113849	2	1215.17751137	66.85	1	76.7	32411098.2723991	21928079.3952763	0.676560825276012	32411098.2723991	21928079.3952763	1.47806370490345	VINYLADSFK	ICPL:13C(6) (K); ICPL:13C(6) (N-term)
		B7J7X9													TRUE	14938	1391.703275	696.3552755	0.176449	2	1305.10442264	72.69	1	169.3	67538353.7474102	49113953.4261144	0.727200926599396	67538353.7474102	49113953.4261144	1.3751357615512	VINYLADSFK	ICPL:13C(6) (K); ICPL:13C(6) (N-term)
		B7J7X9													TRUE	21687	1394.601148	697.804212	0.130376	2	1909.96162135	54.72	1	59.5	12170838.9971064	24413673.3738847	0.498525511123024	12170838.9971064	24413673.3738847	2.00591539989059	KFDDAEVQK	2 ICPL (K); ICPL (N-term)
		B7J7X9													TRUE	20641	1394.601148	697.804212	0.138776	2	1820.07148247	58.05	1	67.1	10017514.0458475	21641844.6966983	0.462877087708504	10017514.0458475	21641844.6966983	2.16040073391956	KFDDAEVQK	2 ICPL (K); ICPL (N-term)
		B7J7X9													TRUE	20647	1394.601148	465.538566666667	1.0972	3	1820.42712406	34.83	1	12.5	10017514.0458475	21641844.6966983	0.462877087708504	10017514.0458475	21641844.6966983	2.16040073391956	KFDDAEVQK	2 ICPL (K); ICPL (N-term)
		B7J7X9													TRUE	20644	1412.661542	471.558698	0.970806	3	1820.22827393	39.2	1	24.6	21641844.6966983	10017514.0458475	0.462877087708504	21641844.6966983	10017514.0458475	2.16040073391956	KFDDAEVQK	2 ICPL:13C(6) (K); ICPL:13C(6) (N-term)
		B7J7X9													TRUE	20639	1412.661542	706.834409	1.142982	2	1819.91824087	65.62	1	69.3	21641844.6966983	10017514.0458475	0.462877087708504	21641844.6966983	10017514.0458475	2.16040073391956	KFDDAEVQK	2 ICPL:13C(6) (K); ICPL:13C(6) (N-term)
		B7J7X9													TRUE	21684	1412.661542	706.834409	1.148782	2	1909.83089601	62.48	1	87.6	24413673.3738847	12170838.9971064	0.498525511123024	24413673.3738847	12170838.9971064	2.00591539989059	KFDDAEVQK	2 ICPL:13C(6) (K); ICPL:13C(6) (N-term)
		B7J7X9													TRUE	11512	1418.648786	473.554446	0.075162	3	1017.72199288	25.6	1	19.9	12362059.1455656	20436069.1108647	0.604913747281926	12362059.1455656	20436069.1108647	1.65312824265166	VKDFFGQDPR	ICPL (K); ICPL (N-term)
		B7J7X9													TRUE	11511	1418.648786	709.828031	0.126938	2	1017.56141847	53.97	1	79.6	12362059.1455656	20436069.1108647	0.604913747281926	12362059.1455656	20436069.1108647	1.65312824265166	VKDFFGQDPR	ICPL (K); ICPL (N-term)
		B7J7X9													TRUE	11508	1430.689054	715.848165	0.11667	2	1017.32805155	45.26	1	120.9	20436069.1108647	12362059.1455656	0.604913747281926	20436069.1108647	12362059.1455656	1.65312824265166	VKDFFGQDPR	ICPL:13C(6) (K); ICPL:13C(6) (N-term)
		B7J7X9													TRUE	12783	1512.732862	756.870069	0.152062	2	1120.85412507	97.04	1	87	23669395.7175626	37395496.3493366	0.632947761849471	23669395.7175626	37395496.3493366	1.57990921253597	VTEAISAVENAAK	ICPL (K); ICPL (N-term)
		B7J7X9													TRUE	12779	1524.77313	762.890203	0.147994	2	1120.57627546	56.24	1	50.9	37395496.3493366	23669395.7175626	0.632947761849471	37395496.3493366	23669395.7175626	1.57990921253597	VTEAISAVENAAK	ICPL:13C(6) (K); ICPL:13C(6) (N-term)
		B7J7X9													TRUE	14870	1524.77313	762.890203	1.155194	2	1300.24087225	56.36	1	29.8	4661223.24124446	3929965.63273933	0.843118947396757	4661223.24124446	3929965.63273933	1.18607226547053	VTEAISAVENAAK	ICPL:13C(6) (K); ICPL:13C(6) (N-term)
		B7J7X9													TRUE	3498	1585.778272	793.392774	0.096052	2	331.19127189	34.57	1	32.2	2178265.32148999	1356587.74877832	0.62278352200474	2178265.32148999	1356587.74877832	1.60569437800955	ITASSGLSEEEIK	ICPL:13C(6) (K); ICPL:13C(6) (N-term)
		B7J7X9													TRUE	4444	1729.839109	577.284553666667	0.166339	3	413.9213611	40.17	1	24.1	17259686.3382355	32912466.4460713	0.524411817221791	17259686.3382355	32912466.4460713	1.90689829473669	ITASSGLSEEEIKR	ICPL (K); ICPL (N-term)
		B7J7X9													TRUE	4441	1741.879377	581.297976333333	0.138371	3	413.83186137	41.19	1	67.6	32912466.4460713	17259686.3382355	0.524411817221791	32912466.4460713	17259686.3382355	1.90689829473669	ITASSGLSEEEIKR	ICPL:13C(6) (K); ICPL:13C(6) (N-term)
		B7J7X9													TRUE	3441	1801.839139	901.4232075	0.101985	2	327.20324682	73.83	1	64.8	18442124.0902668	31842080.5630235	0.5791745942532	18442124.0902668	31842080.5630235	1.72659507154215	QAVTNPENTVYEVK	ICPL (K); ICPL (N-term)
		B7J7X9													TRUE	3440	1813.879407	907.4433415	0.069717	2	327.06789697	74.71	1	64.4	31842080.5630235	18442124.0902668	0.5791745942532	31842080.5630235	18442124.0902668	1.72659507154215	QAVTNPENTVYEVK	ICPL:13C(6) (K); ICPL:13C(6) (N-term)
		B7J7X9													TRUE	19358	1864.874692	622.296414666667	0.212356	3	1714.60345152	42.52	1	71.2	11736148.2606738	5612016.20689966	0.478182115822849	11736148.2606738	5612016.20689966	2.09125345116518	KAVEEHAAAPEHDK	2 ICPL:13C(6) (K); ICPL:13C(6) (N-term)
TRUE	Elongation factor Tu	B7J452	1435.96	50	70	28	0.67	0.02	28	1.54	0.05	493395077	6680.6		TRUE	6581	727.377332	727.377332	0.070668	1	593.43982449	23.71	1	83.8	18702511.503467	27759145.5945776	0.673742332585349	18702511.503467	27759145.5945776	1.48424694669653	VLSAK	ICPL (K); ICPL (N-term)
		B7J452													TRUE	6574	739.4176	739.4176	0.0853	1	593.08049169	26.64	1	77.7	27759145.5945776	18702511.503467	0.673742332585349	27759145.5945776	18702511.503467	1.48424694669653	VLSAK	ICPL:13C(6) (K); ICPL:13C(6) (N-term)
		B7J452													TRUE	4344	783.3784	392.192838	0.049524	2	407.85586937	35.67	1	129.4	68375259.4489071	100128151.695635	0.682877475425201	68375259.4489071	100128151.695635	1.46439154312029	FGGEIR	ICPL (N-term)
		B7J452													TRUE	5408	783.3784	783.3784	0.0614	1	497.61215119	27.48	1	60.4	20129268.2929868	33810460.7437407	0.595356225564399	20129268.2929868	33810460.7437407	1.67966665512231	FGGEIR	ICPL (N-term)
		B7J452													TRUE	5407	783.3784	392.192838	0.061524	2	497.64668452	41.71	1	22.7	20129268.2929868	33810460.7437407	0.595356225564399	20129268.2929868	33810460.7437407	1.67966665512231	FGGEIR	ICPL (N-term)
		B7J452													TRUE	5402	789.398542	395.202909	0.048182	2	497.40603493	24.89	1	50.9	33810460.7437407	20129268.2929868	0.595356225564399	33810460.7437407	20129268.2929868	1.67966665512231	FGGEIR	ICPL:13C(6) (N-term)
		B7J452													TRUE	4342	789.398542	789.398542	0.087658	1	407.66100269	23.08	1	98.8	100128151.695635	68375259.4489071	0.682877475425201	100128151.695635	68375259.4489071	1.46439154312029	FGGEIR	ICPL:13C(6) (N-term)
		B7J452													TRUE	4341	789.398542	395.202909	0.087782	2	407.65006935	28.59	1	123.3	100128151.695635	68375259.4489071	0.682877475425201	100128151.695635	68375259.4489071	1.46439154312029	FGGEIR	ICPL:13C(6) (N-term)
		B7J452													TRUE	5617	799.39845	799.39845	0.06045	1	509.75914319	29.14	1	85.6	32393374.9364624	50726002.1955846	0.638595070267179	32393374.9364624	50726002.1955846	1.56593755035036	ELLSK	ICPL (K); ICPL (N-term)
		B7J452													TRUE	5618	799.39845	400.202863	0.060474	2	509.77162639	35.16	1	38.2	32393374.9364624	50726002.1955846	0.638595070267179	32393374.9364624	50726002.1955846	1.56593755035036	ELLSK	ICPL (K); ICPL (N-term)
		B7J452													TRUE	5614	811.438718	406.222997	0.020006	2	509.52355172	35.04	1	50.9	50726002.1955846	32393374.9364624	0.638595070267179	50726002.1955846	32393374.9364624	1.56593755035036	ELLSK	ICPL:13C(6) (K); ICPL:13C(6) (N-term)
		B7J452													TRUE	5632	811.438718	406.222997	0.027806	2	510.67679333	22.9	1	79.7	50726002.1955846		0.01	50726002.1955846		100	ELLSK	ICPL:13C(6) (K); ICPL:13C(6) (N-term)
		B7J452													TRUE	5159	851.509733	851.509733	0.037767	1	483.99077679	37.76	1	70.5							EHILLAR
		B7J452													TRUE	5156	851.509733	426.2585045	0.075991	2	483.86196773	42.58	1	252.2							EHILLAR
		B7J452													TRUE	3142	858.429563	429.7184195	0.039361	2	310.64261322	27.01	1	121.1	45736348.5611605	20918067.1413798	0.457361984492647	45736348.5611605	20918067.1413798	2.18645194376901	GKFER	ICPL:13C(6) (K); ICPL:13C(6) (N-term)
		B7J452													TRUE	10189	956.531187	956.531187	0.031413	1	911.17966327	37.11	1	1.6	50278278.640778	83817597.6158463	0.599853492236964	50278278.640778	83817597.6158463	1.66707373207217	EHILLAR	ICPL (N-term)
		B7J452													TRUE	11210	956.531187	478.7692315	0.069337	2	1000.19401794	44.23	1	146.4	10703414.6557313	16809173.1662813	0.636760330198873	10703414.6557313	16809173.1662813	1.57044959080237	EHILLAR	ICPL (N-term)
		B7J452													TRUE	10186	956.531187	478.7692315	0.076537	2	911.04321367	43.42	1	308.4	50278278.640778	83817597.6158463	0.599853492236964	50278278.640778	83817597.6158463	1.66707373207217	EHILLAR	ICPL (N-term)
		B7J452													TRUE	11207	956.531187	478.7692315	0.091337	2	1000.06035182	31.49	1	8.5	10703414.6557313	16809173.1662813	0.636760330198873	10703414.6557313	16809173.1662813	1.57044959080237	EHILLAR	ICPL (N-term)
		B7J452													TRUE	10184	962.551328	481.779302	0.038396	2	910.92018005	44.09	1	339.7	83817597.6158463	50278278.640778	0.599853492236964	83817597.6158463	50278278.640778	1.66707373207217	EHILLAR	ICPL:13C(6) (N-term)
		B7J452													TRUE	10187	962.551328	962.551328	0.039472	1	911.0568718	33.92	1	86.5	83817597.6158463	50278278.640778	0.599853492236964	83817597.6158463	50278278.640778	1.66707373207217	EHILLAR	ICPL:13C(6) (N-term)
		B7J452													TRUE	18316	971.42172	486.214498	1.088004	2	1620.49479977	35.73	1	84.6	14531882.5721772	29369750.8235388	0.494790802260755	14531882.5721772	29369750.8235388	2.02105616238395	KDDVER	ICPL (K); ICPL (N-term)
		B7J452													TRUE	18318	983.461988	492.234632	0.077336	2	1620.60961683	35.99	1	417	29369750.8235388	14531882.5721772	0.494790802260755	29369750.8235388	14531882.5721772	2.02105616238395	KDDVER	ICPL:13C(6) (K); ICPL:13C(6) (N-term)
		B7J452													TRUE	6535	1027.520734	514.264005	0.12579	2	591.33524956	54.36	1	49.4	59503983.6458546	85963890.8379087	0.692197422264818	59503983.6458546	85963890.8379087	1.44467455069115	TVGAGVVSK	ICPL (K); ICPL (N-term)
		B7J452													TRUE	6536	1039.561002	520.284139	0.145522	2	591.13090023	77.05	1	139.9	85963890.8379087	59503983.6458546	0.692197422264818	85963890.8379087	59503983.6458546	1.44467455069115	TVGAGVVSK	ICPL:13C(6) (K); ICPL:13C(6) (N-term)
		B7J452													TRUE	12608	1129.588788	565.298032	0.097936	2	1109.82519226	77.25	1	72.1	12292161.3832162	19384297.0910368	0.634129848788793	12292161.3832162	19384297.0910368	1.57696409009926	TTLTAALTK	ICPL (K); ICPL (N-term)
		B7J452													TRUE	12604	1141.629056	571.318166	0.095268	2	1109.6705336	64.39	1	119.3	19384297.0910368	12292161.3832162	0.634129848788793	19384297.0910368	12292161.3832162	1.57696409009926	TTLTAALTK	ICPL:13C(6) (K); ICPL:13C(6) (N-term)
		B7J452													TRUE	11544	1141.629056	571.318166	0.168268	2	1019.43669314	77.68	1	33.8	15076284.6911849	10557989.0384911	0.700304435393448	15076284.6911849	10557989.0384911	1.42795040193937	TTLTAALTK	ICPL:13C(6) (K); ICPL:13C(6) (N-term)
		B7J452													TRUE	14706	1243.613965	622.3106205	1.171359	2	1289.33298103	74.83	1	41.5	12344766.4807942	16412668.3779842	0.752148657152751	12344766.4807942	16412668.3779842	1.32952441048753	SIVTGVEMFR	ICPL (N-term)
		B7J452													TRUE	14705	1249.634107	625.3206915	0.191617	2	1289.32118104	61.67	1	101.9	16412668.3779842	12344766.4807942	0.752148657152751	16412668.3779842	12344766.4807942	1.32952441048753	SIVTGVEMFR	ICPL:13C(6) (N-term)
		B7J452													TRUE	286	1525.655332	763.331304	0.174392	2	42.85775787	76.15	1	83.3	3591063.76901917	5200319.4291105	0.690546766976852	3591063.76901917	5200319.4291105	1.44812784277871	AYDQIDNAPEER	ICPL (N-term)
		B7J452													TRUE	18407	1525.655332	763.331304	1.109392	2	1626.77458322	62.94	1	635.3	100701540.368622	152777276.813223	0.659139516485387	100701540.368622	152777276.813223	1.51712949229948	AYDQIDNAPEER	ICPL (N-term)
		B7J452													TRUE	283	1531.675474	766.341375	0.09245	2	42.742208	70.85	1	92.8	5200319.4291105	3591063.76901917	0.690546766976852	5200319.4291105	3591063.76901917	1.44812784277871	AYDQIDNAPEER	ICPL:13C(6) (N-term)
		B7J452													TRUE	18522	1531.675474	766.341375	0.12325	2	1635.5698915	26.82	1	16.7	343662.117980938	245745.755384517	0.715079557875938	343662.117980938	245745.755384517	1.39844579387836	AYDQIDNAPEER	ICPL:13C(6) (N-term)
		B7J452													TRUE	18405	1531.675474	766.341375	0.21525	2	1626.6947667	56.04	1	1090.4	152777276.813223	100701540.368622	0.659139516485387	152777276.813223	100701540.368622	1.51712949229948	AYDQIDNAPEER	ICPL:13C(6) (N-term)
		B7J452													TRUE	15866	1603.851194	802.429235	0.21073	2	1388.70516615	46.62	1	60.9	8259147.69297867	9132749.24314415	0.904344077899514	8259147.69297867	9132749.24314415	1.10577381379293	VALIAPIAMEEGLR	ICPL (N-term); Oxidation (M)
		B7J452													TRUE	13790	1603.851194	802.429235	1.12993	2	1208.94761963	59.38	1	39.2	4425060.54864137	6082645.89426994	0.727489422458395	4425060.54864137	6082645.89426994	1.37459043269758	VALIAPIAMEEGLR	ICPL (N-term); Oxidation (M)
		B7J452													TRUE	13789	1609.871335	805.4393055	0.145189	2	1208.77886122	33.16	1	49.9	6082645.89426994	4425060.54864137	0.727489422458395	6082645.89426994	4425060.54864137	1.37459043269758	VALIAPIAMEEGLR	ICPL:13C(6) (N-term); Oxidation (M)
		B7J452													TRUE	15864	1609.871335	805.4393055	0.192989	2	1388.69149948	37.67	1	72	9132749.24314415	8259147.69297867	0.904344077899514	9132749.24314415	8259147.69297867	1.10577381379293	VALIAPIAMEEGLR	ICPL:13C(6) (N-term); Oxidation (M)
		B7J452													TRUE	12615	1772.928968	886.968122	0.032756	2	1110.19466693	104.48	1	70.9	22110281.6879922	30188905.9160648	0.732397581729731	22110281.6879922	30188905.9160648	1.36537862077352	ILDQGQAGDNVGVLLR	ICPL (N-term)
		B7J452													TRUE	12617	1772.928968	591.64784	0.04008	3	1110.33056719	78.01	1	2.9	22110281.6879922	30188905.9160648	0.732397581729731	22110281.6879922	30188905.9160648	1.36537862077352	ILDQGQAGDNVGVLLR	ICPL (N-term)
		B7J452													TRUE	12614	1772.928968	886.968122	0.048956	2	1110.40460879	89.06	1	104.3	22110281.6879922	30188905.9160648	0.732397581729731	22110281.6879922	30188905.9160648	1.36537862077352	ILDQGQAGDNVGVLLR	ICPL (N-term)
		B7J452													TRUE	13664	1772.928968	886.968122	1.061356	2	1200.3184111	68.43	1	30.2	6996208.67934263	9421837.79054043	0.742552444106696	6996208.67934263	9421837.79054043	1.34670622652521	ILDQGQAGDNVGVLLR	ICPL (N-term)
		B7J452													TRUE	13662	1778.949109	889.9781925	0.068815	2	1200.16232789	50.27	1	61.9	9421837.79054043	6996208.67934263	0.742552444106696	9421837.79054043	6996208.67934263	1.34670622652521	ILDQGQAGDNVGVLLR	ICPL:13C(6) (N-term)
		B7J452													TRUE	4579	1822.860593	911.9339345	0.119131	2	422.44672803	77.95	1	101	17606049.5643114	22463561.1276457	0.783760395970515	17606049.5643114	22463561.1276457	1.27590014134577	ALEGDQSDIGEPAIFR	ICPL (N-term)
		B7J452													TRUE	4580	1822.860593	911.9339345	0.125531	2	422.3545611	75.14	1	73.7	17606049.5643114	22463561.1276457	0.783760395970515	17606049.5643114	22463561.1276457	1.27590014134577	ALEGDQSDIGEPAIFR	ICPL (N-term)
		B7J452													TRUE	4581	1822.860593	608.291715	0.133155	3	422.46075257	53.85	1	65	17606049.5643114	22463561.1276457	0.783760395970515	17606049.5643114	22463561.1276457	1.27590014134577	ALEGDQSDIGEPAIFR	ICPL (N-term)
		B7J452													TRUE	10533	1832.917707	916.9624915	0.057817	2	932.44497953	63.48	1	23	8385007.41222985	10840162.5458175	0.773513070195155	8385007.41222985	10840162.5458175	1.29280297713354	IGDEIEIIGIHNTAK	ICPL (K); ICPL (N-term)
		B7J452													TRUE	10527	1844.957975	922.9826255	0.139949	2	932.09457207	88.93	1	37	10840162.5458175	8385007.41222985	0.773513070195155	10840162.5458175	8385007.41222985	1.29280297713354	IGDEIEIIGIHNTAK	ICPL:13C(6) (K); ICPL:13C(6) (N-term)
		B7J452													TRUE	10529	1844.957975	615.657509	0.261873	3	932.25862166	38.01	1	42.8	10840162.5458175	8385007.41222985	0.773513070195155	10840162.5458175	8385007.41222985	1.29280297713354	IGDEIEIIGIHNTAK	ICPL:13C(6) (K); ICPL:13C(6) (N-term)
		B7J452													TRUE	7563	1866.898038	933.952657	0.151886	2	679.64649298	64.33	1	38.2	26131678.0196832	32854657.522471	0.795372102168782	26131678.0196832	32854657.522471	1.25727316469015	GITIATSHVEYETANR	ICPL (N-term)
		B7J452													TRUE	7562	1866.898038	933.952657	0.160886	2	679.57023483	84.87	1	50.2	26131678.0196832	32854657.522471	0.795372102168782	26131678.0196832	32854657.522471	1.25727316469015	GITIATSHVEYETANR	ICPL (N-term)
		B7J452													TRUE	7560	1866.898038	622.970863333333	0.17711	3	679.52879272	60.95	1	5.4	26131678.0196832	32854657.522471	0.795372102168782	26131678.0196832	32854657.522471	1.25727316469015	GITIATSHVEYETANR	ICPL (N-term)
		B7J452													TRUE	2238	1866.898038	622.970863333333	0.21341	3	229.33227018	48.87	1	2.2	496920.433788278	753548.277016258	0.659440740486965	496920.433788278	753548.277016258	1.51643648716873	GITIATSHVEYETANR	ICPL (N-term)
		B7J452													TRUE	375	1866.898038	622.970863333333	0.23891	3	49.30053279	31.66	1	15	348715.761152474	513198.778985506	0.679494526159662	348715.761152474	513198.778985506	1.47168220125592	GITIATSHVEYETANR	ICPL (N-term)
		B7J452													TRUE	1300	1866.898038	622.970863333333	0.29021	3	139.44384788	43.44	1	15.6	646002.515239521	1039236.23866074	0.62161276830764	646002.515239521	1039236.23866074	1.60871856400655	GITIATSHVEYETANR	ICPL (N-term)
		B7J452													TRUE	20323	2077.201551	693.072034333333	0.830297	3	1801.15064087	23.72	1	52.6							TTLTAALTKVLSAKFGGEIR
		B7J452													TRUE	17618	2087.997068	696.67054	-0.19542	3	1555.46348123	34.72	1	3.3	53191870.4333839	24236715.0620242	0.455646978843837	53191870.4333839	24236715.0620242	2.19468151097459	HTPFFNGYRPQFYFR	ICPL:13C(6) (N-term)
		B7J452													TRUE	17603	2087.997068	696.67054	0.19038	3	1554.85112283	29.85	1	11.3	53191870.4333839	24236715.0620242	0.455646978843837	53191870.4333839	24236715.0620242	2.19468151097459	HTPFFNGYRPQFYFR	ICPL:13C(6) (N-term)
		B7J452													TRUE	10196	2111.020612	704.345054666667	0.265636	3	911.69101367	87.63	1	53	8778698.43267422	15605997.2505141	0.56252082399829	8778698.43267422	15605997.2505141	1.7777119660961	TKPHVNVGTIGHVDHGK	2 ICPL (K); ICPL (N-term)
		B7J452													TRUE	11223	2129.081006	710.365186	0.181242	3	1000.80572675	68.18	1	31.3	3696719.95117203	2194063.56382157	0.593516304400053	3696719.95117203	2194063.56382157	1.68487368011033	TKPHVNVGTIGHVDHGK	2 ICPL:13C(6) (K); ICPL:13C(6) (N-term)
		B7J452													TRUE	10195	2129.081006	710.365186	0.224442	3	911.53726326	106.23	1	61.6	15605997.2505141	8778698.43267422	0.56252082399829	15605997.2505141	8778698.43267422	1.7777119660961	TKPHVNVGTIGHVDHGK	2 ICPL:13C(6) (K); ICPL:13C(6) (N-term)
TRUE	Pyridine nucleotide-disulfide oxidoreductase	B7J7R8	1369.68	65.6992	111	44	0.18	0.02	45	7.81	0.7	558918229	10627		TRUE	6698	755.372251	755.372251	0.024049	1	601.68054982	24.01	1	3.8	9643327.78146974	104958020.703958	0.0918779500298452	9643327.78146974	104958020.703958	10.884004265171	GLLDK	ICPL (K); ICPL (N-term)
		B7J7R8													TRUE	6692	767.412519	384.2098975	-0.003595	2	601.3123413	35.47	1	141.6	104958020.703958	9643327.78146974	0.0918779500298452	104958020.703958	9643327.78146974	10.884004265171	GLLDK	ICPL:13C(6) (K); ICPL:13C(6) (N-term)
		B7J7R8													TRUE	6687	767.412519	767.412519	0.004081	1	600.89915836	30.64	1	534.1	104958020.703958	9643327.78146974	0.0918779500298452	104958020.703958	9643327.78146974	10.884004265171	GLLDK	ICPL:13C(6) (K); ICPL:13C(6) (N-term)
		B7J7R8													TRUE	18353	769.355405	769.355405	0.020495	1	1622.79841629	25.75	1	105.7	27307595.6154866	2219699.32045424	0.0812850516650912	27307595.6154866	2219699.32045424	12.3023849959544	EVDGK	ICPL:13C(6) (K); ICPL:13C(6) (N-term)
		B7J7R8													TRUE	18333	769.355405	769.355405	0.065495	1	1621.56107497	25.6	1	126.9	27307595.6154866	2219699.32045424	0.0812850516650912	27307595.6154866	2219699.32045424	12.3023849959544	EVDGK	ICPL:13C(6) (K); ICPL:13C(6) (N-term)
		B7J7R8													TRUE	227	769.355405	769.355405	0.074095	1	38.36943306	27.27	1	42.8	343668.052458375		0.01	343668.052458375		100	EVDGK	ICPL:13C(6) (K); ICPL:13C(6) (N-term)
		B7J7R8													TRUE	18339	769.355405	385.1813405	0.989519	2	1621.84334963	28.92	1	22.4	27307595.6154866	2219699.32045424	0.0812850516650912	27307595.6154866	2219699.32045424	12.3023849959544	EVDGK	ICPL:13C(6) (K); ICPL:13C(6) (N-term)
		B7J7R8													TRUE	7775	947.425748	947.425748	0.107252	1	691.41588497	28.18	1	15	11439026.2679432	107575272.89978	0.106335089464287	11439026.2679432	107575272.89978	9.40423340063913	QLSDFK	ICPL (K); ICPL (N-term)
		B7J7R8													TRUE	7776	947.425748	474.216512	0.137576	2	691.51206792	29.23	1	33.2	11439026.2679432	107575272.89978	0.106335089464287	11439026.2679432	107575272.89978	9.40423340063913	QLSDFK	ICPL (K); ICPL (N-term)
		B7J7R8													TRUE	7770	959.466016	480.236646	0.068308	2	691.06959271	27.98	1	2.7	107575272.89978	11439026.2679432	0.106335089464287	107575272.89978	11439026.2679432	9.40423340063913	QLSDFK	ICPL:13C(6) (K); ICPL:13C(6) (N-term)
		B7J7R8													TRUE	7771	959.466016	959.466016	0.069084	1	691.14472657	25.69	1	76.8	107575272.89978	11439026.2679432	0.106335089464287	107575272.89978	11439026.2679432	9.40423340063913	QLSDFK	ICPL:13C(6) (K); ICPL:13C(6) (N-term)
		B7J7R8													TRUE	20527	1012.473417	506.7403465	1.060507	2	1812.64898273	32.98	1	38.2	13265994.9884637	137774183.769393	0.0962879592207814	13265994.9884637	137774183.769393	10.3855145346582	GQEVIEK	ICPL (K); ICPL (N-term)
		B7J7R8													TRUE	4152	1016.480939	508.7441075	0.086385	2	397.32760269	32.53	1	67.1	11266667.9486804	1318776.33348361	0.117051140540453	11266667.9486804	1318776.33348361	8.5432742934649	IHHEMK	ICPL:13C(6) (K); ICPL:13C(6) (N-term)
		B7J7R8													TRUE	20521	1024.513685	512.7604805	0.120639	2	1812.30699873	51.54	1	172	137774183.769393	13265994.9884637	0.0962879592207814	137774183.769393	13265994.9884637	10.3855145346582	GQEVIEK	ICPL:13C(6) (K); ICPL:13C(6) (N-term)
		B7J7R8													TRUE	21566	1024.513685	512.7604805	0.124839	2	1902.09110453	26.41	1	48.6	11506765.7285307	2663539.00719441	0.231475904701026	11506765.7285307	2663539.00719441	4.320104078615	GQEVIEK	ICPL:13C(6) (K); ICPL:13C(6) (N-term)
		B7J7R8													TRUE	19489	1024.513685	512.7604805	1.175039	2	1722.10094324	55.38	1	37.2	10052225.0019288		0.01	10052225.0019288		100	GQEVIEK	ICPL:13C(6) (K); ICPL:13C(6) (N-term)
		B7J7R8													TRUE	4077	1032.475858	516.741567	0.079666	2	393.12618617	23.34	1	98.8	8529369.91467926	870354.733720645	0.102042090145808	8529369.91467926	870354.733720645	9.79987766392376	IHHEMK	ICPL:13C(6) (K); ICPL:13C(6) (N-term); Oxidation (M)
		B7J7R8													TRUE	21508	1035.510541	518.2589085	0.016783	2	1898.75203735	37.93	1	134.4	42520034.2800066	445405588.81424	0.0954636298866468	42520034.2800066	445405588.81424	10.4751935494952	TTPDELVR	ICPL (N-term)
		B7J7R8													TRUE	3226	1041.530683	521.2689795	0.101441	2	314.83378016	34.7	1	76.8	36117257.2201434	3435709.95654819	0.0951265467254812	36117257.2201434	3435709.95654819	10.5123126448165	TTPDELVR	ICPL:13C(6) (N-term)
		B7J7R8													TRUE	21504	1041.530683	521.2689795	0.907641	2	1898.62402082	41.43	1	550.2	445405588.81424	42520034.2800066	0.0954636298866468	445405588.81424	42520034.2800066	10.4751935494952	TTPDELVR	ICPL:13C(6) (N-term)
		B7J7R8													TRUE	6646	1096.484647	548.7459615	0.043877	2	598.00439142	24.99	1	193.6	49260196.5622596	362691810.423119	0.135818331560319	49260196.5622596	362691810.423119	7.36277635361678	WAAPEFDR	ICPL (N-term)
		B7J7R8													TRUE	6643	1102.504789	551.7560325	0.036335	2	597.84029168	35.7	1	1423.1	362691810.423119	49260196.5622596	0.135818331560319	362691810.423119	49260196.5622596	7.36277635361678	WAAPEFDR	ICPL:13C(6) (N-term)
		B7J7R8													TRUE	7721	1102.504789	551.7560325	0.183335	2	688.19505138	26.49	1	67.8	29507444.8231785	4402207.23891623	0.149189713487433	29507444.8231785	4402207.23891623	6.70287499469081	WAAPEFDR	ICPL:13C(6) (N-term)
		B7J7R8													TRUE	4144	1107.588849	554.2980625	0.151275	2	397.04832802	30.97	1	130	23628086.3597476	7854579.24452745	0.332425534803715	23628086.3597476	7854579.24452745	3.00819249817997	VHSLENVAK	ICPL:13C(6) (K)
		B7J7R8													TRUE	5134	1172.582044	586.79466	-0.00492	2	482.64730959	34.84	1	49.2	4029118.73492278	1571546.23253572	0.390047138326848	4029118.73492278	1571546.23253572	2.56379268487808	RIHHEMK	ICPL:13C(6) (K); ICPL:13C(6) (N-term)
		B7J7R8													TRUE	5135	1172.582044	391.532198666667	0.004804	3	482.6857512	27.49	1	48.2	4029118.73492278	1571546.23253572	0.390047138326848	4029118.73492278	1571546.23253572	2.56379268487808	RIHHEMK	ICPL:13C(6) (K); ICPL:13C(6) (N-term)
		B7J7R8													TRUE	4074	1172.582044	586.79466	0.05248	2	392.89051949	39.44	1	90.6	14471586.7596453	1540002.98732533	0.106415627595151	14471586.7596453	1540002.98732533	9.39711603078087	RIHHEMK	ICPL:13C(6) (K); ICPL:13C(6) (N-term)
		B7J7R8													TRUE	4073	1172.582044	391.532198666667	0.052504	3	392.87797816	26.95	1	93.6	14471586.7596453	1540002.98732533	0.106415627595151	14471586.7596453	1540002.98732533	9.39711603078087	RIHHEMK	ICPL:13C(6) (K); ICPL:13C(6) (N-term)
		B7J7R8													TRUE	21215	1188.576963	594.7921195	0.147161	2	1882.80242934	34.31	1	72	4675569.46190645	767169.186289827	0.16408037406785	4675569.46190645	767169.186289827	6.09457411150515	RIHHEMK	ICPL:13C(6) (K); ICPL:13C(6) (N-term); Oxidation (M)
		B7J7R8													TRUE	5084	1188.576963	594.7921195	0.202961	2	479.34820185	40.41	1	77.5	2416310.21053756	364855.500955497	0.150996961964717	2416310.21053756	364855.500955497	6.62264980028979	RIHHEMK	ICPL:13C(6) (K); ICPL:13C(6) (N-term); Oxidation (M)
		B7J7R8													TRUE	4014	1188.576963	594.7921195	0.211761	2	389.48202776	35.1	1	15.1	4420123.07684603	281706.787091412	0.0637327925475829	4420123.07684603	281706.787091412	15.6905097050847	RIHHEMK	ICPL:13C(6) (K); ICPL:13C(6) (N-term); Oxidation (M)
		B7J7R8													TRUE	7590	1206.590177	603.7987265	0.101347	2	681.15832658	44.75	1	47.3	30869359.0224765	346081797.294389	0.0891967137936986	30869359.0224765	346081797.294389	11.2111753613803	VHSLENVAK	ICPL (K); ICPL (N-term)
		B7J7R8													TRUE	9221	1208.584714	604.795995	1.08661	2	825.3069083	56.3	1	56.2	31968446.9125136	309220972.75385	0.103383824932087	31968446.9125136	309220972.75385	9.67269300257467	APTGAVHAFK	ICPL (K); ICPL (N-term)
		B7J7R8													TRUE	7587	1218.630445	406.881665666667	-0.001397	3	680.88286792	33.81	1	62.6	346081797.294389	30869359.0224765	0.0891967137936986	346081797.294389	30869359.0224765	11.2111753613803	VHSLENVAK	ICPL:13C(6) (K); ICPL:13C(6) (N-term)
		B7J7R8													TRUE	7586	1218.630445	609.8188605	0.134079	2	680.81453458	59.32	1	454.6	346081797.294389	30869359.0224765	0.0891967137936986	346081797.294389	30869359.0224765	11.2111753613803	VHSLENVAK	ICPL:13C(6) (K); ICPL:13C(6) (N-term)
		B7J7R8													TRUE	8690	1218.630445	609.8188605	0.206879	2	771.05791022	44.58	1	44.6	23357830.6627382	2350559.05265471	0.100632592409554	23357830.6627382	2350559.05265471	9.93713841664941	VHSLENVAK	ICPL:13C(6) (K); ICPL:13C(6) (N-term)
		B7J7R8													TRUE	9217	1220.624982	407.546511333333	0.104366	3	825.0339083	34.92	1	34.4	309220972.75385	31968446.9125136	0.103383824932087	309220972.75385	31968446.9125136	9.67269300257467	APTGAVHAFK	ICPL:13C(6) (K); ICPL:13C(6) (N-term)
		B7J7R8													TRUE	9213	1220.624982	610.816129	0.112142	2	824.8534587	44.2	1	31.8	309220972.75385	31968446.9125136	0.103383824932087	309220972.75385	31968446.9125136	9.67269300257467	APTGAVHAFK	ICPL:13C(6) (K); ICPL:13C(6) (N-term)
		B7J7R8													TRUE	8703	1220.624982	610.816129	0.160542	2	771.82801848	58.24	1	50.5	33838278.7967905	3274744.50927063	0.0967763321809747	33838278.7967905	3274744.50927063	10.3331049799446	APTGAVHAFK	ICPL:13C(6) (K); ICPL:13C(6) (N-term)
		B7J7R8													TRUE	13889	1280.576856	640.792066	1.162068	2	1215.30149429	48.44	1	32	19141454.5201992	144202412.801377	0.13274018200073	19141454.5201992	144202412.801377	7.5335138533598	VFCFIEAGK	ICPL (K); ICPL (N-term)
		B7J7R8													TRUE	15741	1284.750196	642.878736	0.216928	2	1380.57515761	60.59	1	68.5	10494469.1269143	4451427.52567235	0.424168909531224	10494469.1269143	4451427.52567235	2.35755138467165	IVVTVGLPHK	ICPL:13C(6) (K); ICPL:13C(6) (N-term)
		B7J7R8													TRUE	20423	1412.711149	706.8592125	0.106575	2	1806.73652352	57.38	1	28.3	10741419.4823975	4114141.99219789	0.383016602129721	10741419.4823975	4114141.99219789	2.61085288324217	NAQVLSEEGGAVK	ICPL:13C(6) (K)
		B7J7R8													TRUE	19387	1412.711149	706.8592125	0.139775	2	1716.30922698	87.44	1	201.6	38789271.5897106	6043787.71959924	0.155810807264616	38789271.5897106	6043787.71959924	6.41804004199584	NAQVLSEEGGAVK	ICPL:13C(6) (K)
		B7J7R8													TRUE	7521	1427.702589	714.3549325	0.133335	2	677.36963485	50.59	1	36.7							NGLGENGWIPTNR
		B7J7R8													TRUE	14752	1461.7525	731.379888	1.123624	2	1292.41253944	42.54	1	98.9	25126578.642309	195383938.698184	0.128601044741568	25126578.642309	195383938.698184	7.77598659489556	YDLLVAVPPHK	ICPL (K); ICPL (N-term)
		B7J7R8													TRUE	3304	1473.650587	737.3289315	0.128337	2	318.95668843	70.59	1	40.9	32979002.0154517	3572450.62982333	0.108325007171215	32979002.0154517	3572450.62982333	9.23147873343252	TSLHMEGEYGK	ICPL:13C(6) (K); ICPL:13C(6) (N-term)
		B7J7R8													TRUE	14751	1473.792768	491.935773333333	0.02048	3	1292.33887224	44.08	1	101.3	195383938.698184	25126578.642309	0.128601044741568	195383938.698184	25126578.642309	7.77598659489556	YDLLVAVPPHK	ICPL:13C(6) (K); ICPL:13C(6) (N-term)
		B7J7R8													TRUE	15772	1473.792768	737.400022	0.182356	2	1382.71310747	54.69	1	29.3	4031660.71617733		0.01	4031660.71617733		100	YDLLVAVPPHK	ICPL:13C(6) (K); ICPL:13C(6) (N-term)
		B7J7R8													TRUE	14748	1473.792768	737.400022	0.965556	2	1292.2907725	67.23	1	583	195383938.698184	25126578.642309	0.128601044741568	195383938.698184	25126578.642309	7.77598659489556	YDLLVAVPPHK	ICPL:13C(6) (K); ICPL:13C(6) (N-term)
		B7J7R8													TRUE	14764	1473.792768	491.935773333333	1.04438	3	1293.45320557	39.4	1	25.2	148939405.985563		0.01	148939405.985563		100	YDLLVAVPPHK	ICPL:13C(6) (K); ICPL:13C(6) (N-term)
		B7J7R8													TRUE	14767	1473.792768	737.400022	1.126956	2	1293.55709783	51.68	1	202.1	148939405.985563		0.01	148939405.985563		100	YDLLVAVPPHK	ICPL:13C(6) (K); ICPL:13C(6) (N-term)
		B7J7R8													TRUE	20419	1489.645505	745.3263905	0.077219	2	1806.69200779	24.81	1	37.3	13960308.2412812		0.01	13960308.2412812		100	TSLHMEGEYGK	ICPL:13C(6) (K); ICPL:13C(6) (N-term); Oxidation (M)
		B7J7R8													TRUE	20420	1489.645505	497.220019	0.094743	3	1806.633699	27.09	1	24.3	13960308.2412812		0.01	13960308.2412812		100	TSLHMEGEYGK	ICPL:13C(6) (K); ICPL:13C(6) (N-term); Oxidation (M)
		B7J7R8													TRUE	11480	1514.695035	757.8511555	0.157089	2	1015.71822647	43.92	1	68.9	13758929.17057	117109453.536665	0.117487775367873	13758929.17057	117109453.536665	8.51152383189521	TEFYYTYPIGR	ICPL (N-term)
		B7J7R8													TRUE	11484	1520.715177	507.576576333333	-0.003229	3	1016.29181795	47.34	1	28.3	117109453.536665	13758929.17057	0.117487775367873	117109453.536665	13758929.17057	8.51152383189521	TEFYYTYPIGR	ICPL:13C(6) (N-term)
		B7J7R8													TRUE	10441	1520.715177	760.8612265	0.118547	2	926.44412993	56.56	1	56.7	16249912.1095713	1907905.05267651	0.117410176732755	16249912.1095713	1907905.05267651	8.51714926105735	TEFYYTYPIGR	ICPL:13C(6) (N-term)
		B7J7R8													TRUE	12532	1520.715177	760.8612265	0.118947	2	1105.52260879	65.16	1	79	42941608.7678218	5068866.08753358	0.118040898629115	42941608.7678218	5068866.08753358	8.47164001302635	TEFYYTYPIGR	ICPL:13C(6) (N-term)
		B7J7R8													TRUE	11470	1520.715177	760.8612265	0.122747	2	1015.26786008	80.79	1	63.5	117109453.536665	13758929.17057	0.117487775367873	117109453.536665	13758929.17057	8.51152383189521	TEFYYTYPIGR	ICPL:13C(6) (N-term)
		B7J7R8													TRUE	21867	1523.752744	762.38001	0.08318	2	1924.47376267	24.61	1	11.9	666499.846555161	350728.339054644	0.526224185747981	666499.846555161	350728.339054644	1.90033074701534	NAQVLSEEGGAVK	ICPL:13C(6) (K); ICPL:13C(6) (N-term)
		B7J7R8													TRUE	21841	1523.752744	762.38001	0.10238	2	1922.39345442	23.2	1	18.2	656355.505998796		0.01	656355.505998796		100	NAQVLSEEGGAVK	ICPL:13C(6) (K); ICPL:13C(6) (N-term)
		B7J7R8													TRUE	21931	1523.752744	762.38001	0.10838	2	1929.69618722	33.56	1	19.3	747345.622332972	98671.9823757019	0.132029919527299	747345.622332972	98671.9823757019	7.57404082029477	NAQVLSEEGGAVK	ICPL:13C(6) (K); ICPL:13C(6) (N-term)
		B7J7R8													TRUE	21668	1523.752744	508.589098666667	0.138304	3	1908.59792108	47.43	1	122.6	233391562.001517	17235474.9365915	0.0738478923093181	233391562.001517	17235474.9365915	13.5413478804705	NAQVLSEEGGAVK	ICPL:13C(6) (K); ICPL:13C(6) (N-term)
		B7J7R8													TRUE	21828	1523.752744	762.38001	0.15258	2	1920.92803788	25.62	1	12.8	682958.489133126		0.01	682958.489133126		100	NAQVLSEEGGAVK	ICPL:13C(6) (K); ICPL:13C(6) (N-term)
		B7J7R8													TRUE	21666	1523.752744	762.38001	0.89138	2	1908.57262081	80.73	1	649.3	233391562.001517	17235474.9365915	0.0738478923093181	233391562.001517	17235474.9365915	13.5413478804705	NAQVLSEEGGAVK	ICPL:13C(6) (K); ICPL:13C(6) (N-term)
		B7J7R8													TRUE	9275	1538.744184	769.87573	0.09994	2	828.24983363	61.45	1	73.1	29126846.8312904	3642145.89251137	0.125044290362343	29126846.8312904	3642145.89251137	7.99716642081203	NGLGENGWIPTNR	ICPL:13C(6) (N-term)
		B7J7R8													TRUE	7679	1538.744184	769.87573	1.12734	2	685.79385137	27.94	1	68	146504847.260008	16197277.4446943	0.110557962740634	146504847.260008	16197277.4446943	9.04502918840836	NGLGENGWIPTNR	ICPL:13C(6) (N-term)
		B7J7R8													TRUE	14806	1551.704908	776.356092	0.202816	2	1295.93934745	44.44	1	32.8	2856266.44452532	27803985.0604092	0.102728671387197	2856266.44452532	27803985.0604092	9.73438073807918	VFCFIEAGKDR	ICPL (K); ICPL (N-term)
		B7J7R8													TRUE	13753	1551.704908	776.356092	1.108216	2	1206.3250863	24.81	1	72.4	11815075.2782866	121404636.947856	0.0973198024006385	11815075.2782866	121404636.947856	10.2754010523293	VFCFIEAGKDR	ICPL (K); ICPL (N-term)
		B7J7R8													TRUE	14801	1563.745176	782.376226	0.183748	2	1295.62223118	47.4	1	91.1	27803985.0604092	2856266.44452532	0.102728671387197	27803985.0604092	2856266.44452532	9.73438073807918	VFCFIEAGKDR	ICPL:13C(6) (K); ICPL:13C(6) (N-term)
		B7J7R8													TRUE	15831	1563.745176	782.376226	0.205948	2	1386.53620774	32.57	1	50.2	5889757.97119079	1156706.14467069	0.196392814497406	5889757.97119079	1156706.14467069	5.0918359847285	VFCFIEAGKDR	ICPL:13C(6) (K); ICPL:13C(6) (N-term)
		B7J7R8													TRUE	13747	1563.745176	782.376226	1.001948	2	1206.16894443	50.73	1	400.7	121404636.947856	11815075.2782866	0.0973198024006385	121404636.947856	11815075.2782866	10.2754010523293	VFCFIEAGKDR	ICPL:13C(6) (K); ICPL:13C(6) (N-term)
		B7J7R8													TRUE	13752	1563.745176	521.919909333333	1.038572	3	1206.39021963	53.01	1	41	121404636.947856	11815075.2782866	0.0973198024006385	121404636.947856	11815075.2782866	10.2754010523293	VFCFIEAGKDR	ICPL:13C(6) (K); ICPL:13C(6) (N-term)
		B7J7R8													TRUE	12544	1584.735898	792.871587	0.148626	2	1106.44174212	82.18	1	100.1	25166831.1983179	3611699.6573401	0.143510306437844	25166831.1983179	3611699.6573401	6.96814065011499	MAYNQLYWASAR	ICPL:13C(6) (N-term)
		B7J7R8													TRUE	13607	1584.735898	792.871587	1.171426	2	1196.63245322	47.26	1	34.2	4164529.70705072	2413713.7780631	0.579588560498579	4164529.70705072	2413713.7780631	1.72536186556162	MAYNQLYWASAR	ICPL:13C(6) (N-term)
		B7J7R8													TRUE	12433	1600.730817	800.8690465	0.118307	2	1100.1053592	54.35	1	43.4	17358286.6954853	2662081.40177696	0.153360838455867	17358286.6954853	2662081.40177696	6.52056946263873	MAYNQLYWASAR	ICPL:13C(6) (N-term); Oxidation (M)
		B7J7R8													TRUE	11588	1728.77989	864.893583	0.086234	2	1022.45463448	55.14	1	14.2	1989846.5079247	968374.287419962	0.486657781674789	1989846.5079247	968374.287419962	2.05483203527248	MGIQYETLFNMK	ICPL:13C(6) (K); ICPL:13C(6) (N-term); 2 Oxidation (M)
		B7J7R8													TRUE	14891	1819.999128	910.503202	0.300596	2	1302.19747277	70.27	1	455.6	95972793.9650195		0.01	95972793.9650195		100	NVIILGDTTNLPISK	ICPL:13C(6) (K); ICPL:13C(6) (N-term)
		B7J7R8													TRUE	15908	1819.999128	910.503202	1.072796	2	1392.82789148	64.1	1	47	15752265.2199902		0.01	15752265.2199902		100	NVIILGDTTNLPISK	ICPL:13C(6) (K); ICPL:13C(6) (N-term)
		B7J7R8													TRUE	1512	2010.068525	670.694359	0.458223	3	154.37323135	44.49	1	22.4	4481608.071857	1288965.79149384	0.287612341558404	4481608.071857	1288965.79149384	3.47690225871943	ILVVGGGMGGTIFANHLAR	ICPL:13C(6) (N-term); Oxidation (M)
		B7J7R8													TRUE	11554	2174.954297	725.656283	0.142251	3	1020.22983501	60.75	1	62	8175405.90864674	2462482.12558236	0.301206099501177	8175405.90864674	2462482.12558236	3.3199858889182	ENSINCYTAENAVEFFR	ICPL:13C(6) (N-term)
		B7J7R8													TRUE	2484	2337.154844	779.723132	0.266904	3	247.29342058	23.89	1	40.6	2650636.49075766	455406.835679614	0.171810369798931	2650636.49075766	455406.835679614	5.82037045360124	AGSTTHFEAEVAAENVAAVIK	ICPL:13C(6) (K); ICPL:13C(6) (N-term)
TRUE	Glycine cleavage system H protein 2	B7J7L4	1131.37	51.0345	36	15	0.57	0.02	15	1.8	0.08	120699996	1834		TRUE	4493	980.483579	490.7454275	0.115745	2	416.91294457	50.69	1	80.7	20543035.3112765	32606927.7903099	0.630020572419013	20543035.3112765	32606927.7903099	1.58724975624276	EPGLINK	ICPL (K); ICPL (N-term)
		B7J7L4													TRUE	4490	992.523847	496.7655615	0.099677	2	416.68908642	31.23	1	72.6	32606927.7903099	20543035.3112765	0.630020572419013	32606927.7903099	20543035.3112765	1.58724975624276	EPGLINK	ICPL:13C(6) (K); ICPL:13C(6) (N-term)
		B7J7L4													TRUE	3430	1026.375135	513.6912055	0.100589	2	326.51367189	40.38	1	41.5	9536615.87824854	4516911.48629092	0.473638819467737	9536615.87824854	4516911.48629092	2.1113134289199	MTADGFGGC	ICPL:13C(6) (N-term)
		B7J7L4													TRUE	5580	1269.610975	635.3091255	0.146149	2	507.55965946	78	1	4.9	10973128.6694921	14568565.8015307	0.753205828149481	10973128.6694921	14568565.8015307	1.32765834069136	TGADALAAFEAK	ICPL (K)
		B7J7L4													TRUE	7871	1303.574201	652.2907385	0.141523	2	697.82750951	57.85	1	166.1	38749098.2712491	73838655.5938924	0.52478065803861	38749098.2712491	73838655.5938924	1.90555803588025	DPYGSGWIAK	ICPL (K); ICPL (N-term)
		B7J7L4													TRUE	9461	1303.574201	652.2907385	0.204723	2	841.08122508	38.63	1	10.3	2075053.75562528	5256967.89308028	0.394724449117649	2075053.75562528	5256967.89308028	2.53341287127098	DPYGSGWIAK	ICPL (K); ICPL (N-term)
		B7J7L4													TRUE	7877	1315.614469	658.3108725	0.114855	2	698.05766843	53.77	1	265.9	73838655.5938924	38749098.2712491	0.52478065803861	73838655.5938924	38749098.2712491	1.90555803588025	DPYGSGWIAK	ICPL:13C(6) (K); ICPL:13C(6) (N-term)
		B7J7L4													TRUE	7925	1374.632429	687.8198525	0.158095	2	701.49712657	85.58	1	37.8	16293475.3600571	32440323.5055702	0.502259953026036	16293475.3600571	32440323.5055702	1.99100086314897	TGADALAAFEAK	ICPL (K); ICPL (N-term)
		B7J7L4													TRUE	9516	1374.632429	687.8198525	0.177895	2	844.7334587	83.66	1	44.8	5478243.50129331	10107192.6920492	0.542014352373313	5478243.50129331	10107192.6920492	1.84496959466352	TGADALAAFEAK	ICPL (K); ICPL (N-term)
		B7J7L4													TRUE	10568	1386.672697	693.8399865	0.135227	2	934.79735499	85.2	1	45.9	10111927.6917759	6415618.03365609	0.634460434173593	10111927.6917759	6415618.03365609	1.57614241351793	TGADALAAFEAK	ICPL:13C(6) (K); ICPL:13C(6) (N-term)
		B7J7L4													TRUE	7922	1386.672697	693.8399865	0.142027	2	701.22280124	94.63	1	35.6	32440323.5055702	16293475.3600571	0.502259953026036	32440323.5055702	16293475.3600571	1.99100086314897	TGADALAAFEAK	ICPL:13C(6) (K); ICPL:13C(6) (N-term)
		B7J7L4													TRUE	9511	1386.672697	693.8399865	0.178627	2	844.34638349	83.1	1	40.3	10107192.6920492	5478243.50129331	0.542014352373313	10107192.6920492	5478243.50129331	1.84496959466352	TGADALAAFEAK	ICPL:13C(6) (K); ICPL:13C(6) (N-term)
		B7J7L4													TRUE	11703	1614.743452	807.875364	0.089872	2	1030.94505154	73.25	1	25.4	3567791.49062725	5329371.75870499	0.669458174840144	3567791.49062725	5329371.75870499	1.49374529669278	LTPADFAGDAGELK	ICPL (K); ICPL (N-term)
		B7J7L4													TRUE	10658	1614.743452	807.875364	0.091072	2	941.06078859	70.05	1	25	1939714.86936206	4054141.97827093	0.478452624441471	1939714.86936206	4054141.97827093	2.09007109359545	LTPADFAGDAGELK	ICPL (K); ICPL (N-term)
		B7J7L4													TRUE	12778	1614.743452	807.875364	0.111872	2	1120.72743386	64.76	1	63.5	9312741.26268435	16062834.6892095	0.579769476737523	9312741.26268435	16062834.6892095	1.72482346885041	LTPADFAGDAGELK	ICPL (K); ICPL (N-term)
		B7J7L4													TRUE	8005	1614.743452	807.875364	0.145472	2	707.09429298	91.42	1	71.7	43249152.5943443	73154708.9813182	0.591201211741394	43249152.5943443	73154708.9813182	1.69147149927938	LTPADFAGDAGELK	ICPL (K); ICPL (N-term)
		B7J7L4													TRUE	14866	1614.743452	807.875364	0.153272	2	1299.91629784	53.7	1	32.5	6090520.76064169	9808049.99120505	0.620971626990391	6090520.76064169	9808049.99120505	1.61037953512725	LTPADFAGDAGELK	ICPL (K); ICPL (N-term)
		B7J7L4													TRUE	8009	1614.743452	538.919334666667	0.157396	3	707.43116765	20.17	1	4.6	43249152.5943443	73154708.9813182	0.591201211741394	43249152.5943443	73154708.9813182	1.69147149927938	LTPADFAGDAGELK	ICPL (K); ICPL (N-term)
		B7J7L4													TRUE	13818	1614.743452	807.875364	1.123272	2	1211.1410943	61.98	1	37.9	8143246.48094045	12503447.1285487	0.651280114773088	8143246.48094045	12503447.1285487	1.53543763630555	LTPADFAGDAGELK	ICPL (K); ICPL (N-term)
		B7J7L4													TRUE	11696	1626.783719	813.8954975	0.065005	2	1030.34178434	72.09	1	38.5	5329371.75870499	3567791.49062725	0.669458174840144	5329371.75870499	3567791.49062725	1.49374529669278	LTPADFAGDAGELK	ICPL:13C(6) (K); ICPL:13C(6) (N-term)
		B7J7L4													TRUE	10654	1626.783719	813.8954975	0.081805	2	940.81933793	77.39	1	48	4054141.97827093	1939714.86936206	0.478452624441471	4054141.97827093	1939714.86936206	2.09007109359545	LTPADFAGDAGELK	ICPL:13C(6) (K); ICPL:13C(6) (N-term)
		B7J7L4													TRUE	12776	1626.783719	813.8954975	0.129605	2	1120.425692	72.49	1	44.7	16062834.6892095	9312741.26268435	0.579769476737523	16062834.6892095	9312741.26268435	1.72482346885041	LTPADFAGDAGELK	ICPL:13C(6) (K); ICPL:13C(6) (N-term)
		B7J7L4													TRUE	8001	1626.783719	813.8954975	0.135605	2	706.80650952	74.98	1	44.4	73154708.9813182	43249152.5943443	0.591201211741394	73154708.9813182	43249152.5943443	1.69147149927938	LTPADFAGDAGELK	ICPL:13C(6) (K); ICPL:13C(6) (N-term)
		B7J7L4													TRUE	8007	1626.783719	542.932757	0.139929	3	707.62681778	35.54	1	53.9	73154708.9813182		0.01	73154708.9813182		100	LTPADFAGDAGELK	ICPL:13C(6) (K); ICPL:13C(6) (N-term)
		B7J7L4													TRUE	8018	1626.783719	813.8954975	0.141605	2	708.06404337	84.32	1	86.8	73154708.9813182		0.01	73154708.9813182		100	LTPADFAGDAGELK	ICPL:13C(6) (K); ICPL:13C(6) (N-term)
		B7J7L4													TRUE	8022	1626.783719	542.932757	0.408729	3	708.3048679	40.04	1	13.3	73154708.9813182		0.01	73154708.9813182		100	LTPADFAGDAGELK	ICPL:13C(6) (K); ICPL:13C(6) (N-term)
		B7J7L4													TRUE	14864	1626.783719	813.8954975	1.094605	2	1299.78245625	69	1	26.2	9808049.99120505	6090520.76064169	0.620971626990391	9808049.99120505	6090520.76064169	1.61037953512725	LTPADFAGDAGELK	ICPL:13C(6) (K); ICPL:13C(6) (N-term)
		B7J7L4													TRUE	21642	1783.85362	892.430448	1.032904	2	1906.66121282	98.39	1	47.5	16823048.8276872	8403631.01572873	0.49953079859687	16823048.8276872	8403631.01572873	2.00187856846644	SPVSGTVVSSNDDVAK	ICPL:13C(6) (K); ICPL:13C(6) (N-term)
TRUE	Lipoprotein, putative	B7J904	1048.27	55.4455	23	13	0.35	0.04	13	3.32	0.38	185008295	1734.8		TRUE	18244	970.430341	485.7188085	0.091383	2	1615.92021682	32.85	1	98.2	4382027.48098269	1595437.53384321	0.364086610767996	4382027.48098269	1595437.53384321	2.74659921684739	ADEANTK	ICPL:13C(6) (K); ICPL:13C(6) (N-term)
		B7J904													TRUE	4414	1558.713193	779.8602345	0.145531	2	412.31588642	120.73	1	111.1	95815726.1876978	328847766.465094	0.291368030920983	95815726.1876978	328847766.465094	3.43208552029235	ANAAQSTATDALSK	ICPL (K); ICPL (N-term)
		B7J904													TRUE	5492	1558.713193	779.8602345	0.146131	2	502.15306799	32.37	1	68.4	16044677.5044021	83988350.1807615	0.191034559791571	16044677.5044021	83988350.1807615	5.2346549288833	ANAAQSTATDALSK	ICPL (K); ICPL (N-term)
		B7J904													TRUE	8731	1570.713178	785.860227	0.114946	2	773.30222701	54.38	1	29.3	14868185.8858128	30345587.2817303	0.48996204119484	14868185.8858128	30345587.2817303	2.04097443459367	ADAAQSTANEALAK	ICPL (K); ICPL (N-term)
		B7J904													TRUE	5506	1570.713178	785.860227	0.143946	2	503.02359332	80.02	1	58.8	84369109.6045016	263579869.440854	0.32008935198078	84369109.6045016	263579869.440854	3.1241276656402	ADAAQSTANEALAK	ICPL (K); ICPL (N-term)
		B7J904													TRUE	4412	1570.753461	785.8803685	0.111863	2	412.24703577	103.38	1	298.7	328847766.465094	95815726.1876978	0.291368030920983	328847766.465094	95815726.1876978	3.43208552029235	ANAAQSTATDALSK	ICPL:13C(6) (K); ICPL:13C(6) (N-term)
		B7J904													TRUE	5487	1570.753461	785.8803685	0.112863	2	502.11277627	112.54	1	187.3	83988350.1807615	16044677.5044021	0.191034559791571	83988350.1807615	16044677.5044021	5.2346549288833	ANAAQSTATDALSK	ICPL:13C(6) (K); ICPL:13C(6) (N-term)
		B7J904													TRUE	4413	1570.753461	524.256004333333	0.981287	3	412.32673603	64.05	1	86.8	328847766.465094	95815726.1876978	0.291368030920983	328847766.465094	95815726.1876978	3.43208552029235	ANAAQSTATDALSK	ICPL:13C(6) (K); ICPL:13C(6) (N-term)
		B7J904													TRUE	10293	1582.753446	791.880361	-0.983522	2	917.13955499	66.04	1	22.3	8139130.97345673	2696100.23716259	0.33125160977936	8139130.97345673	2696100.23716259	3.0188532537731	ADAAQSTANEALAK	ICPL:13C(6) (K); ICPL:13C(6) (N-term)
		B7J904													TRUE	21579	1582.753446	791.880361	0.061678	2	1902.88807095	72	1	36	9808693.48671611	1605988.25540301	0.163731108284503	9808693.48671611	1605988.25540301	6.10757485536822	ADAAQSTANEALAK	ICPL:13C(6) (K); ICPL:13C(6) (N-term)
		B7J904													TRUE	9240	1582.753446	791.880361	0.072678	2	826.2517083	83.2	1	41.9	17204517.6343334	5247422.47296097	0.305002592022063	17204517.6343334	5247422.47296097	3.27866066111222	ADAAQSTANEALAK	ICPL:13C(6) (K); ICPL:13C(6) (N-term)
		B7J904													TRUE	8726	1582.753446	791.880361	0.118878	2	773.08202701	113.6	1	55.1	30345587.2817303	14868185.8858128	0.48996204119484	30345587.2817303	14868185.8858128	2.04097443459367	ADAAQSTANEALAK	ICPL:13C(6) (K); ICPL:13C(6) (N-term)
		B7J904													TRUE	6562	1582.753446	791.880361	0.121478	2	592.5535333	91.48	1	54.9	20387675.6330895	6891944.68709363	0.338044650656885	20387675.6330895	6891944.68709363	2.95818909737755	ADAAQSTANEALAK	ICPL:13C(6) (K); ICPL:13C(6) (N-term)
		B7J904													TRUE	5493	1582.753446	791.880361	0.128078	2	502.55404346	100.95	1	306.3	263579869.440854	84369109.6045016	0.32008935198078	263579869.440854	84369109.6045016	3.1241276656402	ADAAQSTANEALAK	ICPL:13C(6) (K); ICPL:13C(6) (N-term)
		B7J904													TRUE	7626	1582.753446	791.880361	0.161478	2	683.13583485	72.89	1	38.1	17286346.7154597	13976629.731244	0.808535774580079	17286346.7154597	13976629.731244	1.2368036535172	ADAAQSTANEALAK	ICPL:13C(6) (K); ICPL:13C(6) (N-term)
		B7J904													TRUE	8729	2286.024213	762.679588333333	-0.764065	3	773.20348568	42.47	1	46.5	23321286.0832989	8807442.35542408	0.377656803486981	23321286.0832989	8807442.35542408	2.6479067522862	ANAAQSTADQAMSTANAANQK	ICPL:13C(6) (K); ICPL:13C(6) (N-term)
		B7J904													TRUE	12366	2286.024213	762.679588333333	0.213935	3	1096.30640879	45.05	1	6.7	5661284.49089056		0.01	5661284.49089056		100	ANAAQSTADQAMSTANAANQK	ICPL:13C(6) (K); ICPL:13C(6) (N-term)
		B7J904													TRUE	4302	2302.019132	768.011228	0.053016	3	405.60255308	61.36	1	11.6	13973818.1254395	2970817.84539765	0.21259886301148	13973818.1254395	2970817.84539765	4.70369401715004	ANAAQSTADQAMSTANAANQK	ICPL:13C(6) (K); ICPL:13C(6) (N-term); Oxidation (M)
		B7J904													TRUE	8596	2302.019132	768.011228	0.162516	3	765.93731021	53.27	1	33.7	13680351.0915616	5394784.80649213	0.394345493795095	13680351.0915616	5394784.80649213	2.53584741231913	ANAAQSTADQAMSTANAANQK	ICPL:13C(6) (K); ICPL:13C(6) (N-term); Oxidation (M)
TRUE	Carboxysome shell peptide	B7JB23	1017.24	81	34	12	0.86	0.04	12	1.2	0.06	166323054	1413.5		TRUE	20321	1149.564695	575.2859855	0.179029	2	1801.11583233	83.67	1	210.1	97688025.5121344	139662650.171577	0.699457051632083	97688025.5121344	139662650.171577	1.42968034658689	GETGAVNAAVR	ICPL (N-term)
		B7JB23													TRUE	20319	1155.584836	578.296056	-0.845912	2	1801.00636567	69.13	1	9.5	139662650.171577	97688025.5121344	0.699457051632083	139662650.171577	97688025.5121344	1.42968034658689	GETGAVNAAVR	ICPL:13C(6) (N-term)
		B7JB23													TRUE	13294	1291.74809	646.377683	0.134634	2	1178.08050282	50.87	1	53.2							VGDGLVAAHIIAR
		B7JB23													TRUE	13297	1291.74809	431.254214	0.142758	3	1178.2766863	70	1	19.6							VGDGLVAAHIIAR
		B7JB23													TRUE	484	1396.769544	698.88841	0.18238	2	56.87977439	77.97	1	35.1	1323894.67396915	1548734.70081116	0.854823407311625	1323894.67396915	1548734.70081116	1.16983226178252	VGDGLVAAHIIAR	ICPL (N-term)
		B7JB23													TRUE	485	1396.769544	698.88841	0.21018	2	56.97049119	73.28	1	6	1323894.67396915	1548734.70081116	0.854823407311625	1323894.67396915	1548734.70081116	1.16983226178252	VGDGLVAAHIIAR	ICPL (N-term)
		B7JB23													TRUE	1411	1396.769544	698.88841	0.23638	2	147.33666442	33.68	1	11.5	2849157.24649172	3089170.04490676	0.9223050868272	2849157.24649172	3089170.04490676	1.08423992698563	VGDGLVAAHIIAR	ICPL (N-term)
		B7JB23													TRUE	14539	1396.769544	698.88841	0.24038	2	1280.59357252	86.49	1	145.4	84036623.2129539	106329708.69038	0.7903400117239	84036623.2129539	106329708.69038	1.26527821591468	VGDGLVAAHIIAR	ICPL (N-term)
		B7JB23													TRUE	1408	1396.769544	698.88841	0.24498	2	146.88689802	43.53	1	29.9	2849157.24649172	3089170.04490676	0.9223050868272	2849157.24649172	3089170.04490676	1.08423992698563	VGDGLVAAHIIAR	ICPL (N-term)
		B7JB23													TRUE	1407	1396.769544	698.88841	0.24498	2	146.86993108	70.1	1	52.6	2849157.24649172	3089170.04490676	0.9223050868272	2849157.24649172	3089170.04490676	1.08423992698563	VGDGLVAAHIIAR	ICPL (N-term)
		B7JB23													TRUE	15567	1396.769544	698.88841	0.25618	2	1370.56903282	89.5	1	42.6	6235625.81124017	7496500.75239668	0.831804866990322	6235625.81124017	7496500.75239668	1.20220503592177	VGDGLVAAHIIAR	ICPL (N-term)
		B7JB23													TRUE	2343	1396.769544	698.88841	0.31618	2	236.82832885	109.33	1	52.1	2879895.4934972	2675044.71456452	1.0765784503778	2879895.4934972	2675044.71456452	0.928868676174108	VGDGLVAAHIIAR	ICPL (N-term)
		B7JB23													TRUE	2342	1396.769544	698.88841	0.31618	2	236.81164565	73.16	1	67	2879895.4934972	2675044.71456452	1.0765784503778	2879895.4934972	2675044.71456452	0.928868676174108	VGDGLVAAHIIAR	ICPL (N-term)
		B7JB23													TRUE	14542	1402.789686	468.268079333333	-1.037638	3	1280.82108931	60.3	1	2.1	106329708.69038	84036623.2129539	0.7903400117239	106329708.69038	84036623.2129539	1.26527821591468	VGDGLVAAHIIAR	ICPL:13C(6) (N-term)
		B7JB23													TRUE	14538	1402.789686	701.898481	-0.714162	2	1280.58268078	70.23	1	10.4	106329708.69038	84036623.2129539	0.7903400117239	106329708.69038	84036623.2129539	1.26527821591468	VGDGLVAAHIIAR	ICPL:13C(6) (N-term)
		B7JB23													TRUE	15566	1402.789686	701.898481	0.237838	2	1370.55593255	62.47	1	64.5	7496500.75239668	6235625.81124017	0.831804866990322	7496500.75239668	6235625.81124017	1.20220503592177	VGDGLVAAHIIAR	ICPL:13C(6) (N-term)
		B7JB23													TRUE	2478	1499.80055	750.403913	0.214974	2	247.10354538	98.35	1	26.5	1164322.89282664	1345142.30684424	0.865575996608258	1164322.89282664	1345142.30684424	1.15530005905718	QFVGGGYVTVLVR	ICPL (N-term)
		B7JB23													TRUE	2481	1499.80055	750.403913	0.231774	2	247.02225365	54.59	1	29.9	1164322.89282664	1345142.30684424	0.865575996608258	1164322.89282664	1345142.30684424	1.15530005905718	QFVGGGYVTVLVR	ICPL (N-term)
		B7JB23													TRUE	1295	1580.777082	527.597211333333	-0.828934	3	138.80757322	21.33	1	3.1							MANVSGVALGMIETR	2 Oxidation (M)
		B7JB23													TRUE	1293	1580.777082	790.892179	-0.821158	2	138.66230602	20.99	1	90.8							MANVSGVALGMIETR	2 Oxidation (M)
		B7JB23													TRUE	366	1580.777082	790.892179	-0.792558	2	48.490008	22.08	1	57.4							MANVSGVALGMIETR	2 Oxidation (M)
		B7JB23													TRUE	10697	1596.772626	798.889951	0.121098	2	944.32938806	77.04	1	44.8	15846531.7447979	21757004.9920748	0.728341596215573	15846531.7447979	21757004.9920748	1.37298213530018	GLVPAIEAADAMTK	ICPL (K); ICPL (N-term)
		B7JB23													TRUE	10696	1608.812894	804.910085	0.11403	2	944.32045473	74.24	1	15	21757004.9920748	15846531.7447979	0.728341596215573	21757004.9920748	15846531.7447979	1.37298213530018	GLVPAIEAADAMTK	ICPL:13C(6) (K); ICPL:13C(6) (N-term)
		B7JB23													TRUE	10567	1612.767545	806.8874105	0.103179	2	934.82696352	66.25	1	31.1	8071188.40457845	7149101.29607341	1.12897944375351	8071188.40457845	7149101.29607341	0.885755719940576	GLVPAIEAADAMTK	ICPL (K); ICPL (N-term); Oxidation (M)
		B7JB23													TRUE	10563	1624.807813	812.9075445	0.124511	2	934.51620512	67.88	1	26.5	7149101.29607341	8071188.40457845	1.12897944375351	7149101.29607341	8071188.40457845	0.885755719940576	GLVPAIEAADAMTK	ICPL:13C(6) (K); ICPL:13C(6) (N-term); Oxidation (M)
		B7JB23													TRUE	7589	1635.822431	818.4148535	0.081493	2	680.81559272	31.8	1	20.5							VHSEVENILPSSPVE
		B7JB23													TRUE	5463	1635.822431	818.4148535	0.082093	2	500.51605147	27.07	1	19.9							VHSEVENILPSSPVE
		B7JB23													TRUE	6518	1635.822431	818.4148535	0.098493	2	590.3151333	37.02	1	39.6							VHSEVENILPSSPVE
		B7JB23													TRUE	7754	1740.843885	870.9255805	0.137439	2	690.52551805	58.66	1	52	43826236.1336085	67058428.4827835	0.653552985436579	43826236.1336085	67058428.4827835	1.53009782264554	VHSEVENILPSSPVE	ICPL (N-term)
		B7JB23													TRUE	7755	1740.843885	870.9255805	0.218039	2	690.27314312	61.11	1	98.1	43826236.1336085	67058428.4827835	0.653552985436579	43826236.1336085	67058428.4827835	1.53009782264554	VHSEVENILPSSPVE	ICPL (N-term)
		B7JB23													TRUE	9363	1746.864026	873.935651	-0.942702	2	833.6769755	26.1	1	11.5	2891735.15662576	2109711.53221518	0.729565958826226	2891735.15662576	2109711.53221518	1.37067798723623	VHSEVENILPSSPVE	ICPL:13C(6) (N-term)
		B7JB23													TRUE	11444	1746.864026	873.935651	-0.008102	2	1013.44408462	29.71	1	16.2	3384032.19397184	3441327.78348496	1.01693115970208	3384032.19397184	3441327.78348496	0.983350731718121	VHSEVENILPSSPVE	ICPL:13C(6) (N-term)
TRUE	Carboxysome shell peptide	B7JB24	1000.96	68.3673	36	14	0.91	0.05	14	1.13	0.06	187797895	1516.1		TRUE	20321	1149.564695	575.2859855	0.179029	2	1801.11583233	83.67	1	210.1	97688025.5121344	139662650.171577	0.699457051632083	97688025.5121344	139662650.171577	1.42968034658689	GETGAVNAAVR	ICPL (N-term)
		B7JB24													TRUE	20319	1155.584836	578.296056	-0.845912	2	1801.00636567	69.13	1	9.5	139662650.171577	97688025.5121344	0.699457051632083	139662650.171577	97688025.5121344	1.42968034658689	GETGAVNAAVR	ICPL:13C(6) (N-term)
		B7JB24													TRUE	13294	1291.74809	646.377683	0.134634	2	1178.08050282	50.87	1	53.2							VGDGLVAAHIIAR
		B7JB24													TRUE	13297	1291.74809	431.254214	0.142758	3	1178.2766863	70	1	19.6							VGDGLVAAHIIAR
		B7JB24													TRUE	484	1396.769544	698.88841	0.18238	2	56.87977439	77.97	1	35.1	1323894.67396915	1548734.70081116	0.854823407311625	1323894.67396915	1548734.70081116	1.16983226178252	VGDGLVAAHIIAR	ICPL (N-term)
		B7JB24													TRUE	485	1396.769544	698.88841	0.21018	2	56.97049119	73.28	1	6	1323894.67396915	1548734.70081116	0.854823407311625	1323894.67396915	1548734.70081116	1.16983226178252	VGDGLVAAHIIAR	ICPL (N-term)
		B7JB24													TRUE	1411	1396.769544	698.88841	0.23638	2	147.33666442	33.68	1	11.5	2849157.24649172	3089170.04490676	0.9223050868272	2849157.24649172	3089170.04490676	1.08423992698563	VGDGLVAAHIIAR	ICPL (N-term)
		B7JB24													TRUE	14539	1396.769544	698.88841	0.24038	2	1280.59357252	86.49	1	145.4	84036623.2129539	106329708.69038	0.7903400117239	84036623.2129539	106329708.69038	1.26527821591468	VGDGLVAAHIIAR	ICPL (N-term)
		B7JB24													TRUE	1408	1396.769544	698.88841	0.24498	2	146.88689802	43.53	1	29.9	2849157.24649172	3089170.04490676	0.9223050868272	2849157.24649172	3089170.04490676	1.08423992698563	VGDGLVAAHIIAR	ICPL (N-term)
		B7JB24													TRUE	1407	1396.769544	698.88841	0.24498	2	146.86993108	70.1	1	52.6	2849157.24649172	3089170.04490676	0.9223050868272	2849157.24649172	3089170.04490676	1.08423992698563	VGDGLVAAHIIAR	ICPL (N-term)
		B7JB24													TRUE	15567	1396.769544	698.88841	0.25618	2	1370.56903282	89.5	1	42.6	6235625.81124017	7496500.75239668	0.831804866990322	6235625.81124017	7496500.75239668	1.20220503592177	VGDGLVAAHIIAR	ICPL (N-term)
		B7JB24													TRUE	2343	1396.769544	698.88841	0.31618	2	236.82832885	109.33	1	52.1	2879895.4934972	2675044.71456452	1.0765784503778	2879895.4934972	2675044.71456452	0.928868676174108	VGDGLVAAHIIAR	ICPL (N-term)
		B7JB24													TRUE	2342	1396.769544	698.88841	0.31618	2	236.81164565	73.16	1	67	2879895.4934972	2675044.71456452	1.0765784503778	2879895.4934972	2675044.71456452	0.928868676174108	VGDGLVAAHIIAR	ICPL (N-term)
		B7JB24													TRUE	14542	1402.789686	468.268079333333	-1.037638	3	1280.82108931	60.3	1	2.1	106329708.69038	84036623.2129539	0.7903400117239	106329708.69038	84036623.2129539	1.26527821591468	VGDGLVAAHIIAR	ICPL:13C(6) (N-term)
		B7JB24													TRUE	14538	1402.789686	701.898481	-0.714162	2	1280.58268078	70.23	1	10.4	106329708.69038	84036623.2129539	0.7903400117239	106329708.69038	84036623.2129539	1.26527821591468	VGDGLVAAHIIAR	ICPL:13C(6) (N-term)
		B7JB24													TRUE	15566	1402.789686	701.898481	0.237838	2	1370.55593255	62.47	1	64.5	7496500.75239668	6235625.81124017	0.831804866990322	7496500.75239668	6235625.81124017	1.20220503592177	VGDGLVAAHIIAR	ICPL:13C(6) (N-term)
		B7JB24													TRUE	2478	1499.80055	750.403913	0.214974	2	247.10354538	98.35	1	26.5	1164322.89282664	1345142.30684424	0.865575996608258	1164322.89282664	1345142.30684424	1.15530005905718	QFVGGGYVTVLVR	ICPL (N-term)
		B7JB24													TRUE	2481	1499.80055	750.403913	0.231774	2	247.02225365	54.59	1	29.9	1164322.89282664	1345142.30684424	0.865575996608258	1164322.89282664	1345142.30684424	1.15530005905718	QFVGGGYVTVLVR	ICPL (N-term)
		B7JB24													TRUE	2446	1522.768217	761.8877465	0.140507	2	244.55783711	46.39	1	15.8	1404057.03084361	1096974.02742729	1.27993643945838	1404057.03084361	1096974.02742729	0.78128879620238	ANVSGVALGMIETR	ICPL (N-term)
		B7JB24													TRUE	14685	1522.768217	761.8877465	0.171107	2	1288.3168557	40.68	1	20.7	5930200.78501033	5616149.03108705	1.05591941242743	5930200.78501033	5616149.03108705	0.947041969520307	ANVSGVALGMIETR	ICPL (N-term)
		B7JB24													TRUE	13632	1522.768217	761.8877465	1.173107	2	1198.20297803	96.43	1	80.8	16413853.386757	17826642.4342247	0.920748449817149	16413853.386757	17826642.4342247	1.08607296618158	ANVSGVALGMIETR	ICPL (N-term)
		B7JB24													TRUE	14682	1528.788358	764.897817	0.114966	2	1288.10635598	39.35	1	37	5616149.03108705	5930200.78501033	1.05591941242743	5616149.03108705	5930200.78501033	0.947041969520307	ANVSGVALGMIETR	ICPL:13C(6) (N-term)
		B7JB24													TRUE	13629	1528.788358	764.897817	1.147766	2	1198.07852789	51.23	1	61.9	17826642.4342247	16413853.386757	0.920748449817149	17826642.4342247	16413853.386757	1.08607296618158	ANVSGVALGMIETR	ICPL:13C(6) (N-term)
		B7JB24													TRUE	13474	1544.783277	772.8952765	-0.863153	2	1189.32702817	57.93	1	3.8	5032904.90975646	5456184.35550475	1.08410241268969	5032904.90975646	5456184.35550475	0.922422077743534	ANVSGVALGMIETR	ICPL:13C(6) (N-term); Oxidation (M)
		B7JB24													TRUE	1295	1580.777082	527.597211333333	-0.828934	3	138.80757322	21.33	1	3.1							MANVSGVALGMIETR	2 Oxidation (M)
		B7JB24													TRUE	1293	1580.777082	790.892179	-0.821158	2	138.66230602	20.99	1	90.8							MANVSGVALGMIETR	2 Oxidation (M)
		B7JB24													TRUE	366	1580.777082	790.892179	-0.792558	2	48.490008	22.08	1	57.4							MANVSGVALGMIETR	2 Oxidation (M)
		B7JB24													TRUE	7589	1635.822431	818.4148535	0.081493	2	680.81559272	31.8	1	20.5							VHSEVENILPSSPVE
		B7JB24													TRUE	5463	1635.822431	818.4148535	0.082093	2	500.51605147	27.07	1	19.9							VHSEVENILPSSPVE
		B7JB24													TRUE	6518	1635.822431	818.4148535	0.098493	2	590.3151333	37.02	1	39.6							VHSEVENILPSSPVE
		B7JB24													TRUE	7754	1740.843885	870.9255805	0.137439	2	690.52551805	58.66	1	52	43826236.1336085	67058428.4827835	0.653552985436579	43826236.1336085	67058428.4827835	1.53009782264554	VHSEVENILPSSPVE	ICPL (N-term)
		B7JB24													TRUE	7755	1740.843885	870.9255805	0.218039	2	690.27314312	61.11	1	98.1	43826236.1336085	67058428.4827835	0.653552985436579	43826236.1336085	67058428.4827835	1.53009782264554	VHSEVENILPSSPVE	ICPL (N-term)
		B7JB24													TRUE	9363	1746.864026	873.935651	-0.942702	2	833.6769755	26.1	1	11.5	2891735.15662576	2109711.53221518	0.729565958826226	2891735.15662576	2109711.53221518	1.37067798723623	VHSEVENILPSSPVE	ICPL:13C(6) (N-term)
		B7JB24													TRUE	11444	1746.864026	873.935651	-0.008102	2	1013.44408462	29.71	1	16.2	3384032.19397184	3441327.78348496	1.01693115970208	3384032.19397184	3441327.78348496	0.983350731718121	VHSEVENILPSSPVE	ICPL:13C(6) (N-term)
TRUE	Putative uncharacterized protein	B7J909	882.726	54.7945	40	12	0.44	0.05	12	2.58	0.28	232345845	2040		TRUE	3267	851.379499	851.379499	0.120801	1	316.9872383	24.14	1	27	8607488.22354765	3019310.04269602	0.350777133152043	8607488.22354765	3019310.04269602	2.85081296780698	SYMTK	ICPL:13C(6) (K); ICPL:13C(6) (N-term)
		B7J909													TRUE	7915	983.483259	983.483259	0.143441	1	700.72119324	39.71	1	1.3	33483793.6422673	85121355.8803299	0.393365369900139	33483793.6422673	85121355.8803299	2.5421658247493	VDDILAK	ICPL (K); ICPL (N-term)
		B7J909													TRUE	7913	983.483259	492.2452675	0.143465	2	700.69091805	43.36	1	40.9	33483793.6422673	85121355.8803299	0.393365369900139	33483793.6422673	85121355.8803299	2.5421658247493	VDDILAK	ICPL (K); ICPL (N-term)
		B7J909													TRUE	7923	995.523527	498.2654015	0.077797	2	701.47714258	42.05	1	139.5	85121355.8803299		0.01	85121355.8803299		100	VDDILAK	ICPL:13C(6) (K); ICPL:13C(6) (N-term)
		B7J909													TRUE	7924	995.523527	995.523527	0.077873	1	701.48940924	43.52	1	73.3	85121355.8803299		0.01	85121355.8803299		100	VDDILAK	ICPL:13C(6) (K); ICPL:13C(6) (N-term)
		B7J909													TRUE	7910	995.523527	995.523527	0.132373	1	700.42524284	47.45	1	37.2	85121355.8803299	33483793.6422673	0.393365369900139	85121355.8803299	33483793.6422673	2.5421658247493	VDDILAK	ICPL:13C(6) (K); ICPL:13C(6) (N-term)
		B7J909													TRUE	7909	995.523527	498.2654015	0.132397	2	700.41235964	43.01	1	60.4	85121355.8803299	33483793.6422673	0.393365369900139	85121355.8803299	33483793.6422673	2.5421658247493	VDDILAK	ICPL:13C(6) (K); ICPL:13C(6) (N-term)
		B7J909													TRUE	4188	1084.553403	542.7803395	0.107721	2	399.3302779	61.15	1	104.8	33628910.5123081	92842619.3676847	0.362214150584523	33628910.5123081	92842619.3676847	2.76079771700319	KGITATQR	ICPL (K); ICPL (N-term)
		B7J909													TRUE	4186	1096.593671	548.8004735	0.081853	2	399.3757195	52.15	1	67.5	92842619.3676847	33628910.5123081	0.362214150584523	92842619.3676847	33628910.5123081	2.76079771700319	KGITATQR	ICPL:13C(6) (K); ICPL:13C(6) (N-term)
		B7J909													TRUE	19455	1346.564771	673.7860235	1.101553	2	1720.02096031	62.66	1	72	34070666.4653081	91003820.9677671	0.374387208174212	34070666.4653081	91003820.9677671	2.67103142993784	QTQSDPDFAK	ICPL (K); ICPL (N-term)
		B7J909													TRUE	20497	1358.605039	679.8061575	0.094685	2	1810.52524886	56.07	1	57.1	14477297.6584694		0.01	14477297.6584694		100	QTQSDPDFAK	ICPL:13C(6) (K); ICPL:13C(6) (N-term)
		B7J909													TRUE	19451	1358.605039	679.8061575	0.120285	2	1719.79428565	58.67	1	151.9	91003820.9677671	34070666.4653081	0.374387208174212	91003820.9677671	34070666.4653081	2.67103142993784	QTQSDPDFAK	ICPL:13C(6) (K); ICPL:13C(6) (N-term)
		B7J909													TRUE	21595	1509.733213	755.3702445	-0.847689	2	1903.9102208	60.71	1	17.8	27986732.3114324	35986987.5461311	0.777690332528019	27986732.3114324	35986987.5461311	1.28585885431972	TAVAGGAAASPAEVK	ICPL (K); ICPL (N-term)
		B7J909													TRUE	21598	1521.773481	761.3903785	0.150043	2	1903.91514562	45.1	1	121.8	35986987.5461311	27986732.3114324	0.777690332528019	35986987.5461311	27986732.3114324	1.28585885431972	TAVAGGAAASPAEVK	ICPL:13C(6) (K); ICPL:13C(6) (N-term)
		B7J909													TRUE	10146	1531.786298	766.396787	0.007426	2	908.77812138	74.49	1	139.4							NHLTAEQYSSLLR
		B7J909													TRUE	12210	1531.786298	766.396787	0.059626	2	1087.8727336	65.67	1	21.4							NHLTAEQYSSLLR
		B7J909													TRUE	11175	1531.786298	766.396787	0.096626	2	997.77527607	66.16	1	29.7							NHLTAEQYSSLLR
		B7J909													TRUE	8582	1531.786298	511.26695	0.09735	3	765.06431022	38.5	1	15							NHLTAEQYSSLLR
		B7J909													TRUE	8580	1531.786298	766.396787	0.100626	2	764.97936035	63.51	1	42.7							NHLTAEQYSSLLR
		B7J909													TRUE	13292	1531.786298	766.396787	0.106026	2	1177.8895199	59.45	1	24							NHLTAEQYSSLLR
		B7J909													TRUE	1239	1531.786298	766.396787	0.111026	2	134.26668948	36.8	1	15							NHLTAEQYSSLLR
		B7J909													TRUE	2177	1531.786298	766.396787	0.126826	2	224.12853738	21.95	2	13.5							NHLTAEQYSSLLR
		B7J909													TRUE	9091	1531.786298	766.396787	0.127426	2	818.3165915	58.52	1	56.6							NHLTAEQYSSLLR
		B7J909													TRUE	14329	1531.786298	766.396787	0.133626	2	1268.02248931	50.57	1	45.9							NHLTAEQYSSLLR
		B7J909													TRUE	15377	1531.786298	766.396787	0.169626	2	1358.23562428	63.08	1	36.8							NHLTAEQYSSLLR
		B7J909													TRUE	11298	1636.807752	818.907514	0.120172	2	1004.95721794	65.87	1	36.2	7917190.7001784	32835017.3100526	0.241120344948151	7917190.7001784	32835017.3100526	4.14730660830397	NHLTAEQYSSLLR	ICPL (N-term)
		B7J909													TRUE	10269	1636.807752	818.907514	0.126372	2	915.73832993	58.68	1	45.9	12194849.6129583	53181234.3137122	0.229307382017909	12194849.6129583	53181234.3137122	4.36095860150678	NHLTAEQYSSLLR	ICPL (N-term)
		B7J909													TRUE	10266	1642.827894	548.280815333333	0.119354	3	915.47600459	48.67	1	38.4	53181234.3137122	12194849.6129583	0.229307382017909	53181234.3137122	12194849.6129583	4.36095860150678	NHLTAEQYSSLLR	ICPL:13C(6) (N-term)
		B7J909													TRUE	10264	1642.827894	821.917585	0.11943	2	915.46368832	67.24	1	124.1	53181234.3137122	12194849.6129583	0.229307382017909	53181234.3137122	12194849.6129583	4.36095860150678	NHLTAEQYSSLLR	ICPL:13C(6) (N-term)
		B7J909													TRUE	11295	1642.827894	548.280815333333	0.136454	3	1005.02503448	38.32	1	67.6	32835017.3100526	7917190.7001784	0.241120344948151	32835017.3100526	7917190.7001784	4.14730660830397	NHLTAEQYSSLLR	ICPL:13C(6) (N-term)
		B7J909													TRUE	11293	1642.827894	821.917585	0.14203	2	1004.65920141	80.94	1	78	32835017.3100526	7917190.7001784	0.241120344948151	32835017.3100526	7917190.7001784	4.14730660830397	NHLTAEQYSSLLR	ICPL:13C(6) (N-term)
		B7J909													TRUE	12337	1642.827894	821.917585	0.15323	2	1094.90417573	39.22	1	19.7	5418992.89985031	3255775.12657972	0.600808155085358	5418992.89985031	3255775.12657972	1.66442481104127	NHLTAEQYSSLLR	ICPL:13C(6) (N-term)
		B7J909													TRUE	10303	1642.827894	821.917585	1.10783	2	917.85556353	70.78	1	53.3	12892251.9232648	5128921.27593973	0.39782974351318	12892251.9232648	5128921.27593973	2.51363809847182	NHLTAEQYSSLLR	ICPL:13C(6) (N-term)
		B7J909													TRUE	17585	2547.34094	849.785164	-0.845892	3	1553.21703163	53.93	1	3.9	6645672.03190223	4869057.28975638	0.732665901414138	6645672.03190223	4869057.28975638	1.36487858663802	NFAAAVQEIKPLNEQVHTALSR	ICPL:13C(6) (K)
		B7J909													TRUE	645	2646.342267	882.785606333333	0.119081	3	68.69755786	85.69	1	39.6	2379411.68354692	5309637.88406914	0.448130689041155	2379411.68354692	5309637.88406914	2.23149189389295	NFAAAVQEIKPLNEQVHTALSR	ICPL (K); ICPL (N-term)
		B7J909													TRUE	644	2658.382535	886.799029	0.137313	3	68.54213279	49.66	1	34.3	5309637.88406914	2379411.68354692	0.448130689041155	5309637.88406914	2379411.68354692	2.23149189389295	NFAAAVQEIKPLNEQVHTALSR	ICPL:13C(6) (K); ICPL:13C(6) (N-term)
		B7J909													TRUE	1578	2658.382535	886.799029	0.158613	3	158.5574724	41.57	1	28.5	4327885.74604775	1747115.00950432	0.403687877181091	4327885.74604775	1747115.00950432	2.47716133311432	NFAAAVQEIKPLNEQVHTALSR	ICPL:13C(6) (K); ICPL:13C(6) (N-term)
TRUE	5-methyltetrahydropteroyltriglutamate--homocysteine methyltransferase	B7J432	873.709	26.4031	49	23	0.72	0.03	23	1.43	0.05	242210308	3792.8		TRUE	20328	775.409696	388.208486	-0.012172	2	1801.4556238	36.8	1	43.3	12887385.5827118	21035211.0343016	0.612657774704359	12887385.5827118	21035211.0343016	1.63223261221577	VVPAER	ICPL (N-term)
		B7J432													TRUE	20325	781.429838	391.218557	-0.010714	2	1801.3319822	35.56	1	65.7	21035211.0343016	12887385.5827118	0.612657774704359	21035211.0343016	12887385.5827118	1.63223261221577	VVPAER	ICPL:13C(6) (N-term)
		B7J432													TRUE	4551	866.440656	433.723966	0.027068	2	420.68180268	33.42	1	55.7	8519734.77276446	11501879.9264605	0.740725414213767	8519734.77276446	11501879.9264605	1.35002793317337	EGLPLK	ICPL (K); ICPL (N-term)
		B7J432													TRUE	4558	866.440656	866.440656	0.086244	1	420.90012802	38.12	1	25.1	8519734.77276446	11501879.9264605	0.740725414213767	8519734.77276446	11501879.9264605	1.35002793317337	EGLPLK	ICPL (K); ICPL (N-term)
		B7J432													TRUE	4550	878.480924	439.7441	0.0292	2	420.56525283	23.4	1	68.9	11501879.9264605	8519734.77276446	0.740725414213767	11501879.9264605	8519734.77276446	1.35002793317337	EGLPLK	ICPL:13C(6) (K); ICPL:13C(6) (N-term)
		B7J432													TRUE	4552	878.480924	878.480924	0.032176	1	420.66851148	32.22	1	54	11501879.9264605	8519734.77276446	0.740725414213767	11501879.9264605	8519734.77276446	1.35002793317337	EGLPLK	ICPL:13C(6) (K); ICPL:13C(6) (N-term)
		B7J432													TRUE	15915	894.508344	894.508344	0.042356	1	1393.22619922	34.76	1	44.5	37231876.3385898	45622539.5747393	0.816085134357681	37231876.3385898	45622539.5747393	1.22536235240588	LTLLPK	ICPL (K); ICPL (N-term)
		B7J432													TRUE	15918	894.508344	447.75781	0.06338	2	1393.30141627	38.35	1	92.6	37231876.3385898	45622539.5747393	0.816085134357681	37231876.3385898	45622539.5747393	1.22536235240588	LTLLPK	ICPL (K); ICPL (N-term)
		B7J432													TRUE	15914	906.548612	453.777944	1.116912	2	1393.09606588	36.2	1	27.3	45622539.5747393	37231876.3385898	0.816085134357681	45622539.5747393	37231876.3385898	1.22536235240588	LTLLPK	ICPL:13C(6) (K); ICPL:13C(6) (N-term)
		B7J432													TRUE	21168	1005.55882	503.283048	0.791104	2	1879.86636267	28.58	1	27.1							IHNPAVAQR
		B7J432													TRUE	11333	1066.587125	533.7972005	0.085799	2	1007.15040141	36.1	1	90	8961578.78897877	5572723.00798512	0.621846121002544	8961578.78897877	5572723.00798512	1.60811487959078	KSPFPIR	ICPL:13C(6) (K); ICPL:13C(6) (N-term)
		B7J432													TRUE	2924	1069.672773	535.3400245	-0.040649	2	299.14934709	23.86	1	44.4							TALQIALAIR
		B7J432													TRUE	11527	1090.589109	545.7981925	0.046815	2	1018.34440993	58.78	1	4.2	3503221.9126593	4993008.28364243	0.701625495823067	3503221.9126593	4993008.28364243	1.42526177562421	LDEVAIIGR	ICPL (N-term)
		B7J432													TRUE	10484	1090.589109	545.7981925	0.125815	2	928.99467125	58.97	1	34.5	8683097.3404631	10332306.3366596	0.840383265607889	8683097.3404631	10332306.3366596	1.18993326131578	LDEVAIIGR	ICPL (N-term)
		B7J432													TRUE	10482	1090.589109	545.7981925	0.139815	2	928.86834646	64.24	1	71.6	8683097.3404631	10332306.3366596	0.840383265607889	8683097.3404631	10332306.3366596	1.18993326131578	LDEVAIIGR	ICPL (N-term)
		B7J432													TRUE	13647	1100.515943	550.7616095	0.050181	2	1199.08426123	50.69	1	84	13477239.7164467	18969590.3005025	0.710465513643155	13477239.7164467	18969590.3005025	1.40752785433899	ALESFWSR	ICPL (N-term)
		B7J432													TRUE	10055	1100.58473	550.796003	0.058394	2	903.35417152	36.43	1	69.5							TSVHSLGFPR
		B7J432													TRUE	10060	1100.58473	367.533094	0.141918	3	903.4401214	23.46	1	40.5							TSVHSLGFPR
		B7J432													TRUE	13645	1106.536085	553.7716805	-1.026761	2	1199.0722111	51.63	1	8.1	18969590.3005025	13477239.7164467	0.710465513643155	18969590.3005025	13477239.7164467	1.40752785433899	ALESFWSR	ICPL:13C(6) (N-term)
		B7J432													TRUE	13627	1106.536085	553.7716805	1.152039	2	1198.36688629	41.18	1	51.7	5251027.90353429	3359956.40228985	0.639866415493313	5251027.90353429	3359956.40228985	1.56282620213633	ALESFWSR	ICPL:13C(6) (N-term)
		B7J432													TRUE	5203	1110.580274	555.793775	0.14885	2	486.5235848	45.54	1	116.3	18696875.275585	27747795.333111	0.673814804063885	18696875.275585	27747795.333111	1.484087309998	IHNPAVAQR	ICPL (N-term)
		B7J432													TRUE	5202	1116.600416	558.803846	0.118508	2	486.38960186	36.44	1	91.4	27747795.333111	18696875.275585	0.673814804063885	27747795.333111	18696875.275585	1.484087309998	IHNPAVAQR	ICPL:13C(6) (N-term)
		B7J432													TRUE	13615	1119.61569	560.311483	0.173634	2	1197.21575297	84.24	1	72.8	13313355.3347265	15910057.9565401	0.836788613284333	13313355.3347265	15910057.9565401	1.19504494220479	VLSLGVVDGR	ICPL (N-term)
		B7J432													TRUE	13614	1125.635831	563.3215535	0.147093	2	1197.09118602	74.8	1	61.1	15910057.9565401	13313355.3347265	0.836788613284333	15910057.9565401	13313355.3347265	1.19504494220479	VLSLGVVDGR	ICPL:13C(6) (N-term)
		B7J432													TRUE	3325	1164.527982	582.767629	0.150742	2	320.68617215	74.07	1	23.8	14614539.2650457	23296913.3677843	0.627316547661425	14614539.2650457	23296913.3677843	1.5940915375625	LEGLGQDDGR	ICPL (N-term)
		B7J432													TRUE	12254	1205.606183	603.3067295	0.061341	2	1090.45784186	58.21	1	4.5	4446179.1823293	7776972.6017194	0.571710794165109	4446179.1823293	7776972.6017194	1.7491361195311	TSVHSLGFPR	ICPL (N-term)
		B7J432													TRUE	12255	1205.606183	402.540245	0.061365	3	1090.47327547	21.3	1	1.8	4446179.1823293	7776972.6017194	0.571710794165109	4446179.1823293	7776972.6017194	1.7491361195311	TSVHSLGFPR	ICPL (N-term)
		B7J432													TRUE	12256	1205.606183	603.3067295	0.081141	2	1090.55779226	31.51	1	23.2	4446179.1823293	7776972.6017194	0.571710794165109	4446179.1823293	7776972.6017194	1.7491361195311	TSVHSLGFPR	ICPL (N-term)
		B7J432													TRUE	11214	1205.606183	402.540245	0.113865	3	1000.45217634	28.11	1	4.5	24580190.2369204	35472436.3693948	0.692937749777117	24580190.2369204	35472436.3693948	1.44313107536954	TSVHSLGFPR	ICPL (N-term)
		B7J432													TRUE	11215	1205.606183	603.3067295	0.113941	2	1000.44049314	48.64	1	151.8	24580190.2369204	35472436.3693948	0.692937749777117	24580190.2369204	35472436.3693948	1.44313107536954	TSVHSLGFPR	ICPL (N-term)
		B7J432													TRUE	11218	1211.626325	606.3168005	1.132599	2	1000.69896782	39.08	1	168.7	35472436.3693948	24580190.2369204	0.692937749777117	35472436.3693948	24580190.2369204	1.44313107536954	TSVHSLGFPR	ICPL:13C(6) (N-term)
		B7J432													TRUE	8528	1281.575941	641.2916085	0.112383	2	762.1949102	54.11	1	41.3	18404682.1518559	36174431.2244549	0.508775992569409	18404682.1518559	36174431.2244549	1.965501546073	HGWVQSYGSR	ICPL (N-term)
		B7J432													TRUE	8525	1287.596082	644.301679	0.151442	2	761.96851874	58.38	1	97.6	36174431.2244549	18404682.1518559	0.508775992569409	36174431.2244549	18404682.1518559	1.965501546073	HGWVQSYGSR	ICPL:13C(6) (N-term)
		B7J432													TRUE	320	1351.612409	676.3098425	0.202315	2	45.2062912	81.39	1	42.1	986581.765039435	1513951.21616349	0.651660208404561	986581.765039435	1513951.21616349	1.53454206210974	EIDEQELQSR	ICPL (N-term)
		B7J432													TRUE	18437	1351.612409	676.3098425	0.278515	2	1628.93390003	83.61	1	562.8	41461728.2554754	62347413.891507	0.665011195614697	41461728.2554754	62347413.891507	1.50373408236482	EIDEQELQSR	ICPL (N-term)
		B7J432													TRUE	317	1357.632551	679.3199135	0.179573	2	45.1046576	57.88	1	79.9	1513951.21616349	986581.765039435	0.651660208404561	1513951.21616349	986581.765039435	1.53454206210974	EIDEQELQSR	ICPL:13C(6) (N-term)
		B7J432													TRUE	18435	1357.632551	679.3199135	0.228773	2	1628.84859977	59.41	1	726.7	62347413.891507	41461728.2554754	0.665011195614697	62347413.891507	41461728.2554754	1.50373408236482	EIDEQELQSR	ICPL:13C(6) (N-term)
		B7J432													TRUE	15625	1371.783872	686.395574	0.305652	2	1374.19014107	47.57	1	59.8	13307082.4624021	10837616.0689679	0.814424656913979	13307082.4624021	10837616.0689679	1.2278606639799	ALPVAGVHLDLR	ICPL:13C(6) (N-term)
		B7J432													TRUE	13872	1425.66197	713.334623	1.134954	2	1214.42617802	46.08	1	50.2	33991076.9367871	32299283.8337872	1.0523786568057	33991076.9367871	32299283.8337872	0.950228317091979	LWINPDCGLK	ICPL (K); ICPL (N-term)
		B7J432													TRUE	7627	1522.76486	761.886068	-0.818136	2	682.91330952	34.59	1	18.6	12926503.7165826	17479704.0457205	0.739515021694397	12926503.7165826	17479704.0457205	1.35223757552453	LGIDVPVHGEPER	ICPL (N-term)
		B7J432													TRUE	7613	1528.785001	764.8961385	0.160523	2	682.59120178	39	1	27.2	17479704.0457205	12926503.7165826	0.739515021694397	17479704.0457205	12926503.7165826	1.35223757552453	LGIDVPVHGEPER	ICPL:13C(6) (N-term)
		B7J432													TRUE	7814	1534.74957	767.878423	0.212954	2	693.90126791	99.06	1	74.3	18978213.4011036	27285684.7934034	0.695537368579873	18978213.4011036	27285684.7934034	1.43773727361589	EGVESVAQELAAAR	ICPL (N-term)
		B7J432													TRUE	7812	1540.769712	770.888494	0.189212	2	693.77644285	71.17	1	56.3	27285684.7934034	18978213.4011036	0.695537368579873	27285684.7934034	18978213.4011036	1.43773727361589	EGVESVAQELAAAR	ICPL:13C(6) (N-term)
		B7J432													TRUE	3362	1585.741559	793.3744175	0.081765	2	322.62004683	52.81	1	34.8	19751681.3509552	10967070.6865595	0.555247449150911	19751681.3509552	10967070.6865595	1.80099881868743	KGELSNADYQK	2 ICPL:13C(6) (K); ICPL:13C(6) (N-term)
		B7J432													TRUE	15937	1859.896268	930.451772	1.116256	2	1394.51504935	72.46	1	59.1	23927088.2836737	29586092.2948385	0.808727561762118	23927088.2836737	29586092.2948385	1.23651034944465	VLLATYFDSVADHAK	ICPL (K); ICPL (N-term)
		B7J432													TRUE	15934	1871.936536	936.471906	1.071188	2	1394.39397468	78.23	1	42.2	29586092.2948385	23927088.2836737	0.808727561762118	29586092.2948385	23927088.2836737	1.23651034944465	VLLATYFDSVADHAK	ICPL:13C(6) (K); ICPL:13C(6) (N-term)
		B7J432													TRUE	1733	2556.332441	852.782331	0.201207	3	168.93225588	24.57	1	40.9	9378534.2553803	8642898.29891436	0.92156173486876	9378534.2553803	8642898.29891436	1.08511449875077	FKLPAFPTTSIGSFPQTPEIR	ICPL:13C(6) (K); ICPL:13C(6) (N-term)
TRUE	Pyruvate dehydrogenase complex, E2 and E3 components	B7JAH7	836.43	21.4649	32	20	0.3	0.03	20	4.17	0.46	131282419	1775.7		TRUE	18152	515.25723	515.25723	1.01287	1	1609.88354163	21.41	1	23.8							APGDR
		B7JAH7													TRUE	6416	798.456388	399.731832	0.058936	2	585.04469169	38.54	1	23.9	20962317.1647697	4522059.04337241	0.215723243180978	20962317.1647697	4522059.04337241	4.63556909888038	GILQTR	ICPL:13C(6) (N-term)
		B7JAH7													TRUE	20416	803.376111	803.376111	0.013889	1	1806.40564033	20.06	1	24.8	6924269.76612649		0.01	6924269.76612649		100	YEAAK	ICPL:13C(6) (K); ICPL:13C(6) (N-term)
		B7JAH7													TRUE	6488	948.489744	474.74851	1.05978	2	589.0394165	21.04	1	53.8	15993676.8594882	26711639.4897561	0.598753096590037	15993676.8594882	26711639.4897561	1.67013750024026	GVDINGLR	ICPL (N-term)
		B7JAH7													TRUE	20208	964.505445	482.7563605	0.061879	2	1794.88299073	65.67	1	118.2	16551521.3838473	3293993.00768067	0.199014515420636	16551521.3838473	3293993.00768067	5.02475911310491	AASQALHR	ICPL:13C(6) (N-term)
		B7JAH7													TRUE	21237	964.505445	482.7563605	0.119079	2	1884.13080427	69.48	1	84.5	5275495.4910364		0.01	5275495.4910364		100	AASQALHR	ICPL:13C(6) (N-term)
		B7JAH7													TRUE	5178	992.536741	496.7720085	0.084583	2	485.16557679	53.67	1	124.9	25803272.2221749	5097308.18971096	0.197545030173747	25803272.2221749	5097308.18971096	5.06213696755857	AIAHNSLR	ICPL:13C(6) (N-term)
		B7JAH7													TRUE	4522	1041.544248	521.275762	0.031476	2	418.5382859	25.62	1	52.4	20220178.7750774	3513284.11051736	0.173751387146374	20220178.7750774	3513284.11051736	5.75534973517977	AEPYVIK	ICPL:13C(6) (K); ICPL:13C(6) (N-term)
		B7JAH7													TRUE	9484	1052.541105	526.7741905	0.075619	2	842.52904217	27.44	1	17	2848027.40995226	13124693.2135267	0.216997636715576	2848027.40995226	13124693.2135267	4.60834511903336	VPLSIDAK	ICPL (K); ICPL (N-term)
		B7JAH7													TRUE	10535	1064.581373	532.7943245	0.105351	2	932.59822965	40.57	1	17.3	7899378.02879982	2188247.5009174	0.277015164097656	7899378.02879982	2188247.5009174	3.60991068217288	VPLSIDAK	ICPL:13C(6) (K); ICPL:13C(6) (N-term)
		B7JAH7													TRUE	9470	1064.581373	532.7943245	0.122551	2	841.77974988	36.5	1	36.5	13124693.2135267	2848027.40995226	0.216997636715576	13124693.2135267	2848027.40995226	4.60834511903336	VPLSIDAK	ICPL:13C(6) (K); ICPL:13C(6) (N-term)
		B7JAH7													TRUE	9477	1064.581373	532.7943245	0.129751	2	842.34849977	45.85	1	41.2	13124693.2135267	2848027.40995226	0.216997636715576	13124693.2135267	2848027.40995226	4.60834511903336	VPLSIDAK	ICPL:13C(6) (K); ICPL:13C(6) (N-term)
		B7JAH7													TRUE	13669	1153.600004	577.30364	1.19732	2	1200.51568628	91.18	1	12.5	3982033.91195251	22495268.2194484	0.177016511788458	3982033.91195251	22495268.2194484	5.64919051842486	IQVLEGYAR	ICPL (N-term)
		B7JAH7													TRUE	13661	1159.620145	580.3137105	0.192979	2	1200.14729429	52.78	1	117.4	22495268.2194484	3982033.91195251	0.177016511788458	22495268.2194484	3982033.91195251	5.64919051842486	IQVLEGYAR	ICPL:13C(6) (N-term)
		B7JAH7													TRUE	3524	1169.569807	585.2885415	0.137717	2	332.83898016	66.08	1	14	2720436.2306499	2238186.42145957	0.822730706290024	2720436.2306499	2238186.42145957	1.21546454065066	EVAEQLMK	ICPL:13C(6) (K); ICPL:13C(6) (N-term)
		B7JAH7													TRUE	21721	1252.624692	626.815984	0.169032	2	1912.47436267	63.37	1	68.7	27622848.9381693	5430319.08385137	0.196587944133009	27622848.9381693	5430319.08385137	5.08678192047938	AEGIDAVEVK	ICPL:13C(6) (K); ICPL:13C(6) (N-term)
		B7JAH7													TRUE	13404	1257.669813	629.3385445	0.144711	2	1184.9826111	85.33	1	40.8	6554462.76087989	37768117.9876052	0.173544860324545	6554462.76087989	37768117.9876052	5.76219888119939	VAAASLLGHSAR	ICPL (N-term)
		B7JAH7													TRUE	13402	1263.689954	632.348615	0.14397	2	1184.85956149	88.83	1	283	37768117.9876052	6554462.76087989	0.173544860324545	37768117.9876052	6554462.76087989	5.76219888119939	VAAASLLGHSAR	ICPL:13C(6) (N-term)
		B7JAH7													TRUE	14439	1263.689954	632.348615	1.18817	2	1274.95368932	79.44	1	56.5	10068506.9249873	1680113.46454756	0.16686818383945	10068506.9249873	1680113.46454756	5.99275414276778	VAAASLLGHSAR	ICPL:13C(6) (N-term)
		B7JAH7													TRUE	11421	1400.670545	700.8389105	0.173779	2	1012.09629315	41.47	1	17.4	3216651.72155716	14436220.83232	0.222818129406533	3216651.72155716	14436220.83232	4.48796515195357	LDWAQLEQHR	ICPL (N-term)
		B7JAH7													TRUE	11419	1406.690687	469.568413	0.096261	3	1012.01311822	46.57	1	34.6	14436220.83232	3216651.72155716	0.222818129406533	14436220.83232	3216651.72155716	4.48796515195357	LDWAQLEQHR	ICPL:13C(6) (N-term)
		B7JAH7													TRUE	11418	1406.690687	703.8489815	0.175837	2	1011.86895181	65.91	1	109.5	14436220.83232	3216651.72155716	0.222818129406533	14436220.83232	3216651.72155716	4.48796515195357	LDWAQLEQHR	ICPL:13C(6) (N-term)
		B7JAH7													TRUE	14393	1579.762876	527.259142666667	0.435172	3	1271.88470584	21.88	1	25.7	1914117.19212905	956227.019994892	0.499565556344694	1914117.19212905	956227.019994892	2.00173928586464	EHDAAMGITLGTPR	ICPL:13C(6) (N-term)
		B7JAH7													TRUE	5497	1593.832685	797.4199805	0.031239	2	502.67111013	65.4	1	104.6	43514163.1652202	10364232.5757843	0.238180670887132	43514163.1652202	10364232.5757843	4.1984935061077	VTEVAGQPGQLEVR	ICPL:13C(6) (N-term)
		B7JAH7													TRUE	9246	1673.847318	837.427297	0.127206	2	826.84968377	65.56	1	27.1	22101721.8993691	9891620.23116518	0.447549755453557	22101721.8993691	9891620.23116518	2.23438844020053	HPLVNAAYQPVDK	ICPL:13C(6) (K); ICPL:13C(6) (N-term)
		B7JAH7													TRUE	15788	1819.975675	910.4914755	0.068249	2	1383.75948294	81.06	1	43.8	18825879.6490938	4642742.11664938	0.246614883510788	18825879.6490938	4642742.11664938	4.05490530727136	GTGPAGVIVAADVLGAAGGR	ICPL:13C(6) (N-term)
		B7JAH7													TRUE	15791	1819.975675	607.330075666667	0.411973	3	1383.91643334	68.11	1	36.7	18825879.6490938	4642742.11664938	0.246614883510788	18825879.6490938	4642742.11664938	4.05490530727136	GTGPAGVIVAADVLGAAGGR	ICPL:13C(6) (N-term)
		B7JAH7													TRUE	14549	1965.024381	655.679644333333	0.241667	3	1281.11344718	25.06	1	22.7	5227793.20846067	2842066.07341932	0.543645465704289	5227793.20846067	2842066.07341932	1.83943408541908	RPDTSGLNLAAAGVALGDR	ICPL:13C(6) (N-term)
		B7JAH7													TRUE	13506	1965.024381	655.679644333333	0.251267	3	1191.05136949	71.15	1	51.3	18764058.7650071	4795765.57135128	0.255582527821478	18764058.7650071	4795765.57135128	3.91263052495705	RPDTSGLNLAAAGVALGDR	ICPL:13C(6) (N-term)
		B7JAH7													TRUE	2454	2936.456769	979.490440333333	0.244979	3	245.04992031	98.09	1	39.2	2135624.97579538	411511.323369699	0.192688944938209	2135624.97579538	411511.323369699	5.18971132630715	TNVPHIYAVGDVIGGYMLAHTAGQQGR	ICPL:13C(6) (N-term)
TRUE	Sulfite reductase [NADPH] flavoprotein alpha-component	B7JAM5	815.503	37.0748	36	22	0.16	0.01	22	6.99	0.5	164118231	2059.3		TRUE	5273	756.409437	756.409437	0.039163	1	490.34722693	25.11	1	101	25642672.1274765	3447800.3613138	0.134455580298881	25642672.1274765	3447800.3613138	7.43740049893877	VNLSGR	ICPL:13C(6) (N-term)
		B7JAM5													TRUE	5274	756.409437	378.7083565	0.039287	2	490.37059333	38.47	1	77.6	25642672.1274765	3447800.3613138	0.134455580298881	25642672.1274765	3447800.3613138	7.43740049893877	VNLSGR	ICPL:13C(6) (N-term)
		B7JAM5													TRUE	5430	890.44621	890.44621	0.04109	1	498.71347652	28.96	1	79.3	56459747.0721771	7848064.51210072	0.139002828016001	56459747.0721771	7848064.51210072	7.19409823723076	SFLQER	ICPL:13C(6) (N-term)
		B7JAM5													TRUE	5433	890.44621	445.726743	0.061914	2	499.02586	35.36	1	7.4	56459747.0721771	7848064.51210072	0.139002828016001	56459747.0721771	7848064.51210072	7.19409823723076	SFLQER	ICPL:13C(6) (N-term)
		B7JAM5													TRUE	11436	918.477521	918.477521	0.019179	1	1013.01285102	26.76	1	83.6	18456335.1975131	2633812.01302816	0.142705037855135	18456335.1975131	2633812.01302816	7.00746108918129	LDVAFSR	ICPL:13C(6) (N-term)
		B7JAM5													TRUE	11435	918.477521	459.7423985	0.048003	2	1012.92506808	51.31	1	100.9	18456335.1975131	2633812.01302816	0.142705037855135	18456335.1975131	2633812.01302816	7.00746108918129	LDVAFSR	ICPL:13C(6) (N-term)
		B7JAM5													TRUE	4438	976.492551	488.7499135	0.147773	2	413.63563629	44.95	1	48.9	15924748.0171463	2435058.75235188	0.152910347449771	15924748.0171463	2435058.75235188	6.53977979043236	LELDHK	ICPL:13C(6) (K); ICPL:13C(6) (N-term)
		B7JAM5													TRUE	7518	997.552061	997.552061	0.030139	1	677.15535164	37.49	1	39.6	35370797.6441441	4294074.32925013	0.12140168204437	35370797.6441441	4294074.32925013	8.23711816146435	ALQSAIAGR	ICPL:13C(6) (N-term)
		B7JAM5													TRUE	7516	997.552061	499.2796685	0.046463	2	677.06015965	80.54	1	60.2	35370797.6441441	4294074.32925013	0.12140168204437	35370797.6441441	4294074.32925013	8.23711816146435	ALQSAIAGR	ICPL:13C(6) (N-term)
		B7JAM5													TRUE	19288	1010.50926	505.758268	1.087864	2	1710.78798537	39.62	1	34.7	12623557.7895392	1503644.6788201	0.119114175566743	12623557.7895392	1503644.6788201	8.39530639608611	KQEDLR	ICPL:13C(6) (K); ICPL:13C(6) (N-term)
		B7JAM5													TRUE	15574	1123.667737	562.3375065	0.125787	2	1370.92765788	65.2	1	65.4	7069063.66249136	709539.785430593	0.100372527297417	7069063.66249136	709539.785430593	9.96288553178369	RLAELLAAR	ICPL:13C(6) (N-term)
		B7JAM5													TRUE	19590	1141.516004	571.26164	1.06192	2	1729.4220355	46.98	1	10.6	1305095.56863318	11973330.0120539	0.109000216925392	1305095.56863318	11973330.0120539	9.17429366846556	IQEDIGEK	ICPL (K); ICPL (N-term)
		B7JAM5													TRUE	20632	1141.516004	571.26164	1.16732	2	1819.50873206	27.54	1	16.1	1987624.1022225	19808726.0973086	0.100340834259531	1987624.1022225	19808726.0973086	9.96603234744394	IQEDIGEK	ICPL (K); ICPL (N-term)
		B7JAM5													TRUE	6482	1143.598417	572.3028465	0.110507	2	588.4723413	48.52	1	37	19262054.5669029	3350047.67901765	0.17391954048214	19262054.5669029	3350047.67901765	5.74978520083367	KIYVQDR	ICPL:13C(6) (K); ICPL:13C(6) (N-term)
		B7JAM5													TRUE	20629	1153.556272	577.281774	0.160252	2	1819.1737742	42.22	1	104.6	19808726.0973086	1987624.1022225	0.100340834259531	19808726.0973086	1987624.1022225	9.96603234744394	IQEDIGEK	ICPL:13C(6) (K); ICPL:13C(6) (N-term)
		B7JAM5													TRUE	19581	1153.556272	577.281774	0.226252	2	1728.84032724	50.03	1	96.5	11973330.0120539	1305095.56863318	0.109000216925392	11973330.0120539	1305095.56863318	9.17429366846556	IQEDIGEK	ICPL:13C(6) (K); ICPL:13C(6) (N-term)
		B7JAM5													TRUE	6641	1195.574201	598.2907385	0.201723	2	597.44758289	61.39	1	48.5	7889306.057272	54008897.4166517	0.146074192117086	7889306.057272	54008897.4166517	6.84583625284366	QSDFLLDPR	ICPL (N-term)
		B7JAM5													TRUE	6638	1201.594343	601.3008095	0.145181	2	597.45044156	76.62	1	74.9	54008897.4166517	7889306.057272	0.146074192117086	54008897.4166517	7889306.057272	6.84583625284366	QSDFLLDPR	ICPL:13C(6) (N-term)
		B7JAM5													TRUE	15809	1260.667844	630.83756	1.18168	2	1385.11174107	81.89	1	62.5	17477982.5290925	2291556.35399827	0.131111033563738	17477982.5290925	2291556.35399827	7.62712315522905	LGVASTFLADR	ICPL:13C(6) (N-term)
		B7JAM5													TRUE	289	1281.514783	641.2610295	0.187141	2	43.02697439	53.1	1	24.4	598154.223140282	156853.273826056	0.262228816178181	598154.223140282	156853.273826056	3.81346342699618	VDCDVDYER	ICPL:13C(6) (N-term)
		B7JAM5													TRUE	18408	1281.514783	641.2610295	1.143541	2	1626.74335016	54.7	1	151.2	16600720.1443822	1590231.256519	0.0957929079394271	16600720.1443822	1590231.256519	10.4391861726583	VDCDVDYER	ICPL:13C(6) (N-term)
		B7JAM5													TRUE	12241	1313.627317	657.3172965	0.167007	2	1089.86252559	55.7	1	24.6							HFSTDFLYQR
		B7JAM5													TRUE	10480	1402.705656	701.856466	0.131668	2	928.73362166	83.82	1	54.2	17251977.0599661	3461431.07018919	0.200639674986676	17251977.0599661	3461431.07018919	4.98405911027521	AFDIALASAGAER	ICPL:13C(6) (N-term)
		B7JAM5													TRUE	4485	1459.654401	730.3308385	0.138523	2	416.45382776	80.21	1	70.8	21503574.1993442	5131320.46903492	0.238626398638019	21503574.1993442	5131320.46903492	4.19065118405838	DVNGLDTWTDGR	ICPL:13C(6) (N-term)
		B7JAM5													TRUE	21683	1459.654401	730.3308385	1.070723	2	1909.7087456	41.61	1	56	5333207.62844621	1944108.68648563	0.364528970542262	5333207.62844621	1944108.68648563	2.74326618954985	DVNGLDTWTDGR	ICPL:13C(6) (N-term)
		B7JAM5													TRUE	12629	1515.803342	758.405309	0.108782	2	1111.04035013	58.59	1	49.5	23370531.1531761	3212715.14905829	0.137468640656961	23370531.1531761	3212715.14905829	7.27438632709983	SSPAVPFPAPVPK	ICPL:13C(6) (K); ICPL:13C(6) (N-term)
		B7JAM5													TRUE	11692	1581.835035	791.4211555	0.096089	2	1030.17498488	75.89	1	69.1	10733177.4607703	1786911.77620601	0.166484881363153	10733177.4607703	1786911.77620601	6.00655141663407	EVIDIVGQYPVK	ICPL:13C(6) (K); ICPL:13C(6) (N-term)
		B7JAM5													TRUE	475	1684.876539	842.9419075	0.086785	2	56.16657492	40.94	1	26	1339501.34101515	11201789.1246355	0.119579232041537	1339501.34101515	11201789.1246355	8.36265614795586	AVHQSLVDIVQSAGR	ICPL (N-term)
		B7JAM5													TRUE	473	1690.89668	845.951978	0.086644	2	55.98983305	63.4	1	112	11201789.1246355	1339501.34101515	0.119579232041537	11201789.1246355	1339501.34101515	8.36265614795586	AVHQSLVDIVQSAGR	ICPL:13C(6) (N-term)
		B7JAM5													TRUE	17540	1690.89668	564.303744	0.315168	3	1550.31393137	66.7	1	26.6	24150678.0808541	4445580.22741064	0.184076828506731	24150678.0808541	4445580.22741064	5.43251428282531	AVHQSLVDIVQSAGR	ICPL:13C(6) (N-term)
		B7JAM5													TRUE	17542	1690.89668	845.951978	1.076444	2	1550.44525617	61.62	1	36.1	24150678.0808541	4445580.22741064	0.184076828506731	24150678.0808541	4445580.22741064	5.43251428282531	AVHQSLVDIVQSAGR	ICPL:13C(6) (N-term)
		B7JAM5													TRUE	15849	1848.875928	924.941602	0.997996	2	1387.53214162	76.41	1	15.5	1996789.5778821		0.01	1996789.5778821		100	EALGAAGNNWLFFGDR	ICPL:13C(6) (N-term)
		B7JAM5													TRUE	15749	1897.963422	949.485349	1.028902	2	1381.02396614	58.73	1	40.8	20697941.9246871	3614932.63418588	0.17465179133942	20697941.9246871	3614932.63418588	5.72567846187499	QGYSSHATFPAVLLGK	ICPL:13C(6) (K); ICPL:13C(6) (N-term)
TRUE	DNA-binding protein HU	B7J794	766.154	76.6667	53	18	0.85	0.11	18	1.55	0.2	207554154	3664.3		TRUE	4515	928.441038	464.724157	0.012886	2	418.51796109	37.41	1	21.7	6996406.4109997	12365998.6220392	0.565777712325667	6996406.4109997	12365998.6220392	1.76747860195735	SELIEK	ICPL (K); ICPL (N-term)
		B7J794													TRUE	3449	928.441038	464.724157	0.022286	2	327.92313003	45.02	1	397.6	83781626.7400576	149481159.842811	0.56048285167281	83781626.7400576	149481159.842811	1.78417590656951	SELIEK	ICPL (K); ICPL (N-term)
		B7J794													TRUE	3450	928.441038	928.441038	0.025762	1	328.00489643	35.2	1	65.2	83781626.7400576	149481159.842811	0.56048285167281	83781626.7400576	149481159.842811	1.78417590656951	SELIEK	ICPL (K); ICPL (N-term)
		B7J794													TRUE	3464	928.441038	464.724157	0.142486	2	328.91700522	35.88	1	57.2							SELIEK	ICPL (K); ICPL (N-term)
		B7J794													TRUE	3600	940.481306	470.744291	-0.909182	2	339.80072149	23.28	1	7.9	583973.819198055	396095.228303627	0.678275661137629	583973.819198055	396095.228303627	1.47432682211059	SELIEK	ICPL:13C(6) (K); ICPL:13C(6) (N-term)
		B7J794													TRUE	3448	940.481306	940.481306	0.001094	1	327.87616362	43.11	1	211.1	149481159.842811	83781626.7400576	0.56048285167281	149481159.842811	83781626.7400576	1.78417590656951	SELIEK	ICPL:13C(6) (K); ICPL:13C(6) (N-term)
		B7J794													TRUE	3447	940.481306	470.744291	0.001218	2	327.85448842	37.65	1	255.9	149481159.842811	83781626.7400576	0.56048285167281	149481159.842811	83781626.7400576	1.78417590656951	SELIEK	ICPL:13C(6) (K); ICPL:13C(6) (N-term)
		B7J794													TRUE	4518	940.481306	470.744291	0.012618	2	418.47431949	44.17	1	71.1	12365998.6220392	6996406.4109997	0.565777712325667	12365998.6220392	6996406.4109997	1.76747860195735	SELIEK	ICPL:13C(6) (K); ICPL:13C(6) (N-term)
		B7J794													TRUE	3494	940.481306	470.744291	0.059218	2	330.70994656	29.36	1	17.1	2006063.85362844		0.01	2006063.85362844		100	SELIEK	ICPL:13C(6) (K); ICPL:13C(6) (N-term)
		B7J794													TRUE	3463	940.481306	940.481306	0.074594	1	328.74063829	28.02	1	39.7							SELIEK	ICPL:13C(6) (K); ICPL:13C(6) (N-term)
		B7J794													TRUE	3461	940.481306	470.744291	0.105418	2	328.77650496	41.75	1	111.8							SELIEK	ICPL:13C(6) (K); ICPL:13C(6) (N-term)
		B7J794													TRUE	3662	940.481306	470.744291	0.149418	2	344.5060799	22.3	1	15.4	609105.541669953	361842.013843595	0.594054706597401	609105.541669953	361842.013843595	1.68334664954976	SELIEK	ICPL:13C(6) (K); ICPL:13C(6) (N-term)
		B7J794													TRUE	3568	940.481306	470.744291	1.093218	2	336.4155135	23.47	1	2.9							SELIEK	ICPL:13C(6) (K); ICPL:13C(6) (N-term)
		B7J794													TRUE	6699	955.488355	478.2478155	0.045769	2	601.70956689	43.13	1	42.8	88602324.7470032	157976805.279568	0.560856542137344	88602324.7470032	157976805.279568	1.78298713640594	VVTDALK	ICPL (K); ICPL (N-term)
		B7J794													TRUE	6700	955.488355	955.488355	0.066145	1	601.8083829	35.14	1	86.6	88602324.7470032	157976805.279568	0.560856542137344	88602324.7470032	157976805.279568	1.78298713640594	VVTDALK	ICPL (K); ICPL (N-term)
		B7J794													TRUE	6716	955.488355	478.2478155	0.066369	2	602.81848315	56.35	1	83.7	88602324.7470032		100	88602324.7470032		0.01	VVTDALK	ICPL (K); ICPL (N-term)
		B7J794													TRUE	6718	955.488355	955.488355	0.109945	1	602.95327462	30.03	1	59.8	88602324.7470032		100	88602324.7470032		0.01	VVTDALK	ICPL (K); ICPL (N-term)
		B7J794													TRUE	6696	967.528623	967.528623	-0.004123	1	601.59064102	35.29	1	49.9	157976805.279568	88602324.7470032	0.560856542137344	157976805.279568	88602324.7470032	1.78298713640594	VVTDALK	ICPL:13C(6) (K); ICPL:13C(6) (N-term)
		B7J794													TRUE	6697	967.528623	484.2679495	-0.004099	2	601.60166608	53.26	1	40.2	157976805.279568	88602324.7470032	0.560856542137344	157976805.279568	88602324.7470032	1.78298713640594	VVTDALK	ICPL:13C(6) (K); ICPL:13C(6) (N-term)
		B7J794													TRUE	6714	967.528623	967.528623	0.061777	1	602.71349169	34.4	1	138.8							VVTDALK	ICPL:13C(6) (K); ICPL:13C(6) (N-term)
		B7J794													TRUE	6715	967.528623	484.2679495	0.061901	2	602.70194982	41.19	1	59.6							VVTDALK	ICPL:13C(6) (K); ICPL:13C(6) (N-term)
		B7J794													TRUE	6735	967.528623	967.528623	0.081377	1	603.9529829	34.81	1	21.3							VVTDALK	ICPL:13C(6) (K); ICPL:13C(6) (N-term)
		B7J794													TRUE	7794	967.528623	967.528623	0.098177	1	692.53695964	41.84	1	23.4	5777830.76747658	3259146.48572064	0.564077872281477	5777830.76747658	3259146.48572064	1.77280487170218	VVTDALK	ICPL:13C(6) (K); ICPL:13C(6) (N-term)
		B7J794													TRUE	19403	1050.521421	525.7643485	0.084103	2	1717.10101898	71.73	1	151.1	43155892.2802342	82072477.9201333	0.52582660319127	43155892.2802342	82072477.9201333	1.9017676053873	IAEEAGVTR	ICPL (N-term)
		B7J794													TRUE	20438	1050.521421	525.7643485	1.083703	2	1807.47720726	71.68	1	118.1	88549696.4466783	152908308.582323	0.579103236885294	88549696.4466783	152908308.582323	1.7268078233831	IAEEAGVTR	ICPL (N-term)
		B7J794													TRUE	19716	1056.541562	528.774419	-0.611438	2	1739.91960992	33.06	1	4.5							IAEEAGVTR	ICPL:13C(6) (N-term)
		B7J794													TRUE	21478	1056.541562	528.774419	0.073562	2	1897.17061228	56.38	1	38.3	15667569.596009	7814534.49249499	0.498771327908163	15667569.596009	7814534.49249499	2.00492679519887	IAEEAGVTR	ICPL:13C(6) (N-term)
		B7J794													TRUE	19401	1056.541562	528.774419	0.086162	2	1716.98720191	55.09	1	134.5	82072477.9201333	43155892.2802342	0.52582660319127	82072477.9201333	43155892.2802342	1.9017676053873	IAEEAGVTR	ICPL:13C(6) (N-term)
		B7J794													TRUE	20435	1056.541562	528.774419	0.136962	2	1807.36074059	57.38	1	228.7	152908308.582323	88549696.4466783	0.579103236885294	152908308.582323	88549696.4466783	1.7268078233831	IAEEAGVTR	ICPL:13C(6) (N-term)
		B7J794													TRUE	20782	1056.541562	528.774419	0.159362	2	1830.57710752	44.38	1	10.7							IAEEAGVTR	ICPL:13C(6) (N-term)
		B7J794													TRUE	20817	1056.541562	528.774419	0.192762	2	1832.80135765	28.03	1	8.7							IAEEAGVTR	ICPL:13C(6) (N-term)
		B7J794													TRUE	20702	1056.541562	528.774419	1.108362	2	1824.72816566	32.71	1	11	158064.711537336	464569.640996733	2.93911042179076	158064.711537336	464569.640996733	0.340239003130313	IAEEAGVTR	ICPL:13C(6) (N-term)
		B7J794													TRUE	20852	1056.541562	528.774419	1.132562	2	1836.03008246	44.57	1	9.4							IAEEAGVTR	ICPL:13C(6) (N-term)
		B7J794													TRUE	19693	1056.541562	528.774419	1.169562	2	1738.49388512	32.55	1	9	110191.011677766	297720.752860731	2.70186059940499	110191.011677766	297720.752860731	0.370115319872617	IAEEAGVTR	ICPL:13C(6) (N-term)
		B7J794													TRUE	14377	1202.61807	601.812673	0.235254	2	1270.98966425	24.21	1	80.6	5814997.13933788		0.01	5814997.13933788		100	MNKSELIEK	ICPL:13C(6) (K)
		B7J794													TRUE	19406	1329.654584	443.889712	-0.474636	3	1717.45197685	32.4	1	125.5	18275857.3829702	7568045.12263954	0.414100688359036	18275857.3829702	7568045.12263954	2.41487161966023	MNKSELIEK	2 ICPL:13C(6) (K); Oxidation (M)
		B7J794													TRUE	9328	1376.695707	459.570086333333	0.112241	3	831.45319148	52.73	1	19.2	115509592.119138	200081070.738978	0.577313944255276	115509592.119138	200081070.738978	1.73215978922869	AAAGHTLDALVK	ICPL (K); ICPL (N-term)
		B7J794													TRUE	9324	1376.695707	688.8514915	0.129817	2	831.40056643	64.33	1	268.7	115509592.119138	200081070.738978	0.577313944255276	115509592.119138	200081070.738978	1.73215978922869	AAAGHTLDALVK	ICPL (K); ICPL (N-term)
		B7J794													TRUE	9321	1388.735975	694.8716255	0.128749	2	831.31960856	58.02	1	299.1	200081070.738978	115509592.119138	0.577313944255276	200081070.738978	115509592.119138	1.73215978922869	AAAGHTLDALVK	ICPL:13C(6) (K); ICPL:13C(6) (N-term)
		B7J794													TRUE	10369	1388.735975	694.8716255	0.142949	2	922.23969687	20.94	1	47.8	20267912.229282	12635745.3195478	0.623435960083368	20267912.229282	12635745.3195478	1.60401398704412	AAAGHTLDALVK	ICPL:13C(6) (K); ICPL:13C(6) (N-term)
		B7J794													TRUE	11460	1512.757032	756.882154	0.111092	2	1014.47062647	36.24	1	30.2	2606293.22099102	2985644.39288468	1.14555199270687	2606293.22099102	2985644.39288468	0.872941609256039	NPATGAEIMIAASR	ICPL:13C(6) (N-term)
		B7J794													TRUE	2250	1528.751951	764.8796135	-0.808627	2	230.09223711	59.54	1	17.8	326072.465336328	247633.280139227	0.75944247510689	326072.465336328	247633.280139227	1.31675542622139	NPATGAEIMIAASR	ICPL:13C(6) (N-term); Oxidation (M)
		B7J794													TRUE	1695	1944.981428	972.994352	-0.025304	2	166.27305588	104.61	1	18.7	5170351.57183734	6341702.47303184	0.815293936261488	5170351.57183734	6341702.47303184	1.2265514994328	AGDQVTLVGFGSFLVSSR	ICPL (N-term)
		B7J794													TRUE	2611	1944.981428	972.994352	0.289296	2	256.33755337	98.22	1	18	3833831.36677023	4555246.5888252	0.841629820035491	3833831.36677023	4555246.5888252	1.1881708278324	AGDQVTLVGFGSFLVSSR	ICPL (N-term)
		B7J794													TRUE	2612	1944.981428	972.994352	0.310096	2	256.40280405	88.59	1	18.3	3833831.36677023	4555246.5888252	0.841629820035491	3833831.36677023	4555246.5888252	1.1881708278324	AGDQVTLVGFGSFLVSSR	ICPL (N-term)
		B7J794													TRUE	2608	1944.981428	648.99866	0.43152	3	256.28761204	69.74	1	35.9	3833831.36677023	4555246.5888252	0.841629820035491	3833831.36677023	4555246.5888252	1.1881708278324	AGDQVTLVGFGSFLVSSR	ICPL (N-term)
		B7J794													TRUE	2616	1944.981428	648.99866	0.66042	3	256.76115392	57.71	1	10.9	3833831.36677023	4555246.5888252	0.841629820035491	3833831.36677023	4555246.5888252	1.1881708278324	AGDQVTLVGFGSFLVSSR	ICPL (N-term)
		B7J794													TRUE	1688	1944.981428	648.99866	0.71172	3	166.00778922	63.49	1	11.6	5170351.57183734	6341702.47303184	0.815293936261488	5170351.57183734	6341702.47303184	1.2265514994328	AGDQVTLVGFGSFLVSSR	ICPL (N-term)
TRUE	Fructose-bisphosphate aldolase, class II	B7JBC6	762.877	39.3258	40	18	0.62	0.04	18	1.74	0.11	264617825	2458.9		TRUE	10286	763.446073	382.2266745	0.018651	2	916.82915499	43.94	1	75.2	64719213.7263695	123888020.386406	0.522400903045432	64719213.7263695	123888020.386406	1.91423865113999	ALVSLR	ICPL (N-term)
		B7JBC6													TRUE	21444	768.407758	384.707517	0.042766	2	1895.17147948	29.41	2	35.3	18257523.6751401	22833428.5884094	1.25063119153995	18257523.6751401	22833428.5884094	0.799596241293693	QSLAK	ICPL:13C(6) (K); ICPL:13C(6) (N-term)
		B7JBC6													TRUE	10284	769.466215	385.2367455	-0.000291	2	916.72030487	33.26	1	69.5	123888020.386406	64719213.7263695	0.522400903045432	123888020.386406	64719213.7263695	1.91423865113999	ALVSLR	ICPL:13C(6) (N-term)
		B7JBC6													TRUE	19267	791.368223	396.1877495	-0.021099	2	1709.63466857	36.22	1	60.7	21286307.6844723	41000960.6218419	0.519166072248872	21286307.6844723	41000960.6218419	1.9261659292725	GELDPR	ICPL (N-term)
		B7JBC6													TRUE	19265	797.388364	399.19782	0.02256	2	1709.50540191	42.29	1	77.6	41000960.6218419	21286307.6844723	0.519166072248872	41000960.6218419	21286307.6844723	1.9261659292725	GELDPR	ICPL:13C(6) (N-term)
		B7JBC6													TRUE	6409	863.473356	863.473356	0.050244	1	584.7742165	31.09	1	107.4	77642737.0112231	133797085.963511	0.580302152712039	77642737.0112231	133797085.963511	1.72324020396358	LAATGAVR	ICPL (N-term)
		B7JBC6													TRUE	6406	863.473356	432.240316	0.054568	2	584.65134983	67.22	1	78.3	77642737.0112231	133797085.963511	0.580302152712039	77642737.0112231	133797085.963511	1.72324020396358	LAATGAVR	ICPL (N-term)
		B7JBC6													TRUE	6404	869.493497	869.493497	0.071503	1	584.56089968	30.54	1	112.2	133797085.963511	77642737.0112231	0.580302152712039	133797085.963511	77642737.0112231	1.72324020396358	LAATGAVR	ICPL:13C(6) (N-term)
		B7JBC6													TRUE	6403	869.493497	435.2503865	0.071627	2	584.53294129	45.55	1	214.6	133797085.963511	77642737.0112231	0.580302152712039	133797085.963511	77642737.0112231	1.72324020396358	LAATGAVR	ICPL:13C(6) (N-term)
		B7JBC6													TRUE	9302	1063.530271	532.2687735	0.136653	2	829.97699149	21.45	1	45	7955486.94943808	5300652.54959998	0.666288887567641	7955486.94943808	5300652.54959998	1.50085048491595	YAGEPFLR	ICPL:13C(6) (N-term)
		B7JBC6													TRUE	8583	1076.56355	359.526034	-0.069102	3	765.11505207	30.75	1	23.1	19319532.720075	44362498.1275159	0.435492443742523	19319532.720075	44362498.1275159	2.29625109314464	IKEIHAR	ICPL (K); ICPL (N-term)
		B7JBC6													TRUE	8579	1076.56355	538.785413	0.092374	2	764.89694382	34.74	1	34.9	19319532.720075	44362498.1275159	0.435492443742523	19319532.720075	44362498.1275159	2.29625109314464	IKEIHAR	ICPL (K); ICPL (N-term)
		B7JBC6													TRUE	8577	1088.603818	363.539456666667	0.08563	3	764.86908514	22.62	1	59.2	44362498.1275159	19319532.720075	0.435492443742523	44362498.1275159	19319532.720075	2.29625109314464	IKEIHAR	ICPL:13C(6) (K); ICPL:13C(6) (N-term)
		B7JBC6													TRUE	8576	1088.603818	544.805547	0.085706	2	764.85772675	38.35	1	89.4	44362498.1275159	19319532.720075	0.435492443742523	44362498.1275159	19319532.720075	2.29625109314464	IKEIHAR	ICPL:13C(6) (K); ICPL:13C(6) (N-term)
		B7JBC6													TRUE	15782	1168.581922	584.794599	0.220802	2	1383.26617467	42.98	1	55.2	19358732.5166348	31372417.3129805	0.617062189486594	19358732.5166348	31372417.3129805	1.62058219906816	AIPLDTMFR	ICPL (N-term)
		B7JBC6													TRUE	15780	1174.602064	587.80467	0.21766	2	1383.25436614	37.96	1	123.3	31372417.3129805	19358732.5166348	0.617062189486594	31372417.3129805	19358732.5166348	1.62058219906816	AIPLDTMFR	ICPL:13C(6) (N-term)
		B7JBC6													TRUE	15614	1184.576841	592.7920585	1.199083	2	1373.36334162	31.05	1	29.5	5163757.57908074	8037770.00067244	0.64243659356373	5163757.57908074	8037770.00067244	1.55657384716022	AIPLDTMFR	ICPL (N-term); Oxidation (M)
		B7JBC6													TRUE	11439	1190.596982	595.802129	0.088142	2	1013.22444302	47.09	1	38.8	3932909.71526876	3151370.5846192	0.801282209043501	3932909.71526876	3151370.5846192	1.24799975428596	AIPLDTMFR	ICPL:13C(6) (N-term); Oxidation (M)
		B7JBC6													TRUE	15610	1190.596982	595.802129	0.251742	2	1373.08919122	39.54	1	34.2	8037770.00067244	5163757.57908074	0.64243659356373	8037770.00067244	5163757.57908074	1.55657384716022	AIPLDTMFR	ICPL:13C(6) (N-term); Oxidation (M)
		B7JBC6													TRUE	10367	1290.626554	430.880368666667	0.097294	3	921.73352192	35.92	1	31.4	32400483.337574	81420228.3615367	0.397941445136994	32400483.337574	81420228.3615367	2.5129325236675	KYAGEPFLR	ICPL (K); ICPL (N-term)
		B7JBC6													TRUE	10366	1290.626554	645.816915	0.13697	2	921.63565473	56.62	1	98.8	32400483.337574	81420228.3615367	0.397941445136994	32400483.337574	81420228.3615367	2.5129325236675	KYAGEPFLR	ICPL (K); ICPL (N-term)
		B7JBC6													TRUE	7636	1295.678129	648.3427025	0.154195	2	683.7051095	55.17	1	46.1	23365860.6286123	15172641.0529537	0.649350832572126	23365860.6286123	15172641.0529537	1.53999956547207	KVNIDTDLR	ICPL:13C(6) (K); ICPL:13C(6) (N-term)
		B7JBC6													TRUE	10365	1302.666822	434.893791333333	0.110426	3	921.51710486	33.27	1	29.9	81420228.3615367	32400483.337574	0.397941445136994	81420228.3615367	32400483.337574	2.5129325236675	KYAGEPFLR	ICPL:13C(6) (K); ICPL:13C(6) (N-term)
		B7JBC6													TRUE	10361	1302.666822	651.837049	0.110702	2	921.37478807	41.3	1	54.4	81420228.3615367	32400483.337574	0.397941445136994	81420228.3615367	32400483.337574	2.5129325236675	KYAGEPFLR	ICPL:13C(6) (K); ICPL:13C(6) (N-term)
		B7JBC6													TRUE	6619	1425.606946	713.307111	0.079978	2	596.1189333	80.64	1	83.3	20475912.0812036	40222509.2918626	0.509066004127845	20475912.0812036	40222509.2918626	1.96438181275382	YEAFGSAGQASK	ICPL (K); ICPL (N-term)
		B7JBC6													TRUE	5551	1425.606946	713.307111	0.083178	2	505.8189848	96.18	1	42.6	20355515.1002573	43452217.151011	0.468457455911054	20355515.1002573	43452217.151011	2.13466556542515	YEAFGSAGQASK	ICPL (K); ICPL (N-term)
		B7JBC6													TRUE	6616	1437.647214	719.327245	0.02351	2	595.94879996	78.25	1	50.8	40222509.2918626	20475912.0812036	0.509066004127845	40222509.2918626	20475912.0812036	1.96438181275382	YEAFGSAGQASK	ICPL:13C(6) (K); ICPL:13C(6) (N-term)
		B7JBC6													TRUE	5549	1437.647214	719.327245	0.06631	2	506.00685946	78.55	1	84.2	43452217.151011	20355515.1002573	0.468457455911054	43452217.151011	20355515.1002573	2.13466556542515	YEAFGSAGQASK	ICPL:13C(6) (K); ICPL:13C(6) (N-term)
		B7JBC6													TRUE	15821	1474.754987	737.8811315	1.158937	2	1385.68470802	70.33	1	14.6	3705184.46948862	1700549.16157514	0.458964776404196	3705184.46948862	1700549.16157514	2.17881643954161	KFLTASLDAMR	ICPL:13C(6) (K); ICPL:13C(6) (N-term)
		B7JBC6													TRUE	4327	1620.728864	810.86807	0.13606	2	406.88713602	86.98	1	70.5	49409249.369335	89377070.1810925	0.552817957326458	49409249.369335	89377070.1810925	1.80891374230354	TPASYDYNATVTGR	ICPL (N-term)
		B7JBC6													TRUE	4325	1626.749006	813.878141	0.122518	2	406.77239469	88.74	1	110.5	89377070.1810925	49409249.369335	0.552817957326458	89377070.1810925	49409249.369335	1.80891374230354	TPASYDYNATVTGR	ICPL:13C(6) (N-term)
		B7JBC6													TRUE	17831	1796.896589	898.9519325	1.110335	2	1568.14287323	72.45	1	81.6	28896978.1248496	41650542.8949881	0.693795953577518	28896978.1248496	41650542.8949881	1.44134596756231	VDALAIAIGTSHGAYK	ICPL (K); ICPL (N-term)
		B7JBC6													TRUE	2576	1808.936857	904.9720665	0.075267	2	253.68985364	80.3	1	15.4	1223944.45212086	1063765.41426091	0.869128833761704	1223944.45212086	1063765.41426091	1.15057740711681	VDALAIAIGTSHGAYK	ICPL:13C(6) (K); ICPL:13C(6) (N-term)
		B7JBC6													TRUE	17830	1808.936857	904.9720665	1.000467	2	1568.13112337	78.27	1	96.5	41650542.8949881	28896978.1248496	0.693795953577518	41650542.8949881	28896978.1248496	1.44134596756231	VDALAIAIGTSHGAYK	ICPL:13C(6) (K); ICPL:13C(6) (N-term)
		B7JBC6													TRUE	15662	2946.458829	982.824460333333	0.096119	3	1376.12067441	54.69	1	46.7	11419778.7823079	5966492.67989946	0.522470075264771	11419778.7823079	5966492.67989946	1.91398521626953	QLLDHAAEHSYGIPAFNVNNLEQVR	ICPL:13C(6) (N-term)
TRUE	Transketolase	B7JBD0	751.451	29.1101	42	22	0.56	0.03	22	1.89	0.09	280091946	3247.5		TRUE	4149	873.478834	437.243055	0.04869	2	397.17314457	54.23	1	51.7							TDLANAIR
		B7JBD0													TRUE	8699	978.500287	489.7537815	0.084037	2	771.69886061	39.99	1	84.2	24058387.6347902	43304218.9614878	0.55556682955502	24058387.6347902	43304218.9614878	1.79996347298299	TDLANAIR	ICPL (N-term)
		B7JBD0													TRUE	8697	984.520429	492.7638525	0.076095	2	771.50066008	60.06	1	118	43304218.9614878	24058387.6347902	0.55556682955502	43304218.9614878	24058387.6347902	1.79996347298299	TDLANAIR	ICPL:13C(6) (N-term)
		B7JBD0													TRUE	6431	1014.555829	507.7815525	0.119495	2	585.93234182	20.48	2	67.2	21267752.5957992	7994456.4498532	0.375895685914282	21267752.5957992	7994456.4498532	2.66031252145851	RGGYVLK	ICPL:13C(6) (K); ICPL:13C(6) (N-term)
		B7JBD0													TRUE	7504	1014.555829	507.7815525	0.229895	2	676.48945138	30.33	1	28.9	8395953.30342289	4362726.13060399	0.519622486326285	8395953.30342289	4362726.13060399	1.92447406783715	RGGYVLK	ICPL:13C(6) (K); ICPL:13C(6) (N-term)
		B7JBD0													TRUE	11531	1054.55676	527.782018	0.072364	2	1018.58264301	54.28	1	46.9	14310985.1762991		100	14310985.1762991		0.01	VLPSSITK	ICPL (K); ICPL (N-term)
		B7JBD0													TRUE	11510	1054.55676	527.782018	1.049364	2	1017.90773474	31.27	1	60.5	14310985.1762991		100	14310985.1762991		0.01	VLPSSITK	ICPL (K); ICPL (N-term)
		B7JBD0													TRUE	13556	1062.59419	531.800733	1.085934	2	1194.08416096	71.75	1	63.3	32177991.6739357	54000650.8063034	0.595881553156756	32177991.6739357	54000650.8063034	1.67818586546668	TPSLLALSR	ICPL (N-term)
		B7JBD0													TRUE	19194	1067.500043	356.504865	-0.958095	3	1705.09789311	22.55	1	4.7	39444683.2790184	18114031.7830783	0.459226194185557	39444683.2790184	18114031.7830783	2.17757613276723	TPGHPEYR	ICPL:13C(6) (N-term)
		B7JBD0													TRUE	11515	1066.597028	533.802152	0.069096	2	1017.82887662	56.08	1	116.7	22715846.38625	14310985.1762991	0.630000085973532	22715846.38625	14310985.1762991	1.58730137068904	VLPSSITK	ICPL:13C(6) (K); ICPL:13C(6) (N-term)
		B7JBD0													TRUE	19191	1067.500043	534.2536595	0.124081	2	1704.93891871	52.85	1	219.5	39444683.2790184	18114031.7830783	0.459226194185557	39444683.2790184	18114031.7830783	2.17757613276723	TPGHPEYR	ICPL:13C(6) (N-term)
		B7JBD0													TRUE	20221	1067.500043	534.2536595	0.137881	2	1795.25332406	33.43	1	51.3	6167044.28443511	2866682.34301034	0.464838942416144	6167044.28443511	2866682.34301034	2.15128275355372	TPGHPEYR	ICPL:13C(6) (N-term)
		B7JBD0													TRUE	13554	1068.614332	534.810804	-0.887808	2	1193.97022817	53.45	1	20.1	54000650.8063034	32177991.6739357	0.595881553156756	54000650.8063034	32177991.6739357	1.67818586546668	TPSLLALSR	ICPL:13C(6) (N-term)
		B7JBD0													TRUE	14609	1068.614332	534.810804	0.124592	2	1284.50327277	55.82	1	40.1	7211376.80252708	4428390.78871539	0.614083955114306	7211376.80252708	4428390.78871539	1.62844183058627	TPSLLALSR	ICPL:13C(6) (N-term)
		B7JBD0													TRUE	21452	1112.548307	556.7777915	0.030617	2	1896.07502081	24.83	1	66.5	34838987.2759053	64115727.548328	0.543376619249077	34838987.2759053	64115727.548328	1.84034418223949	EAIDIGPHR	ICPL (N-term)
		B7JBD0													TRUE	21450	1118.568448	559.787862	1.044876	2	1895.91547095	51	1	83.3	64115727.548328	34838987.2759053	0.543376619249077	64115727.548328	34838987.2759053	1.84034418223949	EAIDIGPHR	ICPL:13C(6) (N-term)
		B7JBD0													TRUE	2954	1151.570447	576.2888615	0.099277	2	300.7239887	68.76	1	147.1	23692340.1461949	57051007.6148936	0.415283465388083	23692340.1461949	57051007.6148936	2.40799377616804	LAEQGHHVR	ICPL (N-term)
		B7JBD0													TRUE	2952	1157.590589	579.2989325	0.071735	2	300.7012303	75.61	1	433.1	57051007.6148936	23692340.1461949	0.415283465388083	57051007.6148936	23692340.1461949	2.40799377616804	LAEQGHHVR	ICPL:13C(6) (N-term)
		B7JBD0													TRUE	2953	1157.590589	386.535047	0.071859	3	300.71190497	32.82	1	340.8	57051007.6148936	23692340.1461949	0.415283465388083	57051007.6148936	23692340.1461949	2.40799377616804	LAEQGHHVR	ICPL:13C(6) (N-term)
		B7JBD0													TRUE	19550	1186.479948	593.743612	0.145576	2	1726.56014324	51.31	1	41	4866121.01480584	8521054.5485322	0.571070280924802	4866121.01480584	8521054.5485322	1.75109795309359	GEAAEADWK	ICPL (K); ICPL (N-term)
		B7JBD0													TRUE	19554	1198.520215	599.7637455	1.128309	2	1726.76211018	43.3	1	34	8521054.5485322	4866121.01480584	0.571070280924802	8521054.5485322	4866121.01480584	1.75109795309359	GEAAEADWK	ICPL:13C(6) (K); ICPL:13C(6) (N-term)
		B7JBD0													TRUE	4229	1231.625715	616.3164955	0.151209	2	401.7790699	22.37	1	50.4	14901497.7750167	6736594.32228518	0.452074980917656	14901497.7750167	6736594.32228518	2.21202243479638	TVIGHGSPNK	ICPL:13C(6) (K); ICPL:13C(6) (N-term)
		B7JBD0													TRUE	3466	1243.606611	622.3069435	0.190913	2	328.94728843	31.17	1	44.6	5040215.18002235	2018535.43178355	0.400485963334327	5040215.18002235	2018535.43178355	2.49696641468854	VLTMDAVEK	ICPL:13C(6) (K); ICPL:13C(6) (N-term); Oxidation (M)
		B7JBD0													TRUE	19359	1427.633848	476.549466666667	0.9952	3	1714.70484352	32.52	1	38.2	12087164.7238901	33965142.5628133	0.355869689094836	12087164.7238901	33965142.5628133	2.81001734804537	HVDGHDPEAIK	ICPL (K); ICPL (N-term)
		B7JBD0													TRUE	19360	1427.633848	714.320562	1.117476	2	1714.77331018	45.29	1	34.5	12087164.7238901	33965142.5628133	0.355869689094836	12087164.7238901	33965142.5628133	2.81001734804537	HVDGHDPEAIK	ICPL (K); ICPL (N-term)
		B7JBD0													TRUE	14537	1433.708982	717.358129	0.182542	2	1280.42305571	71.97	1	48.5	9016221.78973353	4898959.95432432	0.543349539149824	9016221.78973353	4898959.95432432	1.84043590349721	LMGNYIHYGVR	ICPL:13C(6) (N-term)
		B7JBD0													TRUE	19356	1439.674116	720.340696	0.153808	2	1714.58025151	55.02	1	144.2	33965142.5628133	12087164.7238901	0.355869689094836	33965142.5628133	12087164.7238901	2.81001734804537	HVDGHDPEAIK	ICPL:13C(6) (K); ICPL:13C(6) (N-term)
		B7JBD0													TRUE	21674	1508.693876	754.850576	1.110248	2	1909.24565441	58.17	1	21.5	8145552.37493397	4260025.56180172	0.522987928346142	8145552.37493397	4260025.56180172	1.91209002311454	AKGEAAEADWK	2 ICPL:13C(6) (K); ICPL:13C(6) (N-term)
		B7JBD0													TRUE	10413	1552.757657	776.8824665	0.130467	2	924.86470486	46.93	1	56.7	14667071.8900045	24335794.6470407	0.602695416473202	14667071.8900045	24335794.6470407	1.65921288376757	VASGQCIQALAPK	ICPL (K); ICPL (N-term)
		B7JBD0													TRUE	19610	1553.711759	777.3595175	1.154165	2	1731.3662019	80.36	1	141.6	14268013.6703818	21160306.2806494	0.674282001458057	14268013.6703818	21160306.2806494	1.48305901364357	ELYPEEAAELER	ICPL (N-term)
		B7JBD0													TRUE	19611	1559.731901	520.582151	0.210747	3	1731.15309365	37.45	1	31.3	21160306.2806494	14268013.6703818	0.674282001458057	21160306.2806494	14268013.6703818	1.48305901364357	ELYPEEAAELER	ICPL:13C(6) (N-term)
		B7JBD0													TRUE	19609	1559.731901	780.3695885	1.044823	2	1731.34909364	56.91	1	184.3	21160306.2806494	14268013.6703818	0.674282001458057	21160306.2806494	14268013.6703818	1.48305901364357	ELYPEEAAELER	ICPL:13C(6) (N-term)
		B7JBD0													TRUE	10409	1564.797925	782.9026005	0.104999	2	924.75166327	65.58	1	76.7	24335794.6470407	14667071.8900045	0.602695416473202	24335794.6470407	14667071.8900045	1.65921288376757	VASGQCIQALAPK	ICPL:13C(6) (K); ICPL:13C(6) (N-term)
		B7JBD0													TRUE	7537	1951.962034	651.325528666667	0.198514	3	678.14957618	60.84	1	63.2	17668056.3007581	28017986.6615062	0.630596927402788	17668056.3007581	28017986.6615062	1.58579903666619	QNLPALPHTDETVANAR	ICPL (N-term)
		B7JBD0													TRUE	6466	1951.962034	651.325528666667	0.200614	3	587.78111623	41.04	1	36.1	9909765.6179645	16340898.5920968	0.60643945387173	9909765.6179645	16340898.5920968	1.64896923116667	QNLPALPHTDETVANAR	ICPL (N-term)
		B7JBD0													TRUE	7539	1957.982175	979.4947255	0.200549	2	678.13102631	62.26	1	12.5	28017986.6615062	17668056.3007581	0.630596927402788	28017986.6615062	17668056.3007581	1.58579903666619	QNLPALPHTDETVANAR	ICPL:13C(6) (N-term)
		B7JBD0													TRUE	1793	2225.123701	742.379417666667	0.274747	3	172.10928094	46.67	1	33.1	10576213.6669616	10994766.2951854	0.961931648478322	10576213.6669616	10994766.2951854	1.03957490283421	LAGTPASDFDAAVAVLIADFR	ICPL (N-term)
		B7JBD0													TRUE	3184	2241.976407	747.996986333333	0.166241	3	312.77935509	62.52	1	6.2	12116847.3321218	16495473.1844115	0.734555910986075	12116847.3321218	16495473.1844115	1.36136675921318	AGSHDCHGAPLGAEEVCLTR	ICPL (N-term)
TRUE	Ribulose bisphosphate carboxylase large chain 1	B7JB30	730.507	31.5011	45	23	1.94	0.14	23	0.58	0.04	213880374	2901.8		TRUE	3349	775.34094	388.174108	0.043784	2	321.96426336	34.66	1	83.5	42507705.8152102	18770618.4089234	2.26458739340215	42507705.8152102	18770618.4089234	0.441581545014995	AEFAK	ICPL (K); ICPL (N-term)
		B7JB30													TRUE	3343	775.34094	775.34094	0.06066	1	321.67084683	24.36	2	77.6	42507705.8152102	18770618.4089234	2.26458739340215	42507705.8152102	18770618.4089234	0.441581545014995	AEFAK	ICPL (K); ICPL (N-term)
		B7JB30													TRUE	3347	787.381208	787.381208	0.048092	1	321.9460719	20.23	2	63.4	18770618.4089234	42507705.8152102	2.26458739340215	18770618.4089234	42507705.8152102	0.441581545014995	AEFAK	ICPL:13C(6) (K); ICPL:13C(6) (N-term)
		B7JB30													TRUE	9369	798.414442	798.414442	-0.007642	1	835.08918297	31.97	1	103.7	47964965.5577514	49091010.1697051	0.977062101430364	47964965.5577514	49091010.1697051	1.02347639780118	LGLSAK	ICPL (K); ICPL (N-term)
		B7JB30													TRUE	9371	798.414442	399.710859	-0.006518	2	835.20036643	25.57	1	70.1	47964965.5577514	49091010.1697051	0.977062101430364	47964965.5577514	49091010.1697051	1.02347639780118	LGLSAK	ICPL (K); ICPL (N-term)
		B7JB30													TRUE	9368	810.454709	405.7309925	-0.010785	2	834.96072483	21.73	1	98.4	49091010.1697051	47964965.5577514	0.977062101430364	49091010.1697051	47964965.5577514	1.02347639780118	LGLSAK	ICPL:13C(6) (K); ICPL:13C(6) (N-term)
		B7JB30													TRUE	19427	898.394102	449.700689	0.160422	2	1718.54107712	29.22	1	33	5902189.43812178	4344723.41678082	1.35847299630754	5902189.43812178	4344723.41678082	0.736120631560653	DSPELK	ICPL (K); ICPL (N-term)
		B7JB30													TRUE	6686	947.425764	474.21652	0.13376	2	600.38355836	41.43	1	39.1	15591735.928837	11998358.5740539	1.29948907866061	15591735.928837	11998358.5740539	0.769533208413498	GGLDFTK	ICPL (K); ICPL (N-term)
		B7JB30													TRUE	3053	1003.477796	502.242536	0.154928	2	306.05285482	54.68	1	57.2	20760663.0332696	9099983.83442429	2.28139559487283	20760663.0332696	9099983.83442429	0.43832818922215	AMHAVVDR	ICPL (N-term)
		B7JB30													TRUE	4367	1015.46655	508.236913	0.010174	2	409.2551195	36.14	1	125.7	96665390.7856708	40748198.9127534	2.37226167940925	96665390.7856708	40748198.9127534	0.42153865599221	AVYECLR	ICPL (N-term)
		B7JB30													TRUE	2918	1019.472715	510.2399955	0.345209	2	298.74816363	50.96	1	50.6	4564474.03911739	2327794.836654	1.96085753230659	4564474.03911739	2327794.836654	0.509980956558166	AMHAVVDR	ICPL (N-term); Oxidation (M)
		B7JB30													TRUE	19158	1019.472715	510.2399955	1.129009	2	1702.94509364	41.25	1	45.5	3352675.65541733	1824904.02042403	1.83717917101104	3352675.65541733	1824904.02042403	0.544312724517598	AMHAVVDR	ICPL (N-term); Oxidation (M)
		B7JB30													TRUE	8948	1047.605787	524.3065315	0.119937	2	808.90983308	47.88	1	56							TGTLLHIHR
		B7JB30													TRUE	6677	1055.515607	528.2614415	0.132917	2	599.86440849	66.43	1	51.4	66535008.3605743	27598122.395199	2.41085271700037	66535008.3605743	27598122.395199	0.414790996126972	DILTNAAK	ICPL (K); ICPL (N-term)
		B7JB30													TRUE	6679	1067.555875	534.2815755	0.139449	2	599.96487462	63.7	1	53.7	27598122.395199	66535008.3605743	2.41085271700037	27598122.395199	66535008.3605743	0.414790996126972	DILTNAAK	ICPL:13C(6) (K); ICPL:13C(6) (N-term)
		B7JB30													TRUE	11710	1070.53053	535.768903	0.084794	2	1031.34483448	46.11	1	19.4	2101413.34322554	1551501.24594263	1.35443870813575	2101413.34322554	1551501.24594263	0.738313217123279	IALETWK	ICPL (K); ICPL (N-term)
		B7JB30													TRUE	12799	1070.53053	535.768903	0.087994	2	1121.8554424	40.44	1	140.3	59130418.1169567		100	59130418.1169567		0.01	IALETWK	ICPL (K); ICPL (N-term)
		B7JB30													TRUE	13817	1070.53053	535.768903	1.078194	2	1210.87511989	45.74	1	22.6	6237151.91788874	2067452.37676258	3.01682978916084	6237151.91788874	2067452.37676258	0.331473788674753	IALETWK	ICPL (K); ICPL (N-term)
		B7JB30													TRUE	12781	1082.570798	541.789037	0.125926	2	1120.7768168	49.01	1	66.2	21414189.2333787		0.01	21414189.2333787		100	IALETWK	ICPL:13C(6) (K); ICPL:13C(6) (N-term)
		B7JB30													TRUE	20491	1083.474149	542.2407125	0.103775	2	1810.3210158	39.92	1	73.8	17412473.2583962	9832910.79970043	1.77083608435935	17412473.2583962	9832910.79970043	0.564705005072098	ESFVPEDR	ICPL (N-term)
		B7JB30													TRUE	19452	1083.474149	542.2407125	1.078375	2	1719.78086858	43.48	1	97.7	106431726.592386	59018885.59283	1.80335032631175	106431726.592386	59018885.59283	0.554523425320925	ESFVPEDR	ICPL (N-term)
		B7JB30													TRUE	3319	1109.505048	555.256162	0.049476	2	320.38593856	42.63	1	64.8	31401213.1017897	15791841.9867592	1.98844524458378	31401213.1017897	15791841.9867592	0.502905474879857	KYEAGVK	2 ICPL (K); ICPL (N-term)
		B7JB30													TRUE	12197	1152.627241	576.8172585	0.080083	2	1087.20365039	67.05	1	208	68823959.4609242	29592437.7008672	2.32572794970883	68823959.4609242	29592437.7008672	0.429972903806396	TGTLLHIHR	ICPL (N-term)
		B7JB30													TRUE	12195	1152.627241	384.880597666667	0.093607	3	1087.07180027	36.48	1	40.8	68823959.4609242	29592437.7008672	2.32572794970883	68823959.4609242	29592437.7008672	0.429972903806396	TGTLLHIHR	ICPL (N-term)
		B7JB30													TRUE	5798	1210.50514	605.756208	0.178984	2	523.48295973	60.67	1	13.7	830181.737138712		100	830181.737138712		0.01	FEFDTVDK	ICPL (K); ICPL (N-term)
		B7JB30													TRUE	7278	1219.586774	610.297025	0.06815	2	663.17968497	46.58	1	83.3	29396762.0346763	45555026.9119504	0.64530226469836	29396762.0346763	45555026.9119504	1.54966138305348	NPHHGIHFR	ICPL (N-term)
		B7JB30													TRUE	7276	1219.586774	407.200442	0.068274	3	663.15057617	30.87	1	422.2	29396762.0346763	45555026.9119504	0.64530226469836	29396762.0346763	45555026.9119504	1.54966138305348	NPHHGIHFR	ICPL (N-term)
		B7JB30													TRUE	2298	1222.588453	611.7978645	0.210271	2	233.68222912	48.89	1	20.5	852885.986354962	534916.932764544	1.59442697382395	852885.986354962	534916.932764544	0.627184572524935	VALEACVEAR	ICPL (N-term)
		B7JB30													TRUE	7277	1225.606916	613.307096	0.112408	2	663.16669297	45.58	1	14.7	45555026.9119504	29396762.0346763	0.64530226469836	45555026.9119504	29396762.0346763	1.54966138305348	NPHHGIHFR	ICPL:13C(6) (N-term)
		B7JB30													TRUE	12226	1385.743665	462.586072333333	0.096083	3	1088.83688399	39.3	1	26.7	5369699.2402241	2365966.82056307	2.26955813308751	5369699.2402241	2365966.82056307	0.440614402169818	KTGTLLHIHR	ICPL (K); ICPL (N-term)
		B7JB30													TRUE	13309	1385.743665	693.3754705	0.145859	2	1178.95729429	69.52	1	38.9	8193706.63913251	4415717.77869747	1.85557751871304	8193706.63913251	4415717.77869747	0.53891577684858	KTGTLLHIHR	ICPL (K); ICPL (N-term)
		B7JB30													TRUE	13307	1385.743665	462.586072333333	0.145883	3	1178.92485269	41.83	1	61.9	8193706.63913251	4415717.77869747	1.85557751871304	8193706.63913251	4415717.77869747	0.53891577684858	KTGTLLHIHR	ICPL (K); ICPL (N-term)
		B7JB30													TRUE	13311	1397.783933	699.3956045	0.102791	2	1179.04346977	64.39	1	23.9	4415717.77869747	8193706.63913251	1.85557751871304	4415717.77869747	8193706.63913251	0.53891577684858	KTGTLLHIHR	ICPL:13C(6) (K); ICPL:13C(6) (N-term)
		B7JB30													TRUE	6673	1474.696088	737.851682	0.193836	2	599.6789669	52.74	1	21.1	9557414.94151746	5632517.82357248	1.69682817540657	9557414.94151746	5632517.82357248	0.589334862830407	EGKDILTNAAK	2 ICPL (K); ICPL (N-term)
		B7JB30													TRUE	3079	1569.722684	785.36498	0.06224	2	307.37676363	94.39	1	49.9	40056273.6591683	16454032.3204752	2.43443509037738	40056273.6591683	16454032.3204752	0.410772915635628	TCNGPPHGIQVER	ICPL (N-term)
		B7JB30													TRUE	3078	1569.722684	523.912412	0.062364	3	307.38798017	45.08	1	23.5	40056273.6591683	16454032.3204752	2.43443509037738	40056273.6591683	16454032.3204752	0.410772915635628	TCNGPPHGIQVER	ICPL (N-term)
		B7JB30													TRUE	10224	1687.818723	844.4129995	0.142801	2	913.16564673	49.92	1	17.4	5938646.76275831	2274792.28422529	2.61063254167876	5938646.76275831	2274792.28422529	0.383048929343749	LSGGDHLHTGTVVGK	ICPL (K); ICPL (N-term)
		B7JB30													TRUE	9171	1687.818723	844.4129995	0.158201	2	822.57156696	59.99	1	65.5	22405754.3023158	10342781.4234412	2.16631807103016	22405754.3023158	10342781.4234412	0.461612730546287	LSGGDHLHTGTVVGK	ICPL (K); ICPL (N-term)
		B7JB30													TRUE	10223	1687.818723	563.277758333333	0.163025	3	913.2144798	29.08	1	22.5	5938646.76275831	2274792.28422529	2.61063254167876	5938646.76275831	2274792.28422529	0.383048929343749	LSGGDHLHTGTVVGK	ICPL (K); ICPL (N-term)
		B7JB30													TRUE	20244	2283.170286	761.728279333333	0.498662	3	1796.42094858	49.7	1	21.3							FPLAYVKTCNGPPHGIQVER
TRUE	Ribulose bisphosphate carboxylase, large subunit 2	B7J5E3	690.083	30.0654	34	19	0.35	0.02	19	3.1	0.2	125610584	2397.1		TRUE	11411	896.441328	448.724302	0.053996	2	1011.47340141	24.59	1	43.9	7008274.87100172	25069293.3523067	0.279556139557354	7008274.87100172	25069293.3523067	3.57709904559201	LYPGWR	ICPL (N-term)
		B7J5E3													TRUE	14555	1006.583234	503.795255	0.08049	2	1281.78566425	26.37	1	40.2	11813050.7942347	41482814.0653868	0.284769754906563	11813050.7942347	41482814.0653868	3.51160887970042	ILGRPIK	ICPL (K); ICPL (N-term)
		B7J5E3													TRUE	12602	1009.473752	505.240514	0.102172	2	1109.44519173	50.76	1	40.5	9939342.70819786	38784893.3390504	0.25626840381666	9939342.70819786	38784893.3390504	3.90215877223562	DISDLWR	ICPL (N-term)
		B7J5E3													TRUE	12596	1015.493894	508.250585	0.08343	2	1109.18337572	49.6	1	154.3	38784893.3390504	9939342.70819786	0.25626840381666	38784893.3390504	9939342.70819786	3.90215877223562	DISDLWR	ICPL:13C(6) (N-term)
		B7J5E3													TRUE	14553	1018.623502	509.815389	0.171022	2	1281.37654743	35.26	1	122	41482814.0653868	11813050.7942347	0.284769754906563	41482814.0653868	11813050.7942347	3.51160887970042	ILGRPIK	ICPL:13C(6) (K); ICPL:13C(6) (N-term)
		B7J5E3													TRUE	12453	1053.551603	527.2794395	0.091721	2	1101.25585893	24.31	1	33.4	8292045.925479	16797620.831352	0.493644070712817	8292045.925479	16797620.831352	2.02575106099423	HILVAYK	ICPL (K); ICPL (N-term)
		B7J5E3													TRUE	12435	1065.591871	533.2995735	0.087653	2	1100.6574504	37.98	1	36.8	16797620.831352	8292045.925479	0.493644070712817	16797620.831352	8292045.925479	2.02575106099423	HILVAYK	ICPL:13C(6) (K); ICPL:13C(6) (N-term)
		B7J5E3													TRUE	21541	1167.542875	584.2750755	0.171449	2	1901.02747947	27.84	1	98.7	37495863.1062269	115017138.178138	0.326002400165386	37495863.1062269	115017138.178138	3.0674620784776	AGADPIEYAR	ICPL (N-term)
		B7J5E3													TRUE	19591	1169.551191	585.2792335	0.106333	2	1729.61226857	66.33	1	40	1909768.27945365	773713.937944131	0.405134982221757	1909768.27945365	773713.937944131	2.46831313977383	EEDLISGGK	ICPL:13C(6) (K); ICPL:13C(6) (N-term)
		B7J5E3													TRUE	20638	1169.551191	585.2792335	0.155133	2	1819.82548245	55.9	1	32.2	2945934.30149778	1508055.13370892	0.511910646799623	2945934.30149778	1508055.13370892	1.95346591490493	EEDLISGGK	ICPL:13C(6) (K); ICPL:13C(6) (N-term)
		B7J5E3													TRUE	21538	1173.563016	587.285146	0.175508	2	1900.61402934	47.44	1	201.2	115017138.178138	37495863.1062269	0.326002400165386	115017138.178138	37495863.1062269	3.0674620784776	AGADPIEYAR	ICPL:13C(6) (N-term)
		B7J5E3													TRUE	18269	1189.486875	595.2470755	-0.809551	2	1617.70495817	28.17	1	32.3	5008544.23216017	1384411.02234238	0.276409862461229	5008544.23216017	1384411.02234238	3.61781591689864	AMDETGEAK	ICPL:13C(6) (K); ICPL:13C(6) (N-term); Oxidation (M)
		B7J5E3													TRUE	13787	1191.623578	596.315427	0.152746	2	1208.66892789	45.11	1	26.4	3857574.95896001	2112048.00139674	0.547506665163065	3857574.95896001	2112048.00139674	1.82646178325915	GYTAFVLAK	ICPL:13C(6) (K); ICPL:13C(6) (N-term)
		B7J5E3													TRUE	3434	1206.507551	603.7574135	0.114573	2	327.04090497	28.61	1	43.6	23806341.2071711	9599480.06121706	0.403232062318146	23806341.2071711	9599480.06121706	2.47996152451541	QAYECWK	ICPL:13C(6) (K); ICPL:13C(6) (N-term)
		B7J5E3													TRUE	11647	1269.626234	635.316755	0.13169	2	1026.83902648	63.32	1	64.2	12353630.2030529	40648180.8519742	0.303915942709475	12353630.2030529	40648180.8519742	3.29038348921346	AIQLFDGPAK	ICPL (K); ICPL (N-term)
		B7J5E3													TRUE	12721	1281.666501	641.3368885	0.147623	2	1117.05077573	74.98	1	50.6	5517467.23017928	2156357.40300713	0.390823780739893	5517467.23017928	2156357.40300713	2.55869793313712	AIQLFDGPAK	ICPL:13C(6) (K); ICPL:13C(6) (N-term)
		B7J5E3													TRUE	11658	1281.666501	641.3368885	0.150223	2	1027.76680995	82.37	1	113.8	40648180.8519742		0.01	40648180.8519742		100	AIQLFDGPAK	ICPL:13C(6) (K); ICPL:13C(6) (N-term)
		B7J5E3													TRUE	11643	1281.666501	641.3368885	0.157223	2	1026.54130968	88.38	1	90.7	40648180.8519742	12353630.2030529	0.303915942709475	40648180.8519742	12353630.2030529	3.29038348921346	AIQLFDGPAK	ICPL:13C(6) (K); ICPL:13C(6) (N-term)
		B7J5E3													TRUE	13869	1372.700834	686.854055	1.12869	2	1214.31471137	66.46	1	42.8	19288916.4031212	9019131.30123651	0.467581024913202	19288916.4031212	9019131.30123651	2.13866676943452	TIPLVYDAMK	ICPL:13C(6) (K); ICPL:13C(6) (N-term)
		B7J5E3													TRUE	13737	1388.695753	694.8515145	0.184371	2	1205.41841162	24.34	1	48.8	6405175.413715	1323327.40198438	0.206602835443167	6405175.413715	1323327.40198438	4.84020462669344	TIPLVYDAMK	ICPL:13C(6) (K); ICPL:13C(6) (N-term); Oxidation (M)
		B7J5E3													TRUE	3523	1393.569517	697.2883965	0.120007	2	333.1555631	79.59	1	147.7	17440098.2021138	58094540.7947815	0.30020201491429	17440098.2021138	58094540.7947815	3.33109023363986	AFESFPGDADK	ICPL (K); ICPL (N-term)
		B7J5E3													TRUE	4600	1393.569517	697.2883965	0.154207	2	423.78306136	45.4	1	18	2676943.14550168	9473570.78177142	0.282569604129894	2676943.14550168	9473570.78177142	3.53895105979025	AFESFPGDADK	ICPL (K); ICPL (N-term)
		B7J5E3													TRUE	6290	1394.656019	697.8316475	0.051105	2	578.6055669	50.53	1	36.7	8578731.91054461	2107712.07783771	0.245690400378056	8578731.91054461	2107712.07783771	4.07016309331277	AGHGMITSPSAK	ICPL:13C(6) (K); ICPL:13C(6) (N-term); Oxidation (M)
		B7J5E3													TRUE	3521	1405.609785	703.3085305	0.088939	2	333.07773856	70.04	1	418.6	58094540.7947815	17440098.2021138	0.30020201491429	58094540.7947815	17440098.2021138	3.33109023363986	AFESFPGDADK	ICPL:13C(6) (K); ICPL:13C(6) (N-term)
		B7J5E3													TRUE	4604	1405.609785	703.3085305	0.142739	2	424.03193603	51	1	57.2	9473570.78177142	2676943.14550168	0.282569604129894	9473570.78177142	2676943.14550168	3.53895105979025	AFESFPGDADK	ICPL:13C(6) (K); ICPL:13C(6) (N-term)
		B7J5E3													TRUE	7447	1546.728132	773.867704	0.166392	2	673.30871805	83.3	1	50.8	20891893.0065135	7279652.59222247	0.348443895914691	20891893.0065135	7279652.59222247	2.86990247705423	QYAGQYLHYHR	ICPL:13C(6) (N-term)
		B7J5E3													TRUE	12634	1647.816556	824.411916	0.083768	2	1111.26258372	49.85	1	24.1	9165195.46857623	34990330.6770164	0.261935091530771	9165195.46857623	34990330.6770164	3.81773970855113	DGGYIAGTIIKPK	2 ICPL (K); ICPL (N-term)
		B7J5E3													TRUE	12619	1665.876951	833.4421135	-0.905827	2	1110.55165893	61.66	1	51.2	34990330.6770164	9165195.46857623	0.261935091530771	34990330.6770164	9165195.46857623	3.81773970855113	DGGYIAGTIIKPK	2 ICPL:13C(6) (K); ICPL:13C(6) (N-term)
		B7J5E3													TRUE	12623	1665.876951	555.963834333333	0.172397	3	1110.79862533	60.67	1	47.9	34990330.6770164	9165195.46857623	0.261935091530771	34990330.6770164	9165195.46857623	3.81773970855113	DGGYIAGTIIKPK	2 ICPL:13C(6) (K); ICPL:13C(6) (N-term)
TRUE	DNA-directed RNA polymerase subunit beta	B7J460	684.807	21.2922	47	29	0.7	0.03	29	1.52	0.08	173428899	1770		TRUE	21377	672.32945	672.32945	0.12035	1	1891.74062935	23.13	2	19.9	4492036.27706222	3434467.21705047	0.764568005514105	4492036.27706222	3434467.21705047	1.30792812776358	DGIEK	ICPL:13C(6) (K)
		B7J460													TRUE	20550	693.393003	693.393003	0.033297	1	1813.976099	20.52	2	61.8	10157929.1827911	12958920.5598964	0.783856119484718	10157929.1827911	12958920.5598964	1.27574433004027	VKDVK	ICPL (K)
		B7J460													TRUE	9255	766.424604	383.71594	0.03472	2	827.18620857	29.81	1	41.1	11331438.8678142	26785538.4106529	0.423043162100768	11331438.8678142	26785538.4106529	2.36382499372913	IIPYR	ICPL (N-term)
		B7J460													TRUE	9254	772.444745	386.7260105	-0.000421	2	827.07492537	21.8	1	76.3	26785538.4106529	11331438.8678142	0.423043162100768	26785538.4106529	11331438.8678142	2.36382499372913	IIPYR	ICPL:13C(6) (N-term)
		B7J460													TRUE	14632	838.456968	419.732122	0.033956	2	1285.48291438	24.11	1	37.5	10470579.2384058	14095625.6774445	0.742824722932347	10470579.2384058	14095625.6774445	1.34621259784197	LLFNAR	ICPL (N-term)
		B7J460													TRUE	14631	844.477109	422.7421925	0.034215	2	1285.45802264	23.77	1	55	14095625.6774445	10470579.2384058	0.742824722932347	14095625.6774445	10470579.2384058	1.34621259784197	LLFNAR	ICPL:13C(6) (N-term)
		B7J460													TRUE	4471	906.467939	453.7376075	0.043185	2	415.7860283	37.99	1	64.1	10971772.8591443	17359310.849222	0.632039656092459	10971772.8591443	17359310.849222	1.58217920404304	LIDGDLR	ICPL (N-term)
		B7J460													TRUE	4472	906.467939	453.7376075	0.048385	2	415.65851149	40.12	1	23.4	10971772.8591443	17359310.849222	0.632039656092459	10971772.8591443	17359310.849222	1.58217920404304	LIDGDLR	ICPL (N-term)
		B7J460													TRUE	10632	928.46356	464.735418	0.126164	2	939.3973134	30.37	1	7.4	2000709.94615209	1164574.7650967	0.582080759550625	2000709.94615209	1164574.7650967	1.71797466862161	LAVMEK	ICPL:13C(6) (K); ICPL:13C(6) (N-term); Oxidation (M)
		B7J460													TRUE	18301	978.463895	489.7355855	1.083829	2	1619.55248349	50.28	1	23.6	3470352.14012239	6163512.38328591	0.563047808508217	3470352.14012239	6163512.38328591	1.77604811685437	AQLEEQR	ICPL (N-term)
		B7J460													TRUE	18296	984.484037	492.7456565	0.086887	2	1619.44243336	40.56	1	95.2	6163512.38328591	3470352.14012239	0.563047808508217	6163512.38328591	3470352.14012239	1.77604811685437	AQLEEQR	ICPL:13C(6) (N-term)
		B7J460													TRUE	7584	985.473752	493.240514	0.084772	2	680.58249297	58.27	1	21.9	6180904.81158241	9796644.51793893	0.630920597380498	6180904.81158241	9796644.51793893	1.58498550237839	YDLSAVGR	ICPL (N-term)
		B7J460													TRUE	11420	993.551603	497.2794395	0.090721	2	1011.99804302	40.54	1	21.5	4260445.34049417	7363936.50002039	0.57855541536546	4260445.34049417	7363936.50002039	1.7284429000951	YVLIPQR	ICPL (N-term)
		B7J460													TRUE	11415	993.551603	497.2794395	0.106321	2	1011.8165598	33.9	1	58	4260445.34049417	7363936.50002039	0.57855541536546	4260445.34049417	7363936.50002039	1.7284429000951	YVLIPQR	ICPL (N-term)
		B7J460													TRUE	3310	1019.515607	510.2614415	0.071717	2	319.26569696	42.35	1	60.3	14847488.8588232	19563256.6712411	0.758947710411102	14847488.8588232	19563256.6712411	1.31761383067923	LGPEEITR	ICPL (N-term)
		B7J460													TRUE	3311	1019.515607	510.2614415	0.118317	2	319.37583029	43.8	1	46.5	14847488.8588232	19563256.6712411	0.758947710411102	14847488.8588232	19563256.6712411	1.31761383067923	LGPEEITR	ICPL (N-term)
		B7J460													TRUE	19317	1034.463315	517.7352955	0.133009	2	1712.26695178	47.7	1	32.4	4153065.31119862		0.01	4153065.31119862		100	DLNDQYR	ICPL:13C(6) (N-term)
		B7J460													TRUE	11222	1056.594877	528.8010765	0.092447	2	1000.85255982	61.33	1	78.4	8510118.72686665	11497031.2168837	0.74020141081024	8510118.72686665	11497031.2168837	1.35098364498573	VIVSQLHR	ICPL (N-term)
		B7J460													TRUE	11221	1056.594877	528.8010765	0.092447	2	1000.84033475	52.44	1	111.1	8510118.72686665	11497031.2168837	0.74020141081024	8510118.72686665	11497031.2168837	1.35098364498573	VIVSQLHR	ICPL (N-term)
		B7J460													TRUE	10421	1126.552732	563.780004	0.181992	2	925.34325472	56.18	1	5.3	4552624.75696117	5685073.32525188	0.800803172887741	4552624.75696117	5685073.32525188	1.24874630103418	ETGLEAVFR	ICPL (N-term)
		B7J460													TRUE	10422	1126.552732	563.780004	0.195192	2	925.41872138	51.24	1	32.4	4552624.75696117	5685073.32525188	0.800803172887741	4552624.75696117	5685073.32525188	1.24874630103418	ETGLEAVFR	ICPL (N-term)
		B7J460													TRUE	6871	1126.541486	563.774381	0.232838	2	615.37729169	61.44	1	9.1	1399586.19420693	1875703.7177255	0.746165922144722	1399586.19420693	1875703.7177255	1.3401844955954	LDAVLEEK	ICPL (K); ICPL (N-term)
		B7J460													TRUE	11349	1132.610929	566.8091025	0.107395	2	1007.92919287	53.09	1	28.1	3450832.10456789	5870660.17121041	0.587809889165566	3450832.10456789	5870660.17121041	1.7012303100575	VSALGPGGLTR	ICPL (N-term)
		B7J460													TRUE	11343	1132.610929	566.8091025	0.144395	2	1007.72811822	73.45	1	54.4	3450832.10456789	5870660.17121041	0.587809889165566	3450832.10456789	5870660.17121041	1.7012303100575	VSALGPGGLTR	ICPL (N-term)
		B7J460													TRUE	20202	1192.558973	596.7831245	0.136951	2	1794.29279927	28.97	1	91.1	9309719.45405699	4271672.65015819	0.458840104821491	9309719.45405699	4271672.65015819	2.17940844641085	DVHPTHYGR	ICPL:13C(6) (N-term)
		B7J460													TRUE	9160	1198.604246	599.805761	0.159278	2	821.87280002	31.81	1	31	3226340.06624617	1428318.40739635	0.442705473715978	3226340.06624617	1428318.40739635	2.25883812008514	LHHLVDDK	ICPL:13C(6) (K); ICPL:13C(6) (N-term)
		B7J460													TRUE	10211	1198.604246	599.805761	0.160478	2	912.36542167	30.43	1	15.9	5595796.01161715	2579147.39386609	0.460908043915764	5595796.01161715	2579147.39386609	2.16963017504368	LHHLVDDK	ICPL:13C(6) (K); ICPL:13C(6) (N-term)
		B7J460													TRUE	3193	1200.564374	600.785825	0.14835	2	313.2912383	62.59	1	4.4	13704450.2519722	17860854.8991904	0.767289714256252	13704450.2519722	17860854.8991904	1.30328868147192	SGQVTLYDGR	ICPL (N-term)
		B7J460													TRUE	14768	1201.599988	601.303632	0.181136	2	1293.57022263	66.96	1	54.1	7095416.58752945	8469434.62255371	0.83776744301617	7095416.58752945	8469434.62255371	1.19364867701203	AFLAEIYNR	ICPL (N-term)
		B7J460													TRUE	14766	1207.62013	604.313703	0.164194	2	1293.44005571	58.98	1	51.5	8469434.62255371	7095416.58752945	0.83776744301617	8469434.62255371	7095416.58752945	1.19364867701203	AFLAEIYNR	ICPL:13C(6) (N-term)
		B7J460													TRUE	19433	1249.579069	625.2931725	0.135055	2	1718.74159392	41.25	1	34.7	4604405.65107587	3084671.06303937	0.669939031613908	4604405.65107587	3084671.06303937	1.49267314309328	IVEEDSYQR	ICPL:13C(6) (N-term)
		B7J460													TRUE	7713	1259.637845	630.3225605	0.147279	2	687.60057617	49.32	1	4.3	6523017.8686101	5575086.57474574	1.17002987866742	6523017.8686101	5575086.57474574	0.854679028486804	DIPNVAEGALR	ICPL (N-term)
		B7J460													TRUE	7611	1287.584867	644.2960715	0.203057	2	682.19714312	45.42	1	6.8	12614645.5121288	16897620.2936963	1.33952399038479	12614645.5121288	16897620.2936963	0.746533848723936	SPGVFFDHDR	ICPL:13C(6) (N-term)
		B7J460													TRUE	2357	1338.747159	669.8772175	0.289165	2	238.01239551	50.82	1	13.2	400187.802818058	280453.878151271	0.700805662182505	400187.802818058	280453.878151271	1.42692911025536	VVAIDSGAAVVAR	ICPL:13C(6) (N-term)
		B7J460													TRUE	6648	1448.716825	724.8620505	0.041699	2	598.30314129	35.61	1	29	6982565.41909605	13058155.9351591	0.534728291940173	6982565.41909605	13058155.9351591	1.87010864222588	EFLQESVPPAAR	ICPL (N-term)
		B7J460													TRUE	19594	1538.696882	769.852079	0.043842	2	1729.78146858	69.16	1	30.1	1762100.06715073	2758593.19329855	0.638767641213428	1762100.06715073	2758593.19329855	1.56551449303281	EDLDSLTDQEIR	ICPL (N-term)
		B7J460													TRUE	19592	1544.717023	772.8621495	0.090901	2	1729.68866004	59.2	1	42.9	2758593.19329855	1762100.06715073	0.638767641213428	2758593.19329855	1762100.06715073	1.56551449303281	EDLDSLTDQEIR	ICPL:13C(6) (N-term)
		B7J460													TRUE	9337	1552.706663	776.8569695	0.146261	2	832.15930882	34.19	1	44.4	4642925.5690587	7606869.56135052	0.610359561395503	4642925.5690587	7606869.56135052	1.63837852840978	TNSYGFLETPYR	ICPL (N-term)
		B7J460													TRUE	11604	1700.810102	850.908689	0.153422	2	1023.45098488	56.6	1	33.2	3500363.85084542	4280556.59142781	0.817735679013146	3500363.85084542	4280556.59142781	1.22288904063329	LEKPVFDVVECR	ICPL (K); ICPL (N-term)
		B7J460													TRUE	11599	1712.85037	856.928823	-0.886246	2	1023.18555982	77.49	1	25.3	4280556.59142781	3500363.85084542	0.817735679013146	4280556.59142781	3500363.85084542	1.22288904063329	LEKPVFDVVECR	ICPL:13C(6) (K); ICPL:13C(6) (N-term)
		B7J460													TRUE	11601	1712.85037	571.621640666667	0.097078	3	1023.45396834	43.13	1	8.7	4280556.59142781	3500363.85084542	0.817735679013146	4280556.59142781	3500363.85084542	1.22288904063329	LEKPVFDVVECR	ICPL:13C(6) (K); ICPL:13C(6) (N-term)
		B7J460													TRUE	11518	1854.942365	927.9748205	0.017359	2	1017.99790168	74.46	1	28.7	6087896.02318085	4104812.74367117	0.674258024125461	6087896.02318085	4104812.74367117	1.48311175279974	STGPYSLVTQQPLGGK	ICPL:13C(6) (K); ICPL:13C(6) (N-term)
		B7J460													TRUE	1716	2798.362836	933.459129333333	0.014912	3	167.35892255	41.58	1	7.9	2152498.17002516	2096677.93862585	0.974067233981127	2152498.17002516	2096677.93862585	1.02662317868232	DAAQNLFQGLFFSPDRYDLSAVGR	ICPL:13C(6) (N-term)
TRUE	Conserved domain protein	B7J3Z7	645.188	56.5574	48	22	0.39	0.03	22	2.8	0.18	277266542	5967.3		TRUE	21392	732.344053	366.6756645	0.100671	2	1892.60639574	22.94	1	47.7	39368602.2153621	12221861.5259627	0.310446925677072	39368602.2153621	12221861.5259627	3.22116251536085	SLMDR	ICPL:13C(6) (N-term)
		B7J3Z7													TRUE	20473	798.378049	798.378049	0.072851	1	1809.07771553	24.63	4	52	20786537.6041719	77654035.7415662	0.267681356231759	20786537.6041719	77654035.7415662	3.735785017221	EQLAK	ICPL (K); ICPL (N-term)
		B7J3Z7													TRUE	20477	810.418317	405.7127965	-0.008593	2	1809.42199927	30.31	2	120.3	77654035.7415662	20786537.6041719	0.267681356231759	77654035.7415662	20786537.6041719	3.735785017221	EQLAK	ICPL:13C(6) (K); ICPL:13C(6) (N-term)
		B7J3Z7													TRUE	20463	810.418317	810.418317	0.053383	1	1808.65980726	29.2	2	52.2	77654035.7415662	20786537.6041719	0.267681356231759	77654035.7415662	20786537.6041719	3.735785017221	EQLAK	ICPL:13C(6) (K); ICPL:13C(6) (N-term)
		B7J3Z7													TRUE	10377	922.451597	461.7294365	0.067727	2	922.26357953	23.35	3	63.7	11781090.0686903	18390795.239604	0.640597098450646	11781090.0686903	18390795.239604	1.56104359888393	LADLEEK	ICPL (N-term)
		B7J3Z7													TRUE	19211	948.453336	474.730306	1.047388	2	1706.20746858	56.42	1	83.4	29702488.1242691	92816578.0907331	0.320012747024927	29702488.1242691	92816578.0907331	3.1248755222932	SLQENPR	ICPL (N-term)
		B7J3Z7													TRUE	19212	954.473478	954.473478	0.005822	1	1706.28256831	34.65	1	62.1	92816578.0907331	29702488.1242691	0.320012747024927	92816578.0907331	29702488.1242691	3.1248755222932	SLQENPR	ICPL:13C(6) (N-term)
		B7J3Z7													TRUE	19208	954.473478	477.740377	0.117646	2	1706.03559391	47.37	1	199.1	92816578.0907331	29702488.1242691	0.320012747024927	92816578.0907331	29702488.1242691	3.1248755222932	SLQENPR	ICPL:13C(6) (N-term)
		B7J3Z7													TRUE	3575	1027.473066	514.240171	-0.007942	2	337.53233003	51.56	1	754.9	39796782.1911663	130047571.868189	0.306017110657804	39796782.1911663	130047571.868189	3.26779113053657	LADLEEK	ICPL (K); ICPL (N-term)
		B7J3Z7													TRUE	21831	1027.473066	514.240171	0.137258	2	1921.24748747	39.67	1	71.8	3614668.09135767	13750355.6282417	0.262878153051804	3614668.09135767	13750355.6282417	3.80404376853231	LADLEEK	ICPL (K); ICPL (N-term)
		B7J3Z7													TRUE	3576	1039.513334	520.260305	-0.03661	2	337.64370496	51.36	1	2252.6	130047571.868189	39796782.1911663	0.306017110657804	130047571.868189	39796782.1911663	3.26779113053657	LADLEEK	ICPL:13C(6) (K); ICPL:13C(6) (N-term)
		B7J3Z7													TRUE	3566	1039.513334	520.260305	-0.01541	2	336.8385887	49.26	1	138.2	130047571.868189		0.01	130047571.868189		100	LADLEEK	ICPL:13C(6) (K); ICPL:13C(6) (N-term)
		B7J3Z7													TRUE	21836	1039.513334	520.260305	0.10679	2	1921.48587894	46.24	1	416.9	13750355.6282417	3614668.09135767	0.262878153051804	13750355.6282417	3614668.09135767	3.80404376853231	LADLEEK	ICPL:13C(6) (K); ICPL:13C(6) (N-term)
		B7J3Z7													TRUE	21756	1039.513334	520.260305	0.14979	2	1915.12001282	27.75	4	25.2	1626999.06116436	823108.75750144	0.505906104772047	1626999.06116436	823108.75750144	1.97665137970728	LADLEEK	ICPL:13C(6) (K); ICPL:13C(6) (N-term)
		B7J3Z7													TRUE	3624	1039.513334	520.260305	0.15799	2	341.51391349	51.37	1	39.6	1455555.10030444	572091.132612941	0.393039832358996	1455555.10030444	572091.132612941	2.5442713884699	LADLEEK	ICPL:13C(6) (K); ICPL:13C(6) (N-term)
		B7J3Z7													TRUE	3640	1039.513334	520.260305	0.16039	2	342.83431349	43.75	1	29.2	1164785.03782724	544373.066309116	0.467359253965498	1164785.03782724	544373.066309116	2.13968160791746	LADLEEK	ICPL:13C(6) (K); ICPL:13C(6) (N-term)
		B7J3Z7													TRUE	4661	1039.513334	520.260305	0.16079	2	428.33286082	42.76	1	93.8	17526895.7090037	5126255.961164	0.292479401160047	17526895.7090037	5126255.961164	3.41904419946755	LADLEEK	ICPL:13C(6) (K); ICPL:13C(6) (N-term)
		B7J3Z7													TRUE	3657	1039.513334	520.260305	0.16699	2	344.15688843	49.07	1	30.8	1042052.98035587	569562.793356403	0.546577577237862	1042052.98035587	569562.793356403	1.82956645432386	LADLEEK	ICPL:13C(6) (K); ICPL:13C(6) (N-term)
		B7J3Z7													TRUE	3694	1039.513334	520.260305	0.17039	2	346.61582176	33.89	1	26.4	844433.063434217	541266.329036224	0.640981923226636	844433.063434217	541266.329036224	1.56010639889204	LADLEEK	ICPL:13C(6) (K); ICPL:13C(6) (N-term)
		B7J3Z7													TRUE	4647	1039.513334	520.260305	0.17179	2	427.09727788	36.57	1	19.3	17526895.7090037		0.01	17526895.7090037		100	LADLEEK	ICPL:13C(6) (K); ICPL:13C(6) (N-term)
		B7J3Z7													TRUE	3709	1039.513334	520.260305	0.19579	2	348.13285537	34.12	1	26.7	880448.692334365	430200.443383254	0.488615006335746	880448.692334365	430200.443383254	2.04660108067345	LADLEEK	ICPL:13C(6) (K); ICPL:13C(6) (N-term)
		B7J3Z7													TRUE	21805	1039.513334	520.260305	1.10339	2	1918.98946295	38.36	1	9.8	640022.207905107	271678.269315953	0.424482566324063	640022.207905107	271678.269315953	2.35580935316097	LADLEEK	ICPL:13C(6) (K); ICPL:13C(6) (N-term)
		B7J3Z7													TRUE	7568	1067.563215	534.2852455	0.109709	2	679.9490263	25.53	1	21.2	17933743.1534317	75638922.3683241	0.237096756430549	17933743.1534317	75638922.3683241	4.2176873908139	LREQLAK	ICPL (K); ICPL (N-term)
		B7J3Z7													TRUE	7564	1079.603483	540.3053795	0.103241	2	679.73415964	29.26	1	53.7	75638922.3683241	17933743.1534317	0.237096756430549	75638922.3683241	17933743.1534317	4.2176873908139	LREQLAK	ICPL:13C(6) (K); ICPL:13C(6) (N-term)
		B7J3Z7													TRUE	11502	1467.704877	734.3560765	0.138647	2	1016.97210968	62.9	1	46.6	12247347.0527975	38740405.302006	0.316138846698214	12247347.0527975	38740405.302006	3.16316710345502	GDALMQELKPR	ICPL (K); ICPL (N-term)
		B7J3Z7													TRUE	11503	1467.704877	489.906476333333	0.164171	3	1017.09447661	33.46	1	26.7	12247347.0527975	38740405.302006	0.316138846698214	12247347.0527975	38740405.302006	3.16316710345502	GDALMQELKPR	ICPL (K); ICPL (N-term)
		B7J3Z7													TRUE	11500	1479.745145	740.3762105	0.151779	2	1016.83905155	68.35	1	111.5	38740405.302006	12247347.0527975	0.316138846698214	38740405.302006	12247347.0527975	3.16316710345502	GDALMQELKPR	ICPL:13C(6) (K); ICPL:13C(6) (N-term)
		B7J3Z7													TRUE	11501	1479.745145	493.919899	0.151803	3	1016.85062648	53.32	1	74.3	38740405.302006	12247347.0527975	0.316138846698214	38740405.302006	12247347.0527975	3.16316710345502	GDALMQELKPR	ICPL:13C(6) (K); ICPL:13C(6) (N-term)
		B7J3Z7													TRUE	11325	1495.740064	748.37367	0.14406	2	1006.66404302	45.71	1	46	9818901.24064821	3215760.56328586	0.327507170555223	9818901.24064821	3215760.56328586	3.05336826153974	GDALMQELKPR	ICPL:13C(6) (K); ICPL:13C(6) (N-term); Oxidation (M)
		B7J3Z7													TRUE	11327	1495.740064	499.251538666667	0.156184	3	1006.76681848	61.92	1	27.3	9818901.24064821	3215760.56328586	0.327507170555223	9818901.24064821	3215760.56328586	3.05336826153974	GDALMQELKPR	ICPL:13C(6) (K); ICPL:13C(6) (N-term); Oxidation (M)
		B7J3Z7													TRUE	11330	1495.740064	748.37367	0.16906	2	1006.96125154	42.44	1	26.4	9818901.24064821	3215760.56328586	0.327507170555223	9818901.24064821	3215760.56328586	3.05336826153974	GDALMQELKPR	ICPL:13C(6) (K); ICPL:13C(6) (N-term); Oxidation (M)
		B7J3Z7													TRUE	6573	1495.740064	748.37367	0.19186	2	592.9852085	48.87	1	42.7	28358197.2131131	7181427.33219124	0.253239910782145	28358197.2131131	7181427.33219124	3.94882464186409	GDALMQELKPR	ICPL:13C(6) (K); ICPL:13C(6) (N-term); Oxidation (M)
		B7J3Z7													TRUE	8633	1635.798612	818.402944	0.196312	2	767.85263502	72.52	1	64.9	126552719.216224	407900710.124244	0.310253735958628	126552719.216224	407900710.124244	3.22316827840986	VGGNDHLLGELNHR	ICPL (N-term)
		B7J3Z7													TRUE	9151	1641.818754	821.413015	0.05857	2	821.34733337	78.09	1	20.7	9583015.14805754	4260283.86607126	0.444566120396336	9583015.14805754	4260283.86607126	2.24938418408602	VGGNDHLLGELNHR	ICPL:13C(6) (N-term)
		B7J3Z7													TRUE	8631	1641.818754	821.413015	0.15637	2	767.74313527	63.71	1	84.8	407900710.124244	126552719.216224	0.310253735958628	407900710.124244	126552719.216224	3.22316827840986	VGGNDHLLGELNHR	ICPL:13C(6) (N-term)
		B7J3Z7													TRUE	8630	1641.818754	547.944435333333	0.156494	3	767.72601848	64.07	1	243.9	407900710.124244	126552719.216224	0.310253735958628	407900710.124244	126552719.216224	3.22316827840986	VGGNDHLLGELNHR	ICPL:13C(6) (N-term)
		B7J3Z7													TRUE	9149	1641.818754	547.944435333333	0.175694	3	821.38373337	54.84	1	50.6	9583015.14805754	4260283.86607126	0.444566120396336	9583015.14805754	4260283.86607126	2.24938418408602	VGGNDHLLGELNHR	ICPL:13C(6) (N-term)
		B7J3Z7													TRUE	5405	1641.818754	547.944435333333	1.124594	3	497.47363438	30.64	1	35.1	13548226.9408075	4484354.8118584	0.330992005924513	13548226.9408075	4484354.8118584	3.02122100262464	VGGNDHLLGELNHR	ICPL:13C(6) (N-term)
		B7J3Z7													TRUE	1780	2088.121961	696.712171	0.393687	3	171.16500628	39.52	1	81.3	101986058.827465	50678113.9367215	0.496912171323887	101986058.827465	50678113.9367215	2.01242806618275	LVPDWEPAQILAAVAEVR	ICPL:13C(6) (N-term)
TRUE	DNA-directed RNA polymerase	B7J461	638.58	17.9913	44	24	0.71	0.06	24	1.69	0.15	179786137	2513.5		TRUE	11729	825.450483	825.450483	0.036417	1	1032.89126808	28.28	1	8.3	3833663.10233744	5470271.2712963	0.700817731371661	3833663.10233744	5470271.2712963	1.42690453628045	LLELK	ICPL (K); ICPL (N-term)
		B7J461													TRUE	11728	825.450483	413.2288795	0.037641	2	1032.75731822	36	1	33.1	3833663.10233744	5470271.2712963	0.700817731371661	3833663.10233744	5470271.2712963	1.42690453628045	LLELK	ICPL (K); ICPL (N-term)
		B7J461													TRUE	11723	837.490751	419.2490135	0.013173	2	1032.32725153	30.8	1	27.1	5470271.2712963	3833663.10233744	0.700817731371661	5470271.2712963	3833663.10233744	1.42690453628045	LLELK	ICPL:13C(6) (K); ICPL:13C(6) (N-term)
		B7J461													TRUE	11726	837.490751	837.490751	0.039549	1	1032.60241848	28.01	1	43.9	5470271.2712963	3833663.10233744	0.700817731371661	5470271.2712963	3833663.10233744	1.42690453628045	LLELK	ICPL:13C(6) (K); ICPL:13C(6) (N-term)
		B7J461													TRUE	10319	876.530134	438.768705	0.03019	2	918.63820513	21.41	1	30.3	11726990.8656689	46477872.7747163	0.252313416375811	11726990.8656689	46477872.7747163	3.96332471877175	RLLELK	ICPL (K)
		B7J461													TRUE	10313	882.55026	882.55026	0.02544	1	918.35593793	21.15	1	116.1	46477872.7747163	11726990.8656689	0.252313416375811	46477872.7747163	11726990.8656689	3.96332471877175	RLLELK	ICPL:13C(6) (K)
		B7J461													TRUE	10314	882.55026	441.778768	0.025464	2	918.36750487	20.8	2	34.7	46477872.7747163	11726990.8656689	0.252313416375811	46477872.7747163	11726990.8656689	3.96332471877175	RLLELK	ICPL:13C(6) (K)
		B7J461													TRUE	4542	893.4727	447.239988	0.033424	2	420.09535308	21.07	1	106.2	12570281.743662	21496118.9354189	0.584769826656947	12570281.743662	21496118.9354189	1.71007455312267	GLADTALK	ICPL (K)
		B7J461													TRUE	9330	894.487073	447.7471745	0.032451	2	831.74039203	33.09	1	14.9	4057238.9569649	4096931.51271727	1.00978314468864	4057238.9569649	4096931.51271727	0.990311637959005	QNLLGK	ICPL:13C(6) (K); ICPL:13C(6) (N-term)
		B7J461													TRUE	12720	948.461393	474.7343345	0.060131	2	1117.0638088	41.96	1	48.3	8880322.07451771	12214291.0054465	0.727043597582361	8880322.07451771	12214291.0054465	1.37543333484443	YFLPAK	ICPL (K); ICPL (N-term)
		B7J461													TRUE	18380	955.455839	478.2315575	0.020485	2	1624.53811656	21.85	2	205	17406921.7459032	13142710.9979567	0.755027867063855	17406921.7459032	13142710.9979567	1.32445442562112	ATDEVAK	ICPL:13C(6) (K); ICPL:13C(6) (N-term)
		B7J461													TRUE	12718	960.501661	960.501661	0.031539	1	1116.81574212	36.25	1	45.5	12214291.0054465	8880322.07451771	0.727043597582361	12214291.0054465	8880322.07451771	1.37543333484443	YFLPAK	ICPL:13C(6) (K); ICPL:13C(6) (N-term)
		B7J461													TRUE	12715	960.501661	480.7544685	0.033063	2	1116.67063386	51.11	1	46.4	12214291.0054465	8880322.07451771	0.727043597582361	12214291.0054465	8880322.07451771	1.37543333484443	YFLPAK	ICPL:13C(6) (K); ICPL:13C(6) (N-term)
		B7J461													TRUE	5142	961.484998	481.246137	0.236326	2	483.0828184	31.95	1	22.2	3810878.03367184	4545180.64236309	0.838443690917976	3810878.03367184	4545180.64236309	1.1926859380445	LVTHSSGR	ICPL (N-term)
		B7J461													TRUE	6674	1022.534421	511.7708485	0.140703	2	599.70491676	54.79	1	13.8	5536257.33776376	4310630.92193516	0.778618235921152	5536257.33776376	4310630.92193516	1.28432645661958	IGIASPDK	ICPL:13C(6) (K); ICPL:13C(6) (N-term)
		B7J461													TRUE	10507	1039.520688	520.263982	0.022436	2	930.99158805	30.81	1	46.9	7871884.60694683	13655172.5560062	0.57647639197971	7871884.60694683	13655172.5560062	1.73467641331477	VAELFEAR	ICPL (N-term)
		B7J461													TRUE	6832	1080.568082	540.787679	0.239442	2	611.8602581	22.39	4	15.9	1716760.39138396	416895.929573187	0.242838739561732	1716760.39138396	416895.929573187	4.11795911066237	MKDLLK	2 ICPL:13C(6) (K); ICPL:13C(6) (N-term)
		B7J461													TRUE	3105	1087.516675	544.2619755	0.108849	2	308.78205536	64.56	1	35.2	13363357.4692241	16458653.9415284	0.811935017085794	13363357.4692241	16458653.9415284	1.23162565840455	TANSGYLTR	ICPL (N-term)
		B7J461													TRUE	3102	1093.536817	547.2720465	0.108507	2	308.61405537	59.88	1	20.5	16458653.9415284	13363357.4692241	0.811935017085794	16458653.9415284	13363357.4692241	1.23162565840455	TANSGYLTR	ICPL:13C(6) (N-term)
		B7J461													TRUE	9076	1127.568799	564.2880375	1.193325	2	817.28640003	24.87	1	58.2	7548354.49504297	3201397.23546609	0.424118559557378	7548354.49504297	3201397.23546609	2.35783126549243	TFHIGGAASR	ICPL:13C(6) (N-term)
		B7J461													TRUE	3334	1241.619932	621.313604	0.156392	2	321.12659723	56.98	1	54.4	16468632.87208	15988292.1061154	0.970832990831985	16468632.87208	15988292.1061154	1.03004328184503	SAAQSSIDIK	ICPL:13C(6) (K); ICPL:13C(6) (N-term)
		B7J461													TRUE	3351	1354.638608	677.822942	0.151516	2	322.08154709	74.55	1	2	14723935.7487447	20882221.6512941	0.705094313939162	14723935.7487447	20882221.6512941	1.41824998476202	GTGGVFADAAEVR	ICPL (N-term)
		B7J461													TRUE	6396	1406.681104	703.84419	0.18642	2	584.0732085	81.83	1	3.7	12535785.4341199	19100468.1922657	0.656307756853625	12535785.4341199	19100468.1922657	1.52367542445949	AYETGNLGLHAR	ICPL (N-term)
		B7J461													TRUE	6398	1406.681104	703.84419	0.18742	2	584.2035413	43.6	1	52.7	12535785.4341199	19100468.1922657	0.656307756853625	12535785.4341199	19100468.1922657	1.52367542445949	AYETGNLGLHAR	ICPL (N-term)
		B7J461													TRUE	193	1415.649305	708.3282905	0.136619	2	35.57847467	50.57	1	38.7	368470.975088998	183015.255483216	0.49668839028369	368470.975088998	183015.255483216	2.01333475789285	NGEVTVTDEQGR	ICPL:13C(6) (N-term)
		B7J461													TRUE	18294	1415.649305	708.3282905	0.138819	2	1619.31026697	45.23	1	72.5	5956451.18987189	2507197.90845036	0.420921422593623	5956451.18987189	2507197.90845036	2.3757403313859	NGEVTVTDEQGR	ICPL:13C(6) (N-term)
		B7J461													TRUE	10473	1419.653898	710.330587	0.159426	2	928.07002166	33.46	1	32.3	4740656.08489558	7101182.55498012	0.667586848837018	4740656.08489558	7101182.55498012	1.49793244390909	FATSDLNDLYR	ICPL (N-term)
		B7J461													TRUE	14722	1448.72978	724.868528	0.164144	2	1290.23193945	57.65	1	52.5	10426343.7752394	7604421.10045166	0.729346860642626	10426343.7752394	7604421.10045166	1.3710897433889	VIGELINTCYR	ICPL:13C(6) (N-term)
		B7J461													TRUE	10435	1472.774351	736.8908135	0.125173	2	926.47741312	41.19	1	31.8	3810607.98936908	4728569.38827406	0.805869106799754	3810607.98936908	4728569.38827406	1.24089630879532	GEPVLSLETAVPR	ICPL (N-term)
		B7J461													TRUE	10455	1472.774351	736.8908135	0.175573	2	927.10559659	57.49	1	22.4	3810607.98936908	4728569.38827406	0.805869106799754	3810607.98936908	4728569.38827406	1.24089630879532	GEPVLSLETAVPR	ICPL (N-term)
		B7J461													TRUE	9449	1501.800886	751.404081	0.152238	2	840.08290028	59.21	1	12.4	2486442.04239577	1355340.83691656	1.8345511141334	2486442.04239577	1355340.83691656	0.545092471011568	GIPLTQEIEQIR	ICPL (N-term)
		B7J461													TRUE	327	1597.687711	799.3474935	0.139613	2	45.559816	52.15	1	10.1	191164.859865269	456256.364840961	0.418985628686854	191164.859865269	456256.364840961	2.38671670704818	QNDQQEEFDAIR	ICPL (N-term)
		B7J461													TRUE	18444	1597.687711	799.3474935	1.106013	2	1629.46782482	86.72	1	88.6	8135630.93502368	11772969.9442527	0.691043209449057	8135630.93502368	11772969.9442527	1.44708751395917	QNDQQEEFDAIR	ICPL (N-term)
		B7J461													TRUE	18443	1603.707853	802.3575645	0.096071	2	1629.31952457	70.85	1	102.1	11772969.9442527	8135630.93502368	0.691043209449057	11772969.9442527	8135630.93502368	1.44708751395917	QNDQQEEFDAIR	ICPL:13C(6) (N-term)
		B7J461													TRUE	1641	1909.955503	955.4813895	0.913821	2	162.81043081	76.43	1	24.7	15112012.3897813	17820015.2273835	0.848035885320631	15112012.3897813	17820015.2273835	1.17919538230615	EGLNVLQYFISTHGAR	ICPL (N-term)
		B7J461													TRUE	1640	1915.975645	958.4914605	0.033079	2	162.86679774	63.25	1	29.1	17820015.2273835	15112012.3897813	0.848035885320631	17820015.2273835	15112012.3897813	1.17919538230615	EGLNVLQYFISTHGAR	ICPL:13C(6) (N-term)
		B7J461													TRUE	17921	2369.199689	790.404747	0.371859	3	1573.98523963	21.79	1	96.6	39055195.3194385		0.01	39055195.3194385		100	GLMAKPDGSIIETPITANFR	ICPL:13C(6) (K); ICPL:13C(6) (N-term); Oxidation (M)
TRUE	OmpA family protein	B7J450	607.699	38.2488	33	15	0.39	0.02	15	2.64	0.14	149846789	1753		TRUE	3075	715.36514	358.186208	0.022584	2	307.18517217	36.51	1	72.7	80108937.5757942	22347245.5304084	0.278960702846231	80108937.5757942	22347245.5304084	3.58473430055566	GICVR	ICPL:13C(6) (N-term)
		B7J450													TRUE	7522	782.394376	391.700826	0.046348	2	677.35831804	23.96	1	61.5	28516690.2538208	81890504.1242255	0.348229511575138	28516690.2538208	81890504.1242255	2.87166930647758	FLNQR	ICPL (N-term)
		B7J450													TRUE	5586	869.346433	869.346433	0.095567	1	507.74476827	22.45	1	41.3	17670057.4938006	43756144.0141782	0.403830316676786	17670057.4938006	43756144.0141782	2.47628758590794	FDSYK	ICPL (K); ICPL (N-term)
		B7J450													TRUE	5578	881.386701	881.386701	0.016199	1	507.35073466	21	1	77.6	43756144.0141782	17670057.4938006	0.403830316676786	43756144.0141782	17670057.4938006	2.47628758590794	FDSYK	ICPL:13C(6) (K); ICPL:13C(6) (N-term)
		B7J450													TRUE	5576	881.386701	441.1969885	0.016223	2	507.32780133	21.63	1	114.8	43756144.0141782	17670057.4938006	0.403830316676786	43756144.0141782	17670057.4938006	2.47628758590794	FDSYK	ICPL:13C(6) (K); ICPL:13C(6) (N-term)
		B7J450													TRUE	6447	986.505384	493.75633	0.08474	2	586.81079142	45.61	1	86.9	53626494.6093064	151661312.764439	0.353593765158814	53626494.6093064	151661312.764439	2.82810416510273	LLDHDIR	ICPL (N-term)
		B7J450													TRUE	5393	986.505384	493.75633	0.10554	2	496.95940133	47.84	1	81.9	23942060.1234442	76594899.9484776	0.312580343332899	23942060.1234442	76594899.9484776	3.19917749573586	LLDHDIR	ICPL (N-term)
		B7J450													TRUE	6446	992.525526	496.766401	0.034598	2	586.70542503	43.55	1	99.9	151661312.764439	53626494.6093064	0.353593765158814	151661312.764439	53626494.6093064	2.82810416510273	LLDHDIR	ICPL:13C(6) (N-term)
		B7J450													TRUE	6452	992.525526	992.525526	0.068974	1	586.99738343	22.63	1	31.4	151661312.764439	53626494.6093064	0.353593765158814	151661312.764439	53626494.6093064	2.82810416510273	LLDHDIR	ICPL:13C(6) (N-term)
		B7J450													TRUE	5391	992.525526	496.766401	0.088598	2	496.85208505	42.19	1	175.7	76594899.9484776	23942060.1234442	0.312580343332899	76594899.9484776	23942060.1234442	3.19917749573586	LLDHDIR	ICPL:13C(6) (N-term)
		B7J450													TRUE	10127	1000.540494	500.773885	0.12423	2	907.57870486	23.29	1	42.9	8996058.29543736		0.01	8996058.29543736		100	VEINSSIK	ICPL:13C(6) (K)
		B7J450													TRUE	7749	1099.541822	550.274549	0.118702	2	689.74791804	33.99	1	23.9	5671300.0464615	17337107.1080487	0.327119167639486	5671300.0464615	17337107.1080487	3.05698992576946	VEINSSIK	ICPL (K); ICPL (N-term)
		B7J450													TRUE	7736	1111.58209	556.294683	0.216634	2	689.16688445	62.41	1	42.2	17337107.1080487	5671300.0464615	0.327119167639486	17337107.1080487	5671300.0464615	3.05698992576946	VEINSSIK	ICPL:13C(6) (K); ICPL:13C(6) (N-term)
		B7J450													TRUE	9412	1238.584028	619.795652	0.169296	2	837.3338251	53.73	1	87.5	21725429.1427568	55424023.5178034	0.391985780963342	21725429.1427568	55424023.5178034	2.55111294481756	VGTYAYNLK	ICPL (K); ICPL (N-term)
		B7J450													TRUE	10474	1238.584028	619.795652	0.199896	2	928.22546327	55.24	1	38.1	6395330.79037667	17523369.1687674	0.364960112908843	6395330.79037667	17523369.1687674	2.74002545656208	VGTYAYNLK	ICPL (K); ICPL (N-term)
		B7J450													TRUE	10469	1250.624296	625.815786	0.141428	2	927.87720513	55.61	1	32.8	17523369.1687674	6395330.79037667	0.364960112908843	17523369.1687674	6395330.79037667	2.74002545656208	VGTYAYNLK	ICPL:13C(6) (K); ICPL:13C(6) (N-term)
		B7J450													TRUE	9409	1250.624296	625.815786	0.177628	2	837.06483363	61.31	1	46.6	55424023.5178034	21725429.1427568	0.391985780963342	55424023.5178034	21725429.1427568	2.55111294481756	VGTYAYNLK	ICPL:13C(6) (K); ICPL:13C(6) (N-term)
		B7J450													TRUE	10683	1288.620817	644.8140465	0.199107	2	943.25257952	74.85	1	45.9	9404685.12738418	21256959.6286974	0.442428517137872	9404685.12738418	21256959.6286974	2.26025213399247	VLDEVASFAK	ICPL (K); ICPL (N-term)
		B7J450													TRUE	11730	1300.661085	650.8341805	0.163239	2	1033.10112622	71.06	1	24.5	2528440.22899736	1351004.52385369	0.534323298751429	2528440.22899736	1351004.52385369	1.87152610102672	VLDEVASFAK	ICPL:13C(6) (K); ICPL:13C(6) (N-term)
		B7J450													TRUE	9630	1300.661085	650.8341805	0.179439	2	852.86075843	84.64	1	26.2	10234836.8700675	5137881.883666	0.501999391772634	10234836.8700675	5137881.883666	1.99203428607523	VLDEVASFAK	ICPL:13C(6) (K); ICPL:13C(6) (N-term)
		B7J450													TRUE	10681	1300.661085	650.8341805	0.195639	2	943.16656353	67.48	1	14.3	21256959.6286974	9404685.12738418	0.442428517137872	21256959.6286974	9404685.12738418	2.26025213399247	VLDEVASFAK	ICPL:13C(6) (K); ICPL:13C(6) (N-term)
		B7J450													TRUE	12816	1300.661085	650.8341805	0.234239	2	1123.30998372	84.83	1	37.5	4611008.91326029	2542872.46864295	0.551478541134499	4611008.91326029	2542872.46864295	1.81330718316402	VLDEVASFAK	ICPL:13C(6) (K); ICPL:13C(6) (N-term)
		B7J450													TRUE	13851	1300.661085	650.8341805	1.189639	2	1213.21189429	84.23	1	22.5	4941613.26905612	2178918.83839659	0.440932691362303	4941613.26905612	2178918.83839659	2.26791984261908	VLDEVASFAK	ICPL:13C(6) (K); ICPL:13C(6) (N-term)
		B7J450													TRUE	21335	1895.872648	948.439962	0.040876	2	1889.56746293	78.56	1	43.4	85439274.2361344	27330914.2760613	0.319887013559186	85439274.2361344	27330914.2760613	3.12610377293412	GHSYDNPVATNATPQGR	ICPL:13C(6) (N-term)
		B7J450													TRUE	21331	1895.872648	632.629066666667	0.3541	3	1889.30951254	39.05	1	95.4	85439274.2361344	27330914.2760613	0.319887013559186	85439274.2361344	27330914.2760613	3.12610377293412	GHSYDNPVATNATPQGR	ICPL:13C(6) (N-term)
		B7J450													TRUE	15512	1920.940656	640.985069333333	0.381692	3	1367.17454961	54.3	1	71.6	9921773.67528967	3367259.61837671	0.33938081320711	9921773.67528967	3367259.61837671	2.94654253005676	AQSVAQYLAHHGVASDR	ICPL:13C(6) (N-term)
TRUE	Glutamine synthetase	B7J4K9	590.166	28.4501	47	18	0.69	0.03	18	1.48	0.06	228018135	3659.5		TRUE	4109	777.436567	389.2219215	0.046957	2	395.0269947	20.48	1	131.7	21170087.1801557	36125842.4638947	0.586009508326727	21170087.1801557	36125842.4638947	1.70645695298591	RIEVR	ICPL (N-term)
		B7J4K9													TRUE	4107	783.456708	392.231992	0.017616	2	395.35988643	27.59	1	111.6	36125842.4638947	21170087.1801557	0.586009508326727	36125842.4638947	21170087.1801557	1.70645695298591	RIEVR	ICPL:13C(6) (N-term)
		B7J4K9													TRUE	10408	788.372602	394.689939	0.029922	2	924.64107127	36.11	1	177.8	39745983.9993028	62895632.8189343	0.631935513133713	39745983.9993028	62895632.8189343	1.58243994714126	FVDFR	ICPL (N-term)
		B7J4K9													TRUE	10405	788.372602	394.689939	0.036922	2	924.53961313	31.3	1	181.8	39745983.9993028	62895632.8189343	0.631935513133713	39745983.9993028	62895632.8189343	1.58243994714126	FVDFR	ICPL (N-term)
		B7J4K9													TRUE	3336	833.386716	833.386716	0.062084	1	321.24589697	25.04	2	13.3	21433824.7891672	10666489.1639799	0.497647492638402	21433824.7891672	10666489.1639799	2.00945451306958	FTDTK	ICPL:13C(6) (K); ICPL:13C(6) (N-term)
		B7J4K9													TRUE	10439	1077.547574	539.277425	0.16195	2	926.31272992	65.49	1	56.1	21578277.743404	29039573.9329742	0.743064543343801	21578277.743404	29039573.9329742	1.34577811437481	WAEVQALR	ICPL (N-term)
		B7J4K9													TRUE	10438	1083.567716	542.287496	0.136608	2	926.19719659	52.26	1	52	29039573.9329742	21578277.743404	0.743064543343801	29039573.9329742	21578277.743404	1.34577811437481	WAEVQALR	ICPL:13C(6) (N-term)
		B7J4K9													TRUE	15888	1111.557096	556.282186	0.139428	2	1390.55902428	38.24	1	178.1	52097789.1356161	74321027.7632663	0.700983163224847	52097789.1356161	74321027.7632663	1.42656778716273	IPFVNSPK	ICPL (K); ICPL (N-term)
		B7J4K9													TRUE	15877	1111.557096	556.282186	1.090228	2	1389.65906588	37.74	1	224.1	52097789.1356161	74321027.7632663	0.700983163224847	52097789.1356161	74321027.7632663	1.42656778716273	IPFVNSPK	ICPL (K); ICPL (N-term)
		B7J4K9													TRUE	8725	1114.608228	557.807752	0.137496	2	773.09328514	37.97	1	60	19971437.5859186	14655295.4581753	0.73381274608436	19971437.5859186	14655295.4581753	1.36274547605778	RAEIYLK	ICPL:13C(6) (K); ICPL:13C(6) (N-term)
		B7J4K9													TRUE	15873	1123.597364	562.30232	0.14116	2	1389.57864135	31.71	1	666.6	74321027.7632663	52097789.1356161	0.700983163224847	74321027.7632663	52097789.1356161	1.42656778716273	IPFVNSPK	ICPL:13C(6) (K); ICPL:13C(6) (N-term)
		B7J4K9													TRUE	15887	1123.597364	562.30232	0.14236	2	1390.54545787	37.03	1	177.2	74321027.7632663	52097789.1356161	0.700983163224847	74321027.7632663	52097789.1356161	1.42656778716273	IPFVNSPK	ICPL:13C(6) (K); ICPL:13C(6) (N-term)
		B7J4K9													TRUE	4592	1137.597745	569.3025105	0.120379	2	423.14661123	20.75	2	25.6	2503734.11632495	2330900.28014953	0.930969572588199	2503734.11632495	2330900.28014953	1.07414896194715	ADEVQILK	ICPL:13C(6) (K); ICPL:13C(6) (N-term)
		B7J4K9													TRUE	3346	1161.521116	581.264196	0.152008	2	321.85838816	37.69	1	60	60038572.1055242	72513246.9312719	0.827966952885571	60038572.1055242	72513246.9312719	1.20777767339007	GYSPSDVVK	ICPL (K); ICPL (N-term)
		B7J4K9													TRUE	3361	1173.561384	587.28433	0.10074	2	322.55266389	24.29	2	5.1	72513246.9312719	60038572.1055242	0.827966952885571	72513246.9312719	60038572.1055242	1.20777767339007	GYSPSDVVK	ICPL:13C(6) (K); ICPL:13C(6) (N-term)
		B7J4K9													TRUE	3344	1173.561384	587.28433	0.13494	2	321.64873857	36.8	1	83.8	72513246.9312719	60038572.1055242	0.827966952885571	72513246.9312719	60038572.1055242	1.20777767339007	GYSPSDVVK	ICPL:13C(6) (K); ICPL:13C(6) (N-term)
		B7J4K9													TRUE	12692	1348.59567	674.801473	0.191054	2	1115.18984238	34.68	1	23.6	5596461.99886979	6927986.75210157	0.807804951008622	5596461.99886979	6927986.75210157	1.23792259350652	AFDGSSIAGWK	ICPL (K); ICPL (N-term)
		B7J4K9													TRUE	11619	1348.59567	674.801473	1.180454	2	1024.63252622	31.6	1	60.1	22853305.4079166	31086339.511411	0.735155884131284	22853305.4079166	31086339.511411	1.36025572478642	AFDGSSIAGWK	ICPL (K); ICPL (N-term)
		B7J4K9													TRUE	5669	1358.673902	453.562818	0.123246	3	513.36356027	54.69	1	10.1	18506138.0790896	30296007.6199184	0.610844118844313	18506138.0790896	30296007.6199184	1.63707887028846	KADEVQILK	2 ICPL (K); ICPL (N-term)
		B7J4K9													TRUE	5666	1358.673902	679.840589	0.177022	2	513.2255432	57.6	1	97	18506138.0790896	30296007.6199184	0.610844118844313	18506138.0790896	30296007.6199184	1.63707887028846	KADEVQILK	2 ICPL (K); ICPL (N-term)
		B7J4K9													TRUE	11617	1360.635938	680.821607	0.139786	2	1024.90800141	53.98	1	182.6	31086339.511411	22853305.4079166	0.735155884131284	31086339.511411	22853305.4079166	1.36025572478642	AFDGSSIAGWK	ICPL:13C(6) (K); ICPL:13C(6) (N-term)
		B7J4K9													TRUE	12684	1360.635938	680.821607	0.200386	2	1114.83407546	46.6	1	54.2	6927986.75210157	5596461.99886979	0.807804951008622	6927986.75210157	5596461.99886979	1.23792259350652	AFDGSSIAGWK	ICPL:13C(6) (K); ICPL:13C(6) (N-term)
		B7J4K9													TRUE	5662	1376.734296	688.870786	0.129828	2	512.93506852	76.49	1	43.7	30296007.6199184	18506138.0790896	0.610844118844313	30296007.6199184	18506138.0790896	1.63707887028846	KADEVQILK	2 ICPL:13C(6) (K); ICPL:13C(6) (N-term)
		B7J4K9													TRUE	5667	1376.734296	459.582949333333	0.147152	3	513.23900987	41.74	1	66.9	30296007.6199184	18506138.0790896	0.610844118844313	30296007.6199184	18506138.0790896	1.63707887028846	KADEVQILK	2 ICPL:13C(6) (K); ICPL:13C(6) (N-term)
		B7J4K9													TRUE	6727	1376.734296	688.870786	0.163028	2	603.49079942	72.9	1	27.4	6413175.51236024	3409938.54109853	0.531708283131577	6413175.51236024	3409938.54109853	1.88073052785702	KADEVQILK	2 ICPL:13C(6) (K); ICPL:13C(6) (N-term)
		B7J4K9													TRUE	21717	1486.623319	743.8152975	0.120005	2	1912.38096268	27.97	1	78.7	17732899.6330725	25291064.6124339	0.701152755125792	17732899.6330725	25291064.6124339	1.4262227349026	VDAEEAAWNSGK	ICPL (K); ICPL (N-term)
		B7J4K9													TRUE	21720	1486.623319	496.212623666667	1.146529	3	1912.26301282	29.15	1	14.8	17732899.6330725	25291064.6124339	0.701152755125792	17732899.6330725	25291064.6124339	1.4262227349026	VDAEEAAWNSGK	ICPL (K); ICPL (N-term)
		B7J4K9													TRUE	21719	1498.663587	500.226046333333	1.024061	3	1912.22013761	20.8	1	22.7	25291064.6124339	17732899.6330725	0.701152755125792	25291064.6124339	17732899.6330725	1.4262227349026	VDAEEAAWNSGK	ICPL:13C(6) (K); ICPL:13C(6) (N-term)
		B7J4K9													TRUE	21715	1498.663587	749.8354315	1.115737	2	1911.86590401	92.7	1	75.4	25291064.6124339	17732899.6330725	0.701152755125792	25291064.6124339	17732899.6330725	1.4262227349026	VDAEEAAWNSGK	ICPL:13C(6) (K); ICPL:13C(6) (N-term)
		B7J4K9													TRUE	7843	1511.702619	756.3549475	0.173505	2	695.48737618	44.89	1	53.3	13217251.4362731	7300121.35565311	0.552317657786158	13217251.4362731	7300121.35565311	1.81055228979692	ALEADHDFLMK	ICPL:13C(6) (K); ICPL:13C(6) (N-term)
		B7J4K9													TRUE	7784	1527.697538	764.352407	0.161386	2	691.84561831	26.49	1	10.9	6306981.67791038	4098119.6738445	0.649775103707338	6306981.67791038	4098119.6738445	1.53899402161521	ALEADHDFLMK	ICPL:13C(6) (K); ICPL:13C(6) (N-term); Oxidation (M)
		B7J4K9													TRUE	19311	1594.716596	797.861936	1.050728	2	1711.97287712	31.42	1	12.7							CDVIEPATGQGYER
		B7J4K9													TRUE	20514	1699.73805	850.372663	1.043274	2	1811.7413822	46.75	1	30.9	15669287.6655653	26534398.0610461	0.590527346032718	15669287.6655653	26534398.0610461	1.69340168024089	CDVIEPATGQGYER	ICPL (N-term)
		B7J4K9													TRUE	10429	1703.802335	852.4048055	0.127589	2	925.71777152	69.16	1	46.5	23648312.5935285	30979521.5957417	0.763353059550767	23648312.5935285	30979521.5957417	1.31000981457846	AINALTNPSTNSYK	ICPL (K); ICPL (N-term)
		B7J4K9													TRUE	20510	1705.758192	853.382734	0.059132	2	1811.55979073	60.76	1	29.4	26534398.0610461	15669287.6655653	0.590527346032718	26534398.0610461	15669287.6655653	1.69340168024089	CDVIEPATGQGYER	ICPL:13C(6) (N-term)
		B7J4K9													TRUE	10433	1715.842603	572.619051666667	0.086245	3	925.92553847	35.7	1	18.1	30979521.5957417	23648312.5935285	0.763353059550767	30979521.5957417	23648312.5935285	1.31000981457846	AINALTNPSTNSYK	ICPL:13C(6) (K); ICPL:13C(6) (N-term)
		B7J4K9													TRUE	10424	1715.842603	858.4249395	0.103721	2	925.58327179	53.21	1	87.9	30979521.5957417	23648312.5935285	0.763353059550767	30979521.5957417	23648312.5935285	1.31000981457846	AINALTNPSTNSYK	ICPL:13C(6) (K); ICPL:13C(6) (N-term)
		B7J4K9													TRUE	10470	1822.875883	911.9415795	0.096241	2	928.4034462	34.57	1	73.5	24492731.8589386	27121245.4169473	0.903082859300915	24492731.8589386	27121245.4169473	1.10731810453596	GGYFPVPPVDSAQDLR	ICPL (N-term)
		B7J4K9													TRUE	10471	1822.875883	911.9415795	0.102241	2	928.15212993	43.56	1	146.7	24492731.8589386	27121245.4169473	0.903082859300915	24492731.8589386	27121245.4169473	1.10731810453596	GGYFPVPPVDSAQDLR	ICPL (N-term)
		B7J4K9													TRUE	10472	1822.875883	608.296811666667	0.134965	3	928.10353846	31.03	1	4	24492731.8589386	27121245.4169473	0.903082859300915	24492731.8589386	27121245.4169473	1.10731810453596	GGYFPVPPVDSAQDLR	ICPL (N-term)
		B7J4K9													TRUE	10457	1822.875883	911.9415795	0.143441	2	927.66767979	42.57	1	9	24492731.8589386	27121245.4169473	0.903082859300915	24492731.8589386	27121245.4169473	1.10731810453596	GGYFPVPPVDSAQDLR	ICPL (N-term)
TRUE	Antioxidant, AhpC/Tsa family	B7J7G1	580.155	55	50	25	0.36	0.02	25	2.99	0.16	460734566	6191.4		TRUE	20334	678.356931	678.356931	0.066469	1	1801.95212407	25.56	1	186.1	43352758.8858322	138297568.673727	0.313474483330291	43352758.8858322	138297568.673727	3.19005231104043	EGIVR	ICPL (N-term)
		B7J7G1													TRUE	20332	684.377073	684.377073	0.060427	1	1801.88846593	25.61	1	516.9	138297568.673727	43352758.8858322	0.313474483330291	138297568.673727	43352758.8858322	3.19005231104043	EGIVR	ICPL:13C(6) (N-term)
		B7J7G1													TRUE	9388	796.435193	398.7212345	0.034931	2	835.77843309	45.52	1	35.7	63435727.5182823	209373536.688468	0.302978726545895	63435727.5182823	209373536.688468	3.30056176352871	AVLVGK	ICPL (K); ICPL (N-term)
		B7J7G1													TRUE	9385	796.435193	796.435193	0.063107	1	835.61403362	37.16	1	52.4	63435727.5182823	209373536.688468	0.302978726545895	63435727.5182823	209373536.688468	3.30056176352871	AVLVGK	ICPL (K); ICPL (N-term)
		B7J7G1													TRUE	9435	808.475461	808.475461	0.012139	1	839.03087522	22.96	1	2.4	2249426.76403997	1316715.25175776	0.585355910584499	2249426.76403997	1316715.25175776	1.70836235172113	AVLVGK	ICPL:13C(6) (K); ICPL:13C(6) (N-term)
		B7J7G1													TRUE	9381	808.475461	808.475461	0.021439	1	835.54615843	37.48	1	188.3	209373536.688468	63435727.5182823	0.302978726545895	209373536.688468	63435727.5182823	3.30056176352871	AVLVGK	ICPL:13C(6) (K); ICPL:13C(6) (N-term)
		B7J7G1													TRUE	9445	808.475461	404.7413685	0.024863	2	839.88195843	30.33	1	13.2	2249426.76403997	1072534.71654137	0.476803572219929	2249426.76403997	1072534.71654137	2.09729972312108	AVLVGK	ICPL:13C(6) (K); ICPL:13C(6) (N-term)
		B7J7G1													TRUE	9384	808.475461	404.7413685	0.026663	2	835.54525017	47.54	1	226.7	209373536.688468	63435727.5182823	0.302978726545895	209373536.688468	63435727.5182823	3.30056176352871	AVLVGK	ICPL:13C(6) (K); ICPL:13C(6) (N-term)
		B7J7G1													TRUE	10443	808.475461	808.475461	0.052339	1	926.67338007	33.85	1	36	8070386.80161124	2819436.32395435	0.349355785944665	8070386.80161124	2819436.32395435	2.862411444814	AVLVGK	ICPL:13C(6) (K); ICPL:13C(6) (N-term)
		B7J7G1													TRUE	7841	860.393705	430.7004905	0.044219	2	695.62708444	22.92	1	156.5	60649521.3328009	204398828.636148	0.296721472121367	60649521.3328009	204398828.636148	3.37016392123781	LNEFK	ICPL (K); ICPL (N-term)
		B7J7G1													TRUE	7845	872.433973	436.7206245	0.025751	2	695.77146844	22.86	1	751.8	204398828.636148	60649521.3328009	0.296721472121367	204398828.636148	60649521.3328009	3.37016392123781	LNEFK	ICPL:13C(6) (K); ICPL:13C(6) (N-term)
		B7J7G1													TRUE	9290	918.477521	459.7423985	0.091403	2	829.21552483	59.31	1	63.8	24400580.4351493	6484574.73777488	0.265754937879829	24400580.4351493	6484574.73777488	3.76286517186818	GSFLIDR	ICPL:13C(6) (N-term)
		B7J7G1													TRUE	6603	995.461454	995.461454	0.033346	1	594.7111253	31.3	1	1.5	28877505.8672647	67680755.3994931	0.426672333912528	28877505.8672647	67680755.3994931	2.3437188693022	NIDEMIR	ICPL (N-term)
		B7J7G1													TRUE	6602	995.461454	498.234365	0.06507	2	594.68791677	63.77	1	55.6	28877505.8672647	67680755.3994931	0.426672333912528	28877505.8672647	67680755.3994931	2.3437188693022	NIDEMIR	ICPL (N-term)
		B7J7G1													TRUE	6600	1001.481595	501.2444355	0.044529	2	594.46920849	46.5	1	132.7	67680755.3994931	28877505.8672647	0.426672333912528	67680755.3994931	28877505.8672647	2.3437188693022	NIDEMIR	ICPL:13C(6) (N-term)
		B7J7G1													TRUE	7664	1001.481595	501.2444355	0.132929	2	685.08480123	50.28	1	28	7628207.61050192	3859325.65548699	0.505928240622838	7628207.61050192	3859325.65548699	1.97656489538698	NIDEMIR	ICPL:13C(6) (N-term)
		B7J7G1													TRUE	20415	1011.456373	506.2318245	0.032951	2	1806.44876567	45.05	1	49.2	11702119.8421	39763974.7140778	0.294289490078493	11702119.8421	39763974.7140778	3.39801465466293	NIDEMIR	ICPL (N-term); Oxidation (M)
		B7J7G1													TRUE	6361	1011.456373	506.2318245	0.180151	2	582.2655749	53.14	1	79.3	26523993.9329781	53932769.7578353	0.491797362755039	26523993.9329781	53932769.7578353	2.03335779272589	NIDEMIR	ICPL (N-term); Oxidation (M)
		B7J7G1													TRUE	20414	1017.476514	509.241895	0.08001	2	1806.32189899	39.11	1	118.5	39763974.7140778	11702119.8421	0.294289490078493	39763974.7140778	11702119.8421	3.39801465466293	NIDEMIR	ICPL:13C(6) (N-term); Oxidation (M)
		B7J7G1													TRUE	6357	1017.476514	509.241895	0.11441	2	582.15577437	42.61	1	127.2	53932769.7578353	26523993.9329781	0.491797362755039	53932769.7578353	26523993.9329781	2.03335779272589	NIDEMIR	ICPL:13C(6) (N-term); Oxidation (M)
		B7J7G1													TRUE	11675	1115.567106	558.287191	0.105618	2	1028.97009315	23.11	2	34.7	3647071.61152068	2108692.50575372	0.578187853260848	3647071.61152068	2108692.50575372	1.72954169541997	LNEFKSR	ICPL:13C(6) (K); ICPL:13C(6) (N-term)
		B7J7G1													TRUE	14588	1244.584714	622.795995	0.15301	2	1283.33848078	32.62	1	30.6	7063625.08358034	20249318.7472054	0.348832727251884	7063625.08358034	20249318.7472054	2.86670349963444	FQFSQHIK	ICPL (K); ICPL (N-term)
		B7J7G1													TRUE	13538	1244.584714	622.795995	1.11161	2	1193.03587828	32.99	1	256.7	77017391.5924123	244454787.490587	0.315057816551774	77017391.5924123	244454787.490587	3.17402060023376	FQFSQHIK	ICPL (K); ICPL (N-term)
		B7J7G1													TRUE	5268	1248.669507	624.8383915	0.160617	2	490.15674319	58.88	1	84.6							HEVVNDLPLGR
		B7J7G1													TRUE	12462	1256.624982	628.816129	0.179142	2	1101.73546747	32.8	1	43.7	8726550.17295416	2928972.73695837	0.335639247916779	8726550.17295416	2928972.73695837	2.97938934795834	FQFSQHIK	ICPL:13C(6) (K); ICPL:13C(6) (N-term)
		B7J7G1													TRUE	13537	1256.624982	628.816129	1.029142	2	1192.96423617	32.94	1	605.1	244454787.490587	77017391.5924123	0.315057816551774	244454787.490587	77017391.5924123	3.17402060023376	FQFSQHIK	ICPL:13C(6) (K); ICPL:13C(6) (N-term)
		B7J7G1													TRUE	14584	1256.624982	628.816129	1.155342	2	1283.15787278	34.92	1	61.1	20249318.7472054	7063625.08358034	0.348832727251884	20249318.7472054	7063625.08358034	2.86670349963444	FQFSQHIK	ICPL:13C(6) (K); ICPL:13C(6) (N-term)
		B7J7G1													TRUE	8663	1353.690961	677.3491185	0.095963	2	769.75682702	70.56	1	172.9	137805698.948033	463589322.296695	0.297258138443142	137805698.948033	463589322.296695	3.36407946721793	HEVVNDLPLGR	ICPL (N-term)
		B7J7G1													TRUE	8664	1359.711103	453.908551666667	0.026545	3	769.76755181	41.39	1	8.8	463589322.296695	137805698.948033	0.297258138443142	463589322.296695	137805698.948033	3.36407946721793	HEVVNDLPLGR	ICPL:13C(6) (N-term)
		B7J7G1													TRUE	8661	1359.711103	680.3591895	0.065221	2	769.69027715	66.2	1	506.1	463589322.296695	137805698.948033	0.297258138443142	463589322.296695	137805698.948033	3.36407946721793	HEVVNDLPLGR	ICPL:13C(6) (N-term)
		B7J7G1													TRUE	9184	1359.711103	680.3591895	0.099021	2	823.24185017	71.37	1	65.9	19896843.5733272	5604346.68952093	0.28167013872662	19896843.5733272	5604346.68952093	3.55025209459838	HEVVNDLPLGR	ICPL:13C(6) (N-term)
		B7J7G1													TRUE	7912	2208.046873	736.687141666667	-0.769025	3	700.8283431	29.47	1	16.9	8037093.69190755	3053884.88724687	0.379973782105065	8037093.69190755	3053884.88724687	2.63176052426558	AAPDFVAPAVMPDNSINEK	ICPL:13C(6) (K); ICPL:13C(6) (N-term)
		B7J7G1													TRUE	13433	2249.122724	750.379092	0.129624	3	1186.94551937	43.71	1	32.4	4402214.74867439	938292.509901284	0.213141012755869	4402214.74867439	938292.509901284	4.69172960694053	GKAGMKPTSEGVADFLAHHGK	ICPL:13C(6) (K)
		B7J7G1													TRUE	14659	2286.08949	762.701347333333	1.163858	3	1286.88653091	62.52	1	116.4	39073320.5710168	9522776.25987175	0.243715561429284	39073320.5710168	9522776.25987175	4.10314382116367	AGMKPTSEGVADFLAHHGK	2 ICPL:13C(6) (K); ICPL:13C(6) (N-term)
		B7J7G1													TRUE	12479	2302.084409	768.032987	0.264339	3	1102.67095067	78.69	1	68.7	15069425.0762615	3517996.64754839	0.233452612143127	15069425.0762615	3517996.64754839	4.28352456980397	AGMKPTSEGVADFLAHHGK	2 ICPL:13C(6) (K); ICPL:13C(6) (N-term); Oxidation (M)
		B7J7G1													TRUE	1542	2425.102994	809.039182	0.243054	3	156.76509748	38	1	19.4	3967587.34005716	11299720.8536025	0.351122597758002	3967587.34005716	11299720.8536025	2.84800809285768	NTEVIACSVDSHFTHLAWK	ICPL (K); ICPL (N-term)
		B7J7G1													TRUE	626	2437.143262	813.052604666667	0.149386	3	67.01614078	43.01	1	32.5	3375845.73537205		0.01	3375845.73537205		100	NTEVIACSVDSHFTHLAWK	ICPL:13C(6) (K); ICPL:13C(6) (N-term)
		B7J7G1													TRUE	1548	2437.143262	813.052604666667	0.219586	3	156.91230601	38.13	1	37.7	11299720.8536025	3967587.34005716	0.351122597758002	11299720.8536025	3967587.34005716	2.84800809285768	NTEVIACSVDSHFTHLAWK	ICPL:13C(6) (K); ICPL:13C(6) (N-term)
		B7J7G1													TRUE	16758	2437.143262	813.052604666667	0.246586	3	1474.88495808	24.08	2	13	296254.148371377	129299.35274546	0.436447399829734	296254.148371377	129299.35274546	2.29122684747376	NTEVIACSVDSHFTHLAWK	ICPL:13C(6) (K); ICPL:13C(6) (N-term)
		B7J7G1													TRUE	2480	2437.143262	813.052604666667	0.259186	3	246.96593738	34.41	1	30.1	1915449.9500048	671023.232880824	0.350321465136243	1915449.9500048	671023.232880824	2.85452105999583	NTEVIACSVDSHFTHLAWK	ICPL:13C(6) (K); ICPL:13C(6) (N-term)
		B7J7G1													TRUE	16782	2437.143262	813.052604666667	1.181386	3	1476.42149142	24.78	1	9.3	282261.650692899		0.01	282261.650692899		100	NTEVIACSVDSHFTHLAWK	ICPL:13C(6) (K); ICPL:13C(6) (N-term)
		B7J7G1													TRUE	15740	2437.143262	813.052604666667	1.192486	3	1380.55194107	45.36	1	657.3	196159048.808547	62217275.8723346	0.317177699679097	196159048.808547	62217275.8723346	3.1528067736532	NTEVIACSVDSHFTHLAWK	ICPL:13C(6) (K); ICPL:13C(6) (N-term)
TRUE	Superoxide dismutase	B7JC00	577.099	25.3659	47	23	0.52	0.03	23	2.12	0.14	293712201	4906.6		TRUE	19228	845.378782	423.193029	0.002742	2	1707.23706058	37.62	1	280.4	68448454.112852	192294366.333377	0.355956627424978	68448454.112852	192294366.333377	2.80933103348599	SEYSVR	ICPL (N-term)
		B7JC00													TRUE	19227	845.378782	845.378782	0.032818	1	1707.24846857	25.11	1	204.9	68448454.112852	192294366.333377	0.355956627424978	68448454.112852	192294366.333377	2.80933103348599	SEYSVR	ICPL (N-term)
		B7JC00													TRUE	19223	851.398923	426.2030995	0.007801	2	1707.33235177	32.34	1	530.8	192294366.333377	68448454.112852	0.355956627424978	192294366.333377	68448454.112852	2.80933103348599	SEYSVR	ICPL:13C(6) (N-term)
		B7JC00													TRUE	19224	851.398923	851.398923	0.042077	1	1707.16714323	23.03	1	402.5	192294366.333377	68448454.112852	0.355956627424978	192294366.333377	68448454.112852	2.80933103348599	SEYSVR	ICPL:13C(6) (N-term)
		B7JC00													TRUE	20478	853.38722	427.197248	0.028704	2	1809.44567393	25.01	2	81.3	23296945.2922869	56409069.1831896	0.412999995029693	23296945.2922869	56409069.1831896	2.42130753519284	ELAEMR	ICPL (N-term)
		B7JC00													TRUE	20471	859.407361	430.2073185	0.063363	2	1809.1087326	27.54	1	124.1	56409069.1831896	23296945.2922869	0.412999995029693	56409069.1831896	23296945.2922869	2.42130753519284	ELAEMR	ICPL:13C(6) (N-term)
		B7JC00													TRUE	19440	859.407361	430.2073185	0.144363	2	1719.13931018	25.96	1	36.2	5380673.19571648	1777266.63847985	0.330305627908181	5380673.19571648	1777266.63847985	3.02749912659066	ELAEMR	ICPL:13C(6) (N-term)
		B7JC00													TRUE	18285	869.382139	435.1947075	-0.039015	2	1618.71054963	31.84	1	43.6	4075597.14468591	10994176.9700048	0.370705070129878	4075597.14468591	10994176.9700048	2.69756224172938	ELAEMR	ICPL (N-term); Oxidation (M)
		B7JC00													TRUE	20284	869.382139	435.1947075	0.035585	2	1798.66889046	34.34	1	50.2	9727331.30283329	23415029.5850847	0.415431091704858	9727331.30283329	23415029.5850847	2.40713807889576	ELAEMR	ICPL (N-term); Oxidation (M)
		B7JC00													TRUE	20278	875.40228	438.204778	0.120244	2	1798.4119822	25	1	91.6	23415029.5850847	9727331.30283329	0.415431091704858	23415029.5850847	9727331.30283329	2.40713807889576	ELAEMR	ICPL:13C(6) (N-term); Oxidation (M)
		B7JC00													TRUE	6591	889.42027	889.42027	0.05053	1	593.9560165	26.7	1	97.9	111494097.238943	321316750.045927	0.346991239090421	111494097.238943	321316750.045927	2.8819171418314	SGQIFK	ICPL (K); ICPL (N-term)
		B7JC00													TRUE	6589	901.460538	451.233907	0.044786	2	593.76005009	48.36	1	161.4	321316750.045927	111494097.238943	0.346991239090421	321316750.045927	111494097.238943	2.8819171418314	SGQIFK	ICPL:13C(6) (K); ICPL:13C(6) (N-term)
		B7JC00													TRUE	6590	901.460538	901.460538	0.064362	1	593.85228317	28.54	1	273.9	321316750.045927	111494097.238943	0.346991239090421	321316750.045927	111494097.238943	2.8819171418314	SGQIFK	ICPL:13C(6) (K); ICPL:13C(6) (N-term)
		B7JC00													TRUE	7658	901.460538	451.233907	0.065786	2	684.75606792	32.7	1	22.6	8496783.66851586	3317954.43663277	0.390495341069725	8496783.66851586	3317954.43663277	2.56085001490823	SGQIFK	ICPL:13C(6) (K); ICPL:13C(6) (N-term)
		B7JC00													TRUE	19186	983.47923	492.243253	1.038894	2	1704.67846057	81.42	1	89.8							TSSLAYADR
		B7JC00													TRUE	3166	1088.500684	544.75398	-0.85856	2	311.75088043	36.34	1	48.3	17958586.8745692	22730272.6894657	0.790073534088841	17958586.8745692	22730272.6894657	1.26570497156731	TSSLAYADR	ICPL (N-term)
		B7JC00													TRUE	21449	1088.500684	544.75398	1.05984	2	1895.84856214	82.1	1	149.3	176953512.691489	417209107.239434	0.424136265534435	176953512.691489	417209107.239434	2.3577328355545	TSSLAYADR	ICPL (N-term)
		B7JC00													TRUE	21901	1094.520826	547.764051	-0.887502	2	1927.34116268	37.16	1	5.3	893796.778024673		0.01	893796.778024673		100	TSSLAYADR	ICPL:13C(6) (N-term)
		B7JC00													TRUE	21960	1094.520826	547.764051	-0.800302	2	1932.03250455	26.02	1	5	886792.516651482	604782.809802277	0.681989076865387	886792.516651482	604782.809802277	1.46629914454976	TSSLAYADR	ICPL:13C(6) (N-term)
		B7JC00													TRUE	21942	1094.520826	547.764051	0.114498	2	1930.60227947	37.68	1	18.9	892083.14188694	509697.065444234	0.571356011017224	892083.14188694	509697.065444234	1.75022224448052	TSSLAYADR	ICPL:13C(6) (N-term)
		B7JC00													TRUE	21887	1094.520826	547.764051	0.167098	2	1926.04097921	51.55	1	14.7	839004.134760556	616323.067015998	0.734588831545974	839004.134760556	616323.067015998	1.36130574963338	TSSLAYADR	ICPL:13C(6) (N-term)
		B7JC00													TRUE	21929	1094.520826	547.764051	0.189098	2	1929.53064588	47.32	1	17	837025.89428074	579967.411403867	0.692890644562717	837025.89428074	579967.411403867	1.44322918464442	TSSLAYADR	ICPL:13C(6) (N-term)
		B7JC00													TRUE	21437	1094.520826	547.764051	0.968098	2	1895.26954613	70.29	1	232.3	417209107.239434	176953512.691489	0.424136265534435	417209107.239434	176953512.691489	2.3577328355545	TSSLAYADR	ICPL:13C(6) (N-term)
		B7JC00													TRUE	21817	1094.520826	547.764051	1.113098	2	1920.34705442	41.01	1	12.7	748538.42026547	522708.113694413	0.698304989487424	748538.42026547	522708.113694413	1.43203903030111	TSSLAYADR	ICPL:13C(6) (N-term)
		B7JC00													TRUE	21843	1094.520826	547.764051	1.155498	2	1922.3091792	49.3	1	10.9	843249.315289876	561713.073767898	0.666129297211233	843249.315289876	561713.073767898	1.50121005664595	TSSLAYADR	ICPL:13C(6) (N-term)
		B7JC00													TRUE	21794	1094.520826	547.764051	1.165498	2	1918.12498775	59.57	1	11	760056.125915693	518777.001163051	0.682550911010742	760056.125915693	518777.001163051	1.46509217681531	TSSLAYADR	ICPL:13C(6) (N-term)
		B7JC00													TRUE	21856	1094.520826	547.764051	1.168698	2	1923.61014614	55.02	1	15.6	1139693.32331041	625463.112556467	0.54879948821646	1139693.32331041	625463.112556467	1.82215913365717	TSSLAYADR	ICPL:13C(6) (N-term)
		B7JC00													TRUE	6424	1175.562589	588.2849325	0.178935	2	585.88634983	32.51	2	37.9							NMNWGVVEAR
		B7JC00													TRUE	6322	1191.557508	596.282392	0.146016	2	580.31323302	56.08	1	16							NMNWGVVEAR	Oxidation (M)
		B7JC00													TRUE	10394	1197.568708	399.861086666667	0.04384	3	923.45209687	45.17	1	73.1	181593188.151598	474263640.904653	0.382895023968549	181593188.151598	474263640.904653	2.61168189034011	ADYLAAVHK	ICPL (K); ICPL (N-term)
		B7JC00													TRUE	10393	1197.568708	599.287992	0.066216	2	923.17379659	70.31	1	214.6	181593188.151598	474263640.904653	0.382895023968549	181593188.151598	474263640.904653	2.61168189034011	ADYLAAVHK	ICPL (K); ICPL (N-term)
		B7JC00													TRUE	10388	1209.608976	605.308126	0.040748	2	923.10100459	66.75	1	563.3	474263640.904653	181593188.151598	0.382895023968549	474263640.904653	181593188.151598	2.61168189034011	ADYLAAVHK	ICPL:13C(6) (K); ICPL:13C(6) (N-term)
		B7JC00													TRUE	10392	1209.608976	403.874509333333	0.050072	3	923.18458807	34.35	1	31.7	474263640.904653	181593188.151598	0.382895023968549	474263640.904653	181593188.151598	2.61168189034011	ADYLAAVHK	ICPL:13C(6) (K); ICPL:13C(6) (N-term)
		B7JC00													TRUE	11426	1209.608976	605.308126	0.139548	2	1012.28599288	58.42	1	36.4	12729849.6373589	4833351.66615918	0.37968646950664	12729849.6373589	4833351.66615918	2.63375200411905	ADYLAAVHK	ICPL:13C(6) (K); ICPL:13C(6) (N-term)
		B7JC00													TRUE	3089	1244.601789	622.8045325	0.191335	2	307.84428843	32.24	1	85	34573893.4131869	94949067.3639863	0.364130942757428	34573893.4131869	94949067.3639863	2.74626482557997	TSSLAYADRR	ICPL (N-term)
		B7JC00													TRUE	3085	1250.621931	625.8146035	0.140793	2	307.70449696	31.22	1	75.5	94949067.3639863	34573893.4131869	0.364130942757428	94949067.3639863	34573893.4131869	2.74626482557997	TSSLAYADRR	ICPL:13C(6) (N-term)
		B7JC00													TRUE	8638	1296.578962	648.793119	0.099962	2	768.18298542	65.52	1	27.2	29090609.0052603	37349560.7200533	0.778874194085	29090609.0052603	37349560.7200533	1.28390439379594	NMNWGVVEAR	ICPL (N-term); Oxidation (M)
		B7JC00													TRUE	4207	1302.599103	651.8031895	-0.837979	2	400.6690779	30.12	1	38.5	12895771.7228245	6320829.2487853	0.490147420770322	12895771.7228245	6320829.2487853	2.04020251382408	NMNWGVVEAR	ICPL:13C(6) (N-term); Oxidation (M)
		B7JC00													TRUE	8637	1302.599103	651.8031895	0.100221	2	768.17146914	58.63	1	92.6	37349560.7200533	29090609.0052603	0.778874194085	37349560.7200533	29090609.0052603	1.28390439379594	NMNWGVVEAR	ICPL:13C(6) (N-term); Oxidation (M)
		B7JC00													TRUE	4340	1302.599103	651.8031895	0.205421	2	407.59866936	54.82	1	83.3	47781384.1992981	17699484.0142176	0.37042635559473	47781384.1992981	17699484.0142176	2.69959192939841	NMNWGVVEAR	ICPL:13C(6) (N-term); Oxidation (M)
TRUE	Elongation factor G	B7J464	572.139	21.1731	27	14	0.78	0.06	14	1.37	0.1	94181867	1115.9		TRUE	4246	884.481595	442.7444355	0.068129	2	402.72123629	22.03	1	32.1	11008693.0060885	7272485.90852994	0.660613017776751	11008693.0060885	7272485.90852994	1.51374552588357	YKVPR	ICPL:13C(6) (K); ICPL:13C(6) (N-term)
		B7J464													TRUE	13722	901.456647	901.456647	0.561753	1	1204.24056949	25.21	1	3.1	11634305.5571307	14986020.5619931	0.776343893897832	11634305.5571307	14986020.5619931	1.28808896142565	IAFVNK	ICPL (K); ICPL (N-term)
		B7J464													TRUE	13721	901.456647	451.2319615	1.073677	2	1204.22658656	43.48	1	46.5	11634305.5571307	14986020.5619931	0.776343893897832	11634305.5571307	14986020.5619931	1.28808896142565	IAFVNK	ICPL (K); ICPL (N-term)
		B7J464													TRUE	13719	913.496915	913.496915	0.023685	1	1204.10201962	27.87	1	56	14986020.5619931	11634305.5571307	0.776343893897832	14986020.5619931	11634305.5571307	1.28808896142565	IAFVNK	ICPL:13C(6) (K); ICPL:13C(6) (N-term)
		B7J464													TRUE	13715	913.496915	457.2520955	0.092609	2	1203.86141108	43.59	1	51	14986020.5619931	11634305.5571307	0.776343893897832	14986020.5619931	11634305.5571307	1.28808896142565	IAFVNK	ICPL:13C(6) (K); ICPL:13C(6) (N-term)
		B7J464													TRUE	14849	915.439283	458.2232795	0.100041	2	1298.83857251	28.54	3	33.9	6470736.25582537	12557611.1562583	0.515284011848111	6470736.25582537	12557611.1562583	1.94067732940794	MGIALGK	ICPL (K); ICPL (N-term); Oxidation (M)
		B7J464													TRUE	14847	927.479551	927.479551	0.070049	1	1298.68784772	20.57	3	33.1	12557611.1562583	6470736.25582537	0.515284011848111	12557611.1562583	6470736.25582537	1.94067732940794	MGIALGK	ICPL:13C(6) (K); ICPL:13C(6) (N-term); Oxidation (M)
		B7J464													TRUE	14843	927.479551	464.2434135	0.106973	2	1298.54290585	23.23	3	48.3	12557611.1562583	6470736.25582537	0.515284011848111	12557611.1562583	6470736.25582537	1.94067732940794	MGIALGK	ICPL:13C(6) (K); ICPL:13C(6) (N-term); Oxidation (M)
		B7J464													TRUE	11563	1032.50102	516.754148	0.092904	2	1020.82335127	56.6	1	3.9	1506845.56832772		0.01	1506845.56832772		100	IAGSMGFK	ICPL:13C(6) (K); ICPL:13C(6) (N-term)
		B7J464													TRUE	5590	1083.546934	542.277105	0.09339	2	508.23225145	39.4	1	64.2	11042320.8798669	17584802.2615773	0.627946832475579	11042320.8798669	17584802.2615773	1.59249151087786	VVDQIATK	ICPL (K); ICPL (N-term)
		B7J464													TRUE	5587	1095.587202	548.297239	0.069122	2	507.81611813	52.23	1	31.4	17584802.2615773	11042320.8798669	0.627946832475579	17584802.2615773	11042320.8798669	1.59249151087786	VVDQIATK	ICPL:13C(6) (K); ICPL:13C(6) (N-term)
		B7J464													TRUE	21583	1167.54289	584.275083	0.159834	2	1903.08377067	36.07	1	86.1	27528313.9044069	35718237.8160611	0.770707503717567	27528313.9044069	35718237.8160611	1.29750910063341	LAQEDPSFR	ICPL (N-term)
		B7J464													TRUE	21578	1173.563032	587.285154	-0.825508	2	1903.22621282	32.55	1	20.3	35718237.8160611	27528313.9044069	0.770707503717567	35718237.8160611	27528313.9044069	1.29750910063341	LAQEDPSFR	ICPL:13C(6) (N-term)
		B7J464													TRUE	4584	1187.536741	594.2720085	0.187183	2	422.5510779	60.4	1	138	26524890.482889	34816559.0853927	0.761846982576103	26524890.482889	34816559.0853927	1.3125995414704	EFINPTEK	ICPL (K); ICPL (N-term)
		B7J464													TRUE	4577	1199.577009	600.2921425	0.224515	2	422.1757611	66.59	1	71.4	34816559.0853927	26524890.482889	0.761846982576103	34816559.0853927	26524890.482889	1.3125995414704	EFINPTEK	ICPL:13C(6) (K); ICPL:13C(6) (N-term)
		B7J464													TRUE	10215	1220.595945	610.8016105	0.134979	2	912.66638007	56.86	1	47.9	5291861.89607815	8508854.426433	0.621924131130841	5291861.89607815	8508854.426433	1.60791316809288	GQYGHVWLR	ICPL (N-term)
		B7J464													TRUE	10213	1220.595945	610.8016105	0.135379	2	912.52783819	45.19	1	56.8	5291861.89607815	8508854.426433	0.621924131130841	5291861.89607815	8508854.426433	1.60791316809288	GQYGHVWLR	ICPL (N-term)
		B7J464													TRUE	10403	1480.681516	740.844396	0.061808	2	924.3864462	80.29	1	58.9	9219158.41469999	11062263.1357951	0.833388096226783	9219158.41469999	11062263.1357951	1.19992114661532	SINWDDALQGTR	ICPL (N-term)
		B7J464													TRUE	10407	1480.681516	740.844396	0.110208	2	924.50841313	84.2	1	40.8	9219158.41469999	11062263.1357951	0.833388096226783	9219158.41469999	11062263.1357951	1.19992114661532	SINWDDALQGTR	ICPL (N-term)
		B7J464													TRUE	789	1716.874433	858.9408545	0.060691	2	79.31527467	93.21	1	50.1	12611057.2968783	12753756.3933129	0.988811210436054	12611057.2968783	12753756.3933129	1.01131539513899	IATDPFVGQLTFFR	ICPL (N-term)
		B7J464													TRUE	788	1716.874433	858.9408545	0.060691	2	79.30219147	101.73	1	4.7	12611057.2968783	12753756.3933129	0.988811210436054	12611057.2968783	12753756.3933129	1.01131539513899	IATDPFVGQLTFFR	ICPL (N-term)
		B7J464													TRUE	1747	1716.874433	858.9408545	0.181891	2	169.51583935	68.8	1	39.8	10060208.8035292	7814131.35264386	1.2874378929048	10060208.8035292	7814131.35264386	0.776736497745715	IATDPFVGQLTFFR	ICPL (N-term)
		B7J464													TRUE	2659	1716.874433	858.9408545	1.009491	2	259.54457044	38.96	1	15.7	2922809.73286741	3085256.97299516	0.947347257765032	2922809.73286741	3085256.97299516	1.05557913616511	IATDPFVGQLTFFR	ICPL (N-term)
		B7J464													TRUE	12852	1766.809934	883.908605	0.05379	2	1125.326284	74	1	28.1	17160775.363515	13649020.7958612	0.795361544378694	17160775.363515	13649020.7958612	1.25728985398855	FADDSEPFSALAFK	ICPL:13C(6) (K); ICPL:13C(6) (N-term)
		B7J464													TRUE	15805	2064.018522	688.677691333333	-0.680374	3	1384.67947493	48.41	1	25.8	3550872.08322535	8164754.46066528	0.434902494659469	3550872.08322535	8164754.46066528	2.29936597807517	TTTTERILFYTGVSHK	ICPL (K); ICPL (N-term)
		B7J464													TRUE	17909	2138.123762	713.379438	0.307686	3	1573.1944727	24.14	1	10.4	4143855.73441084	3964641.35036835	0.956751780098356	4143855.73441084	3964641.35036835	1.0452031768336	KATISGAVVPVLCGSAFK	2 ICPL:13C(6) (K); ICPL:13C(6) (N-term)
TRUE	ATP synthase subunit alpha	B7JB86	563.477	32.4903	29	16	0.92	0.04	16	1.12	0.05	135682564	1108.2		TRUE	6388	677.372922	677.372922	0.082278	1	583.69026663	23.77	1	37	4641447.04303722	5361402.39798045	0.865715105582371	4641447.04303722	5361402.39798045	1.15511441760889	LGGGIR	ICPL (N-term)
		B7JB86													TRUE	7609	854.41551	427.711393	0.044014	2	682.01031003	30.53	1	12.3	15102929.6667675	14515604.3395278	1.04046165171644	15102929.6667675	14515604.3395278	0.961111827956667	IAGFEGR	ICPL (N-term)
		B7JB86													TRUE	7604	860.435651	430.7214635	0.058673	2	681.82532605	30.71	1	18.4	14515604.3395278	15102929.6667675	1.04046165171644	14515604.3395278	15102929.6667675	0.961111827956667	IAGFEGR	ICPL:13C(6) (N-term)
		B7JB86													TRUE	4461	920.483579	460.7454275	0.140345	2	414.83809442	33.64	1	4.9	25402828.2088118	25998958.1894545	0.977071005064948	25402828.2088118	25998958.1894545	1.02346707129389	ELIIGDR	ICPL (N-term)
		B7JB86													TRUE	4462	920.483579	460.7454275	0.140345	2	414.84939469	39.23	1	52.5	25402828.2088118	25998958.1894545	0.977071005064948	25402828.2088118	25998958.1894545	1.02346707129389	ELIIGDR	ICPL (N-term)
		B7JB86													TRUE	7614	945.515226	473.261251	0.055298	2	682.26971804	51.82	1	50.9	23260465.1399761	28022782.4422152	0.830055516005263	23260465.1399761	28022782.4422152	1.20473869604845	IAPGVIDR	ICPL (N-term)
		B7JB86													TRUE	7612	951.535367	476.2713215	0.076157	2	682.16290152	47.99	1	40.2	28022782.4422152	23260465.1399761	0.830055516005263	28022782.4422152	23260465.1399761	1.20473869604845	IAPGVIDR	ICPL:13C(6) (N-term)
		B7JB86													TRUE	6417	964.521055	482.7641655	0.050069	2	585.17091622	80.67	1	74.4	26174841.3174741	29327094.7366469	0.892513955184461	26174841.3174741	29327094.7366469	1.12043066014954	ASTVAGVVR	ICPL (N-term)
		B7JB86													TRUE	6420	964.521055	482.7641655	0.065669	2	585.2884501	60.73	1	37.5	26174841.3174741	29327094.7366469	0.892513955184461	26174841.3174741	29327094.7366469	1.12043066014954	ASTVAGVVR	ICPL (N-term)
		B7JB86													TRUE	10376	983.494474	492.250875	0.06225	2	922.19532139	61.94	1	77	13401291.6429818	12975613.0267884	1.03280605049755	13401291.6429818	12975613.0267884	0.968236000862173	LDLAQYR	ICPL (N-term)
		B7JB86													TRUE	6832	1080.623899	540.8155875	0.183625	2	611.8602581	22.39	4	15.9	1716610.8229233	999218.029948798	0.582087690818109	1716610.8229233	999218.029948798	1.71795421166616	RVTELLK	ICPL:13C(6) (K); ICPL:13C(6) (N-term)
		B7JB86													TRUE	11557	1093.590177	547.2987265	0.112747	2	1020.33679341	28.47	1	6.4	1577447.0907738	1787519.94686487	1.1331726796542	1577447.0907738	1787519.94686487	0.882478035302757	VMQVPIGK	ICPL:13C(6) (K); ICPL:13C(6) (N-term)
		B7JB86													TRUE	4566	1131.510541	566.2589085	0.185983	2	421.4814027	59.76	1	70.8	12103915.100301	13746824.2162015	0.880488097464415	12103915.100301	13746824.2162015	1.13573369461751	VNADFVEK	ICPL (K); ICPL (N-term)
		B7JB86													TRUE	4565	1143.550809	572.2790425	0.121115	2	421.61026136	46.79	1	12.6	13746824.2162015	12103915.100301	0.880488097464415	13746824.2162015	12103915.100301	1.13573369461751	VNADFVEK	ICPL:13C(6) (K); ICPL:13C(6) (N-term)
		B7JB86													TRUE	6702	1406.706296	703.856786	0.158228	2	601.90734982	57.93	1	56.4	17871751.3789871	20344122.9654342	0.878472441862063	17871751.3789871	20344122.9654342	1.13833963633548	VVNALGQPVDGK	ICPL (K); ICPL (N-term)
		B7JB86													TRUE	6701	1418.746564	709.87692	0.15476	2	601.91477437	72.02	1	25.9	20344122.9654342	17871751.3789871	0.878472441862063	20344122.9654342	17871751.3789871	1.13833963633548	VVNALGQPVDGK	ICPL:13C(6) (K); ICPL:13C(6) (N-term)
		B7JB86													TRUE	15911	1430.706235	715.8567555	1.190689	2	1393.25257414	60.06	1	86.6	13422181.4651195	15451264.0310879	0.868678539057651	13422181.4651195	15451264.0310879	1.15117382902634	ALLAYLNSNNK	ICPL (K); ICPL (N-term)
		B7JB86													TRUE	15909	1442.746503	721.8768895	0.157821	2	1392.85353307	61.56	1	53.5	15451264.0310879	13422181.4651195	0.868678539057651	15451264.0310879	13422181.4651195	1.15117382902634	ALLAYLNSNNK	ICPL:13C(6) (K); ICPL:13C(6) (N-term)
		B7JB86													TRUE	14850	1452.748136	726.877706	-0.940012	2	1298.81444771	22.86	1	1.8	2106931.8861839	1894284.77103322	1.11225720567594	2106931.8861839	1894284.77103322	0.899072619981165	TAVAVDAILNQK	ICPL (K); ICPL (N-term)
		B7JB86													TRUE	13794	1452.748136	726.877706	1.170188	2	1209.17299457	70.55	1	42	6622914.4126394	7104434.07527259	0.932222657352941	6622914.4126394	7104434.07527259	1.07270510120352	TAVAVDAILNQK	ICPL (K); ICPL (N-term)
		B7JB86													TRUE	13793	1464.788404	732.89784	0.14252	2	1209.03893643	86.3	1	49.5	7104434.07527259	6622914.4126394	0.932222657352941	7104434.07527259	6622914.4126394	1.07270510120352	TAVAVDAILNQK	ICPL:13C(6) (K); ICPL:13C(6) (N-term)
		B7JB86													TRUE	6724	1495.685209	748.3462425	0.166315	2	603.17634182	56.65	1	19.5	5542692.62926806	7819260.35600687	0.708851269418351	5542692.62926806	7819260.35600687	1.41073317230644	KDLTDDLKK	3 ICPL (K); ICPL (N-term)
		B7JB86													TRUE	6719	1519.765729	760.3865025	0.163595	2	602.94030823	59.26	1	62.5	7819260.35600687	5542692.62926806	0.708851269418351	7819260.35600687	5542692.62926806	1.41073317230644	KDLTDDLKK	3 ICPL:13C(6) (K); ICPL:13C(6) (N-term)
		B7JB86													TRUE	9284	1658.759763	829.8835195	0.129761	2	828.8711835	101.82	1	45.4	12882125.1275717	14226258.6670575	0.90551742584308	12882125.1275717	14226258.6670575	1.10434097838476	EAYPGDVFYLHSR	ICPL (N-term)
		B7JB86													TRUE	9283	1658.759763	829.8835195	0.129761	2	828.84583363	57.38	1	52	12882125.1275717	14226258.6670575	0.90551742584308	12882125.1275717	14226258.6670575	1.10434097838476	EAYPGDVFYLHSR	ICPL (N-term)
		B7JB86													TRUE	14794	1762.879194	881.943235	1.06513	2	1295.05279812	34.06	1	22.1	2509790.80221854	2337114.48548916	1.07388440651988	2509790.80221854	2337114.48548916	0.931198920413308	MQQLNPSEISELIR	ICPL (N-term)
TRUE	Sulfate adenylyltransferase, large subunit	B7JAM9	560.765	30.8889	26	16	0.22	0.01	16	4.8	0.3	98392836	1297.2		TRUE	6368	751.409696	376.208486	-0.966572	2	582.82339142	29.36	1	24.5	6776939.72022531	31183835.5346084	0.217322199275459	6776939.72022531	31183835.5346084	4.60146272830824	STLIGR	ICPL (N-term)
		B7JAM9													TRUE	6433	860.472028	430.739652	0.078096	2	586.06410022	37.63	1	54.1	25911417.987191	3511988.59480073	0.135538263345404	25911417.987191	3511988.59480073	7.37799035724408	IVQAYR	ICPL:13C(6) (N-term)
		B7JAM9													TRUE	6463	865.429838	433.218557	0.089686	2	587.5652581	33.77	1	79.3	42160045.7500778	8488364.08165056	0.201336690476312	42160045.7500778	8488364.08165056	4.96680459798089	YFATPR	ICPL:13C(6) (N-term)
		B7JAM9													TRUE	20386	872.420408	436.713842	0.101316	2	1804.61795713	26.45	1	57	19501414.0588664	4014920.72029725	0.205878440823723	19501414.0588664	4014920.72029725	4.85723515293288	LDDSGVR	ICPL:13C(6) (N-term)
		B7JAM9													TRUE	10655	944.491498	944.491498	0.010802	1	940.9379966	39.6	1	40.5	12455010.7287007	1971104.45502536	0.158257949186927	12455010.7287007	1971104.45502536	6.31879791907858	LLFDSK	ICPL:13C(6) (K); ICPL:13C(6) (N-term)
		B7JAM9													TRUE	11697	944.491498	472.749387	0.034426	2	1030.47577634	43.97	1	43.6	12280248.5823006	2476014.57182175	0.201625769643655	12280248.5823006	2476014.57182175	4.95968348573379	LLFDSK	ICPL:13C(6) (K); ICPL:13C(6) (N-term)
		B7JAM9													TRUE	11699	944.491498	944.491498	0.057102	1	1030.65729315	32.25	1	34.8	12280248.5823006	2476014.57182175	0.201625769643655	12280248.5823006	2476014.57182175	4.95968348573379	LLFDSK	ICPL:13C(6) (K); ICPL:13C(6) (N-term)
		B7JAM9													TRUE	15732	1034.578168	517.792722	0.115956	2	1380.03667442	36.81	1	51.6	6523192.54658095	29651284.1327024	0.219996965979174	6523192.54658095	29651284.1327024	4.54551723269977	FPVQLVAR	ICPL (N-term)
		B7JAM9													TRUE	15726	1040.59831	520.802793	0.148014	2	1379.77669094	37.08	1	98.3	29651284.1327024	6523192.54658095	0.219996965979174	29651284.1327024	6523192.54658095	4.54551723269977	FPVQLVAR	ICPL:13C(6) (N-term)
		B7JAM9													TRUE	12584	1179.588865	590.2980705	0.137659	2	1108.47998373	44.3	1	46.9	19142440.2437577	4426160.95404437	0.231222398904326	19142440.2437577	4426160.95404437	4.32484052037612	QFFQELTR	ICPL:13C(6) (N-term)
		B7JAM9													TRUE	13641	1179.588865	590.2980705	1.192259	2	1198.65550283	44.84	1	52	11495101.1146154	3157371.99439428	0.274671093617424	11495101.1146154	3157371.99439428	3.64071801961386	QFFQELTR	ICPL:13C(6) (N-term)
		B7JAM9													TRUE	5701	1319.590269	660.2987725	0.184055	2	515.39231813	55.4	1	36.7	4545501.2040128	24776617.5021985	0.183459312136109	4545501.2040128	24776617.5021985	5.45079989866145	FITAGSVDDGK	ICPL (K); ICPL (N-term)
		B7JAM9													TRUE	5695	1331.630536	666.318906	0.177188	2	514.96782639	91.37	1	68.2	24776617.5021985	4545501.2040128	0.183459312136109	24776617.5021985	4545501.2040128	5.45079989866145	FITAGSVDDGK	ICPL:13C(6) (K); ICPL:13C(6) (N-term)
		B7JAM9													TRUE	11541	1458.814252	729.910764	0.103072	2	1019.29624302	66.92	1	74.9	15711316.3759474	2849022.24275424	0.181335680256292	15711316.3759474	2849022.24275424	5.51463450870035	LVVQPGGPAATVK	ICPL:13C(6) (K); ICPL:13C(6) (N-term)
		B7JAM9													TRUE	10342	1758.854139	879.9307075	0.073385	2	919.92460458	87.3	1	8.4	5216935.32216397	2111854.71953008	0.404807533372694	5216935.32216397	2111854.71953008	2.47030975848794	FIIADTPGHEQYTR	ICPL:13C(6) (N-term)
		B7JAM9													TRUE	9287	1758.854139	879.9307075	0.148385	2	829.09354136	94.09	1	75.2	24843341.6137402	5530154.46521693	0.222601071594908	24843341.6137402	5530154.46521693	4.49234135682785	FIIADTPGHEQYTR	ICPL:13C(6) (N-term)
		B7JAM9													TRUE	9288	1758.854139	586.956230333333	0.148409	3	829.10553337	63.55	1	46.8	24843341.6137402	5530154.46521693	0.222601071594908	24843341.6137402	5530154.46521693	4.49234135682785	FIIADTPGHEQYTR	ICPL:13C(6) (N-term)
		B7JAM9													TRUE	13685	1874.96066	937.983968	1.061664	2	1201.52645269	80.98	1	42.5	10276265.8202493	41817078.1553109	0.245743276995171	10276265.8202493	41817078.1553109	4.06928731572034	TIPLSALAGDNVVTAGDR	ICPL (N-term)
		B7JAM9													TRUE	13682	1880.980802	627.665118	0.364746	3	1201.27878603	40.65	1	43.3	41817078.1553109	10276265.8202493	0.245743276995171	41817078.1553109	10276265.8202493	4.06928731572034	TIPLSALAGDNVVTAGDR	ICPL:13C(6) (N-term)
		B7JAM9													TRUE	13681	1880.980802	940.994039	1.031522	2	1201.25012789	66.43	1	88.2	41817078.1553109	10276265.8202493	0.245743276995171	41817078.1553109	10276265.8202493	4.06928731572034	TIPLSALAGDNVVTAGDR	ICPL:13C(6) (N-term)
		B7JAM9													TRUE	1755	2425.263975	809.092842333333	0.414473	3	169.96477321	32.43	1	47.3	17696425.6458742	4973392.90754104	0.281039403496748	17696425.6458742	4973392.90754104	3.55821990638253	ATGAFILIDEVTHQTVAAGMIR	ICPL:13C(6) (N-term)
		B7JAM9													TRUE	15698	2439.249418	813.754656666667	0.75883	3	1378.38826642	24.36	1	30.3	6718856.09323101	1217666.49076881	0.181231220593572	6718856.09323101	1217666.49076881	5.51781308278332	LLFDSKGIFADQLDAISHAR	ICPL:13C(6) (K); ICPL:13C(6) (N-term)
TRUE	Adenosylhomocysteinase	B7J553	551.364	26.2366	22	11	0.75	0.1	11	1.58	0.21	63401747	957.9		TRUE	284	1007.479215	504.2432455	0.105309	2	42.70635787	47.12	1	19	351997.516691983	609365.584312554	0.577645875897444	351997.516691983	609365.584312554	1.73116444127014	ALDEEVAR	ICPL (N-term)
		B7J553													TRUE	282	1013.499357	507.2533165	0.113167	2	42.82550826	63.54	1	7.1	609365.584312554	351997.516691983	0.577645875897444	609365.584312554	351997.516691983	1.73116444127014	ALDEEVAR	ICPL:13C(6) (N-term)
		B7J553													TRUE	5389	1092.55113	546.779203	0.133194	2	496.74870959	47.76	1	60.1	18735784.7395474	10853366.4298468	0.57928539320467	18735784.7395474	10853366.4298468	1.72626482858111	HSLSDAIK	ICPL:13C(6) (K); ICPL:13C(6) (N-term)
		B7J553													TRUE	6786	1171.541822	586.274549	0.152102	2	607.98863302	63.22	1	52.2	8917472.56400551	13122771.5584645	0.679541857775731	8917472.56400551	13122771.5584645	1.47157969528645	FADLPAAEK	ICPL (K); ICPL (N-term)
		B7J553													TRUE	6784	1183.58209	592.294683	0.140234	2	607.70468315	67.1	1	43.1	13122771.5584645	8917472.56400551	0.679541857775731	13122771.5584645	8917472.56400551	1.47157969528645	FADLPAAEK	ICPL:13C(6) (K); ICPL:13C(6) (N-term)
		B7J553													TRUE	7887	1183.58209	592.294683	0.344434	2	698.83155965	71.78	1	24.1	2265489.6787519	1523910.18835163	0.672662604753591	2265489.6787519	1523910.18835163	1.48662939329936	FADLPAAEK	ICPL:13C(6) (K); ICPL:13C(6) (N-term)
		B7J553													TRUE	7962	1256.57736	628.792318	0.218364	2	704.21575965	20.92	1	28.7	3869351.69781775	8316049.52155597	2.14921004111518	3869351.69781775	8316049.52155597	0.465287236179635	TWAWDEVK	ICPL:13C(6) (K); ICPL:13C(6) (N-term)
		B7J553													TRUE	11666	1301.652463	651.3298695	0.179061	2	1028.18978488	77.83	1	8.8	1004887.44487388	1658938.92049176	0.605741074889001	1004887.44487388	1658938.92049176	1.65087038250336	ALVLGYGDVGK	ICPL (K); ICPL (N-term)
		B7J553													TRUE	10614	1301.652463	651.3298695	0.187661	2	938.09843019	61.45	1	40	9097288.57775249	15012443.0840984	0.605983218506826	9097288.57775249	15012443.0840984	1.65021071452119	ALVLGYGDVGK	ICPL (K); ICPL (N-term)
		B7J553													TRUE	10612	1313.692731	657.3500035	0.132593	2	937.95989633	57.59	1	48.3	15012443.0840984	9097288.57775249	0.605983218506826	15012443.0840984	9097288.57775249	1.65021071452119	ALVLGYGDVGK	ICPL:13C(6) (K); ICPL:13C(6) (N-term)
		B7J553													TRUE	11665	1313.692731	657.3500035	1.147393	2	1028.33981795	74.91	1	10.1	1658938.92049176	1004887.44487388	0.605741074889001	1658938.92049176	1004887.44487388	1.65087038250336	ALVLGYGDVGK	ICPL:13C(6) (K); ICPL:13C(6) (N-term)
		B7J553													TRUE	12067	1391.663038	464.559196666667	1.16851	3	1078.52461732	23.28	1	141.2	14455498.7013534	129122.134347503	100	14455498.7013534	129122.134347503	0.01	YLGVSVDGPFK	ICPL (K); ICPL (N-term)
		B7J553													TRUE	12283	1440.73422	720.870748	0.162904	2	1091.99971705	89.5	1	74.3	29628143.670113	56437892.9679616	0.524968990017614	29628143.670113	56437892.9679616	1.90487441928036	LVNLGNATGHPSR	ICPL (N-term)
		B7J553													TRUE	12282	1446.754362	482.922971333333	0.116186	3	1092.13291706	63.67	1	50.4	56437892.9679616	29628143.670113	0.524968990017614	56437892.9679616	29628143.670113	1.90487441928036	LVNLGNATGHPSR	ICPL:13C(6) (N-term)
		B7J553													TRUE	12273	1446.754362	723.880819	0.134562	2	1091.82943387	36.96	1	126.6	56437892.9679616	29628143.670113	0.524968990017614	56437892.9679616	29628143.670113	1.90487441928036	LVNLGNATGHPSR	ICPL:13C(6) (N-term)
		B7J553													TRUE	15832	1453.723981	727.3656285	0.238543	2	1386.40995814	38.18	1	21.6	1942540.48046388	1907821.04167166	0.982126787502553	1942540.48046388	1907821.04167166	1.01819847775754	YMVEGFAGVLTR	ICPL:13C(6) (N-term)
		B7J553													TRUE	12661	1492.783323	746.8952995	-0.926799	2	1113.27755866	20.75	1	39.5	7219726.41543491	2828385.95085488	0.391758051220352	7219726.41543491	2828385.95085488	2.5525959119026	IPAINVNDSVTK	ICPL:13C(6) (K); ICPL:13C(6) (N-term)
		B7J553													TRUE	9127	2331.147642	777.720731333333	0.173906	3	820.02187523	86.77	1	24	2957346.73023559	4343321.96563109	0.680895119826993	2957346.73023559	4343321.96563109	1.46865496738189	HPELLAGVHGVSEETTTGVHR	ICPL (N-term)
TRUE	Phosphoglycerate kinase	B7JBC8	550.892	38.404	30	17	0.6	0.04	17	1.79	0.11	112606864	1593.1		TRUE	15727	759.39134	380.199308	-0.848816	2	1379.75801627	23.53	3	36.4	3883295.8673438	1348542.60560379	0.347267540684763	3883295.8673438	1348542.60560379	2.87962415959792	MNVLR	ICPL:13C(6) (N-term); Oxidation (M)
		B7JBC8													TRUE	14874	797.455579	797.455579	0.062621	1	1300.50983972	25.53	1	63.4	15442299.7499155	27592022.2178718	0.559665385450193	15442299.7499155	27592022.2178718	1.78678193434386	LTILK	ICPL (K); ICPL (N-term)
		B7JBC8													TRUE	5428	803.441007	402.2241415	0.072117	2	498.72455973	40.04	1	90.7	31012791.3116077	48952620.8769708	0.633526678572532	31012791.3116077	48952620.8769708	1.57846549138737	DVPLVR	ICPL (N-term)
		B7JBC8													TRUE	14872	809.495847	809.495847	0.048553	1	1300.47663064	33.77	1	162.9	27592022.2178718	15442299.7499155	0.559665385450193	27592022.2178718	15442299.7499155	1.78678193434386	LTILK	ICPL:13C(6) (K); ICPL:13C(6) (N-term)
		B7JBC8													TRUE	3084	821.426389	411.2168325	0.041335	2	307.61698816	46.11	1	34.2	10381995.0042566	17303801.9102937	0.599983463638738	10381995.0042566	17303801.9102937	1.66671260226952	AALASGAR	ICPL (N-term)
		B7JBC8													TRUE	14622	898.508817	898.508817	0.065283	1	1285.11363064	20.16	1	64	27245984.4313513	18523200.3774462	0.679850655575212	27245984.4313513	18523200.3774462	1.47091128294039	TLGDILR	ICPL:13C(6) (N-term)
		B7JBC8													TRUE	14621	898.508817	449.7580465	0.100507	2	1285.10203063	45.31	1	102.6	27245984.4313513	18523200.3774462	0.679850655575212	27245984.4313513	18523200.3774462	1.47091128294039	TLGDILR	ICPL:13C(6) (N-term)
		B7JBC8													TRUE	4452	1010.476911	505.7420935	0.154213	2	414.37801977	30.81	1	13.7	24454422.5949039	8590860.97651147	0.351300912674247	24454422.5949039	8590860.97651147	2.84656248794684	FHIEDK	ICPL:13C(6) (K); ICPL:13C(6) (N-term)
		B7JBC8													TRUE	3548	1014.431562	507.719419	0.159162	2	335.20899669	54.89	1	62.3	5114162.29912937	8932776.48577731	0.572516541443984	5114162.29912937	8932776.48577731	1.74667442355085	DWLDAGK	ICPL (K); ICPL (N-term)
		B7JBC8													TRUE	4628	1026.47183	513.739553	0.165494	2	425.68964429	59.52	1	23.5	1480294.26570727	930638.333569622	0.628684684612336	1480294.26570727	930638.333569622	1.59062249244488	DWLDAGK	ICPL:13C(6) (K); ICPL:13C(6) (N-term)
		B7JBC8													TRUE	3543	1026.47183	513.739553	0.172094	2	334.88534709	61.96	1	35.2	8932776.48577731	5114162.29912937	0.572516541443984	8932776.48577731	5114162.29912937	1.74667442355085	DWLDAGK	ICPL:13C(6) (K); ICPL:13C(6) (N-term)
		B7JBC8													TRUE	20660	1033.426145	517.2167105	1.141579	2	1821.38023232	45.69	1	51.7	11575806.986524	19569572.3841016	0.591520691373321	11575806.986524	19569572.3841016	1.69055793750565	EGVFDEK	ICPL (K); ICPL (N-term)
		B7JBC8													TRUE	20379	1054.495206	527.751241	0.252918	2	1804.1875406	72.2	1	27	18410246.8067029	31554815.8461198	0.583436990932929	18410246.8067029	31554815.8461198	1.71398114199269	AFSETAPAR	ICPL (N-term)
		B7JBC8													TRUE	20376	1060.515348	530.761312	0.284976	2	1804.14924033	55.29	1	65.5	31554815.8461198	18410246.8067029	0.583436990932929	31554815.8461198	18410246.8067029	1.71398114199269	AFSETAPAR	ICPL:13C(6) (N-term)
		B7JBC8													TRUE	21318	1165.538495	583.2728855	1.120829	2	1888.65752054	50.75	1	27.7	7864084.03861381	18767993.31389	0.419015709729271	7864084.03861381	18767993.31389	2.38654536519909	AQASTHGVGK	ICPL (K); ICPL (N-term)
		B7JBC8													TRUE	21315	1177.578763	589.2930195	0.107161	2	1888.50363788	49.33	1	95.5	18767993.31389	7864084.03861381	0.419015709729271	18767993.31389	7864084.03861381	2.38654536519909	AQASTHGVGK	ICPL:13C(6) (K); ICPL:13C(6) (N-term)
		B7JBC8													TRUE	18833	1284.691495	428.902015666667	0.079153	3	1658.1307667	21.68	1	2.3							VMLMSHLGRPK	Oxidation (M)
		B7JBC8													TRUE	20883	1284.691495	428.902015666667	0.095653	3	1838.22324087	21.72	1	5.6							VMLMSHLGRPK	Oxidation (M)
		B7JBC8													TRUE	3416	1285.559614	643.283445	0.14251	2	325.5900799	46.53	1	53.6	12704299.236971	27877626.5428776	0.455716673635432	12704299.236971	27877626.5428776	2.19434586850335	DWLDAGKDR	ICPL (K); ICPL (N-term)
		B7JBC8													TRUE	3411	1297.599882	649.303579	0.171642	2	325.34958017	45.22	1	47.9	27877626.5428776	12704299.236971	0.455716673635432	27877626.5428776	12704299.236971	2.19434586850335	DWLDAGKDR	ICPL:13C(6) (K); ICPL:13C(6) (N-term)
		B7JBC8													TRUE	15692	1320.742261	660.8747685	1.184663	2	1377.85726587	67.06	1	47	8234991.77104348	11651518.8159011	0.706774103973895	8234991.77104348	11651518.8159011	1.41487922997945	RPLVAIVAGSK	ICPL (K); ICPL (N-term)
		B7JBC8													TRUE	15690	1332.782529	666.8949025	1.111995	2	1377.73458268	62.58	1	37.9	11651518.8159011	8234991.77104348	0.706774103973895	11651518.8159011	8234991.77104348	1.41487922997945	RPLVAIVAGSK	ICPL:13C(6) (K); ICPL:13C(6) (N-term)
		B7JBC8													TRUE	11592	1334.677259	667.8422675	1.127065	2	1022.69448462	45.18	1	16.5	1294408.15198593	1545212.18388618	0.837689584307129	1294408.15198593	1545212.18388618	1.19375962019048	TLPAVAMLEER	ICPL (N-term)
		B7JBC8													TRUE	7875	1562.784955	781.8961155	0.089569	2	697.8751095	69.18	1	28.9	21382441.7706296	38780828.4491261	0.551366296846385	21382441.7706296	38780828.4491261	1.81367632682599	GGDVPLPSDVVVAK	ICPL (K); ICPL (N-term)
		B7JBC8													TRUE	7874	1574.825223	787.9162495	0.103501	2	697.79330951	54.5	1	59	38780828.4491261	21382441.7706296	0.551366296846385	38780828.4491261	21382441.7706296	1.81367632682599	GGDVPLPSDVVVAK	ICPL:13C(6) (K); ICPL:13C(6) (N-term)
		B7JBC8													TRUE	2542	1708.949277	854.9782765	0.145847	2	251.25434538	84.71	1	102.5	29400856.5076907	38751643.564743	0.758699600923253	29400856.5076907	38751643.564743	1.31804471596283	ASLAPVAAHLSQLLGR	ICPL (N-term)
		B7JBC8													TRUE	2532	1708.949277	854.9782765	0.189647	2	251.00939551	85.58	1	51.2	29400856.5076907	38751643.564743	0.758699600923253	29400856.5076907	38751643.564743	1.31804471596283	ASLAPVAAHLSQLLGR	ICPL (N-term)
		B7JBC8													TRUE	2543	1708.949277	570.321276333333	0.304571	3	251.30218698	60.19	1	130.7	29400856.5076907	38751643.564743	0.758699600923253	29400856.5076907	38751643.564743	1.31804471596283	ASLAPVAAHLSQLLGR	ICPL (N-term)
		B7JBC8													TRUE	2594	2095.058362	699.024304666667	0.357886	3	255.01602911	24.89	1	8.3	1288406.92757729	1132146.01321936	0.878717731942222	1288406.92757729	1132146.01321936	1.13802187397506	SLCEADLVPDAQAIIAAAR	ICPL:13C(6) (N-term)
TRUE	ATP synthase subunit beta	B7JB84	529.947	21.1087	15	9	1.06	0.05	9	0.97	0.05	107408636	598.6		TRUE	18253	1012.478986	506.743131	-0.905662	2	1616.51335817	35.86	1	7.5	4955092.75781606	4569570.75301033	0.922196813733181	4955092.75781606	4569570.75301033	1.0843672252042	GPVQTEDR	ICPL:13C(6) (N-term)
		B7JB84													TRUE	14822	1171.58949	586.298383	1.114234	2	1297.47066423	68.95	1	43.9	12696104.9659913	12879748.0827486	0.985741715165744	12696104.9659913	12879748.0827486	1.01446452413943	VGLFGGAGVGK	ICPL (K); ICPL (N-term)
		B7JB84													TRUE	14819	1183.629758	592.318517	0.174166	2	1297.3869645	58.74	1	54.3	12879748.0827486	12696104.9659913	0.985741715165744	12879748.0827486	12696104.9659913	1.01446452413943	VGLFGGAGVGK	ICPL:13C(6) (K); ICPL:13C(6) (N-term)
		B7JB84													TRUE	15964	1371.676572	686.341924	1.196352	2	1395.73553308	61.89	1	65.8	52478063.2333295	48675522.5919408	1.07812018112813	52478063.2333295	48675522.5919408	0.927540377691119	VIDLVCPFAK	ICPL (K); ICPL (N-term)
		B7JB84													TRUE	15963	1383.71684	692.362058	1.196084	2	1395.72454962	69.7	1	67	48675522.5919408	52478063.2333295	1.07812018112813	48675522.5919408	52478063.2333295	0.927540377691119	VIDLVCPFAK	ICPL:13C(6) (K); ICPL:13C(6) (N-term)
		B7JB84													TRUE	10665	1481.709318	741.358297	0.103006	2	942.049763	79.09	1	20.8	3874269.55350017	2999818.89423728	1.29150115060037	3874269.55350017	2999818.89423728	0.77429276740105	IMNVLGEPVDGK	ICPL (K); ICPL (N-term)
		B7JB84													TRUE	10662	1493.749586	747.378431	0.093938	2	941.91256299	74.88	1	19.1	2999818.89423728	3874269.55350017	1.29150115060037	2999818.89423728	3874269.55350017	0.77429276740105	IMNVLGEPVDGK	ICPL:13C(6) (K); ICPL:13C(6) (N-term)
		B7JB84													TRUE	14579	1508.731443	754.8693595	1.170481	2	1282.77208131	83.12	1	38.5	10395073.8812667	9852388.41670306	1.05508161489489	10395073.8812667	9852388.41670306	0.947793977150883	AGLTGLTMAEHFR	ICPL (N-term)
		B7JB84													TRUE	14578	1514.751584	757.87943	0.14854	2	1282.7595645	83.28	1	50	9852388.41670306	10395073.8812667	1.05508161489489	9852388.41670306	10395073.8812667	0.947793977150883	AGLTGLTMAEHFR	ICPL:13C(6) (N-term)
		B7JB84													TRUE	14484	1530.746503	765.8768895	0.169221	2	1277.42637252	39.27	1	24.4	4984721.04521786	4075869.0957094	0.817672455235911	4984721.04521786	4075869.0957094	1.22298359642246	AGLTGLTMAEHFR	ICPL:13C(6) (N-term); Oxidation (M)
		B7JB84													TRUE	15837	1555.81146	778.409368	0.244864	2	1386.69897415	74.04	1	29.5	4880405.5088575	3577056.32182535	1.3643636190685	4880405.5088575	3577056.32182535	0.732942439994651	YTLAGTEVSALLGR	ICPL (N-term)
		B7JB84													TRUE	12300	1637.875822	819.441549	0.145102	2	1093.32027545	48.71	1	64.8	36626310.8397406	39755920.2602187	0.921279411972014	36626310.8397406	39755920.2602187	1.08544702834451	TGAPISVPVGHATLGR	ICPL (N-term)
		B7JB84													TRUE	12313	1637.875822	819.441549	0.152902	2	1093.62042533	64.28	1	3.3	36626310.8397406	39755920.2602187	0.921279411972014	36626310.8397406	39755920.2602187	1.08544702834451	TGAPISVPVGHATLGR	ICPL (N-term)
		B7JB84													TRUE	12314	1637.875822	819.441549	0.158302	2	1093.70490852	67.28	1	95.8	36626310.8397406	39755920.2602187	0.921279411972014	36626310.8397406	39755920.2602187	1.08544702834451	TGAPISVPVGHATLGR	ICPL (N-term)
		B7JB84													TRUE	11491	1749.83769	875.422483	-0.004166	2	1016.26312674	47.39	1	13.9	1444540.6000704	1343105.00865641	1.07552320240059	1444540.6000704	1343105.00865641	0.929780034282834	VALVYGQMNEPPGNR	ICPL (N-term)
TRUE	Ribulose bisphosphate carboxylase large chain 2	B7JA24	523.759	39.1121	37	19	0.24	0.05	19	6.94	1.32	215361722	2393.1		TRUE	9369	798.414442	798.414442	-0.007642	1	835.08918297	31.97	1	103.7	47964965.5577514	49091010.1697051	0.977062101430364	47964965.5577514	49091010.1697051	1.02347639780118	LGLSAK	ICPL (K); ICPL (N-term)
		B7JA24													TRUE	3350	838.449628	419.728452	0.026096	2	322.14520522	32.43	1	64	27085902.9043006	2793830.55340394	0.103147034207243	27085902.9043006	2793830.55340394	9.69489823615097	GVAIEK	ICPL:13C(6) (K); ICPL:13C(6) (N-term)
		B7JA24													TRUE	3348	838.449628	838.449628	0.046972	1	321.89241323	39.52	1	61.8	27085902.9043006	2793830.55340394	0.103147034207243	27085902.9043006	2793830.55340394	9.69489823615097	GVAIEK	ICPL:13C(6) (K); ICPL:13C(6) (N-term)
		B7JA24													TRUE	20352	932.466337	466.7368065	1.085587	2	1803.09635713	31.8	1	37.6	35369314.6600254	4119800.572963	0.116479513741306	35369314.6600254	4119800.572963	8.58520067503839	HSPELK	ICPL:13C(6) (K); ICPL:13C(6) (N-term)
		B7JA24													TRUE	21454	979.439741	490.2235085	-0.015017	2	1895.92416267	41.37	1	83.1	51007351.2963226	4398038.29594606	0.0862236164821821	51007351.2963226	4398038.29594606	11.5977506024309	ACYEGLR	ICPL:13C(6) (N-term)
		B7JA24													TRUE	5303	1023.513578	512.260427	0.045746	2	491.88999333	50.83	1	31.8	9947458.40440716	1526429.37834484	0.153449184333213	9947458.40440716	1526429.37834484	6.51681535060175	AMHAVLDR	ICPL:13C(6) (N-term)
		B7JA24													TRUE	4526	1024.550062	512.778669	0.032062	2	418.95294456	49.84	1	18.9	38876092.2895195	3523278.93771153	0.0906284230285501	38876092.2895195	3523278.93771153	11.0340659870577	AVLTEAAK	ICPL:13C(6) (K); ICPL:13C(6) (N-term)
		B7JA24													TRUE	4510	1024.550062	512.778669	0.068262	2	418.35414456	63.79	1	84.3	38876092.2895195	3523278.93771153	0.0906284230285501	38876092.2895195	3523278.93771153	11.0340659870577	AVLTEAAK	ICPL:13C(6) (K); ICPL:13C(6) (N-term)
		B7JA24													TRUE	5480	1029.519102	515.263189	0.100822	2	501.4951432	37.7	1	47.1	28358986.1946497	2511651.29234032	0.0885663286797669	28358986.1946497	2511651.29234032	11.2909727083274	FIKEDR	ICPL:13C(6) (K); ICPL:13C(6) (N-term)
		B7JA24													TRUE	21283	1039.508497	520.2578865	0.068827	2	1886.75657921	32.89	1	36.9	5621984.05598151	3967217.85905625	0.705661527950321	5621984.05598151	3967217.85905625	1.41710998884213	AMHAVLDR	ICPL:13C(6) (N-term); Oxidation (M)
		B7JA24													TRUE	6199	1039.508497	520.2578865	0.134427	2	573.20269169	56.05	1	73.3	2930226.68806854	770148.456979651	0.2628289681872	2930226.68806854	770148.456979651	3.80475564355505	AMHAVLDR	ICPL:13C(6) (N-term); Oxidation (M)
		B7JA24													TRUE	10595	1100.527219	550.7672475	0.151105	2	936.602355	37.34	1	25.1	6694991.27466145	1437932.51858209	0.214777355128787	6694991.27466145	1437932.51858209	4.65598433037957	IAMETWK	ICPL:13C(6) (K); ICPL:13C(6) (N-term)
		B7JA24													TRUE	5798	1210.50514	605.756208	0.178984	2	523.48295973	60.67	1	13.7	830181.737138712		100	830181.737138712		0.01	FEFDTVDK	ICPL (K); ICPL (N-term)
		B7JA24													TRUE	7278	1219.586774	610.297025	0.06815	2	663.17968497	46.58	1	83.3	29396762.0346763	45555026.9119504	0.64530226469836	29396762.0346763	45555026.9119504	1.54966138305348	NPHHGIHFR	ICPL (N-term)
		B7JA24													TRUE	7276	1219.586774	407.200442	0.068274	3	663.15057617	30.87	1	422.2	29396762.0346763	45555026.9119504	0.64530226469836	29396762.0346763	45555026.9119504	1.54966138305348	NPHHGIHFR	ICPL (N-term)
		B7JA24													TRUE	7277	1225.606916	613.307096	0.112408	2	663.16669297	45.58	1	14.7	45555026.9119504	29396762.0346763	0.64530226469836	45555026.9119504	29396762.0346763	1.54966138305348	NPHHGIHFR	ICPL:13C(6) (N-term)
		B7JA24													TRUE	13893	1243.639631	622.3234535	0.156693	2	1215.46829482	62.27	1	28.5	12308486.8143762	3248671.32017167	0.263937506629754	12308486.8143762	3248671.32017167	3.78877565666625	DTDILAVFK	ICPL:13C(6) (K); ICPL:13C(6) (N-term)
		B7JA24													TRUE	12851	1243.639631	622.3234535	0.175093	2	1125.36995067	65.16	1	157.3	53521774.1282078	7022885.26443824	0.13121547965909	53521774.1282078	7022885.26443824	7.62105204811274	DTDILAVFK	ICPL:13C(6) (K); ICPL:13C(6) (N-term)
		B7JA24													TRUE	10155	1316.662366	658.834821	-0.052442	2	909.47050487	54.31	1	29.8	7729906.7614189	1468954.09759147	0.190035163803428	7729906.7614189	1468954.09759147	5.26218400839961	DNGMLLHIHR	ICPL:13C(6) (N-term)
		B7JA24													TRUE	10156	1316.662366	439.558972666667	-0.052418	3	909.48477153	35.63	1	24.3	7729906.7614189	1468954.09759147	0.190035163803428	7729906.7614189	1468954.09759147	5.26218400839961	DNGMLLHIHR	ICPL:13C(6) (N-term)
		B7JA24													TRUE	3088	1518.721372	759.864324	0.084352	2	307.83282177	77.42	1	75.6	75213396.7711617	6022079.00071721	0.0800665740312129	75213396.7711617	6022079.00071721	12.4896064568738	TCGGPPHGIQVER	ICPL:13C(6) (N-term)
		B7JA24													TRUE	3090	1518.721372	506.911974666667	0.106876	3	307.99262177	28.53	1	6.5	75213396.7711617	6022079.00071721	0.0800665740312129	75213396.7711617	6022079.00071721	12.4896064568738	TCGGPPHGIQVER	ICPL:13C(6) (N-term)
		B7JA24													TRUE	4601	1623.715299	812.3612875	0.065425	2	423.90203629	73.27	1	69.4	9293412.4096382	1084602.94700347	0.116706641134168	9293412.4096382	1084602.94700347	8.56849267772499	NTYWEPDYSVK	ICPL:13C(6) (K); ICPL:13C(6) (N-term)
		B7JA24													TRUE	5677	1623.715299	812.3612875	0.099425	2	513.79537627	56.88	1	45.2	7780120.10407172	1045220.24906638	0.134345001758952	7780120.10407172	1045220.24906638	7.44352217728385	NTYWEPDYSVK	ICPL:13C(6) (K); ICPL:13C(6) (N-term)
		B7JA24													TRUE	15875	1671.893201	836.4502385	1.101723	2	1389.38119922	46.05	1	16.5	4294179.54396443	837467.027688253	0.195023756951507	4294179.54396443	837467.027688253	5.12758043241189	LEDVRFPIAYVK	ICPL:13C(6) (K); ICPL:13C(6) (N-term)
		B7JA24													TRUE	9150	1685.843336	843.425306	0.130988	2	821.3717083	77.06	1	63.6	26484776.071572	7627742.19535425	0.288004783379749	26484776.071572	7627742.19535425	3.47216455318886	LSGGDHLHSGTVVGK	ICPL:13C(6) (K); ICPL:13C(6) (N-term)
		B7JA24													TRUE	9148	1685.843336	562.619296	0.142212	3	821.6414587	33.71	1	44.5	26484776.071572	7627742.19535425	0.288004783379749	26484776.071572	7627742.19535425	3.47216455318886	LSGGDHLHSGTVVGK	ICPL:13C(6) (K); ICPL:13C(6) (N-term)
TRUE	Ribosomal protein S1	B7J783	508.883	30.4577	43	13	0.8	0.03	13	1.27	0.05	210501845	2362.4		TRUE	13815	781.460676	391.233976	0.016848	2	1210.85889483	33.11	1	79.3	12567714.5307724	14430628.5959683	0.870905549761263	12567714.5307724	14430628.5959683	1.14823013847383	VLVLK	ICPL (K); ICPL (N-term)
		B7J783													TRUE	13811	781.460676	781.460676	0.562524	1	1210.59321963	29.09	1	8.6	12567714.5307724	14430628.5959683	0.870905549761263	12567714.5307724	14430628.5959683	1.14823013847383	VLVLK	ICPL (K); ICPL (N-term)
		B7J783													TRUE	13809	793.500944	397.25411	0.03778	2	1210.33936949	35.36	1	44.7	14430628.5959683	12567714.5307724	0.870905549761263	14430628.5959683	12567714.5307724	1.14823013847383	VLVLK	ICPL:13C(6) (K); ICPL:13C(6) (N-term)
		B7J783													TRUE	13810	793.500944	793.500944	0.060056	1	1210.64571083	29.11	1	120	14430628.5959683	12567714.5307724	0.870905549761263	14430628.5959683	12567714.5307724	1.14823013847383	VLVLK	ICPL:13C(6) (K); ICPL:13C(6) (N-term)
		B7J783													TRUE	12603	838.486021	419.7466485	0.019303	2	1109.5788088	32.99	1	57.3	10994885.7574874	9066978.88637985	0.824654215275074	10994885.7574874	9066978.88637985	1.21262946514672	ISLGVK	ICPL:13C(6) (K); ICPL:13C(6) (N-term)
		B7J783													TRUE	12605	838.486021	838.486021	0.022279	1	1109.68304187	39.49	1	58.1	10994885.7574874	9066978.88637985	0.824654215275074	10994885.7574874	9066978.88637985	1.21262946514672	ISLGVK	ICPL:13C(6) (K); ICPL:13C(6) (N-term)
		B7J783													TRUE	13720	840.461393	420.7343345	0.058731	2	1204.25499456	27	1	58.3	7396381.44100529	9338412.05325574	0.792038453521294	7396381.44100529	9338412.05325574	1.26256496203453	ISLGIK	ICPL (K); ICPL (N-term)
		B7J783													TRUE	13712	852.501661	852.501661	0.048939	1	1203.74645323	28.67	1	39.2	9338412.05325574	7396381.44100529	0.792038453521294	9338412.05325574	7396381.44100529	1.26256496203453	ISLGIK	ICPL:13C(6) (K); ICPL:13C(6) (N-term)
		B7J783													TRUE	13711	852.501661	426.7544685	0.102063	2	1203.59100256	32.77	1	24.8	9338412.05325574	7396381.44100529	0.792038453521294	9338412.05325574	7396381.44100529	1.26256496203453	ISLGIK	ICPL:13C(6) (K); ICPL:13C(6) (N-term)
		B7J783													TRUE	20260	898.483671	449.7454735	-0.880147	2	1797.54853206	27.58	1	9.6	11036627.4976209	6544083.50363894	0.592942319114202	11036627.4976209	6544083.50363894	1.68650468648266	NNVVVSR	ICPL:13C(6) (N-term)
		B7J783													TRUE	19173	997.484968	499.246122	0.157356	2	1703.78356032	29.72	1	148.6	12390163.4981576	17879744.5114437	0.692972066252259	12390163.4981576	17879744.5114437	1.44305961048071	RYPEATR	ICPL (N-term)
		B7J783													TRUE	19172	1003.505109	502.2561925	0.084615	2	1703.77138485	38.17	1	262.6	17879744.5114437	12390163.4981576	0.692972066252259	17879744.5114437	12390163.4981576	1.44305961048071	RYPEATR	ICPL:13C(6) (N-term)
		B7J783													TRUE	6809	1100.504728	550.756002	0.220396	2	609.91647515	45.06	1	4.2	5379656.40393882	6955973.01068766	0.773386612580746	5379656.40393882	6955973.01068766	1.29301436530309	TWVDLEK	ICPL (K); ICPL (N-term)
		B7J783													TRUE	3528	1104.499631	552.7534535	0.100493	2	333.60723882	53.33	1	29.6	12653216.6840382		100	12653216.6840382		0.01	DVAYLEGK	ICPL (K); ICPL (N-term)
		B7J783													TRUE	3520	1104.499631	552.7534535	0.118893	2	332.98793856	52.13	1	71.6	12653216.6840382		100	12653216.6840382		0.01	DVAYLEGK	ICPL (K); ICPL (N-term)
		B7J783													TRUE	3352	1105.506116	553.256696	0.131808	2	322.17645536	46.16	1	3.9	22963034.5508491	25280764.9770246	0.908320399786879	22963034.5508491	25280764.9770246	1.10093310712237	QLGEDPWR	ICPL (N-term)
		B7J783													TRUE	3354	1105.506116	553.256696	0.131808	2	322.18757162	50.67	1	49.4	22963034.5508491	25280764.9770246	0.908320399786879	22963034.5508491	25280764.9770246	1.10093310712237	QLGEDPWR	ICPL (N-term)
		B7J783													TRUE	6807	1112.544996	556.776136	0.210128	2	610.12859142	27.89	1	12.9	6955973.01068766	5379656.40393882	0.773386612580746	6955973.01068766	5379656.40393882	1.29301436530309	TWVDLEK	ICPL:13C(6) (K); ICPL:13C(6) (N-term)
		B7J783													TRUE	21567	1335.632764	668.32002	1.18216	2	1902.17972907	53.1	1	113.8	46908053.7970347	54932524.8219336	0.853921314359561	46908053.7970347	54932524.8219336	1.17106808693492	SEGPIPAEQFR	ICPL (N-term)
		B7J783													TRUE	21565	1341.652906	671.330091	0.205818	2	1902.06777121	30.7	1	121.8	54932524.8219336	46908053.7970347	0.853921314359561	54932524.8219336	46908053.7970347	1.17106808693492	SEGPIPAEQFR	ICPL:13C(6) (N-term)
		B7J783													TRUE	265	1378.659711	689.8334935	0.163013	2	41.16331626	56.59	1	40	804442.523647703	713790.993443865	1.12700010372289	804442.523647703	713790.993443865	0.887311364654391	AVVEQEQSVER	ICPL (N-term)
		B7J783													TRUE	263	1378.659711	689.8334935	0.167813	2	40.99879093	76.59	1	46.7	804442.523647703	713790.993443865	1.12700010372289	804442.523647703	713790.993443865	0.887311364654391	AVVEQEQSVER	ICPL (N-term)
		B7J783													TRUE	12519	1415.706617	472.573723	0.132831	3	1104.96453359	49.51	1	1.9	19035271.5657648	27210087.6999789	0.699566711274491	19035271.5657648	27210087.6999789	1.42945623895993	LGEGVEGFLPHR	ICPL (N-term)
		B7J783													TRUE	12518	1415.706617	708.3569465	0.152907	2	1104.73694213	55.6	1	67.6	19035271.5657648	27210087.6999789	0.699566711274491	19035271.5657648	27210087.6999789	1.42945623895993	LGEGVEGFLPHR	ICPL (N-term)
		B7J783													TRUE	12516	1415.706617	708.3569465	0.152907	2	1104.72483387	48.04	1	112.7	19035271.5657648	27210087.6999789	0.699566711274491	19035271.5657648	27210087.6999789	1.42945623895993	LGEGVEGFLPHR	ICPL (N-term)
		B7J783													TRUE	13575	1415.706617	708.3569465	1.136507	2	1194.97697802	44.52	1	30.1	8888611.82044524	12004209.3725051	0.740457913105388	8888611.82044524	12004209.3725051	1.35051565024962	LGEGVEGFLPHR	ICPL (N-term)
		B7J783													TRUE	13572	1421.726758	711.367017	0.143166	2	1194.78911137	36.36	1	37.2	12004209.3725051	8888611.82044524	0.740457913105388	12004209.3725051	8888611.82044524	1.35051565024962	LGEGVEGFLPHR	ICPL:13C(6) (N-term)
		B7J783													TRUE	10506	1544.759107	772.8831915	0.015217	2	930.88704673	96.88	1	55.6	19192081.5219357	25678395.3426514	0.747401902098531	19192081.5219357	25678395.3426514	1.3379682299339	SAATGTTSLGDLIK	ICPL (K); ICPL (N-term)
		B7J783													TRUE	10504	1556.799375	778.9033255	0.038749	2	930.80979658	97.51	1	65.9	25678395.3426514	19192081.5219357	0.747401902098531	25678395.3426514	19192081.5219357	1.3379682299339	SAATGTTSLGDLIK	ICPL:13C(6) (K); ICPL:13C(6) (N-term)
		B7J783													TRUE	15560	1605.802	803.404638	1.168124	2	1370.14922482	31.57	2	41.5							SFNDNAVVHGFLTGK
		B7J783													TRUE	17671	1630.906385	815.9568305	1.164139	2	1558.47879803	24.78	1	94.7	65336249.6635985	77848422.2757322	0.839275193428883	65336249.6635985	77848422.2757322	1.19150429779113	AFLPGSLVDVRPVR	ICPL (N-term)
		B7J783													TRUE	17668	1636.926526	546.313692666667	0.435622	3	1558.5272647	22.04	2	86.6	77848422.2757322	65336249.6635985	0.839275193428883	77848422.2757322	65336249.6635985	1.19150429779113	AFLPGSLVDVRPVR	ICPL:13C(6) (N-term)
TRUE	Polyribonucleotide nucleotidyltransferase	B7J4D8	480.36	18.8406	26	13	0.63	0.11	13	2.22	0.39	86689527	1022		TRUE	21564	835.430829	418.2190525	0.123695	2	1901.93336268	30.44	1	22.1	7833356.28107236	13170181.0998259	0.594779693741336	7833356.28107236	13170181.0998259	1.68129478952066	VLEVDR	ICPL (N-term)
		B7J4D8													TRUE	21560	841.450971	421.2291235	0.129353	2	1901.76907094	22.58	1	43.8	13170181.0998259	7833356.28107236	0.594779693741336	13170181.0998259	7833356.28107236	1.68129478952066	VLEVDR	ICPL:13C(6) (N-term)
		B7J4D8													TRUE	3301	898.508817	449.7580465	-0.040693	2	318.72848042	20.94	4	22.6	48469339.4644258	8602083.72273151	0.177474746257787	48469339.4644258	8602083.72273151	5.63460447802231	IETGIVR	ICPL:13C(6) (N-term)
		B7J4D8													TRUE	15922	987.512586	494.259931	0.115738	2	1393.65534107	34.66	1	74.2	17199745.7277028	10856406.2782862	0.631195742667306	17199745.7277028	10856406.2782862	1.58429458946317	IPGGFFK	ICPL:13C(6) (K); ICPL:13C(6) (N-term)
		B7J4D8													TRUE	6186	989.516309	495.2617925	0.080015	2	572.27643303	28.83	1	45.7							THGSALFTR
		B7J4D8													TRUE	8519	1094.537763	547.7725195	0.121361	2	761.57176035	52.6	1	42.1	7197329.45268911	18524857.193059	0.388522803586624	7197329.45268911	18524857.193059	2.57385149795215	THGSALFTR	ICPL (N-term)
		B7J4D8													TRUE	8516	1100.557905	550.7825905	0.101019	2	761.44262701	53.06	1	80.5	18524857.193059	7197329.45268911	0.388522803586624	18524857.193059	7197329.45268911	2.57385149795215	THGSALFTR	ICPL:13C(6) (N-term)
		B7J4D8													TRUE	10345	1221.637479	611.3223775	1.170645	2	920.21412993	37.14	1	17.5	3213891.45868735	1911513.39484339	1.68133347501374	3213891.45868735	1911513.39484339	0.594766008564616	IRDVIGPGGK	ICPL (K); ICPL (N-term)
		B7J4D8													TRUE	6764	1243.692274	622.349775	0.06205	2	606.55845009	20.59	2	39.3	3337569.92631414	601390.739058946	0.180188206490432	3337569.92631414	601390.739058946	5.54975278059112	GDMVRGLLKK	ICPL:13C(6) (N-term); Oxidation (M)
		B7J4D8													TRUE	5711	1243.692274	622.349775	0.08565	2	516.12153467	20.8	2	24.6	1801832.59827966	744469.88675511	0.413173725165096	1801832.59827966	744469.88675511	2.42028943055472	GDMVRGLLKK	ICPL:13C(6) (N-term); Oxidation (M)
		B7J4D8													TRUE	4282	1271.620634	636.313955	0.20249	2	404.46751949	23.46	1	3.9	17864333.3840473	8682552.94272602	0.48602725643709	17864333.3840473	8682552.94272602	2.05749777765691	VSDVHDHLK	ICPL:13C(6) (K); ICPL:13C(6) (N-term)
		B7J4D8													TRUE	15928	1348.748456	674.877866	0.265668	2	1394.08312454	69.58	1	20.5	6373585.85116938	4802438.48670947	0.753490829001441	6373585.85116938	4802438.48670947	1.3271561663534	APVAGVAMGLIK	ICPL:13C(6) (K); ICPL:13C(6) (N-term)
		B7J4D8													TRUE	10328	1586.792112	793.899694	0.090212	2	919.2371966	32.2	1	47.8	8502554.43580425	13217048.6614638	0.6433020452285	8502554.43580425	13217048.6614638	1.55447974620507	DGLLHISQISNER	ICPL (N-term)
		B7J4D8													TRUE	10324	1586.792112	793.899694	0.117012	2	919.08699659	84.16	1	19.8	8502554.43580425	13217048.6614638	0.6433020452285	8502554.43580425	13217048.6614638	1.55447974620507	DGLLHISQISNER	ICPL (N-term)
		B7J4D8													TRUE	10309	1586.792112	793.899694	0.144612	2	918.54578006	49.21	1	34.6	8502554.43580425	13217048.6614638	0.6433020452285	8502554.43580425	13217048.6614638	1.55447974620507	DGLLHISQISNER	ICPL (N-term)
		B7J4D8													TRUE	1739	1604.821287	802.9142815	0.180437	2	169.05243134	88.33	1	75.2	12321061.2981358	14464920.0118442	0.85178910689081	12321061.2981358	14464920.0118442	1.17399951691116	EIMAQALQQALAGR	ICPL (N-term)
		B7J4D8													TRUE	1740	1604.821287	802.9142815	0.181237	2	169.02078975	66.93	1	62.1	12321061.2981358	14464920.0118442	0.85178910689081	12321061.2981358	14464920.0118442	1.17399951691116	EIMAQALQQALAGR	ICPL (N-term)
		B7J4D8													TRUE	1737	1610.841428	805.924352	0.185296	2	168.76707242	80.55	1	24	14464920.0118442	12321061.2981358	0.85178910689081	14464920.0118442	12321061.2981358	1.17399951691116	EIMAQALQQALAGR	ICPL:13C(6) (N-term)
		B7J4D8													TRUE	3490	1635.760877	818.3840765	0.054047	2	330.48902176	89.02	1	37.1	3504633.13658939	5363113.99001441	0.653469820539834	3504633.13658939	5363113.99001441	1.530292553027	GDEQIIDALQGESR	ICPL (N-term)
		B7J4D8													TRUE	3491	1635.760877	818.3840765	0.085247	2	330.62991349	76.82	1	30.2	3504633.13658939	5363113.99001441	0.653469820539834	3504633.13658939	5363113.99001441	1.530292553027	GDEQIIDALQGESR	ICPL (N-term)
		B7J4D8													TRUE	596	1674.947828	558.98746	0.52392	3	64.6552416	23.18	1	63.5	8653322.66150589	13522299.0502186	0.639929839546479	8653322.66150589	13522299.0502186	1.56267130894959	LIDRPIRPLFPK	ICPL (K); ICPL (N-term)
TRUE	10 kDa chaperonin	B7J562	458.871	81.25	39	14	0.98	0.05	14	1.06	0.06	247518495	3787.7		TRUE	3368	755.372251	755.372251	0.063849	1	322.94358017	24	1	136.3	81620465.150184	100452993.805981	0.81252396825354	81620465.150184	100452993.805981	1.23073292489996	ALDVK	ICPL (K); ICPL (N-term)
		B7J562													TRUE	3369	755.372251	378.1897635	0.063873	2	322.95453856	24.7	1	119.6	81620465.150184	100452993.805981	0.81252396825354	81620465.150184	100452993.805981	1.23073292489996	ALDVK	ICPL (K); ICPL (N-term)
		B7J562													TRUE	3364	767.412519	384.2098975	0.089205	2	322.72961323	31.34	1	81.3	100452993.805981	81620465.150184	0.81252396825354	100452993.805981	81620465.150184	1.23073292489996	ALDVK	ICPL:13C(6) (K); ICPL:13C(6) (N-term)
		B7J562													TRUE	3363	767.412519	767.412519	0.089281	1	322.7185887	22.61	1	94.9	100452993.805981	81620465.150184	0.81252396825354	100452993.805981	81620465.150184	1.23073292489996	ALDVK	ICPL:13C(6) (K); ICPL:13C(6) (N-term)
		B7J562													TRUE	21713	884.414838	884.414838	0.064362	1	1912.08916267	35.86	1	230.2	54488107.7768896	62099482.4706557	0.877432558357267	54488107.7768896	62099482.4706557	1.13968873217128	ILEDGK	ICPL (K); ICPL (N-term)
		B7J562													TRUE	21712	884.414838	442.711057	0.075886	2	1912.00752107	34.6	1	292.7	54488107.7768896	62099482.4706557	0.877432558357267	54488107.7768896	62099482.4706557	1.13968873217128	ILEDGK	ICPL (K); ICPL (N-term)
		B7J562													TRUE	21710	896.455106	896.455106	0.041694	1	1911.95447948	30.85	1	214.8	62099482.4706557	54488107.7768896	0.877432558357267	62099482.4706557	54488107.7768896	1.13968873217128	ILEDGK	ICPL:13C(6) (K); ICPL:13C(6) (N-term)
		B7J562													TRUE	21709	896.455106	448.731191	1.046418	2	1911.93202935	35.29	1	116.6	62099482.4706557	54488107.7768896	0.877432558357267	62099482.4706557	54488107.7768896	1.13968873217128	ILEDGK	ICPL:13C(6) (K); ICPL:13C(6) (N-term)
		B7J562													TRUE	3341	991.451948	496.229612	0.112376	2	321.54153003	39.16	1	105.8	54016480.8653068	63288953.8607604	0.853489867823481	54016480.8653068	63288953.8607604	1.17166007201719	YAGTEIK	ICPL (K); ICPL (N-term)
		B7J562													TRUE	18462	997.466382	499.236829	0.046142	2	1630.67483337	32.8	1	80.9	4929379.92173773	5068033.87203651	1.0281280713802	4929379.92173773	5068033.87203651	0.972641471268804	LEEEQK	ICPL:13C(6) (K); ICPL:13C(6) (N-term)
		B7J562													TRUE	3338	1003.492216	502.249746	0.107308	2	321.42980523	35.1	1	53.3	63288953.8607604	54016480.8653068	0.853489867823481	63288953.8607604	54016480.8653068	1.17166007201719	YAGTEIK	ICPL:13C(6) (K); ICPL:13C(6) (N-term)
		B7J562													TRUE	8458	1011.548246	506.277761	0.036278	2	757.64091021	26.57	1	417.2	110928368.503141	156189946.431628	0.71021452428566	110928368.503141	156189946.431628	1.40802527378021	LRPLHDR	ICPL (N-term)
		B7J562													TRUE	5490	1083.546949	542.2771125	0.200775	2	502.00085146	64.76	1	90.3	32119773.3452818	26048225.3899804	1.2330887369255	32119773.3452818	26048225.3899804	0.810971643852112	TGDQVLFAK	ICPL (K)
		B7J562													TRUE	5489	1083.546949	542.2771125	0.200775	2	501.98946798	61.73	1	6.2	32119773.3452818	26048225.3899804	1.2330887369255	32119773.3452818	26048225.3899804	0.810971643852112	TGDQVLFAK	ICPL (K)
		B7J562													TRUE	4295	1148.548322	574.777799	0.132802	2	405.2489611	42.33	1	78.3	137468107.765123	148553074.04984	0.925380431501554	137468107.765123	148553074.04984	1.0806366397627	GEIVAAGHGK	ICPL (K); ICPL (N-term)
		B7J562													TRUE	19325	1153.567487	577.2873815	0.126437	2	1712.65122697	23.9	1	70.6	17735245.3854209	13279592.7021607	0.748768478448967	17735245.3854209	13279592.7021607	1.33552630590359	RLEEEQK	ICPL:13C(6) (K); ICPL:13C(6) (N-term)
		B7J562													TRUE	4294	1160.58859	580.797933	0.143534	2	405.1948363	44.02	1	247.1	148553074.04984	137468107.765123	0.925380431501554	148553074.04984	137468107.765123	1.0806366397627	GEIVAAGHGK	ICPL:13C(6) (K); ICPL:13C(6) (N-term)
		B7J562													TRUE	7824	1188.568403	594.7878395	0.208721	2	694.42330952	59.88	1	51.6	81803465.1005486	96411569.2682321	0.848481833886123	81803465.1005486	96411569.2682321	1.17857561595622	TGDQVLFAK	ICPL (K); ICPL (N-term)
		B7J562													TRUE	7821	1200.608671	600.8079735	0.191253	2	694.29576763	57.68	1	68.7	96411569.2682321	81803465.1005486	0.848481833886123	96411569.2682321	81803465.1005486	1.17857561595622	TGDQVLFAK	ICPL:13C(6) (K); ICPL:13C(6) (N-term)
		B7J562													TRUE	6566	1261.678678	631.342977	0.182046	2	592.68749969	33.81	1	44.1	15425447.3989668	11563013.3068	1.33403352479888	15425447.3989668	11563013.3068	0.74960634902392	TAGGIIIPDTAK	ICPL (K)
		B7J562													TRUE	6564	1261.678678	631.342977	0.203646	2	592.5109749	59.69	1	27.2	15425447.3989668	11563013.3068	1.33403352479888	15425447.3989668	11563013.3068	0.74960634902392	TAGGIIIPDTAK	ICPL (K)
		B7J562													TRUE	5565	1295.629987	648.3186315	0.135737	2	507.07225146	29.51	1	26.1	8476138.49317104	8342493.44867014	1.01601979615845	8476138.49317104	8342493.44867014	0.98423279131074	VEGEELLVMR	ICPL (N-term); Oxidation (M)
		B7J562													TRUE	3429	1295.629987	648.3186315	0.137137	2	326.50681323	42.3	1	3.9	6419304.6132732	6875193.60937076	0.933690740654024	6419304.6132732	6875193.60937076	1.07101843946694	VEGEELLVMR	ICPL (N-term); Oxidation (M)
		B7J562													TRUE	10485	1366.700132	683.853704	0.128992	2	929.07837152	49.22	1	38.7	8488764.67174987	6224652.07048811	1.36373319755432	8488764.67174987	6224652.07048811	0.733281261901793	TAGGIIIPDTAK	ICPL (K); ICPL (N-term)
		B7J562													TRUE	9423	1366.700132	683.853704	0.162592	2	838.21876642	70.23	1	231.9	69242683.5999514	70235959.6312167	0.98585801295404	69242683.5999514	70235959.6312167	1.01434485175364	TAGGIIIPDTAK	ICPL (K); ICPL (N-term)
		B7J562													TRUE	9422	1378.7404	689.873838	0.099124	2	838.20587469	86.15	1	265.7	70235959.6312167	69242683.5999514	0.98585801295404	70235959.6312167	69242683.5999514	1.01434485175364	TAGGIIIPDTAK	ICPL:13C(6) (K); ICPL:13C(6) (N-term)
		B7J562													TRUE	10483	1378.7404	689.873838	0.156124	2	928.88062965	47.92	1	25.8	6224652.07048811	8488764.67174987	1.36373319755432	6224652.07048811	8488764.67174987	0.733281261901793	TAGGIIIPDTAK	ICPL:13C(6) (K); ICPL:13C(6) (N-term)
TRUE	Sulfite reductase [NADPH] hemoprotein beta-component	B7JAM6	453.952	22.0249	23	16	0.24	0.02	16	4.56	0.36	119394799	1609.6		TRUE	12432	860.472013	430.7396445	0.038911	2	1100.09325093	33.02	1	101.2	49485625.1407175	6450618.45176471	0.130353379055467	49485625.1407175	6450618.45176471	7.67145437460801	LNALYR	ICPL:13C(6) (N-term)
		B7JAM6													TRUE	11394	860.472013	430.7396445	0.041711	2	1010.40220994	33.85	1	46.1	7386714.54580409	1863986.57596467	0.252343117417943	7386714.54580409	1863986.57596467	3.96285823141256	LNALYR	ICPL:13C(6) (N-term)
		B7JAM6													TRUE	19374	894.431547	447.7194115	0.041177	2	1715.65641897	29.54	1	60.7	10367799.5192982	45085703.4047539	0.229957586027261	10367799.5192982	45085703.4047539	4.34862801126053	ALSDVER	ICPL (N-term)
		B7JAM6													TRUE	19368	900.451688	450.729482	0.110036	2	1715.28126858	29.16	1	152.5	45085703.4047539	10367799.5192982	0.229957586027261	45085703.4047539	10367799.5192982	4.34862801126053	ALSDVER	ICPL:13C(6) (N-term)
		B7JAM6													TRUE	4075	972.510541	486.7589085	0.097183	2	393.03354456	33	1	59.2	5594056.50282609	1904112.28023246	0.340381309926081	5594056.50282609	1904112.28023246	2.93788163697109	LHHGEIR	ICPL:13C(6) (N-term)
		B7JAM6													TRUE	21366	992.489133	496.7482045	-0.001209	2	1891.24961282	56.91	1	83.5	35436640.5067377	6194081.50166504	0.174793135384471	35436640.5067377	6194081.50166504	5.72104847138546	TYGNASLR	ICPL:13C(6) (N-term)
		B7JAM6													TRUE	17706	1006.613935	503.8106055	0.333989	2	1560.63383109	45.18	1	14.9	2443785.74653327	650709.59971455	0.266271133071973	2443785.74653327	650709.59971455	3.75557045355608	LLNLAPVR	ICPL:13C(6) (N-term)
		B7JAM6													TRUE	15838	1133.608533	567.3079045	0.291791	2	1386.84668294	40.62	1	51.4	7450854.06350686	1425829.23806233	0.191364536992587	7450854.06350686	1425829.23806233	5.22562861288524	YLPVFLDR	ICPL:13C(6) (N-term)
		B7JAM6													TRUE	19137	1315.612104	658.30969	1.15402	2	1701.44789364	30.64	1	72.7	4635719.65853658	874810.354366875	0.188710797633314	4635719.65853658	874810.354366875	5.29911384267003	SHNKPDTYSR	ICPL:13C(6) (K)
		B7JAM6													TRUE	766	1378.691923	689.8495995	0.203201	2	77.55110773	66.93	1	177.9	12953022.4289177	2498822.94550301	0.192914276124804	12953022.4289177	2498822.94550301	5.18364954677103	LEPLYQFMAR	ICPL:13C(6) (N-term)
		B7JAM6													TRUE	12651	1389.622236	695.314756	0.192288	2	1112.32231707	73.78	1	40.6	9587008.96311365	51334035.7136431	0.186757359514707	9587008.96311365	51334035.7136431	5.35454132891213	WAGETFGDFVR	ICPL (N-term)
		B7JAM6													TRUE	627	1394.686841	697.8470585	0.152083	2	67.03063252	81.74	1	44.1	2988506.97386536	701371.591434641	0.234689628489467	2988506.97386536	701371.591434641	4.26094670836671	LEPLYQFMAR	ICPL:13C(6) (N-term); Oxidation (M)
		B7JAM6													TRUE	12648	1395.642377	698.3248265	0.152747	2	1112.17829198	81.88	1	103.7	51334035.7136431	9587008.96311365	0.186757359514707	51334035.7136431	9587008.96311365	5.35454132891213	WAGETFGDFVR	ICPL:13C(6) (N-term)
		B7JAM6													TRUE	13695	1395.642377	698.3248265	0.154547	2	1202.36436149	65.3	1	55.5	8456653.13542256	1307585.35913078	0.154622087271579	8456653.13542256	1307585.35913078	6.46738132724592	WAGETFGDFVR	ICPL:13C(6) (N-term)
		B7JAM6													TRUE	20230	1426.653699	713.8304875	1.122625	2	1795.75195713	30.71	1	59.8	23461489.69892	7377364.39474179	0.314445693321912	23461489.69892	7377364.39474179	3.18019938335188	SHNKPDTYSR	ICPL:13C(6) (K); ICPL:13C(6) (N-term)
		B7JAM6													TRUE	20231	1426.653699	476.222750333333	1.157849	3	1795.8545406	32.24	1	52.5	23461489.69892	7377364.39474179	0.314445693321912	23461489.69892	7377364.39474179	3.18019938335188	SHNKPDTYSR	ICPL:13C(6) (K); ICPL:13C(6) (N-term)
		B7JAM6													TRUE	12657	1520.747541	760.8774085	0.108983	2	1112.72582533	37.29	1	39.2	28439474.3444035		0.01	28439474.3444035		100	APGLYDLYLGGDR	ICPL:13C(6) (N-term)
		B7JAM6													TRUE	13692	1520.747541	760.8774085	0.175383	2	1202.0929279	52.97	1	43.3	5657836.98314921	2106760.44497073	0.372361460969151	5657836.98314921	2106760.44497073	2.68556256438914	APGLYDLYLGGDR	ICPL:13C(6) (N-term)
		B7JAM6													TRUE	15932	1800.949018	900.978147	1.142506	2	1394.26728294	79.94	1	30.5	10544020.0464477	45483521.5906534	0.231820661147189	10544020.0464477	45483521.5906534	4.31367935477102	VADGDIPLLSGLDALAR	ICPL (N-term)
		B7JAM6													TRUE	15927	1806.96916	903.988218	1.093164	2	1394.13566642	75.39	1	80.6	45483521.5906534	10544020.0464477	0.231820661147189	45483521.5906534	10544020.0464477	4.31367935477102	VADGDIPLLSGLDALAR	ICPL:13C(6) (N-term)
		B7JAM6													TRUE	1767	2005.096097	669.036883	0.362151	3	170.63708095	27.58	1	39.4	32504958.7175301	13168775.4934121	0.405131278825779	32504958.7175301	13168775.4934121	2.46833570317841	LPGGVLSGAQWLALGDIAR	ICPL:13C(6) (N-term)
TRUE	Ketol-acid reductoisomerase	B7J643	440.295	33.7278	25	11	0.45	0.02	11	2.26	0.08	96299399	1411.1		TRUE	3374	826.40936	413.708318	0.041764	2	323.19840469	27.47	1	48.2	15631112.2226822	35855670.264874	0.435945336043412	15631112.2226822	35855670.264874	2.29386557745033	AGLEVK	ICPL (K); ICPL (N-term)
		B7J643													TRUE	3370	826.40936	826.40936	0.05954	1	322.9780303	24.79	1	1.5	15631112.2226822	35855670.264874	0.435945336043412	15631112.2226822	35855670.264874	2.29386557745033	AGLEVK	ICPL (K); ICPL (N-term)
		B7J643													TRUE	3372	838.449628	419.728452	0.010096	2	323.16047989	35.04	1	117.2	35855670.264874	15631112.2226822	0.435945336043412	35855670.264874	15631112.2226822	2.29386557745033	AGLEVK	ICPL:13C(6) (K); ICPL:13C(6) (N-term)
		B7J643													TRUE	3371	838.449628	838.449628	0.032872	1	323.06298016	26.88	1	109.1	35855670.264874	15631112.2226822	0.435945336043412	35855670.264874	15631112.2226822	2.29386557745033	AGLEVK	ICPL:13C(6) (K); ICPL:13C(6) (N-term)
		B7J643													TRUE	3009	840.447492	420.727384	0.054432	2	303.74323883	53.91	1	91.1	11352622.3816675	25500668.8144091	0.445189201282938	11352622.3816675	25500668.8144091	2.24623597589119	GPGHLVR	ICPL (N-term)
		B7J643													TRUE	3006	846.467634	423.737455	0.03189	2	303.64132149	51.09	1	130.7	25500668.8144091	11352622.3816675	0.445189201282938	25500668.8144091	11352622.3816675	2.24623597589119	GPGHLVR	ICPL:13C(6) (N-term)
		B7J643													TRUE	19453	1060.440916	530.724096	0.082408	2	1719.90300992	38.85	1	88	10559996.9617066	4016756.80032108	0.380374806440468	10559996.9617066	4016756.80032108	2.6289858925147	DSSSWEK	ICPL:13C(6) (K); ICPL:13C(6) (N-term)
		B7J643													TRUE	7225	1077.494276	359.836276	-0.389028	3	659.70845084	20.63	1	9	1165975.42221489		0.01	1165975.42221489		100	KDSSSWEK	ICPL:13C(6) (K)
		B7J643													TRUE	9313	1084.542173	542.7747245	0.232151	2	830.55611683	52.6	1	43.6	7386767.75361888	18460491.9345697	0.400139269300089	7386767.75361888	18460491.9345697	2.49912986983049	AGVIETSFR	ICPL (N-term)
		B7J643													TRUE	9312	1090.562314	545.784795	0.10081	2	830.6510587	49.9	1	59.5	18460491.9345697	7386767.75361888	0.400139269300089	18460491.9345697	7386767.75361888	2.49912986983049	AGVIETSFR	ICPL:13C(6) (N-term)
		B7J643													TRUE	14325	1339.5865	670.296888	0.194024	2	1267.88242265	37.01	1	25.4	969108.367155022	487003.070492007	0.502526948479132	969108.367155022	487003.070492007	1.98994303295861	SMMTWIGQSR	ICPL:13C(6) (N-term); 2 Oxidation (M)
		B7J643													TRUE	11725	1458.672208	729.839742	0.153916	2	1032.58675982	61.58	1	74.7	18308904.7795095	36580171.2448635	0.500514463340036	18308904.7795095	36580171.2448635	1.99794426184369	ADLDCFLVAPK	ICPL (K); ICPL (N-term)
		B7J643													TRUE	11721	1470.712476	735.859876	0.087248	2	1032.3106686	65.96	1	43.8	36580171.2448635	18308904.7795095	0.500514463340036	36580171.2448635	18308904.7795095	1.99794426184369	ADLDCFLVAPK	ICPL:13C(6) (K); ICPL:13C(6) (N-term)
		B7J643													TRUE	11737	1470.712476	735.859876	0.120848	2	1033.54332622	53.84	1	51.9	36580171.2448635	18308904.7795095	0.500514463340036	36580171.2448635	18308904.7795095	1.99794426184369	ADLDCFLVAPK	ICPL:13C(6) (K); ICPL:13C(6) (N-term)
		B7J643													TRUE	13643	1494.769926	747.888601	1.099198	2	1198.8969199	95.05	1	68.8	15389489.1232557	30031304.7860426	0.51244823469702	15389489.1232557	30031304.7860426	1.95141661594608	ILTEIQNGQFAR	ICPL (N-term)
		B7J643													TRUE	9413	1494.769926	747.888601	1.100398	2	837.3662587	29.82	1	34.6	3206650.99737993	8548563.90971524	0.375109905154438	3206650.99737993	8548563.90971524	2.665885347891	ILTEIQNGQFAR	ICPL (N-term)
		B7J643													TRUE	13639	1500.790067	750.8986715	0.144857	2	1198.61381163	74.67	1	101.7	30031304.7860426	15389489.1232557	0.51244823469702	30031304.7860426	15389489.1232557	1.95141661594608	ILTEIQNGQFAR	ICPL:13C(6) (N-term)
		B7J643													TRUE	9411	1500.790067	750.8986715	1.089257	2	837.19728322	27.47	1	72.5	8548563.90971524	3206650.99737993	0.375109905154438	8548563.90971524	3206650.99737993	2.665885347891	ILTEIQNGQFAR	ICPL:13C(6) (N-term)
		B7J643													TRUE	7694	1557.809873	779.4085745	0.161251	2	686.57542632	67.88	1	57.7	53852447.2877823	23734879.6761656	0.440739109762805	53852447.2877823	23734879.6761656	2.26891595923533	IGAEHPIEVVGSK	ICPL:13C(6) (K); ICPL:13C(6) (N-term)
		B7J643													TRUE	7696	1557.809873	519.941475	0.170175	3	686.6903927	40.65	1	27.7	53852447.2877823	23734879.6761656	0.440739109762805	53852447.2877823	23734879.6761656	2.26891595923533	IGAEHPIEVVGSK	ICPL:13C(6) (K); ICPL:13C(6) (N-term)
		B7J643													TRUE	6606	1700.785764	850.89652	0.11196	2	594.83215837	63.08	1	64.6	23552044.4410987	9460183.51871582	0.401671436310966	23552044.4410987	9460183.51871582	2.48959699296572	YSISNTAEYGDLTR	ICPL:13C(6) (N-term)
		B7J643													TRUE	2385	2071.091062	691.035204666667	0.395986	3	239.88832031	45.6	1	19.1	1496482.31786635	804494.197253587	0.537590179081179	1496482.31786635	804494.197253587	1.86015302903998	VAIIGYGSQGHAHALNLK	ICPL:13C(6) (K); ICPL:13C(6) (N-term)
TRUE	Cytochrome c-type biogenesis protein ResB	B7JAL6	428.447	21.4984	19	14	0.26	0.04	14	4.86	0.67	87279140	837.7		TRUE	6640	1089.499982	545.253629	0.208342	2	597.35419942	49.04	1	15.6	4717333.6681754	44980174.1227822	0.104875842750153	4717333.6681754	44980174.1227822	9.53508428420751	EFEGFVTR	ICPL (N-term)
		B7JAL6													TRUE	5615	1120.513685	560.7604805	0.141439	2	509.63485146	39.18	1	74.8	15396372.007042	2928965.02308667	0.190237350834795	15396372.007042	2928965.02308667	5.25659128247856	NPYEFTK	ICPL:13C(6) (K); ICPL:13C(6) (N-term)
		B7JAL6													TRUE	18241	1130.516813	565.7620445	0.064511	2	1615.66909149	62.28	1	105.4	5463068.20814085	2759791.78982274	0.50517249367493	5463068.20814085	2759791.78982274	1.97952187128281	SALQSQDDR	ICPL:13C(6) (N-term)
		B7JAL6													TRUE	13573	1129.586805	565.2970405	1.106719	2	1194.89390283	46.08	1	41.1	22086479.8851137	3209074.50747355	0.145295878934355	22086479.8851137	3209074.50747355	6.8825076618436	YVLHTFK	ICPL:13C(6) (K); ICPL:13C(6) (N-term)
		B7JAL6													TRUE	20317	1194.548109	597.7776925	0.150815	2	1800.90469899	54.73	1	40.4	14809487.5069326		0.01	14809487.5069326		100	QISGDASYSR	ICPL:13C(6) (N-term)
		B7JAL6													TRUE	14862	1245.63751	623.322393	0.201414	2	1299.61362265	45.57	1	35.9	3597363.06739445	1342522.46175883	0.37319626532198	3597363.06739445	1342522.46175883	2.67955521778128	LPGTTYMLK	ICPL:13C(6) (K); ICPL:13C(6) (N-term)
		B7JAL6													TRUE	2941	1324.696805	662.8520405	0.069319	2	300.01493002	84.53	1	20.7							LHESNGGVVVTGR
		B7JAL6													TRUE	21251	1324.696805	662.8520405	1.134719	2	1884.89515468	21.01	1	23.5							LHESNGGVVVTGR
		B7JAL6													TRUE	5445	1360.628049	680.8176625	0.191075	2	499.47839333	54.9	1	21.3	8949386.48505842	60857899.0397003	0.147053819245721	8949386.48505842	60857899.0397003	6.80023140595241	DGQSYFVQGVR	ICPL (N-term)
		B7JAL6													TRUE	5439	1366.648191	683.8277335	0.193133	2	499.27075972	61.45	1	139.6	60857899.0397003	8949386.48505842	0.147053819245721	60857899.0397003	8949386.48505842	6.80023140595241	DGQSYFVQGVR	ICPL:13C(6) (N-term)
		B7JAL6													TRUE	6501	1366.648191	683.8277335	0.225933	2	589.42404956	72.36	1	29.5	16540635.4643302	5513857.27968181	0.33335220352159	16540635.4643302	5513857.27968181	2.99983017791942	DGQSYFVQGVR	ICPL:13C(6) (N-term)
		B7JAL6													TRUE	19307	1369.653364	685.33032	1.12436	2	1711.71269363	33.07	1	13.5	8403793.30342554	2011659.71943886	0.239375201983951	8403793.30342554	2011659.71943886	4.1775421669077	SALQSQDDRK	ICPL:13C(6) (K); ICPL:13C(6) (N-term)
		B7JAL6													TRUE	7662	1417.65904	709.333158	0.220484	2	685.40256765	50.37	1	10.4	6293899.4113897	3185879.50548175	0.506185322840789	6293899.4113897	3185879.50548175	1.97556103442085	AWLSDNNPAYR	ICPL:13C(6) (N-term)
		B7JAL6													TRUE	6353	1435.738401	718.3728385	0.119723	2	581.93829117	74.95	1	56.3	25900044.5514379	4262905.00128536	0.1645906435728	25900044.5514379	4262905.00128536	6.0756795057897	LHESNGGVVVTGR	ICPL:13C(6) (N-term)
		B7JAL6													TRUE	21618	1486.690427	743.8488515	1.125497	2	1905.38434562	30.44	1	51.3	11957087.7864074	3969597.37557387	0.331986972621079	11957087.7864074	3969597.37557387	3.0121663874485	EPDLAVGSGYDPR	ICPL:13C(6) (N-term)
		B7JAL6													TRUE	2582	1545.753995	773.3806355	-0.644671	2	254.06221204	21.6	1	9.8	686067.901153058	216029.066597765	0.314880008574501	686067.901153058	216029.066597765	3.17581292164948	KAWLSDNNPAYR	ICPL:13C(6) (K)
		B7JAL6													TRUE	3249	1644.791929	822.8996025	0.138595	2	315.96825536	93	1	9.8	39382538.4946313	5937105.79523812	0.150754776664472	39382538.4946313	5937105.79523812	6.63328898841895	ASNDGTEVIIGGASSR	ICPL:13C(6) (N-term)
		B7JAL6													TRUE	720	1929.995359	644.003303666667	0.239389	3	74.04514933	29.31	1	42.2	5780202.24179692	903910.574630274	0.156380440825072	5780202.24179692	903910.574630274	6.39466160041462	AYPVPFVVTLTGFDHR	ICPL:13C(6) (N-term)
TRUE	Putative uncharacterized protein	B7J7M4	425.835	46.0526	17	7	0.41	0.01	7	2.47	0.09	53273510	1756.3		TRUE	18331	840.392515	420.6998955	1.081809	2	1621.33875817	31.77	1	19.8	7423410.20589717	3089372.23430333	0.416166175465977	7423410.20589717	3089372.23430333	2.4028862962741	VQEDK	ICPL:13C(6) (K); ICPL:13C(6) (N-term)
		B7J7M4													TRUE	5756	1037.436307	519.2217915	0.044417	2	519.80112612	46.37	1	57.1	16511797.4587297	40688187.7913792	0.4058130468575	16511797.4587297	40688187.7913792	2.46418888634487	DFEAFAK	ICPL (K); ICPL (N-term)
		B7J7M4													TRUE	5746	1049.476575	525.2419255	0.020549	2	519.03111013	46.07	1	627	40688187.7913792	16511797.4587297	0.4058130468575	40688187.7913792	16511797.4587297	2.46418888634487	DFEAFAK	ICPL:13C(6) (K); ICPL:13C(6) (N-term)
		B7J7M4													TRUE	6799	1049.476575	525.2419255	0.198949	2	609.20074983	46.11	1	78.2	8821652.09828346	3009681.04070302	0.341169772642547	8821652.09828346	3009681.04070302	2.93109202569281	DFEAFAK	ICPL:13C(6) (K); ICPL:13C(6) (N-term)
		B7J7M4													TRUE	4470	1166.584058	583.795667	0.116866	2	415.5336363	54.67	1	154	47501321.0433843	114134155.834289	0.416188481845445	47501321.0433843	114134155.834289	2.40275750920795	VVATDPGAVK	ICPL (K); ICPL (N-term)
		B7J7M4													TRUE	4481	1178.624326	589.815801	0.101998	2	416.27545283	62.56	1	54.9	114134155.834289	47501321.0433843	0.416188481845445	114134155.834289	47501321.0433843	2.40275750920795	VVATDPGAVK	ICPL:13C(6) (K); ICPL:13C(6) (N-term)
		B7J7M4													TRUE	4466	1178.624326	589.815801	0.151798	2	415.17978616	66.35	1	102.9	114134155.834289	47501321.0433843	0.416188481845445	114134155.834289	47501321.0433843	2.40275750920795	VVATDPGAVK	ICPL:13C(6) (K); ICPL:13C(6) (N-term)
		B7J7M4													TRUE	11615	1425.737241	713.3722585	0.130483	2	1024.35697635	53.61	1	150.7	25055728.8301172	52191067.5790285	0.480076955547566	25055728.8301172	52191067.5790285	2.08299937842136	ALGELTSGQVLK	ICPL (K); ICPL (N-term)
		B7J7M4													TRUE	12685	1425.737241	713.3722585	0.131483	2	1114.54759227	47.83	1	32.4	5386041.62972782	13094760.4186958	0.411312727954761	5386041.62972782	13094760.4186958	2.43124010524174	ALGELTSGQVLK	ICPL (K); ICPL (N-term)
		B7J7M4													TRUE	12682	1437.777509	719.3923925	0.121015	2	1114.41054212	57.95	1	51.8	13094760.4186958	5386041.62972782	0.411312727954761	13094760.4186958	5386041.62972782	2.43124010524174	ALGELTSGQVLK	ICPL:13C(6) (K); ICPL:13C(6) (N-term)
		B7J7M4													TRUE	11613	1437.777509	719.3923925	0.156815	2	1024.1818766	58.62	1	135.1	52191067.5790285	25055728.8301172	0.480076955547566	52191067.5790285	25055728.8301172	2.08299937842136	ALGELTSGQVLK	ICPL:13C(6) (K); ICPL:13C(6) (N-term)
		B7J7M4													TRUE	12697	1658.853666	829.930471	0.126858	2	1115.34958426	75.1	1	34.7	7672805.52348218	19676911.5809017	0.389939523381778	7672805.52348218	19676911.5809017	2.56450023667114	KALGELTSGQVLK	2 ICPL (K); ICPL (N-term)
		B7J7M4													TRUE	12693	1676.91406	838.960668	0.086264	2	1115.07490053	93.44	1	64.3	19676911.5809017	7672805.52348218	0.389939523381778	19676911.5809017	7672805.52348218	2.56450023667114	KALGELTSGQVLK	2 ICPL:13C(6) (K); ICPL:13C(6) (N-term)
		B7J7M4													TRUE	12696	1676.91406	559.642870666667	0.117688	3	1115.45299227	49.04	1	30.4	19676911.5809017	7672805.52348218	0.389939523381778	19676911.5809017	7672805.52348218	2.56450023667114	KALGELTSGQVLK	2 ICPL:13C(6) (K); ICPL:13C(6) (N-term)
TRUE	Imidazole glycerol phosphate synthase subunit HisF	B7JA19	423.087	35.9684	13	7	0.29	0.04	7	3.96	0.54	38124215	477.7		TRUE	12448	1000.567014	500.787145	0.08371	2	1100.86644187	50.8	1	46.8	8341962.30371896	3060224.86005778	0.366847121653078	8341962.30371896	3060224.86005778	2.72593116035319	GVQFVALR	ICPL:13C(6) (N-term)
		B7JA19													TRUE	10611	1111.578214	556.292745	0.16631	2	937.808755	60.89	1	24.6	3078046.63706185	11265774.254631	0.273221046995199	3078046.63706185	11265774.254631	3.66004014331141	TLLLAGADK	ICPL (K); ICPL (N-term)
		B7JA19													TRUE	10604	1123.618482	562.312879	0.118242	2	937.34712193	90.82	1	38.9	11265774.254631	3078046.63706185	0.273221046995199	11265774.254631	3078046.63706185	3.66004014331141	TLLLAGADK	ICPL:13C(6) (K); ICPL:13C(6) (N-term)
		B7JA19													TRUE	19528	1222.577756	611.792516	1.147168	2	1724.65036031	50.52	1	23.7	2380314.55178503		0.01	2380314.55178503		100	DAGDPVEVAK	ICPL:13C(6) (K); ICPL:13C(6) (N-term)
		B7JA19													TRUE	6376	1281.643033	641.3251545	1.174091	2	583.08326662	74.39	1	57.5	19647298.1340307	4353553.44478217	0.221585350569983	19647298.1340307	4353553.44478217	4.51293371799039	HFVEGIQQGR	ICPL:13C(6) (N-term)
		B7JA19													TRUE	10362	1355.679807	678.3435415	0.144117	2	921.38633792	51.99	1	18.1	3779065.73032576	1929447.51537044	0.510562041799711	3779065.73032576	1929447.51537044	1.95862582434652	GTGLDAVAWAQR	ICPL:13C(6) (N-term)
		B7JA19													TRUE	11389	1399.678693	700.3429845	0.143431	2	1010.25905953	49.11	1	33.3	1702819.82243737	8571207.82978547	0.198667428938075	1702819.82243737	8571207.82978547	5.03353773361462	VIPCLDIDHGR	ICPL (N-term)
		B7JA19													TRUE	20768	1400.739316	467.584622666667	-0.562568	3	1829.3274574	27.08	1	15.6							RGTGLDAVAWAQR
		B7JA19													TRUE	13312	1835.866788	612.627113333333	0.22076	3	1179.20676096	49.36	1	92.2	6496008.94007779	1090274.86235051	0.167837648070948	6496008.94007779	1090274.86235051	5.95813878169505	RVEDHWEVFTHGGR	ICPL:13C(6) (N-term)
		B7JA19													TRUE	13315	1835.866788	459.722154	0.242584	4	1179.68733643	36.25	1	16.3	6496008.94007779	1090274.86235051	0.167837648070948	6496008.94007779	1090274.86235051	5.95813878169505	RVEDHWEVFTHGGR	ICPL:13C(6) (N-term)
		B7JA19													TRUE	1643	1846.933073	923.9701745	0.122251	2	162.96958921	105.15	1	58.8	14984339.0959136	3955286.96515809	0.263961389277205	14984339.0959136	3955286.96515809	3.78843285655626	ADAVLAASVFHFGQFR	ICPL:13C(6) (N-term)
		B7JA19													TRUE	1642	1846.933073	616.315875	0.674775	3	162.98193108	66.8	1	32.9	14984339.0959136	3955286.96515809	0.263961389277205	14984339.0959136	3955286.96515809	3.78843285655626	ADAVLAASVFHFGQFR	ICPL:13C(6) (N-term)
TRUE	50S ribosomal protein L7/L12	B7J458	416.46	34.375	19	4	0.82	0.03	4	1.23	0.05	62069224	2244.8		TRUE	5454	796.439069	398.7231725	0.017455	2	500.0695096	23.93	1	75.7	40428571.0483796	32546705.5092864	0.805042193312714	40428571.0483796	32546705.5092864	1.24217091763233	VNTIK	ICPL:13C(6) (K); ICPL:13C(6) (N-term)
		B7J458													TRUE	5451	796.439069	796.439069	0.072731	1	499.85682638	24.78	1	59.2	40428571.0483796	32546705.5092864	0.805042193312714	40428571.0483796	32546705.5092864	1.24217091763233	VNTIK	ICPL:13C(6) (K); ICPL:13C(6) (N-term)
		B7J458													TRUE	18386	943.415555	943.415555	-0.013455	1	1625.06419176	34.02	1	41.7	13142710.9979567	17406921.7459032	0.755027867063855	13142710.9979567	17406921.7459032	1.32445442562112	AEAESVK	ICPL (K); ICPL (N-term)
		B7J458													TRUE	18373	943.415555	472.2114155	1.043969	2	1624.35189149	41.29	1	49.9	13142710.9979567	17406921.7459032	0.755027867063855	13142710.9979567	17406921.7459032	1.32445442562112	AEAESVK	ICPL (K); ICPL (N-term)
		B7J458													TRUE	18382	955.455823	955.455823	-0.000423	1	1624.70606643	29.73	1	82.8	17406921.7459032	13142710.9979567	0.755027867063855	17406921.7459032	13142710.9979567	1.32445442562112	AEAESVK	ICPL:13C(6) (K); ICPL:13C(6) (N-term)
		B7J458													TRUE	18380	955.455823	478.2315495	0.020501	2	1624.53811656	50.43	1	205	17406921.7459032	13142710.9979567	0.755027867063855	17406921.7459032	13142710.9979567	1.32445442562112	AEAESVK	ICPL:13C(6) (K); ICPL:13C(6) (N-term)
		B7J458													TRUE	13698	982.535627	982.535627	0.034973	1	1202.66279457	51.28	1	182.9	90422322.5293569	97528852.7684742	0.927134073277908	90422322.5293569	97528852.7684742	1.0785926532335	AITGLGLK	ICPL (K); ICPL (N-term)
		B7J458													TRUE	13697	982.535627	491.7714515	0.069097	2	1202.52437803	55.46	1	320.4	90422322.5293569	97528852.7684742	0.927134073277908	90422322.5293569	97528852.7684742	1.0785926532335	AITGLGLK	ICPL (K); ICPL (N-term)
		B7J458													TRUE	13696	994.575895	994.575895	0.014805	1	1202.53533642	48.9	1	204	97528852.7684742	90422322.5293569	0.927134073277908	97528852.7684742	90422322.5293569	1.0785926532335	AITGLGLK	ICPL:13C(6) (K); ICPL:13C(6) (N-term)
		B7J458													TRUE	13694	994.575895	497.7915855	0.038029	2	1202.51364468	50.59	1	509.7	97528852.7684742	90422322.5293569	0.927134073277908	97528852.7684742	90422322.5293569	1.0785926532335	AITGLGLK	ICPL:13C(6) (K); ICPL:13C(6) (N-term)
		B7J458													TRUE	4572	1453.711042	727.359159	0.151482	2	421.78789497	62.48	1	124.3	41029093.3411761	52609707.945001	0.7798768505628	41029093.3411761	52609707.945001	1.28225372926296	DLVDGAPKPVK	2 ICPL (K); ICPL (N-term)
		B7J458													TRUE	4573	1453.711042	485.241864666667	0.151606	3	421.79954457	54.54	1	71.4	41029093.3411761	52609707.945001	0.7798768505628	41029093.3411761	52609707.945001	1.28225372926296	DLVDGAPKPVK	2 ICPL (K); ICPL (N-term)
		B7J458													TRUE	5645	1471.771436	736.389356	0.114488	2	511.51071012	37.55	1	26.1	3367993.52775432		0.01	3367993.52775432		100	DLVDGAPKPVK	2 ICPL:13C(6) (K); ICPL:13C(6) (N-term)
		B7J458													TRUE	4568	1471.771436	736.389356	0.165488	2	421.5592779	65.11	1	131.7	52609707.945001	41029093.3411761	0.7798768505628	52609707.945001	41029093.3411761	1.28225372926296	DLVDGAPKPVK	2 ICPL:13C(6) (K); ICPL:13C(6) (N-term)
		B7J458													TRUE	3584	1550.78877	775.898023	0.174954	2	338.57658015	104.84	1	21.1	1941028.67288315		0.01	1941028.67288315		100	AQLVEAGAEAEIK	ICPL:13C(6) (K); ICPL:13C(6) (N-term)
TRUE	Pyridine nucleotide-disulfide oxidoreductase	B7J7M0	391.755	24.5014	16	9	1.18	0.12	9	0.92	0.09	61627546	909.1		TRUE	4160	849.400205	425.2037405	-0.036881	2	397.79357763	29.08	1	90.4	20248517.2757562	21232359.7132667	0.953663066621096	20248517.2757562	21232359.7132667	1.0485883694155	HGFIDR	ICPL (N-term)
		B7J7M0													TRUE	19507	971.446882	971.446882	0.009718	1	1723.22014378	25.68	1	26.5	11883542.2992827	9236804.07635249	1.28654263975418	11883542.2992827	9236804.07635249	0.777276997357096	GEDTLVK	ICPL (K); ICPL (N-term)
		B7J7M0													TRUE	19503	971.446882	486.227079	1.158242	2	1723.05090217	40.43	1	51	11883542.2992827	9236804.07635249	1.28654263975418	11883542.2992827	9236804.07635249	0.777276997357096	GEDTLVK	ICPL (K); ICPL (N-term)
		B7J7M0													TRUE	11624	1074.525464	537.76637	0.09286	2	1025.05849314	73.91	1	21.6	2388283.93142732	2099308.86195678	1.13765247920746	2388283.93142732	2099308.86195678	0.879003050823256	TFGIGLEK	ICPL (K); ICPL (N-term)
		B7J7M0													TRUE	10574	1074.525464	537.76637	0.13966	2	935.30192992	73.71	1	27	5684547.49831521	3733507.60794997	1.52257557643937	5684547.49831521	3733507.60794997	0.656781847465697	TFGIGLEK	ICPL (K); ICPL (N-term)
		B7J7M0													TRUE	11626	1086.565732	543.786504	0.096392	2	1025.20575127	63.4	1	27.7	2099308.86195678	2388283.93142732	1.13765247920746	2099308.86195678	2388283.93142732	0.879003050823256	TFGIGLEK	ICPL:13C(6) (K); ICPL:13C(6) (N-term)
		B7J7M0													TRUE	10576	1086.565732	543.786504	0.157992	2	935.28001312	73.62	1	24	3733507.60794997	5684547.49831521	1.52257557643937	3733507.60794997	5684547.49831521	0.656781847465697	TFGIGLEK	ICPL:13C(6) (K); ICPL:13C(6) (N-term)
		B7J7M0													TRUE	5706	1182.510206	591.758741	0.159718	2	515.7925848	71.43	1	85.8	12870738.1166819	10151612.3595709	1.26785161418692	12870738.1166819	10151612.3595709	0.788735833760253	TFGLYEDK	ICPL (K); ICPL (N-term)
		B7J7M0													TRUE	5704	1194.550474	597.778875	0.13485	2	515.64561839	71.29	1	32.4	10151612.3595709	12870738.1166819	1.26785161418692	10151612.3595709	12870738.1166819	0.788735833760253	TFGLYEDK	ICPL:13C(6) (K); ICPL:13C(6) (N-term)
		B7J7M0													TRUE	9492	1196.573469	598.7903725	0.135255	2	843.3987499	23.85	2	173	47350778.9088276		100	47350778.9088276		0.01	LVPSGEWAK	ICPL (K); ICPL (N-term)
		B7J7M0													TRUE	5582	1302.61131	651.809293	0.124014	2	507.60552613	68.17	1	88.5	36073463.5001468	20678564.9964588	1.7444858241529	36073463.5001468	20678564.9964588	0.573234810025233	AVADLYGQQK	ICPL (K); ICPL (N-term)
		B7J7M0													TRUE	5579	1314.651578	657.829427	0.136546	2	507.45016827	81.37	1	76.6	20678564.9964588	36073463.5001468	1.7444858241529	20678564.9964588	36073463.5001468	0.573234810025233	AVADLYGQQK	ICPL:13C(6) (K); ICPL:13C(6) (N-term)
		B7J7M0													TRUE	20242	1466.660184	733.83373	-0.91206	2	1796.66516566	27.36	1	22.1	17222011.0941902	12880378.6383507	0.747902121761837	17222011.0941902	12880378.6383507	1.33707335612887	AEQYTNSQGTTR	ICPL:13C(6) (N-term)
		B7J7M0													TRUE	12797	1713.848234	857.427755	0.03609	2	1122.07120879	62.52	1	18.2	3726698.2370772	2994090.76220288	1.24468445784032	3726698.2370772	2994090.76220288	0.803416475317065	EDILGGAPIISGYAK	ICPL (K); ICPL (N-term)
		B7J7M0													TRUE	18550	1814.897809	605.637453666667	-0.437861	3	1637.49688297	24.03	1	15.1	368420.96686927	254447.683097957	0.69064387203632	368420.96686927	254447.683097957	1.4479242348905	SQEEFKTKFVK	3 ICPL:13C(6) (K); ICPL:13C(6) (N-term)
TRUE	Periplasmic solute-binding protein, putative	B7J3E4	363.629	31.25	24	13	0.2	0.02	13	5.54	0.51	133657757	1441.6		TRUE	3188	859.440381	430.2238285	0.081343	2	313.05313857	22.29	1	61.3	61570648.4061793	9428650.69669603	0.153135478361306	61570648.4061793	9428650.69669603	6.53016538493199	EYPALR	ICPL:13C(6) (N-term)
		B7J3E4													TRUE	12656	901.456647	901.456647	0.042953	1	1112.54189198	34.08	1	4.8	5934374.67439526	31705973.3975446	0.187168979169548	5934374.67439526	31705973.3975446	5.34276568925531	VNAFIK	ICPL (K); ICPL (N-term)
		B7J3E4													TRUE	12647	913.496915	913.496915	0.032185	1	1112.05711707	27.72	1	47.8	31705973.3975446	5934374.67439526	0.187168979169548	31705973.3975446	5934374.67439526	5.34276568925531	VNAFIK	ICPL:13C(6) (K); ICPL:13C(6) (N-term)
		B7J3E4													TRUE	12645	913.496915	457.2520955	0.032209	2	1112.04489199	41.34	1	59.2	31705973.3975446	5934374.67439526	0.187168979169548	31705973.3975446	5934374.67439526	5.34276568925531	VNAFIK	ICPL:13C(6) (K); ICPL:13C(6) (N-term)
		B7J3E4													TRUE	21546	964.492551	482.7499135	-0.921827	2	1901.09670402	34.99	1	28.4	28764224.139918	5453722.30753126	0.189600883409985	28764224.139918	5453722.30753126	5.27423702893643	AGGPALEK	ICPL:13C(6) (K); ICPL:13C(6) (N-term)
		B7J3E4													TRUE	21552	964.492551	482.7499135	1.055173	2	1901.56403734	48.91	1	25.5	28764224.139918	5453722.30753126	0.189600883409985	28764224.139918	5453722.30753126	5.27423702893643	AGGPALEK	ICPL:13C(6) (K); ICPL:13C(6) (N-term)
		B7J3E4													TRUE	14941	1131.5258	566.266538	1.138724	2	1305.19788932	21.31	1	28.7	19197168.1886138	95238306.2170719	0.201569819447006	19197168.1886138	95238306.2170719	4.96106015644325	DWVNFLK	ICPL (K); ICPL (N-term)
		B7J3E4													TRUE	14939	1143.566068	572.286672	0.152256	2	1305.09358904	43.11	1	181.8	95238306.2170719	19197168.1886138	0.201569819447006	95238306.2170719	19197168.1886138	4.96106015644325	DWVNFLK	ICPL:13C(6) (K); ICPL:13C(6) (N-term)
		B7J3E4													TRUE	8947	1427.750211	714.3787435	0.164513	2	808.7935835	69	1	29.4							NGETILTHIHHR
		B7J3E4													TRUE	8945	1427.750211	476.588254333333	0.181637	3	809.02835843	55.93	1	66.7							NGETILTHIHHR
		B7J3E4													TRUE	13623	1538.751569	769.8794225	0.119755	2	1197.71420308	73.05	1	132.7	25828967.1824481	6720849.49582773	0.260205893962142	25828967.1824481	6720849.49582773	3.84311048751836	LSMPNPAWEGVAR	ICPL:13C(6) (N-term)
		B7J3E4													TRUE	12160	1538.791807	513.602119666667	0.080341	3	1084.66177572	50.48	1	29	1885902.06393013	448234.850158681	0.237676631640448	1885902.06393013	448234.850158681	4.20739722326922	NGETILTHIHHR	ICPL:13C(6) (N-term)
		B7J3E4													TRUE	11120	1538.791807	513.602119666667	0.144241	3	994.66995981	37.64	1	26.4	17152299.9398527	3166064.26326746	0.184585406876616	17152299.9398527	3166064.26326746	5.41754636469414	NGETILTHIHHR	ICPL:13C(6) (N-term)
		B7J3E4													TRUE	11122	1538.791807	769.8995415	0.145717	2	994.76305155	65.08	1	83.3	17152299.9398527	3166064.26326746	0.184585406876616	17152299.9398527	3166064.26326746	5.41754636469414	NGETILTHIHHR	ICPL:13C(6) (N-term)
		B7J3E4													TRUE	11177	1538.791807	769.8995415	0.953517	2	997.95440141	25.86	1	70.9	16582678.8014942	4472379.89085175	0.269701894632895	16582678.8014942	4472379.89085175	3.70779746045592	NGETILTHIHHR	ICPL:13C(6) (N-term)
		B7J3E4													TRUE	11173	1538.791807	513.602119666667	1.025041	3	997.80113474	53.96	1	138	16582678.8014942	4472379.89085175	0.269701894632895	16582678.8014942	4472379.89085175	3.70779746045592	NGETILTHIHHR	ICPL:13C(6) (N-term)
		B7J3E4													TRUE	10118	1538.791807	513.602119666667	1.085641	3	907.09185473	50.86	1	74.3	8215642.37546936	1387011.97506832	0.168825748697353	8215642.37546936	1387011.97506832	5.9232670828705	NGETILTHIHHR	ICPL:13C(6) (N-term)
		B7J3E4													TRUE	13488	1554.746488	777.876882	0.119236	2	1190.05989483	52.82	1	54.2	7876375.00769973	602308.992872864	0.0764703295975703	7876375.00769973	602308.992872864	13.0769673056538	LSMPNPAWEGVAR	ICPL:13C(6) (N-term); Oxidation (M)
		B7J3E4													TRUE	15960	1741.960203	871.4837395	1.122521	2	1395.61604935	51.14	1	88.6	39209469.2035996	9651616.77122556	0.24615525196499	39209469.2035996	9651616.77122556	4.06247679875719	IYYETLPPGILIK	ICPL:13C(6) (K); ICPL:13C(6) (N-term)
		B7J3E4													TRUE	12589	2439.249402	813.754651333333	0.209246	3	1108.707484	41.45	1	61.2	10639652.3552205	2719877.27165839	0.255635915615592	10639652.3552205	2719877.27165839	3.91181339911459	SEAIFQEQAGHPIANVPIPAK	ICPL:13C(6) (K); ICPL:13C(6) (N-term)
		B7J3E4													TRUE	17881	2517.237195	839.750582333333	1.143953	3	1571.48234843	50.54	1	60.4	12144862.0552265	1888627.22258679	0.155508330518586	12144862.0552265	1888627.22258679	6.43052366818691	SPTALQIFEHYGFKPYTGK	2 ICPL:13C(6) (K); ICPL:13C(6) (N-term)
TRUE	PspA/IM30 family	B7J498	361.965	49.5902	32	15	0.17	0.02	15	6.51	0.6	172229184	1881		TRUE	10447	753.43324	377.220258	0.037284	2	926.66934647	28.44	1	59.5	15458454.6689465	3006803.48458637	0.194508671725547	15458454.6689465	3006803.48458637	5.14115895774049	IASLK	ICPL:13C(6) (K); ICPL:13C(6) (N-term)
		B7J498													TRUE	10446	753.43324	753.43324	0.06606	1	926.68147979	28.8	1	46.1	15458454.6689465	3006803.48458637	0.194508671725547	15458454.6689465	3006803.48458637	5.14115895774049	IASLK	ICPL:13C(6) (K); ICPL:13C(6) (N-term)
		B7J498													TRUE	5286	811.451627	406.2294515	0.055897	2	491.00811813	36.38	1	99.5	27173770.3854112	3506476.36858827	0.129039007795208	27173770.3854112	3506476.36858827	7.74959461550615	VALGANR	ICPL:13C(6) (N-term)
		B7J498													TRUE	4221	811.451627	406.2294515	0.073697	2	401.32729443	28.26	1	10.8	9603846.54404826	2006620.85859069	0.208939287960014	9603846.54404826	2006620.85859069	4.7860792949164	VALGANR	ICPL:13C(6) (N-term)
		B7J498													TRUE	19598	843.430219	843.430219	0.416281	1	1730.08645204	26.7	1	3.3	622181.782533154	216792.846262273	0.348439720268925	622181.782533154	216792.846262273	2.86993686950559	QSELQK	ICPL:13C(6) (K)
		B7J498													TRUE	18390	871.425138	871.425138	0.024262	1	1625.32204137	22.97	1	115.9	24861219.2095168	3356023.86186458	0.134990316990564	24861219.2095168	3356023.86186458	7.40793874919116	ELDEVR	ICPL:13C(6) (N-term)
		B7J498													TRUE	18388	871.425138	436.216207	0.093786	2	1625.3092835	31.02	1	166.3	24861219.2095168	3356023.86186458	0.134990316990564	24861219.2095168	3356023.86186458	7.40793874919116	ELDEVR	ICPL:13C(6) (N-term)
		B7J498													TRUE	21676	1077.492612	539.249944	1.110512	2	1909.29736268	43.39	1	36.3	20090486.2566573	3940017.2520709	0.196113583401462	20090486.2566573	3940017.2520709	5.09908585961081	LTDYESK	ICPL:13C(6) (K); ICPL:13C(6) (N-term)
		B7J498													TRUE	5357	1144.574537	572.7909065	0.144187	2	494.88908453	41.96	1	36	10341629.368036	69949315.6199623	0.147844611149914	10341629.368036	69949315.6199623	6.76385829839953	HLADVVTER	ICPL (N-term)
		B7J498													TRUE	4291	1150.594678	575.800977	0.125846	2	404.96800269	57.13	1	2.4	37633490.0697467	5171793.33502417	0.137425291288137	37633490.0697467	5171793.33502417	7.27668095607901	HLADVVTER	ICPL:13C(6) (N-term)
		B7J498													TRUE	5352	1150.594678	575.800977	0.167246	2	494.64623492	66.86	1	182.1	69949315.6199623	10341629.368036	0.147844611149914	69949315.6199623	10341629.368036	6.76385829839953	HLADVVTER	ICPL:13C(6) (N-term)
		B7J498													TRUE	4287	1154.551008	577.779142	1.155516	2	404.78228589	22.47	1	58.3	18260869.9524637	148553001.730939	0.122924947592362	18260869.9524637	148553001.730939	8.13504516037017	MIANLQDTK	ICPL (N-term); Oxidation (M)
		B7J498													TRUE	20676	1213.594297	607.3007865	0.131227	2	1822.46479926	23.6	1	15.5							HAAEILESK	ICPL (N-term); ICPL:13C(6) (K)
		B7J498													TRUE	4408	1219.614438	610.310857	0.172686	2	411.89876109	66.79	1	80.4	31214278.4370262	7005080.84742869	0.224419118371139	31214278.4370262	7005080.84742869	4.45594834904494	HAAEILESK	ICPL:13C(6) (K); ICPL:13C(6) (N-term)
		B7J498													TRUE	3339	1219.614438	610.310857	0.175486	2	321.45402177	57.27	1	48.8	35414165.4796285	8086968.77891202	0.228354068757146	35414165.4796285	8086968.77891202	4.37916436279267	HAAEILESK	ICPL:13C(6) (K); ICPL:13C(6) (N-term)
		B7J498													TRUE	18381	1224.549116	612.778196	1.153408	2	1624.55157522	42.81	1	68.3	8567556.86994186	64997069.9305739	0.131814509163155	8567556.86994186	64997069.9305739	7.58641826570274	ATSGVDDDLAR	ICPL (N-term)
		B7J498													TRUE	256	1230.569257	615.7882665	0.381067	2	40.59298292	82.64	1	73.6	1664066.5459633	121570.509333677	0.073056278685839	1664066.5459633	121570.509333677	13.6880774382207	ATSGVDDDLAR	ICPL:13C(6) (N-term)
		B7J498													TRUE	9181	1296.642682	648.824979	0.111442	2	823.00699149	61.34	1	154.6	83273433.1794712	13399492.3763034	0.160909570612091	83273433.1794712	13399492.3763034	6.21467073832871	LQDHIEQFR	ICPL:13C(6) (N-term)
		B7J498													TRUE	20573	1356.629102	678.818189	0.136422	2	1815.22388192	48.68	1	20.3	3027317.58677668		0.01	3027317.58677668		100	SEMAAAQAEVK	ICPL:13C(6) (K); ICPL:13C(6) (N-term)
		B7J498													TRUE	20314	1490.706129	745.8567025	1.091795	2	1800.67229899	47.16	1	59	24274547.3920062	3899089.52458268	0.160624602453625	24274547.3920062	3899089.52458268	6.22569634243121	EAHDTVAAQAQK	ICPL:13C(6) (K); ICPL:13C(6) (N-term)
TRUE	Elongation factor Ts	B7J9P2	358.57	29.1096	19	10	0.65	0.04	10	1.59	0.09	54880640	572.8		TRUE	5475	825.436567	825.436567	0.051133	1	501.18593467	20.91	1	1.8	16910719.8858653	22516359.7534971	0.751041468114706	16910719.8858653	22516359.7534971	1.33148440193354	ARGLAK	ICPL (K); ICPL (N-term)
		B7J9P2													TRUE	5468	837.476835	837.476835	0.013765	1	500.7027768	20.81	3	38.5	22516359.7534971	16910719.8858653	0.751041468114706	22516359.7534971	16910719.8858653	1.33148440193354	ARGLAK	ICPL:13C(6) (K); ICPL:13C(6) (N-term)
		B7J9P2													TRUE	9277	1006.531583	503.7694295	0.128341	2	828.5464251	41.44	1	52.3	9409332.91440401	15190154.0089227	0.6194363078134	9409332.91440401	15190154.0089227	1.61437098114249	LGENISLR	ICPL (N-term)
		B7J9P2													TRUE	4364	1054.531599	527.7694375	0.138125	2	408.85171149	36.15	1	35	12486052.395264	20807424.061024	0.600076797524041	12486052.395264	20807424.061024	1.66645336751241	AISAQQVK	ICPL (K); ICPL (N-term)
		B7J9P2													TRUE	4358	1066.571866	533.789571	0.110458	2	408.6116363	48.64	1	57.8	20807424.061024	12486052.395264	0.600076797524041	20807424.061024	12486052.395264	1.66645336751241	AISAQQVK	ICPL:13C(6) (K); ICPL:13C(6) (N-term)
		B7J9P2													TRUE	4645	1217.547315	609.2772955	0.164609	2	427.07912802	52.38	1	2.4	8557626.93306268	11702183.6526806	0.731284620635941	8557626.93306268	11702183.6526806	1.36745662602665	FEVGEGIEK	ICPL (K); ICPL (N-term)
		B7J9P2													TRUE	4644	1229.587583	615.2974295	0.166141	2	426.91840269	53.87	1	45.4	11702183.6526806	8557626.93306268	0.731284620635941	11702183.6526806	8557626.93306268	1.36745662602665	FEVGEGIEK	ICPL:13C(6) (K); ICPL:13C(6) (N-term)
		B7J9P2													TRUE	7949	1242.619199	621.8132375	0.180725	2	703.33099271	55.51	1	38.3	28469488.7509937	14223346.2920357	0.499599638632051	28469488.7509937	14223346.2920357	2.00160272881319	NEDFLALAK	ICPL:13C(6) (K); ICPL:13C(6) (N-term)
		B7J9P2													TRUE	6654	1441.65286	721.330068	0.166464	2	598.56262502	36.02	1	23.9	4841315.83523427	10873822.6774836	0.445226667642757	4841315.83523427	10873822.6774836	2.24604695243094	DCAGQALAQGLK	ICPL (K); ICPL (N-term)
		B7J9P2													TRUE	7731	1441.65286	721.330068	0.190264	2	688.81125138	83.49	1	24.2	10065486.6568518	16225730.8466704	0.620341034371174	10065486.6568518	16225730.8466704	1.61201652735044	DCAGQALAQGLK	ICPL (K); ICPL (N-term)
		B7J9P2													TRUE	7728	1453.693128	727.350202	0.194796	2	688.68038472	63.23	1	54.5	16225730.8466704	10065486.6568518	0.620341034371174	16225730.8466704	10065486.6568518	1.61201652735044	DCAGQALAQGLK	ICPL:13C(6) (K); ICPL:13C(6) (N-term)
		B7J9P2													TRUE	3552	1563.728498	782.367887	0.116226	2	335.37723029	90.54	1	4	1976036.61164664	2545069.8466154	0.776417438709787	1976036.61164664	2545069.8466154	1.28796694940514	DAEALLADAGVEER	ICPL (N-term)
		B7J9P2													TRUE	2443	2185.09712	729.037224	0.378828	3	244.58873685	75.37	1	69.6	4602999.94464767	6620424.16347764	0.695272663954171	4602999.94464767	6620424.16347764	1.43828464981318	LQHLQVMDGVIGAYVHGSR	ICPL (N-term)
		B7J9P2													TRUE	2339	2201.092039	734.368863666667	0.300709	3	236.77987072	55.25	1	28.5	951909.131664215	1265778.17529711	0.752034716857696	951909.131664215	1265778.17529711	1.32972584587372	LQHLQVMDGVIGAYVHGSR	ICPL (N-term); Oxidation (M)
		B7J9P2													TRUE	2330	2207.11218	736.375577333333	1.190768	3	236.08110377	43.26	1	8.8	1265778.17529711	951909.131664215	0.752034716857696	1265778.17529711	951909.131664215	1.32972584587372	LQHLQVMDGVIGAYVHGSR	ICPL:13C(6) (N-term); Oxidation (M)
TRUE	Heavy metal-binding protein, putative	B7JBW5	353.874	78.3784	11	7	0.12	0.04	8	14.78	4.11	55135854	741.7		TRUE	7870	1234.65051	617.828893	0.150414	2	697.74647643	58.54	1	231.7	111174805.365019	5833633.98487346	0.0524726260209761	111174805.365019	5833633.98487346	19.0575558311156	ALEGIPGVEK	ICPL:13C(6) (K); ICPL:13C(6) (N-term)
		B7JBW5													TRUE	9462	1234.65051	617.828893	0.160814	2	840.91750829	38.14	1	24	2750672.15056582	1152802.53826872	0.419098487630226	2750672.15056582	1152802.53826872	2.38607398860935	ALEGIPGVEK	ICPL:13C(6) (K); ICPL:13C(6) (N-term)
		B7JBW5													TRUE	8544	1402.612028	701.809652	0.137296	2	763.14590221	85.95	1	83	41928261.0621449	2606447.35132419	0.0621644515011244	41928261.0621449	2606447.35132419	16.0863640851382	ITGMTCGHCVR	ICPL:13C(6) (N-term)
		B7JBW5													TRUE	8438	1418.606946	709.807111	0.172378	2	756.28620248	77.47	1	72.8	11114797.2941536	689959.499477858	0.0620757609174556	11114797.2941536	689959.499477858	16.1093474364291	ITGMTCGHCVR	ICPL:13C(6) (N-term); Oxidation (M)
		B7JBW5													TRUE	324	1704.698026	568.904192666667	0.137422	3	45.7394576	50.55	1	18.5	1763707.61110524	86110.4294693718	0.0488235288701907	1763707.61110524	86110.4294693718	20.4819279380387	EEGYEAEECKK	2 ICPL:13C(6) (K); ICPL:13C(6) (N-term)
		B7JBW5													TRUE	325	1704.698026	852.852651	0.303098	2	45.605408	28.54	1	25.6	1763707.61110524	86110.4294693718	0.0488235288701907	1763707.61110524	86110.4294693718	20.4819279380387	EEGYEAEECKK	2 ICPL:13C(6) (K); ICPL:13C(6) (N-term)
		B7JBW5													TRUE	18442	1704.698026	852.852651	1.007298	2	1629.34521629	62.81	1	67.7	18335917.9464885	1155421.29840021	0.063014096254804	18335917.9464885	1155421.29840021	15.8694650789943	EEGYEAEECKK	2 ICPL:13C(6) (K); ICPL:13C(6) (N-term)
		B7JBW5													TRUE	18441	1704.698026	568.904192666667	1.128922	3	1629.33222483	55.78	1	64	18335917.9464885	1155421.29840021	0.063014096254804	18335917.9464885	1155421.29840021	15.8694650789943	EEGYEAEECKK	2 ICPL:13C(6) (K); ICPL:13C(6) (N-term)
		B7JBW5													TRUE	2673	2742.476804	914.830452	0.193344	3	260.20749524	57.15	1	33.2	6364265.99422852	1050378.0032716	0.165043070830815	6364265.99422852	1050378.0032716	6.05902444111149	ADVTLEPGEAVVHGLADTATLIAVIR	ICPL:13C(6) (N-term)
		B7JBW5													TRUE	1759	2742.476804	914.830452	0.272244	3	170.06452255	96.34	1	84.5	51378676.0869013	3594895.589899	0.0699686302507802	51378676.0869013	3594895.589899	14.2921191456203	ADVTLEPGEAVVHGLADTATLIAVIR	ICPL:13C(6) (N-term)
TRUE	Pyruvate dehydrogenase, E1 component, pyruvate dehydrogenase beta subunit	B7JAH8	350.023	22.6994	17	9	0.29	0.02	9	3.61	0.24	94467170	996.6		TRUE	4269	855.477842	855.477842	0.015458	1	403.88213603	28.05	1	35	28644142.7228318	7487605.52004027	0.261400929065753	28644142.7228318	7487605.52004027	3.8255411087252	AGIAASVR	ICPL:13C(6) (N-term)
		B7JAH8													TRUE	4268	855.477842	428.242559	0.015482	2	403.85848643	55.69	1	75.5	28644142.7228318	7487605.52004027	0.261400929065753	28644142.7228318	7487605.52004027	3.8255411087252	AGIAASVR	ICPL:13C(6) (N-term)
		B7JAH8													TRUE	5334	855.477842	428.242559	0.059082	2	493.64452666	46.03	1	46.7	11302498.2508319	4018722.83799833	0.355560580396687	11302498.2508319	4018722.83799833	2.81246025328323	AGIAASVR	ICPL:13C(6) (N-term)
		B7JAH8													TRUE	4236	951.535383	476.2713295	0.057541	2	402.19552803	24.72	1	78.1	58942721.182826	16799293.4864212	0.28501048389527	58942721.182826	16799293.4864212	3.50864286230068	VVTPATPR	ICPL:13C(6) (N-term)
		B7JAH8													TRUE	10431	1016.523862	508.765569	0.064662	2	925.83942112	57.91	1	60.5	14687645.5585472	4025941.73558177	0.274103954887375	14687645.5585472	4025941.73558177	3.64825089959349	ATSGLFAK	ICPL:13C(6) (K); ICPL:13C(6) (N-term)
		B7JAH8													TRUE	10012	1047.477201	524.2422385	0.126723	2	900.34605472	23.64	1	80.3	3374679.9602436	641286.485953971	0.190028830439874	3374679.9602436	641286.485953971	5.26235938875816	IHYMSGGR	ICPL:13C(6) (N-term); Oxidation (M)
		B7JAH8													TRUE	12493	1442.775007	721.8911415	0.137917	2	1103.37845039	24.95	1	43.8	15370852.3899321	48179336.577572	0.319034122962319	15370852.3899321	48179336.577572	3.13446094955212	AAIPNAGEVVAAVR	ICPL (N-term)
		B7JAH8													TRUE	12495	1448.795148	483.603233333333	0.1268	3	1103.50950052	51.42	1	43.4	48179336.577572	15370852.3899321	0.319034122962319	48179336.577572	15370852.3899321	3.13446094955212	AAIPNAGEVVAAVR	ICPL:13C(6) (N-term)
		B7JAH8													TRUE	13548	1448.795148	724.901212	0.131976	2	1193.61933643	53.55	1	34.3	6981687.21835659		0.01	6981687.21835659		100	AAIPNAGEVVAAVR	ICPL:13C(6) (N-term)
		B7JAH8													TRUE	12490	1448.795148	724.901212	0.148976	2	1103.26005893	60.11	1	133	48179336.577572	15370852.3899321	0.319034122962319	48179336.577572	15370852.3899321	3.13446094955212	AAIPNAGEVVAAVR	ICPL:13C(6) (N-term)
		B7JAH8													TRUE	13498	1498.780103	749.8936895	1.096021	2	1190.6149615	43.83	1	34.9	7384570.66197096	19813714.9358196	0.372699954849002	7384570.66197096	19813714.9358196	2.68312348040167	VHALDVPIPYNR	ICPL (N-term)
		B7JAH8													TRUE	14541	1504.800245	752.9037605	0.089279	2	1280.70652291	52.61	1	64.3	18081772.2958037	5382841.56755888	0.297694356476777	18081772.2958037	5382841.56755888	3.3591500081998	VHALDVPIPYNR	ICPL:13C(6) (N-term)
		B7JAH8													TRUE	13499	1504.800245	502.271599	0.155703	3	1190.5536367	47.14	1	26.7	19813714.9358196	7384570.66197096	0.372699954849002	19813714.9358196	7384570.66197096	2.68312348040167	VHALDVPIPYNR	ICPL:13C(6) (N-term)
		B7JAH8													TRUE	13495	1504.800245	752.9037605	0.193679	2	1190.4504863	48.05	1	111.2	19813714.9358196	7384570.66197096	0.372699954849002	19813714.9358196	7384570.66197096	2.68312348040167	VHALDVPIPYNR	ICPL:13C(6) (N-term)
		B7JAH8													TRUE	7319	1697.856214	566.623588666667	0.181234	3	666.37715112	57.15	1	28.1	25494652.5108499	5974580.79921556	0.234346429968909	25494652.5108499	5974580.79921556	4.26718683161791	VPGGTAHQLGAQHSAR	ICPL:13C(6) (N-term)
		B7JAH8													TRUE	7331	1697.856214	849.431745	0.18991	2	666.76400125	79.31	1	34.4	25494652.5108499	5974580.79921556	0.234346429968909	25494652.5108499	5974580.79921556	4.26718683161791	VPGGTAHQLGAQHSAR	ICPL:13C(6) (N-term)
TRUE	Heat shock protein, Hsp20 family	B7J4U6	345.713	59.3103	23	13	0.29	0.03	13	3.9	0.39	163786990	1669.1		TRUE	3281	757.35153	379.179403	0.025994	2	317.67746335	39.49	1	23.6	7705033.19375199	35999410.9147844	0.21403220213772	7705033.19375199	35999410.9147844	4.67219413720064	VSVDK	ICPL (K); ICPL (N-term)
		B7J4U6													TRUE	3268	769.391797	769.391797	0.083503	1	317.03173857	31.8	1	38.8	35999410.9147844	7705033.19375199	0.21403220213772	35999410.9147844	7705033.19375199	4.67219413720064	VSVDK	ICPL:13C(6) (K); ICPL:13C(6) (N-term)
		B7J4U6													TRUE	3272	769.391797	385.1995365	0.087727	2	317.27870497	31.05	1	54.7	35999410.9147844	7705033.19375199	0.21403220213772	35999410.9147844	7705033.19375199	4.67219413720064	VSVDK	ICPL:13C(6) (K); ICPL:13C(6) (N-term)
		B7J4U6													TRUE	9073	905.451566	453.229421	0.037758	2	817.15010829	41.5	1	84.5							YYGSFIR
		B7J4U6													TRUE	4498	1007.523511	504.2653935	0.051813	2	417.11455309	38.58	1	57.2	9395378.00481786	5728652.07230062	0.609730877178441	9395378.00481786	5728652.07230062	1.64006783554664	AEIPEVK	ICPL:13C(6) (K); ICPL:13C(6) (N-term)
		B7J4U6													TRUE	3426	1007.523511	504.2653935	0.091413	2	326.24584683	50.13	1	190.9	107635559.099524	27995299.4704375	0.260093408764217	107635559.099524	27995299.4704375	3.84477255594944	AEIPEVK	ICPL:13C(6) (K); ICPL:13C(6) (N-term)
		B7J4U6													TRUE	10358	1010.47302	505.740148	0.158704	2	921.10152992	50.82	1	70	11196620.7734008	51431295.8867398	0.21770053778263	11196620.7734008	51431295.8867398	4.59346591508414	YYGSFIR	ICPL (N-term)
		B7J4U6													TRUE	10355	1016.493162	508.750219	0.138162	2	920.84647179	46.51	1	90.1	51431295.8867398	11196620.7734008	0.21770053778263	51431295.8867398	11196620.7734008	4.59346591508414	YYGSFIR	ICPL:13C(6) (N-term)
		B7J4U6													TRUE	3154	1032.529996	516.768636	0.150728	2	311.20403883	31.17	1	190	82845752.3107798	24672433.2200047	0.297811686559992	82845752.3107798	24672433.2200047	3.35782659018842	HNAIEVK	ICPL:13C(6) (K); ICPL:13C(6) (N-term)
		B7J4U6													TRUE	6507	1077.568723	539.2879995	0.115601	2	589.77462448	54.27	1	40	25628180.4324261	119145511.975282	0.215099838907428	25628180.4324261	119145511.975282	4.64900394662949	GVLTIQGER	ICPL (N-term)
		B7J4U6													TRUE	6502	1083.588865	542.2980705	0.123459	2	589.55099197	69.21	1	117.3	119145511.975282	25628180.4324261	0.215099838907428	119145511.975282	25628180.4324261	4.64900394662949	GVLTIQGER	ICPL:13C(6) (N-term)
		B7J4U6													TRUE	18472	1167.471845	584.2395605	0.136879	2	1631.34114163	33.98	1	71.3	2930059.85283454	623717.720459115	0.212868593744162	2930059.85283454	623717.720459115	4.69773385735736	EIDDMFDR	ICPL:13C(6) (N-term); Oxidation (M)
		B7J4U6													TRUE	11606	1336.675687	668.8414815	0.146237	2	1023.61659288	36.97	1	39.1	7927969.34085757	2095024.2209724	0.26425735656866	7927969.34085757	2095024.2209724	3.78418982534618	DGMLNLQVPK	ICPL:13C(6) (K); ICPL:13C(6) (N-term)
		B7J4U6													TRUE	11473	1483.72714	742.367208	0.135984	2	1015.19631768	62.77	1	14.9	3052262.28689618	1274686.23709815	0.417620150984588	3052262.28689618	1274686.23709815	2.39452046948018	QELITAGDWSPR	ICPL:13C(6) (N-term)
		B7J4U6													TRUE	10430	1483.72714	742.367208	0.148984	2	925.82681312	74.54	1	121.2	21725699.9377411	6089782.64304233	0.280303173683412	21725699.9377411	6089782.64304233	3.5675657426892	QELITAGDWSPR	ICPL:13C(6) (N-term)
		B7J4U6													TRUE	9220	1639.828245	820.4177605	0.075679	2	825.2047003	68.3	1	69.6	56259243.4584411	12366017.6645201	0.219804194019334	56259243.4584411	12366017.6645201	4.54950372744953	RQELITAGDWSPR	ICPL:13C(6) (N-term)
		B7J4U6													TRUE	9219	1639.828245	547.280932333333	0.075803	3	825.19159203	46.15	1	54	56259243.4584411	12366017.6645201	0.219804194019334	56259243.4584411	12366017.6645201	4.54950372744953	RQELITAGDWSPR	ICPL:13C(6) (N-term)
		B7J4U6													TRUE	8706	1639.828245	820.4177605	0.086279	2	772.02424408	62.42	1	65.7	64048855.4571112	10224745.5410475	0.159639785411844	64048855.4571112	10224745.5410475	6.26410263218637	RQELITAGDWSPR	ICPL:13C(6) (N-term)
		B7J4U6													TRUE	6775	1800.847776	900.927526	0.101948	2	607.26546662	40.12	1	66.5	20341199.6998934	8525720.2863012	0.419135567817364	20341199.6998934	8525720.2863012	2.38586289683662	SFTLPDNVDESNIK	ICPL:13C(6) (K); ICPL:13C(6) (N-term)
TRUE	Enoyl-[acyl-carrier-protein] reductase [NADH]	B7J4G3	340.52	32.2957	10	7	1.13	0.09	7	0.93	0.07	50295416	301.4		TRUE	7536	1088.584699	544.7959875	0.174025	2	678.36106791	63.78	1	21.3	13510021.3433553	11403429.4272644	1.18473319184615	13510021.3433553	11403429.4272644	0.844071903178231	VNAVSAGPIR	ICPL (N-term)
		B7J4G3													TRUE	9335	1132.610914	566.809095	0.12541	2	832.1069835	42.33	1	62.3	9559798.77144713	6679072.97224441	1.431306232343	9559798.77144713	6679072.97224441	0.698662506599326	ALIVGVANDR	ICPL (N-term)
		B7J4G3													TRUE	9333	1132.610914	566.809095	0.13661	2	831.9101003	68.81	1	28.1	9559798.77144713	6679072.97224441	1.431306232343	9559798.77144713	6679072.97224441	0.698662506599326	ALIVGVANDR	ICPL (N-term)
		B7J4G3													TRUE	9317	1242.61131	621.809293	1.159814	2	830.77528323	80.64	1	2.5	9868392.73170748	8243478.31340833	1.19711514442346	9868392.73170748	8243478.31340833	0.835341533066652	TLAASGISDFR	ICPL (N-term)
		B7J4G3													TRUE	3367	1546.701963	773.8546195	-0.848639	2	323.17007137	50.53	1	53.3	18537699.6410886	18042348.3533791	1.02745492316231	18537699.6410886	18042348.3533791	0.97327870786019	EELSGSYLDATTR	ICPL (N-term)
		B7J4G3													TRUE	3366	1546.701963	773.8546195	0.151761	2	322.80067989	103.7	1	8.8	18537699.6410886	18042348.3533791	1.02745492316231	18537699.6410886	18042348.3533791	0.97327870786019	EELSGSYLDATTR	ICPL (N-term)
		B7J4G3													TRUE	1680	1565.843412	783.425344	0.219312	2	165.34808148	114.24	1	61.5	16151082.9304036	11644847.1527852	1.38697251397934	16151082.9304036	11644847.1527852	0.720994821397664	QGALLALSYLGAQR	ICPL (N-term)
		B7J4G3													TRUE	2600	1571.863553	786.4354145	-0.841029	2	256.07282858	20.86	1	13.5	1802364.19404079	1499683.85001523	0.832064826284102	1802364.19404079	1499683.85001523	1.20182943493222	QGALLALSYLGAQR	ICPL:13C(6) (N-term)
		B7J4G3													TRUE	11285	1700.886655	567.633735666667	0.184993	3	1004.10316835	49.24	1	5.3	3670995.13235472	4450695.53216789	0.824813808498513	3670995.13235472	4450695.53216789	1.21239483347205	ILEHYAEQAPLRR	ICPL (N-term)
TRUE	Transketolase pyridine binding domain protein	B7JB06	339.272	25.6233	33	18	2.07	0.09	18	0.5	0.02	128350739	1739.6		TRUE	6506	783.378385	392.1928305	0.041139	2	589.76327463	25.51	1	89.1	50965301.3413735	25848965.2230802	1.97165731399829	50965301.3413735	25848965.2230802	0.507187528431154	ENFLR	ICPL (N-term)
		B7JB06													TRUE	5413	787.373319	394.1902975	0.036005	2	497.94366799	24.97	2	78.2	27781696.2054434	13425293.5782696	2.0693548370824	27781696.2054434	13425293.5782696	0.483242401003546	IHGLDAG	ICPL (N-term)
		B7JB06													TRUE	5414	787.373319	787.373319	0.072781	1	497.95751013	30.64	1	3.2	27781696.2054434	13425293.5782696	2.0693548370824	27781696.2054434	13425293.5782696	0.483242401003546	IHGLDAG	ICPL (N-term)
		B7JB06													TRUE	6505	789.398527	789.398527	0.065173	1	589.67942449	20.56	1	62.2	25848965.2230802	50965301.3413735	1.97165731399829	25848965.2230802	50965301.3413735	0.507187528431154	ENFLR	ICPL:13C(6) (N-term)
		B7JB06													TRUE	19279	824.371915	412.6895955	1.065009	2	1710.35065204	40.78	1	25.2	11221556.1414282	6887148.34414377	1.62934723933601	11221556.1414282	6887148.34414377	0.613742716014004	AALECR	ICPL (N-term)
		B7JB06													TRUE	10300	846.38931	423.698293	0.046614	2	917.62397952	29.73	1	67.6	28859123.662675	13415520.0746076	2.15117442351703	28859123.662675	13415520.0746076	0.464862351033845	FSFGQR	ICPL (N-term)
		B7JB06													TRUE	21326	851.436964	851.436964	0.062436	1	1889.09824588	31.1	1	65.8	18241834.1930398	8343629.79222766	2.18631874223766	18241834.1930398	8343629.79222766	0.457389849284518	SAAIATGR	ICPL (N-term)
		B7JB06													TRUE	21324	851.436964	426.22212	0.10256	2	1888.98533761	54.88	1	59.6	18241834.1930398	8343629.79222766	2.18631874223766	18241834.1930398	8343629.79222766	0.457389849284518	SAAIATGR	ICPL (N-term)
		B7JB06													TRUE	19248	898.447278	449.727277	-0.026554	2	1708.50803497	53.54	1	25.8	6394077.97223999	14525956.9034824	2.27178288512387	6394077.97223999	14525956.9034824	0.440182909444479	AADGALGGR	ICPL:13C(6) (N-term)
		B7JB06													TRUE	754	977.520307	489.2637915	0.241417	2	76.61797493	61.97	1	24.1	3416320.25258406	1675320.23915102	2.03920431016539	3416320.25258406	1675320.23915102	0.490387351093278	DVLAWLR	ICPL (N-term)
		B7JB06													TRUE	5542	997.473737	499.2405065	0.051987	2	505.0974936	49.87	1	28.3	22773235.9407785	10803503.8120874	2.1079490817876	22773235.9407785	10803503.8120874	0.474394760594489	NINDALK	ICPL (K); ICPL (N-term)
		B7JB06													TRUE	5545	1009.514005	505.2606405	0.052119	2	505.25819332	45.16	1	46.4	10803503.8120874	22773235.9407785	2.1079490817876	10803503.8120874	22773235.9407785	0.474394760594489	NINDALK	ICPL:13C(6) (K); ICPL:13C(6) (N-term)
		B7JB06													TRUE	16669	1016.588712	508.797994	1.148212	2	1467.35967542	52.58	1	8.6	207814.863475074	64561.1792076282	3.21888270978978	207814.863475074	64561.1792076282	0.310666802788011	ILSVINPR	ICPL (N-term)
		B7JB06													TRUE	15699	1016.588712	508.797994	1.149212	2	1378.39815762	63.67	1	121.1	57292207.9235578	23396063.277963	2.44879692976049	57292207.9235578	23396063.277963	0.408363791969393	ILSVINPR	ICPL (N-term)
		B7JB06													TRUE	13508	1039.535963	520.2716195	0.076761	2	1191.23097803	28.85	1	23.8	11188255.8686891	6016070.95996264	1.85972804229665	11188255.8686891	6016070.95996264	0.537713029677749	HTAFILK	ICPL (K); ICPL (N-term)
		B7JB06													TRUE	12446	1039.535963	520.2716195	1.085161	2	1100.76303387	40.1	1	30.2	9240292.14391975	5819375.77310389	1.58784936807599	9240292.14391975	5819375.77310389	0.629782660814801	HTAFILK	ICPL (K); ICPL (N-term)
		B7JB06													TRUE	6280	1074.526807	537.7670415	0.010317	2	578.09430769	28.28	1	68							HFHFAYPR
		B7JB06													TRUE	6282	1074.526807	537.7670415	0.021917	2	578.2229333	24.59	1	43.3							HFHFAYPR
		B7JB06													TRUE	11083	1074.526807	358.847119666667	0.088441	3	992.18623502	33.44	1	111.9							HFHFAYPR
		B7JB06													TRUE	12115	1074.526807	537.7670415	0.093717	2	1082.03955013	38.25	1	56.8							HFHFAYPR
		B7JB06													TRUE	11085	1074.526807	537.7670415	0.097917	2	992.51614328	35.37	1	89.6							HFHFAYPR
		B7JB06													TRUE	5317	1080.529996	540.768636	0.090528	2	492.811676	34.07	1	44.4	11525221.9332746	16022161.2232423	1.39018244646418	11525221.9332746	16022161.2232423	0.719330043724422	SHNLYPK	ICPL:13C(6) (K); ICPL:13C(6) (N-term)
		B7JB06													TRUE	19468	1211.521497	606.2643865	0.153627	2	1720.84348512	41.98	1	56.4	16287155.9537336	9847600.12128821	1.65392133648122	16287155.9537336	9847600.12128821	0.604623677041096	DTPDSPEIK	ICPL (K); ICPL (N-term)
		B7JB06													TRUE	19471	1223.561765	612.2845205	0.140959	2	1721.05386857	25.96	2	81.9	9847600.12128821	16287155.9537336	1.65392133648122	9847600.12128821	16287155.9537336	0.604623677041096	DTPDSPEIK	ICPL:13C(6) (K); ICPL:13C(6) (N-term)
		B7JB06													TRUE	13779	1295.725248	648.366262	0.085276	2	1208.19474443	20.64	2	43							QMKGAGVHVLGAK
		B7JB06													TRUE	14714	1333.689878	667.348577	1.180846	2	1289.83859758	53.01	1	98.5	54255156.9789471	22962378.0967799	2.36278475819347	54255156.9789471	22962378.0967799	0.423229410352459	ALSPESWALVR	ICPL (N-term)
		B7JB06													TRUE	9577	1523.814283	762.4107795	0.083241	2	849.11427522	48.71	1	18.1	2003898.55077375	4658597.25147244	2.32476701461441	2003898.55077375	4658597.25147244	0.43015063174658	TAVTEQVLEIAK	ICPL:13C(6) (K); ICPL:13C(6) (N-term)
		B7JB06													TRUE	19482	1849.762357	925.3848165	0.994567	2	1721.74360192	68.29	1	42.6	10574983.9301427	5145906.06829515	2.05502855858506	10574983.9301427	5145906.06829515	0.486611242370532	NFDDAGQEGAYVDSTR	ICPL (N-term)
		B7JB06													TRUE	13438	1929.00105	643.671867333333	-0.639502	3	1187.23823615	21.79	1	148.1							AALECRALSPESWALVR
		B7JB06													TRUE	1785	2464.236249	822.083600333333	0.131699	3	171.35308147	35.94	1	5.9	5287729.87467605	2827428.97272103	1.87015480342458	5287729.87467605	2827428.97272103	0.534715093193797	AIPNPAAMEAVYQTLLMADALR	ICPL (N-term)
TRUE	Transaldolase	B7J4G2	336.1	32.2314	17	11	0.31	0.02	11	3.43	0.26	84247352	633.5		TRUE	7854	937.518033	937.518033	0.067367	1	696.52865138	27.4	1	25.6	10338860.9892097	3628445.51233075	0.350952151897354	10338860.9892097	3628445.51233075	2.84939127625716	DNLLIK	ICPL:13C(6) (K); ICPL:13C(6) (N-term)
		B7J4G2													TRUE	6688	948.51489	474.761083	-1.031566	2	600.52879996	26.67	1	13.9	11634084.1787741	23479388.0419489	0.495502018961838	11634084.1787741	23479388.0419489	2.01815524807582	LVVEDLR	ICPL (N-term)
		B7J4G2													TRUE	6689	954.535032	954.535032	0.027468	1	600.5961413	23.89	1	48.3	23479388.0419489	11634084.1787741	0.495502018961838	23479388.0419489	11634084.1787741	2.01815524807582	LVVEDLR	ICPL:13C(6) (N-term)
		B7J4G2													TRUE	7567	972.466291	486.7367835	0.085633	2	679.85267645	42.08	1	36.8	14507429.0040242	4309460.13615405	0.297051954206267	14507429.0040242	4309460.13615405	3.36641448016067	NACDLLR	ICPL:13C(6) (N-term)
		B7J4G2													TRUE	4549	1139.577039	570.2921575	0.102685	2	420.55296109	48.03	1	107.5	12374159.796303	4023995.36508602	0.325193421721309	12374159.796303	4023995.36508602	3.0750929545463	VDTLVDQK	ICPL:13C(6) (K); ICPL:13C(6) (N-term)
		B7J4G2													TRUE	4134	1194.563352	597.785314	0.137372	2	396.53264483	45.29	1	75.5	26050510.3517263	5959237.46551893	0.228757033357852	26050510.3517263	5959237.46551893	4.37145029082304	AIHSSSYYR	ICPL:13C(6) (N-term)
		B7J4G2													TRUE	8489	1234.67465	412.229734	0.120198	3	759.67938541	36	1	1.4	9829931.3787167	3085288.21919718	0.313866709779612	9829931.3787167	3085288.21919718	3.18606583253818	LRDHGSLVAR	ICPL:13C(6) (N-term)
		B7J4G2													TRUE	8491	1234.67465	617.840963	0.125874	2	759.76450222	34.82	1	13.2	9829931.3787167	3085288.21919718	0.313866709779612	9829931.3787167	3085288.21919718	3.18606583253818	LRDHGSLVAR	ICPL:13C(6) (N-term)
		B7J4G2													TRUE	11428	1424.701292	712.854284	0.150432	2	1012.54549314	83.94	1	53.7	14447374.2947242	2550059.40970441	0.176506772627578	14447374.2947242	2550059.40970441	5.66550498382268	GLTQWVAGGGDPR	ICPL:13C(6) (N-term)
		B7J4G2													TRUE	13345	1516.77342	758.890348	0.087504	2	1181.62581962	63.73	1	26.2	34635113.6107649	10052882.4283322	0.29025117518909	34635113.6107649	10052882.4283322	3.44529182129419	HVHEVLAAYQK	ICPL:13C(6) (K); ICPL:13C(6) (N-term)
		B7J4G2													TRUE	12272	1516.77342	758.890348	0.146704	2	1091.45301733	63.54	1	41.2	12110000.638471	3949024.88231425	0.326096174575666	12110000.638471	3949024.88231425	3.06657997844119	HVHEVLAAYQK	ICPL:13C(6) (K); ICPL:13C(6) (N-term)
		B7J4G2													TRUE	9417	1554.785367	777.8963215	0.071957	2	837.7423835	88.94	1	32.4	6717446.45614993	2010850.62542578	0.299347473560406	6717446.45614993	2010850.62542578	3.34059943151051	LGQDEAATVAEALR	ICPL:13C(6) (N-term)
		B7J4G2													TRUE	14732	1634.828504	817.91789	1.08462	2	1290.68013091	56.32	1	15.5	4510650.80549496	15440874.728574	0.292124046388888	4510650.80549496	15440874.728574	3.42320330134259	QIGQSIWLDNLSR	ICPL (N-term)
		B7J4G2													TRUE	14725	1640.848646	820.927961	0.093878	2	1290.44936451	69.59	1	68.8	15440874.728574	4510650.80549496	0.292124046388888	15440874.728574	4510650.80549496	3.42320330134259	QIGQSIWLDNLSR	ICPL:13C(6) (N-term)
TRUE	Molybdenum-pterin binding protein	B7JAC2	335.481	42.6471	32	11	0.28	0.03	11	4.07	0.48	70282105	3639.5		TRUE	10657	924.518903	462.7630895	0.034421	2	941.4070798	33.8	1	98	23915913.0103175	87841214.6763874	0.27226300431324	23915913.0103175	87841214.6763874	3.67291914126348	VIEIIK	ICPL (K); ICPL (N-term)
		B7JAC2													TRUE	10656	924.518903	924.518903	0.035397	1	941.32136353	36.94	1	147.2	23915913.0103175	87841214.6763874	0.27226300431324	23915913.0103175	87841214.6763874	3.67291914126348	VIEIIK	ICPL (K); ICPL (N-term)
		B7JAC2													TRUE	12793	924.518903	462.7630895	0.046021	2	1121.50869252	25.74	1	23.8	4046347.4346312	7059049.8097608	0.573214178066313	4046347.4346312	7059049.8097608	1.74454861422551	VIEIIK	ICPL (K); ICPL (N-term)
		B7JAC2													TRUE	11711	924.518903	462.7630895	1.039821	2	1031.43372622	40.28	1	20.5	2547382.84157723	10291627.4960847	0.247519922630929	2547382.84157723	10291627.4960847	4.04007883232525	VIEIIK	ICPL (K); ICPL (N-term)
		B7JAC2													TRUE	10660	936.559171	468.7832235	0.005753	2	941.737955	34.72	1	325.3	87841214.6763874	23915913.0103175	0.27226300431324	87841214.6763874	23915913.0103175	3.67291914126348	VIEIIK	ICPL:13C(6) (K); ICPL:13C(6) (N-term)
		B7JAC2													TRUE	10651	936.559171	468.7832235	0.022753	2	941.11744673	41.26	1	602	87841214.6763874	23915913.0103175	0.27226300431324	87841214.6763874	23915913.0103175	3.67291914126348	VIEIIK	ICPL:13C(6) (K); ICPL:13C(6) (N-term)
		B7JAC2													TRUE	12785	936.559171	468.7832235	0.031953	2	1121.09960879	44.37	1	13	7059049.8097608	4046347.4346312	0.573214178066313	7059049.8097608	4046347.4346312	1.74454861422551	VIEIIK	ICPL:13C(6) (K); ICPL:13C(6) (N-term)
		B7JAC2													TRUE	11701	936.559171	936.559171	0.044529	1	1030.78675128	27.92	1	40.1	10291627.4960847	2547382.84157723	0.247519922630929	10291627.4960847	2547382.84157723	4.04007883232525	VIEIIK	ICPL:13C(6) (K); ICPL:13C(6) (N-term)
		B7JAC2													TRUE	11702	936.559171	468.7832235	0.056553	2	1030.91147661	30.79	1	71.2	10291627.4960847	2547382.84157723	0.247519922630929	10291627.4960847	2547382.84157723	4.04007883232525	VIEIIK	ICPL:13C(6) (K); ICPL:13C(6) (N-term)
		B7JAC2													TRUE	10678	936.559171	468.7832235	0.069153	2	943.06738006	38.61	1	22.5	2530465.58392229		0.01	2530465.58392229		100	VIEIIK	ICPL:13C(6) (K); ICPL:13C(6) (N-term)
		B7JAC2													TRUE	13819	936.559171	468.7832235	0.088553	2	1211.15938603	44.33	1	34.4	3355429.33039156	1418782.35303654	0.422831838592463	3355429.33039156	1418782.35303654	2.36500638960593	VIEIIK	ICPL:13C(6) (K); ICPL:13C(6) (N-term)
		B7JAC2													TRUE	3419	1169.5473	585.277288	0.098224	2	325.75773003	36.21	1	115.3	37656689.1782014	171203196.006145	0.219953190458253	37656689.1782014	171203196.006145	4.54642189056948	ASEVSIEKP	ICPL (K); ICPL (N-term)
		B7JAC2													TRUE	3415	1181.587568	591.297422	0.107556	2	325.63238017	32.19	1	599.4	171203196.006145	37656689.1782014	0.219953190458253	171203196.006145	37656689.1782014	4.54642189056948	ASEVSIEKP	ICPL:13C(6) (K); ICPL:13C(6) (N-term)
		B7JAC2													TRUE	10639	1258.610258	629.808767	0.163066	2	939.94395447	63.12	1	42.9	11695154.6525389	42035354.8364127	0.278221861051309	11695154.6525389	42035354.8364127	3.59425386711644	VGDEVFAAIK	ICPL (K); ICPL (N-term)
		B7JAC2													TRUE	9587	1258.610258	629.808767	0.169466	2	849.89713337	61.3	1	18.1	2901732.4402749	13267522.7955564	0.218709436945287	2901732.4402749	13267522.7955564	4.57227641370666	VGDEVFAAIK	ICPL (K); ICPL (N-term)
		B7JAC2													TRUE	11691	1258.610258	629.808767	1.150266	2	1030.00565954	48.1	1	14.2	1286244.94601658	7087720.45530053	0.181475123649194	1286244.94601658	7087720.45530053	5.51039712711854	VGDEVFAAIK	ICPL (K); ICPL (N-term)
[truncated: 2,777 more rows]

## Sheet: PROTEIN TABLE
Rel.	Protein Name and Species	Accession	Score	SC [%]	# Pept.	# (L/H)	Avg.(L/H)	Avg. (SD (L/H))	# (H/L)	Avg.(M4/M3)	Avg. (SD (H/L))
[truncated: 594 more rows]

[truncated: 1 more sheets: DEPURATE]
